# Supplementary material for: Unveiling Drivers of Retinal Degeneration in RCS Rats: Functional, Morphological, and Molecular Insights
Source: Int J Mol Sci. 2024 Mar 28;25(7):3749. doi: 10.3390/ijms25073749 (PMC11011632; doi:10.3390/ijms25073749)
Supplement: Supplementary file 1 [file ijms-25-03749-s001.zip › Supplementary File F1.xlsx]

## Sheet: p21vsp60RCS
ID	Entrez Gene Name	Symbol	Expr Log Ratio	Expr p-value adj	Cell Assignment
ENSRNOG00000000001	arylsulfatase family member J	ARSJ	2.388	0.00596
ENSRNOG00000000007	glutamate decarboxylase 1	GAD1	0.864	7.68e-32	Amacrine
ENSRNOG00000000009	transmembrane and coiled-coil domains 5B	Tmco5b	-2.088	0.0397
ENSRNOG00000000010	cerebellin 1 precursor	CBLN1	1.012	4.8e-08	Amacrine
ENSRNOG00000000017	STEAP family member 1	STEAP1	1.52	0.292	Muller
ENSRNOG00000000021	F-box and leucine-rich repeat protein 14, pseudogene 1	Fbxl14-ps1	-0.132	0.406
ENSRNOG00000000024	heme binding protein 1	HEBP1	0.874	0.0262	Microglia
ENSRNOG00000000033	transmembrane and coiled-coil domain family 2	TMCC2	0.011	0.915	RGCs
ENSRNOG00000000034	NUAK family kinase 2	NUAK2	1.661	7.08e-06
ENSRNOG00000000036	kelch domain containing 8A	KLHDC8A	0.364	0.00131	Bipolar
ENSRNOG00000000040	KIAA1614	KIAA1614	0.069	0.331
ENSRNOG00000000041	solute carrier family 26 member 1	SLC26A1	1.02	9.93e-07
ENSRNOG00000000042	xenotropic and polytropic retrovirus receptor 1	XPR1	-0.043	0.691
ENSRNOG00000000043	alpha-L-iduronidase	IDUA	0.566	6.99e-11	Microglia
ENSRNOG00000000044	transmembrane protein 175	TMEM175	0.049	0.644
ENSRNOG00000000047	CD82 molecule	CD82	1.276	1.05e-19	Muller
ENSRNOG00000000048	cyclin G associated kinase	GAK	-0.067	0.417
ENSRNOG00000000053	C-reactive protein	CRP	0.561	0.455
ENSRNOG00000000054	abhydrolase domain containing 8	ABHD8	0.155	0.0961
ENSRNOG00000000060			0.577	1.23e-14
ENSRNOG00000000062	polycomb group ring finger 3	PCGF3	-0.054	0.72
ENSRNOG00000000064	ATP synthase membrane subunit e	Atp5me	-0.73	5.21e-13
ENSRNOG00000000065	phosphodiesterase 6B	PDE6B	-2.926	0	Rods
ENSRNOG00000000066	F-box protein 28	FBXO28	0.013	0.92	Amacrine
ENSRNOG00000000068	protein phosphatase 2 regulatory subunit B'alpha	PPP2R5A	-0.084	0.445
ENSRNOG00000000073	transmembrane p24 trafficking protein 5	TMED5	0.235	0.204	Microglia
ENSRNOG00000000075	metal response element binding transcription factor 2	MTF2	-0.28	0.00938
ENSRNOG00000000081	ANTXR cell adhesion molecule 2	ANTXR2	0.859	0.00439	Vascular
ENSRNOG00000000082	helicase like transcription factor	HLTF	0.402	0.00288	Bipolar
ENSRNOG00000000095	G protein-coupled receptor 89A	GPR89A/GPR89B	-0.2	0.0717
ENSRNOG00000000096	PDZ domain containing 1	PDZK1	-0.062	0.648
ENSRNOG00000000097	CD160 molecule	CD160	0.142	0.856
ENSRNOG00000000098	ring finger protein 115	RNF115	-0.094	0.303
ENSRNOG00000000104	THO complex subunit 3	THOC3	-0.116	0.428	Bipolar
ENSRNOG00000000105	complexin 2	CPLX2	0.579	3.73e-17
ENSRNOG00000000108	aspartylglucosaminidase	AGA	0.549	9.7e-07	Muller
ENSRNOG00000000111	coordinator of PRMT5 and differentiation stimulator	COPRS	0.728	3.7e-05	Muller
ENSRNOG00000000112	chromosome alignment maintaining phosphoprotein 1	CHAMP1	-0.045	0.695	Bipolar
ENSRNOG00000000113	elaC ribonuclease Z 1	ELAC1	-0.1	0.454	Muller
ENSRNOG00000000121	phosphatidylinositol glycan anchor biosynthesis class V	PIGV	-0.342	0.00479	Muller
ENSRNOG00000000122	adenylate kinase 2	AK2	-0.06	0.691
ENSRNOG00000000123	ring finger protein 19B	Rnf19b	0.394	0.00141	Microglia
ENSRNOG00000000127	karyopherin subunit alpha 6	KPNA6	-0.365	3.56e-07
ENSRNOG00000000129	PHD finger protein 24	PHF24	0.789	8.4e-15	Muller
ENSRNOG00000000130	DnaJ heat shock protein family (Hsp40) member B5	DNAJB5	0.274	0.0196
ENSRNOG00000000133	thioredoxin domain containing 15	TXNDC15	0.145	0.161
ENSRNOG00000000137	lymphocyte antigen 86	LY86	1.507	0.00646	Microglia
ENSRNOG00000000138	GLIS family zinc finger 1	GLIS1	1.017	0.000231	Bipolar
ENSRNOG00000000142	plexin domain containing 2	PLXDC2	1.223	0.00204
ENSRNOG00000000145	phosphoinositide-3-kinase regulatory subunit 3	PIK3R3	0.588	1.23e-13
ENSRNOG00000000150	DnaJ heat shock protein family (Hsp40) member C1	DNAJC1	-0.307	0.0834	Rods
ENSRNOG00000000151	low density lipoprotein receptor adaptor protein 1	LDLRAP1	0.266	0.41
ENSRNOG00000000155	component of oligomeric golgi complex 3	COG3	-0.159	0.0668
ENSRNOG00000000156	multiple EGF like domains 6	MEGF6	-0.084	0.934	Muller
ENSRNOG00000000157	autophagy related 12	ATG12	-0.283	9.98e-05	Microglia
ENSRNOG00000000158	cysteine dioxygenase type 1	CDO1	0.254	0.184
ENSRNOG00000000161	CHM Rab escort protein	CHM	-0.244	0.0335
ENSRNOG00000000164	lysosomal associated membrane protein 2	LAMP2	0.649	9.16e-06
ENSRNOG00000000165	6-phosphofructo-2-kinase/fructose-2,6-biphosphatase 1	PFKFB1	0.273	0.762
ENSRNOG00000000166	apurinic/apyrimidinic endodeoxyribonuclease 2	APEX2	-0.421	0.0403	Muller
ENSRNOG00000000167	5'-aminolevulinate synthase 2	ALAS2	-2.486	7.25e-07	RBCs
ENSRNOG00000000168	glycine amidinotransferase	GATM	0.238	0.13
ENSRNOG00000000169	AFG2 AAA ATPase homolog B	AFG2B	-0.402	0.0174	Microglia
ENSRNOG00000000170	solute carrier family 30 member 4	SLC30A4	-0.221	0.0169
ENSRNOG00000000172	sulfide quinone oxidoreductase	SQOR	-0.48	0.177	Microglia
ENSRNOG00000000175	MIER family member 2	MIER2	-0.934	1.68e-22	Vascular
ENSRNOG00000000177	phospholipid phosphatase 2	PLPP2	-2.557	2.8e-88	Rods
ENSRNOG00000000184	transmembrane serine protease 6	TMPRSS6	0.72	0.00487
ENSRNOG00000000185	mercaptopyruvate sulfurtransferase	MPST	0.383	0.0575
ENSRNOG00000000186	thiosulfate sulfurtransferase	TST	0.52	0.0795	Muller
ENSRNOG00000000187	colony stimulating factor 2 receptor subunit beta	CSF2RB	3.41	1.04e-10	Microglia
ENSRNOG00000000190	E1A binding protein p300	EP300	-0.496	4.44e-10	Bipolar
ENSRNOG00000000204	synaptotagmin binding, cytoplasmic RNA interacting protein	Syncrip	-0.421	8.34e-07
ENSRNOG00000000219	anoctamin 10	ANO10	0.742	6.4e-08
ENSRNOG00000000221	abhydrolase domain containing 5, lysophosphatidic acid acyltransferase	ABHD5	-0.53	6.19e-05	Vascular
ENSRNOG00000000230	lipase maturation factor 1	LMF1	-0.073	0.609
ENSRNOG00000000231	potassium channel tetramerization domain containing 17	KCTD17	0.82	3.8e-18	RGCs
ENSRNOG00000000233	glutamate metabotropic receptor 6	GRM6	0.67	7.13e-29	Bipolar
ENSRNOG00000000236	zinc finger protein 207	ZNF207	-0.573	1.26e-10
ENSRNOG00000000237	chromosome 17 open reading frame 75	C17orf75	0.191	0.113	Bipolar
ENSRNOG00000000244	coilin	COIL	0.083	0.621	Bipolar
ENSRNOG00000000245	solute carrier family 16 member 6	SLC16A6	-1.089	1.3e-29	Rods
ENSRNOG00000000246	archaelysin family metallopeptidase 2	AMZ2	-0.106	0.143	Muller
ENSRNOG00000000247	major facilitator superfamily domain containing 11	MFSD11	0.525	2.81e-08
ENSRNOG00000000248	serine and arginine rich splicing factor 2	SRSF2	-0.454	2.21e-06
ENSRNOG00000000249	methyltransferase 23, arginine	METTL23	-1.163	1.03e-09	Microglia
ENSRNOG00000000250	jumonji domain containing 6, arginine demethylase and lysine hydroxylase	JMJD6	-0.675	2.39e-10	Microglia
ENSRNOG00000000251	ST6 N-acetylgalactosaminide alpha-2,6-sialyltransferase 1	ST6GALNAC1	-3.599	0.00977
ENSRNOG00000000257	sphingomyelin phosphodiesterase 3	SMPD3	0.121	0.366
ENSRNOG00000000258	protein arginine methyltransferase 7	PRMT7	-0.075	0.531
ENSRNOG00000000262	zinc finger protein 821	Zfp821	-0.127	0.204	Amacrine
ENSRNOG00000000264	differentially expressed in FDCP 8 homolog	DEF8	-0.557	5.56e-10	RGCs
ENSRNOG00000000274	phytanoyl-CoA 2-hydroxylase interacting protein like	PHYHIPL	0.43	0.00012
ENSRNOG00000000275	family with sequence similarity 13 member C	FAM13C	0.634	5.77e-10	Amacrine
ENSRNOG00000000277	tet methylcytosine dioxygenase 1	TET1	-0.992	2.05e-14	Muller
ENSRNOG00000000279	reticulon 4 interacting protein 1	RTN4IP1	0.171	0.752	Bipolar
ENSRNOG00000000281	proline dehydrogenase 1	PRODH	1.151	9.84e-06
ENSRNOG00000000283	ess-2 splicing factor homolog	ESS2	-0.211	0.0983
ENSRNOG00000000288	scavenger receptor class F member 2	SCARF2	0.6	0.0514
ENSRNOG00000000299	forkhead box O3	FOXO3	-0.79	2.28e-14	Muller
ENSRNOG00000000302	sestrin 1	SESN1	-0.239	0.0015
ENSRNOG00000000303	centrosomal protein 57 like 1	CEP57L1	-0.638	5.91e-07	Muller
ENSRNOG00000000304	CD164 molecule	CD164	0.637	0.002
ENSRNOG00000000306	sphingomyelin phosphodiesterase 2	SMPD2	-1.149	3.11e-12	Rods
ENSRNOG00000000307	microtubule associated monooxygenase, calponin and LIM domain containing 1	MICAL1	0.62	0.0776	Vascular
ENSRNOG00000000308	zinc finger and BTB domain containing 24	ZBTB24	-0.032	0.84	Rods
ENSRNOG00000000312	FIG4 phosphoinositide 5-phosphatase	FIG4	-0.432	0.00625	Bipolar
ENSRNOG00000000314	SEC63 homolog, protein translocation regulator	SEC63	0.063	0.301
ENSRNOG00000000316	sine oculis binding protein homolog	SOBP	0.671	0.000107
ENSRNOG00000000321	CD24a antigen	Cd24a	1.764	0.241
ENSRNOG00000000322	autophagy related 5	Atg5	-0.363	0.00282
ENSRNOG00000000323	PR/SET domain 1	PRDM1	-2.661	1.58e-144
ENSRNOG00000000327	HECT domain and ankyrin repeat containing E3 ubiquitin protein ligase 1	HACE1	-0.306	0.000183	Bipolar
ENSRNOG00000000340	RNA transcription, translation and transport factor	RTRAF	-0.379	4.31e-06
ENSRNOG00000000341	nidogen 2	NID2	1.028	0.244	Vascular
ENSRNOG00000000368	glutamate ionotropic receptor kainate type subunit 2	GRIK2	0.244	0.103
ENSRNOG00000000383	myopalladin	MYPN	1.135	3.44e-08	Bipolar
ENSRNOG00000000386	phenazine biosynthesis like protein domain containing	PBLD	-0.075	0.937
ENSRNOG00000000387			-0.339	0.000687
ENSRNOG00000000390			-0.351	0.53
ENSRNOG00000000392	Suv3 like RNA helicase	SUPV3L1	-0.485	2.75e-08	Bipolar
ENSRNOG00000000394	serglycin	Srgn	0.753	0.000164
ENSRNOG00000000395	kinesin family binding protein	KIFBP	-0.064	0.398
ENSRNOG00000000396	DExD-box helicase 50	DDX50	-0.271	0.00489
ENSRNOG00000000397	cell division cycle and apoptosis regulator 1	CCAR1	-0.462	3.65e-09
ENSRNOG00000000398	zinc finger containing ubiquitin peptidase 1	ZUP1	-0.705	9.23e-08
ENSRNOG00000000407	discoidin, CUB and LCCL domain containing 1	DCBLD1	0.39	0.0906	Amacrine
ENSRNOG00000000408	golgi associated PDZ and coiled-coil motif containing	Gopc	-0.056	0.552
ENSRNOG00000000411	NUS1 dehydrodolichyl diphosphate synthase subunit	NUS1	0.042	0.692
ENSRNOG00000000412	solute carrier family 35 member F1	SLC35F1	0.788	3.51e-21
ENSRNOG00000000414	centrosomal protein 85 like	CEP85L	-0.75	2.11e-05
ENSRNOG00000000415	anti-silencing function 1A histone chaperone	ASF1A	-0.367	0.00498	Bipolar
ENSRNOG00000000417	nuclear mitotic apparatus protein 1	NUMA1	-0.021	0.8	Bipolar
ENSRNOG00000000418			-0.335	0.022
ENSRNOG00000000419			0.904	0.153
ENSRNOG00000000420	negative elongation factor complex member E	Nelfe	0.024	0.863	Muller
ENSRNOG00000000421	SKI2 subunit of superkiller complex	SKIC2	-0.206	0.0231	Horizontal
ENSRNOG00000000422	decapping exoribonuclease	DXO	-0.017	0.933	Vascular
ENSRNOG00000000423			0.122	0.748
ENSRNOG00000000431	activating transcription factor 6 beta	ATF6B	-0.14	0.186
ENSRNOG00000000432	FKBP prolyl isomerase like	FKBPL	-0.573	0.000124	Muller
ENSRNOG00000000433	proline-rich transmembrane protein 1	Prrt1	0.426	0.000527	Bipolar
ENSRNOG00000000435	palmitoyl-protein thioesterase 2	PPT2	-0.051	0.611	Bipolar
ENSRNOG00000000436	EGF like domain multiple 8	EGFL8	0.008	0.973	Vascular
ENSRNOG00000000437	1-acylglycerol-3-phosphate O-acyltransferase 1	AGPAT1	0.424	2.47e-07
ENSRNOG00000000438	ring finger protein 5	RNF5	-0.224	0.0406	Muller
ENSRNOG00000000439	advanced glycosylation end-product specific receptor	AGER	-0.58	0.146
ENSRNOG00000000440	PBX homeobox 2	PBX2	0.462	1.09e-08	Muller
ENSRNOG00000000441	G protein signaling modulator 3	GPSM3	0.93	0.000244	Microglia
ENSRNOG00000000442	notch receptor 4	NOTCH4	-0.007	0.974	Vascular
ENSRNOG00000000443			1.568	8.05e-11
ENSRNOG00000000451	major histocompatibility complex, class II, DQ alpha 1	HLA-DQA1	-0.111	0.91	Microglia
ENSRNOG00000000454	major histocompatibility complex, class II, DO beta	HLA-DOB	0.145	0.886
ENSRNOG00000000455	transporter 2, ATP binding cassette subfamily B member	TAP2	-1.815	0.144
ENSRNOG00000000456	proteasome 20S subunit beta 8	PSMB8	1.314	7.16e-06
ENSRNOG00000000457	transporter 1, ATP binding cassette subfamily B member	TAP1	0.387	0.368
ENSRNOG00000000459	proteasome 20S subunit beta 9	PSMB9	0.253	0.609
ENSRNOG00000000461	bromodomain containing 2	BRD2	-0.558	0.398
ENSRNOG00000000463	collagen type XI alpha 2 chain	COL11A2	0.032	0.91	Muller
ENSRNOG00000000464	retinoid X receptor beta	RXRB	-0.205	0.0763
ENSRNOG00000000465	solute carrier family 39 member 7	SLC39A7	0.185	0.0264	Microglia
ENSRNOG00000000466	hydroxysteroid 17-beta dehydrogenase 8	HSD17B8	0.132	0.257	Muller
ENSRNOG00000000467	ring finger protein 1	RING1	0.061	0.584	Bipolar
ENSRNOG00000000470	VPS52 subunit of GARP complex	VPS52	0.001	0.99	Bipolar
ENSRNOG00000000471	beta-1,3-galactosyltransferase 4	B3GALT4	-0.595	0.00371
ENSRNOG00000000473	prefoldin subunit 6	PFDN6	-0.006	0.96	Muller
ENSRNOG00000000474	ral guanine nucleotide dissociation stimulator like 2	RGL2	-0.117	0.257
ENSRNOG00000000476	zinc finger and BTB domain containing 22	ZBTB22	-0.656	1.34e-12
ENSRNOG00000000477	death domain associated protein	DAXX	-0.893	4.72e-19	Rods
ENSRNOG00000000478	AA926063gene	AA926063	-2.552	1.18e-64
ENSRNOG00000000479	kinesin family member C1	KIFC1	-0.689	0.0211
ENSRNOG00000000480	PHD finger protein 1	PHF1	0.052	0.611
ENSRNOG00000000481	cutA divalent cation tolerance homolog	CUTA	0.083	0.421
ENSRNOG00000000483	synaptic Ras GTPase activating protein 1	SYNGAP1	0.422	5.57e-05
ENSRNOG00000000485	BCL2 antagonist/killer 1	BAK1	0.447	0.0013
ENSRNOG00000000486	gametogenetin binding protein 1	Ggnbp1	0.814	0.0677
ENSRNOG00000000487	glutamate metabotropic receptor 4	GRM4	1.135	3.2e-14
ENSRNOG00000000488	high mobility group AT-hook 1	HMGA1	-0.252	0.0644
ENSRNOG00000000490	ribosomal protein S10	RPS10	0.186	0.133
ENSRNOG00000000493	U1 small nuclear ribonucleoprotein C	Snrpc	-0.216	0.0927	Amacrine
ENSRNOG00000000495	bridge-like lipid transfer protein family member 3A	BLTP3A	-0.462	6.88e-06
ENSRNOG00000000498	ankyrin repeat and sterile alpha motif domain containing 1A	ANKS1A	-0.571	1.44e-18
ENSRNOG00000000500	signal peptide, CUB domain and EGF like domain containing 3	SCUBE3	-0.683	8.02e-05	Horizontal
ENSRNOG00000000501	zinc finger protein 76	ZNF76	-0.127	0.198	Bipolar
ENSRNOG00000000502	DEF6 guanine nucleotide exchange factor	DEF6	-0.524	0.232	Microglia
ENSRNOG00000000503	peroxisome proliferator activated receptor delta	PPARD	-0.382	9.39e-05	Microglia
ENSRNOG00000000504	FA complementation group E	FANCE	-0.382	0.000156
ENSRNOG00000000506	TEA domain transcription factor 3	TEAD3	-0.134	0.27	Rods
ENSRNOG00000000507	TUB like protein 1	TULP1	-2.386	1.68e-193	Rods
ENSRNOG00000000511	SRSF protein kinase 1	SRPK1	-0.195	0.0275
ENSRNOG00000000512	solute carrier family 26 member 8	SLC26A8	0.41	0.0639	Amacrine
ENSRNOG00000000513	mitogen-activated protein kinase 14	MAPK14	-0.285	0.000207	Bipolar
ENSRNOG00000000515	mitogen-activated protein kinase 13	MAPK13	2.265	6.6e-05	Microglia
ENSRNOG00000000517	potassium channel tetramerization domain containing 20	KCTD20	0.077	0.53
ENSRNOG00000000519	serine/threonine kinase 38	Stk38	0.34	5.89e-05
ENSRNOG00000000520	serine and arginine rich splicing factor 3	SRSF3	-0.144	0.0754
ENSRNOG00000000521	cyclin dependent kinase inhibitor 1A	CDKN1A	0.135	0.434
ENSRNOG00000000522	copine 5	CPNE5	0.995	2.02e-26
ENSRNOG00000000523	peptidylprolyl isomerase like 1	PPIL1	-0.051	0.726	Bipolar
ENSRNOG00000000524	chromosome 6 open reading frame 89	C6orf89	-0.034	0.738
ENSRNOG00000000525	peptidase inhibitor 16	PI16	0.771	0.0204
ENSRNOG00000000527	mitochondrial carrier 1	MTCH1	0.251	0.0332
ENSRNOG00000000528	FYVE, RhoGEF and PH domain containing 2	FGD2	1.124	0.000207	Microglia
ENSRNOG00000000529	Pim-1 proto-oncogene, serine/threonine kinase	PIM1	-0.005	0.99
ENSRNOG00000000531			-0.194	0.31
ENSRNOG00000000532	cap methyltransferase 1	CMTR1	0.079	0.314
ENSRNOG00000000536	MAM domain containing glycosylphosphatidylinositol anchor 1	MDGA1	1.264	1.2e-15
ENSRNOG00000000540	BTB domain containing 9	BTBD9	0.001	0.993
ENSRNOG00000000541	glyoxalase I	GLO1	-0.025	0.775
ENSRNOG00000000542	dynein axonemal heavy chain 8	DNAH8	-0.141	0.568
ENSRNOG00000000543	fyn related Src family tyrosine kinase	FRK	0.623	0.613	Horizontal
ENSRNOG00000000546	5'-nucleotidase domain containing 1	NT5DC1	-0.418	0.001
ENSRNOG00000000547	TSPY like 4	TSPYL4	0.384	1.21e-10	Horizontal
ENSRNOG00000000549			0.06	0.431
ENSRNOG00000000551	family with sequence similarity 241 member B	FAM241B	-0.336	0.0128	Amacrine
ENSRNOG00000000552	collagen type XIII alpha 1 chain	COL13A1	0.434	0.077	Vascular
ENSRNOG00000000557	secretion associated Ras related GTPase 1A	SAR1A	-0.172	0.00375
ENSRNOG00000000559	neuropeptide FF receptor 1	NPFFR1	0.276	0.766	Muller
ENSRNOG00000000560	leucine rich repeat containing 20	LRRC20	0.991	5.5e-05
ENSRNOG00000000561	phosphatase domain containing paladin 1	PALD1	0.468	0.107	Microglia
ENSRNOG00000000563	ADAM metallopeptidase with thrombospondin type 1 motif 14	ADAMTS14	0.673	0.426
ENSRNOG00000000564	thymus, brain and testes associated	TBATA	-1.537	3.12e-26
ENSRNOG00000000565	sphingosine-1-phosphate lyase 1	SGPL1	-0.446	8.31e-09
ENSRNOG00000000566	pterin-4 alpha-carbinolamine dehydratase 1	PCBD1	-0.373	0.107	Muller
ENSRNOG00000000567	unc-5 netrin receptor B	UNC5B	0.771	2.7e-09
ENSRNOG00000000568	solute carrier family 29 member 3	SLC29A3	2.026	7.1e-24	Microglia
ENSRNOG00000000569	V-set immunoregulatory receptor	VSIR	2.032	9.74e-25
ENSRNOG00000000571	prosaposin	PSAP	0.64	6.06e-23
ENSRNOG00000000572	carbohydrate sulfotransferase 3	CHST3	0.989	3.59e-05	Muller
ENSRNOG00000000574			-1.999	0.0179
ENSRNOG00000000576	anaphase promoting complex subunit 16	ANAPC16	-0.813	2.82e-12	Rods
ENSRNOG00000000579	myristoylated alanine rich protein kinase C substrate	Marcks	0.213	0.0301	RGCs
ENSRNOG00000000580	calcium homeostasis modulator family member 4	CALHM4	-1.575	0.0403
ENSRNOG00000000581	cell division cycle 40	CDC40	-0.302	0.00147	Bipolar
ENSRNOG00000000582	D-aspartate oxidase	DDO	1.751	0.000251	Muller
ENSRNOG00000000583	cyclin dependent kinase 19	CDK19	-0.119	0.0959
ENSRNOG00000000585	adenosylmethionine decarboxylase 1	AMD1	-0.431	6.27e-13
ENSRNOG00000000586	general transcription factor IIIC subunit 6	GTF3C6	-0.207	0.0294	Muller
ENSRNOG00000000587	ribosome production factor 2 homolog	RPF2	-0.273	0.0556
ENSRNOG00000000588	solute carrier family 16 member 10	SLC16A10	-0.313	0.322
ENSRNOG00000000593	REV3 like, DNA directed polymerase zeta catalytic subunit	REV3L	-0.331	1.54e-05
ENSRNOG00000000595	TRAF3 interacting protein 2	TRAF3IP2	0.84	0.000133
ENSRNOG00000000596	FYN proto-oncogene, Src family tyrosine kinase	FYN	0.293	0.00051
ENSRNOG00000000597	cellular communication network factor 6	CCN6	-0.111	0.886
ENSRNOG00000000598	tubulin epsilon 1	TUBE1	-0.511	0.000102	Bipolar
ENSRNOG00000000599	laminin subunit alpha 4	LAMA4	0.466	0.00237	Vascular
ENSRNOG00000000604	histone deacetylase 2	HDAC2	-0.526	1.21e-15	Amacrine
ENSRNOG00000000605	heparan sulfate-glucosamine 3-sulfotransferase 5	HS3ST5	0.271	0.152
ENSRNOG00000000606	protocadherin related 15	PCDH15	-2.141	3.02e-101	Rods
ENSRNOG00000000609	inositol polyphosphate multikinase	IPMK	-0.897	5.37e-32	Rods
ENSRNOG00000000610	CDGSH iron sulfur domain 1	CISD1	-0.274	0.00605
ENSRNOG00000000611	ubiquitin conjugating enzyme E2 D1	UBE2D1	-0.149	0.369
ENSRNOG00000000613	transcription factor A, mitochondrial	TFAM	-0.007	0.962
ENSRNOG00000000614	BicC family RNA binding protein 1	BICC1	0.632	0.00863	Muller
ENSRNOG00000000618	MAM domain containing glycosylphosphatidylinositol anchor 2	MDGA2	0.224	0.0865
ENSRNOG00000000622			-0.122	0.205
ENSRNOG00000000632	cyclin dependent kinase 1	CDK1	-0.436	0.463	Vascular
ENSRNOG00000000633	Rho related BTB domain containing 1	RHOBTB1	-0.872	1.11e-07
ENSRNOG00000000634	ciliary associated calcium binding coiled-coil 1	CABCOCO1	0.503	0.365
ENSRNOG00000000635	AT-rich interaction domain 5B	ARID5B	0.521	1.85e-07
ENSRNOG00000000636	rhotekin 2	RTKN2	-1.839	9.19e-14
ENSRNOG00000000638	zinc finger protein 365	ZNF365	-0.753	1.34e-42
ENSRNOG00000000639			-0.124	0.52
ENSRNOG00000000640	early growth response 2	EGR2	0.858	0.411
ENSRNOG00000000641	nuclear receptor binding factor 2	NRBF2	-1.097	1.15e-17	Microglia
ENSRNOG00000000645	receptor accessory protein 3	REEP3	0.233	0.135	Vascular
ENSRNOG00000000648	jumonji domain containing 1C	JMJD1C	-0.455	3.87e-12
ENSRNOG00000000655	protein tyrosine phosphatase receptor type C	PTPRC	0.847	0.00491	Microglia
ENSRNOG00000000657	NIMA related kinase 7	NEK7	-0.191	0.25	Vascular
ENSRNOG00000000658	acetyl-CoA carboxylase beta	ACACB	0.971	0.0328	Vascular
ENSRNOG00000000661	HPS4 biogenesis of lysosomal organelles complex 3 subunit 2	HPS4	-0.127	0.292
ENSRNOG00000000662	SRR1 domain containing	SRRD	0.286	0.133	Amacrine
ENSRNOG00000000663	tuftelin interacting protein 11	TFIP11	0.008	0.946	Bipolar
ENSRNOG00000000664	tyrosylprotein sulfotransferase 2	TPST2	0.035	0.844
ENSRNOG00000000665	phosphatidylinositol transfer protein beta	PITPNB	0.018	0.841	Vascular
ENSRNOG00000000692	uracil DNA glycosylase	UNG	0.321	0.507
ENSRNOG00000000693	SV2 related protein	SVOP	-0.319	9.58e-05
ENSRNOG00000000695	slingshot protein phosphatase 1	SSH1	0.421	0.000193	Horizontal
ENSRNOG00000000697	coronin 1C	CORO1C	0.213	0.00591
ENSRNOG00000000699	selectin P ligand	SELPLG	1.241	0.000119	Microglia
ENSRNOG00000000700	transmembrane protein 119	TMEM119	0.389	0.27	Microglia
ENSRNOG00000000701	iron-sulfur cluster assembly enzyme	ISCU	0.436	5.69e-05	RGCs
ENSRNOG00000000702	spliceosome associated factor 3, U4/U6 recycling protein	SART3	-0.214	0.00651	Amacrine
ENSRNOG00000000704	chemerin chemokine-like receptor 1	CMKLR1	2.412	4.26e-06	Microglia
ENSRNOG00000000708	small G protein signaling modulator 1	SGSM1	0.924	6.49e-14	Amacrine
ENSRNOG00000000716	5-hydroxytryptamine receptor 1F	HTR1F	-2.63	5.45e-22	Muller
ENSRNOG00000000718	CGG triplet repeat binding protein 1	CGGBP1	0.139	0.223	Amacrine
ENSRNOG00000000720	similar to human chromosome 3 open reading frame 38	C11h3orf38/LOC100362724	0.058	0.825
ENSRNOG00000000723			-0.383	0.641
ENSRNOG00000000728	chloride intracellular channel 2	CLIC2	0.589	0.158
ENSRNOG00000000729	trimethyllysine hydroxylase, epsilon	TMLHE	0.451	0.0627
ENSRNOG00000000748			-0.608	0.345
ENSRNOG00000000763	major histocompatibility complex, class I, G	HLA-G	1.356	2.66e-08
ENSRNOG00000000774	gamma-aminobutyric acid type B receptor subunit 1	GABBR1	0.424	1.01e-10	Bipolar
ENSRNOG00000000775	myelin oligodendrocyte glycoprotein	MOG	0.063	0.803
ENSRNOG00000000777	major histocompatibility complex, class I, E	HLA-E	2.392	7.57e-08
ENSRNOG00000000778	RNA polymerase I subunit H, antisense	Polr1has	-0.695	1.4e-05
ENSRNOG00000000779	RNA polymerase I subunit H	POLR1H	-0.278	0.12
ENSRNOG00000000780	protein phosphatase 1 regulatory inhibitor subunit 11	PPP1R11	0.612	2.36e-09	Muller
ENSRNOG00000000781	ring finger protein 39	RNF39	0.153	0.46
ENSRNOG00000000785	tripartite motif containing 39	TRIM39	-0.62	4.82e-17	Muller
ENSRNOG00000000786	ribonuclease P/MRP subunit p21	RPP21	0.076	0.721	Bipolar
ENSRNOG00000000787			1.023	0.0458
ENSRNOG00000000795	histocompatibility 2, T region locus 22	H2-T22	0.099	0.855
ENSRNOG00000000796	RAN binding protein 2	Ranbp2	-0.559	9.09e-14	Rods
ENSRNOG00000000798	G protein nucleolar 1 (putative)	GNL1	0.261	0.00017	Bipolar
ENSRNOG00000000799	ATP binding cassette subfamily F member 1	ABCF1	-0.236	0.000523
ENSRNOG00000000800	mannosidase alpha class 1A member 1	MAN1A1	0.468	0.00566
ENSRNOG00000000801	MSL3 like 2	Msl3l2	0.507	0.00425
ENSRNOG00000000802	TBC1 domain family, member 32	Tbc1d32	-1.802	1.1e-37	Rods
ENSRNOG00000000804	mitochondrial ribosomal protein S18B	MRPS18B	0.231	0.0567	Bipolar
ENSRNOG00000000805	gap junction protein alpha 1	GJA1	1.954	0.235	Vascular
ENSRNOG00000000808	heat shock transcription factor 2	HSF2	-0.563	2.91e-08
ENSRNOG00000000809	alpha tubulin acetyltransferase 1	ATAT1	-0.004	0.974	Muller
ENSRNOG00000000811	cAMP-dependent protein kinase inhibitor beta	PKIB	0.832	0.123
ENSRNOG00000000812			-0.271	0.0255
ENSRNOG00000000815	sphingomyelin phosphodiesterase acid like 3A	SMPDL3A	-1.067	0.0305
ENSRNOG00000000816			-0.445	0.000586
ENSRNOG00000000818			-1.188	1.52e-18
ENSRNOG00000000823	GRIP and coiled-coil domain containing 2	GCC2	-0.604	7.23e-16
ENSRNOG00000000824	dermatan sulfate epimerase	DSE	1.008	0.0141	Microglia
ENSRNOG00000000826	flotillin 1	FLOT1	0.727	2.42e-23
ENSRNOG00000000827	immediate early response 3	IER3	0.939	5e-06	Muller
ENSRNOG00000000831	general transcription factor IIH subunit 4	GTF2H4	-0.524	2.93e-05
ENSRNOG00000000833	valyl-tRNA synthetase 2, mitochondrial	VARS2	0.107	0.285	Bipolar
ENSRNOG00000000839	NFKB inhibitor like 1	NFKBIL1	0.098	0.464
ENSRNOG00000000840	ATPase H+ transporting V1 subunit G2	ATP6V1G2	0.438	1.16e-06
ENSRNOG00000000841	DExD-box helicase 39B	DDX39B	-0.191	0.00809
ENSRNOG00000000842	DDAH family member 2, ADMA-independent	DDAH2	0.565	8.56e-07
ENSRNOG00000000844			0.725	0.0242
ENSRNOG00000000847	casein kinase 2 beta	CSNK2B	-0.339	0.0005	Amacrine
ENSRNOG00000000848	G-patch domain and ankyrin repeats 1	GPANK1	-0.411	0.000812	Amacrine
ENSRNOG00000000850	apolipoprotein M	APOM	0.075	0.862	Muller
ENSRNOG00000000851	BAG cochaperone 6	BAG6	-0.102	0.172
ENSRNOG00000000852	proline rich coiled-coil 2A	PRRC2A	0.335	2.77e-07	Bipolar
ENSRNOG00000000853	allograft inflammatory factor 1	AIF1	1.488	6.17e-10	Microglia
ENSRNOG00000000857	mutS homolog 5	MSH5	-1.43	0.000117	Rods
ENSRNOG00000000858	suppressor APC domain containing 1	SAPCD1	1.026	3.4e-07	Amacrine
ENSRNOG00000000860	von Willebrand factor A domain containing 7	VWA7	0.594	0.00657
ENSRNOG00000000861	Zic family member 3	Zic3	-0.567	0.155
ENSRNOG00000000866	RNA binding motif protein X-linked	RBMX	-0.214	0.0374	Bipolar
ENSRNOG00000000867	valyl-tRNA synthetase 1	VARS1	0.035	0.737
ENSRNOG00000000869	Rac/Cdc42 guanine nucleotide exchange factor 6	ARHGEF6	0.461	0.0479	Microglia
ENSRNOG00000000875	four and a half LIM domains 1	FHL1	0.106	0.396
ENSRNOG00000000878	solute carrier family 44 member 4	SLC44A4	1.677	0.000233	Muller
ENSRNOG00000000879	solute carrier family 9 member A6	SLC9A6	0.251	3.13e-05
ENSRNOG00000000881			-0.466	2.42e-08
ENSRNOG00000000885	activator of transcription and developmental regulator AUTS2	AUTS2	0.775	4.97e-11
ENSRNOG00000000886	calneuron 1	CALN1	0.456	0.0539	Amacrine
ENSRNOG00000000888	SBDS ribosome maturation factor	SBDS	0.057	0.58	Muller
ENSRNOG00000000889	predicted gene 1527	Gm1527/Gm6558	0.365	0.628
ENSRNOG00000000891	zinc finger protein 709-like	LOC102548389	0.33	0.0778
ENSRNOG00000000893	transmembrane protein 248	TMEM248	-0.071	0.698	Muller
ENSRNOG00000000894	FRY microtubule binding protein	FRY	0.95	6.21e-25
ENSRNOG00000000895	RAB guanine nucleotide exchange factor 1	RABGEF1	-1.827	4.16e-98	Rods
ENSRNOG00000000900	tyrosylprotein sulfotransferase 1	TPST1	-0.302	0.023	Muller
ENSRNOG00000000901	CGRP receptor component	CRCP	-0.877	3.36e-31	Amacrine
ENSRNOG00000000902	heat shock protein family H (Hsp110) member 1	HSPH1	0.131	0.235
ENSRNOG00000000903	argininosuccinate lyase	ASL	0.41	0.011
ENSRNOG00000000906	mesenteric estrogen dependent adipogenesis	MEDAG	-0.299	0.495	Vascular
ENSRNOG00000000907	arachidonate 5-lipoxygenase activating protein	ALOX5AP	1.4	0.00017	Microglia
ENSRNOG00000000909	ubiquitin specific peptidase like 1	USPL1	-0.296	0.00162	Bipolar
ENSRNOG00000000913	glucuronidase beta	GUSB	-0.196	0.23	Microglia
ENSRNOG00000000917	nuclear protein 2, transcriptional regulator	NUPR2	-0.647	0.00107
ENSRNOG00000000918	zinc finger BED-type containing 5	ZBED5	-0.684	0.00061	Bipolar
ENSRNOG00000000920	phosphorylase kinase catalytic subunit gamma 1	PHKG1	-0.497	0.348	Horizontal
ENSRNOG00000000921	ubiquitin like 3	UBL3	0.097	0.346
ENSRNOG00000000922	sulfatase modifying factor 2	SUMF2	-0.1	0.616
ENSRNOG00000000923	chaperonin containing TCP1 subunit 6A	CCT6A	-0.207	0.0229
ENSRNOG00000000924	solute carrier family 7 member 1	SLC7A1	0.028	0.884
ENSRNOG00000000925	phosphoserine phosphatase	PSPH	-0.243	0.144	Muller
ENSRNOG00000000926	mitochondrial ribosomal protein S17	MRPS17	-0.296	0.0615
ENSRNOG00000000931	splicing factor SWAP	SFSWAP	-0.279	0.000648	Bipolar
ENSRNOG00000000934	piwi like RNA-mediated gene silencing 1	PIWIL1	-1.699	0.0178	Rods
ENSRNOG00000000936	syntaxin 2	STX2	0.654	1.23e-07	Rods
ENSRNOG00000000937	solute carrier family 46 member 3	SLC46A3	-0.46	0.000667
ENSRNOG00000000938	RAN, member RAS oncogene family	RAN	0.135	0.0172	RGCs
ENSRNOG00000000940	Fms related receptor tyrosine kinase 1	Flt1	1.136	1.92e-24
ENSRNOG00000000942	poly(A) specific ribonuclease subunit PAN3	PAN3	-0.366	2.34e-06
ENSRNOG00000000954	RNA polymerase I and III subunit D	Polr1d	-0.131	0.247
ENSRNOG00000000955	ligand of numb-protein X 2	LNX2	-0.912	1.16e-05
ENSRNOG00000000956	RAS like family 11 member A	RASL11A	-1.679	8.95e-15	Vascular
ENSRNOG00000000957	ribosomal protein L21	RPL21	-0.227	0.00616
ENSRNOG00000000958			-0.075	0.87
ENSRNOG00000000961	glycosyltransferase 1 domain containing 1	GLT1D1	0.937	8.65e-10	Muller
ENSRNOG00000000962	solute carrier family 15 member 4	SLC15A4	-0.125	0.392	Muller
ENSRNOG00000000963	transmembrane protein 132C	TMEM132C	0.476	0.00282	Bipolar
ENSRNOG00000000967	acetoacetyl-CoA synthetase	AACS	-0.496	8.35e-12	RGCs
ENSRNOG00000000968	ring finger protein 6	RNF6	-0.136	0.139
ENSRNOG00000000974	zinc finger protein 358	ZNF358	-0.239	0.0566
ENSRNOG00000000975	mucolipin TRP cation channel 1	MCOLN1	0.199	0.00645	Amacrine
ENSRNOG00000000977	patatin like phospholipase domain containing 6	PNPLA6	0.231	0.00585	Horizontal
ENSRNOG00000000979			-0.097	0.66
ENSRNOG00000000981	scavenger receptor class B member 1	SCARB1	-1.175	2.41e-40
ENSRNOG00000000983	zinc finger protein 394	ZNF394	-0.215	0.111	Microglia
ENSRNOG00000000985	cleavage and polyadenylation specific factor 4	CPSF4	0.015	0.909	Muller
ENSRNOG00000000986	calmodulin regulated spectrin associated protein family member 3	CAMSAP3	-0.157	0.149	Bipolar
ENSRNOG00000000987	ATP5MF-PTCD1 readthrough	ATP5MF-PTCD1	-0.387	0.00904
ENSRNOG00000000988	XPA binding protein 2	XAB2	-0.14	0.147	Bipolar
ENSRNOG00000000989	BUD31 homolog	BUD31	-0.385	0.000147	Microglia
ENSRNOG00000000990	PDGFA associated protein 1	PDAP1	-0.002	0.987
ENSRNOG00000000991	actin related protein 2/3 complex subunit 1B	ARPC1B	-0.139	0.75
ENSRNOG00000000993	Purkinje cell protein 2	PCP2	0.909	3.78e-16	Bipolar
ENSRNOG00000000994	syntaxin binding protein 2	STXBP2	0.135	0.294	Microglia
ENSRNOG00000000996	actin related protein 2/3 complex subunit 1A	ARPC1A	0.098	0.234	RGCs
ENSRNOG00000000999	SMAD specific E3 ubiquitin protein ligase 1	SMURF1	0.092	0.39	Bipolar
ENSRNOG00000001003	trafficking protein particle complex subunit 5	TRAPPC5	-0.039	0.733
ENSRNOG00000001004	nuclear receptor corepressor 2	NCOR2	0.534	7.6e-10	Bipolar
ENSRNOG00000001005	Fc epsilon receptor II	FCER2	-0.221	0.812
ENSRNOG00000001006	neuronal pentraxin 2	NPTX2	0.498	8.15e-08	Bipolar
ENSRNOG00000001007	BAR/IMD domain containing adaptor protein 2 like 1	BAIAP2L1	-0.866	0.0021	Vascular
ENSRNOG00000001009	brain protein I3	BRI3	-0.545	0.00521
ENSRNOG00000001010	tectonin beta-propeller repeat containing 1	TECPR1	-0.617	3.45e-19
ENSRNOG00000001011			0.641	0.116
ENSRNOG00000001030	TSC22 domain family member 1	TSC22D1	-0.024	0.803
ENSRNOG00000001032	CCZ1 homolog, vacuolar protein trafficking and biogenesis associated	CCZ1/CCZ1B	-0.421	7.6e-06
ENSRNOG00000001033	nuclear FMR1 interacting protein 1	NUFIP1	-0.106	0.501	Muller
ENSRNOG00000001034	ecotropic viral integration site 5 like	Evi5l	0.022	0.83	Horizontal
ENSRNOG00000001035	general transcription factor IIH subunit 3	GTF2H3	-0.4	0.0124	Muller
ENSRNOG00000001036	radial spoke head 10 homolog B	RSPH10B/RSPH10B2	0.023	0.965
ENSRNOG00000001037	GPALPP motifs containing 1	GPALPP1	-0.175	0.174	Bipolar
ENSRNOG00000001039	eukaryotic translation initiation factor 2B subunit alpha	EIF2B1	-0.042	0.775	Muller
ENSRNOG00000001040	PMS1 homolog 2, mismatch repair system component	Pms2	-0.536	1.81e-10	Bipolar
ENSRNOG00000001043	DEAD-box helicase 55	DDX55	-0.461	0.00036	Amacrine
ENSRNOG00000001044	aminoacyl tRNA synthetase complex interacting multifunctional protein 2	AIMP2	0.065	0.654
ENSRNOG00000001047	mitogen-activated protein kinase kinase 7	MAP2K7	-0.297	0.000331	Bipolar
ENSRNOG00000001048	ankyrin repeat domain 61	ANKRD61	-0.18	0.389
ENSRNOG00000001049	tumor protein, translationally-controlled 1	TPT1	-0.094	0.289
ENSRNOG00000001050	eukaryotic translation initiation factor 2 alpha kinase 1	EIF2AK1	-0.084	0.338	Muller
ENSRNOG00000001052	solute carrier family 25 member 30	SLC25A30	1.368	6.86e-17	Microglia
ENSRNOG00000001053	transmembrane p24 trafficking protein 2	TMED2	-0.151	0.0541
ENSRNOG00000001055	Rab interacting lysosomal protein like 1	RILPL1	0.224	0.115
ENSRNOG00000001056	small nuclear RNA activating complex polypeptide 2	SNAPC2	0.535	0.000172	Amacrine
ENSRNOG00000001057			-0.216	0.342
ENSRNOG00000001058	translocase of inner mitochondrial membrane 44	TIMM44	-0.356	9.52e-05	Rods
ENSRNOG00000001059	ubiquitin specific peptidase 42	USP42	-0.032	0.752	Bipolar
ENSRNOG00000001060	small nuclear ribonucleoprotein U11/U12 subunit 35	SNRNP35	-0.084	0.523
ENSRNOG00000001061	Rab interacting lysosomal protein like 2	RILPL2	0.044	0.845	Microglia
ENSRNOG00000001062			0.011	0.947
ENSRNOG00000001064	strawberry notch homolog 1	SBNO1	-0.268	6.96e-06
ENSRNOG00000001065	cytohesin 3	CYTH3	0.367	5.57e-07
ENSRNOG00000001068	Rac family small GTPase 1	RAC1	0.434	0.000617
ENSRNOG00000001069	ELAV like RNA binding protein 1	ELAVL1	-0.22	0.0999
ENSRNOG00000001070	cyclin dependent kinase 2 associated protein 1	CDK2AP1	-0.049	0.768	Muller
ENSRNOG00000001072	ceramide synthase 4	CERS4	-1.29	3.27e-130	Muller
ENSRNOG00000001073	mitochondrial translation release factor in rescue	MTRFR	0.081	0.736
ENSRNOG00000001074	M-phase phosphoprotein 9	MPHOSPH9	-0.34	0.00139	Bipolar
ENSRNOG00000001079	diacylglycerol lipase beta	DAGLB	-0.521	8.45e-06	Microglia
ENSRNOG00000001080	ADP ribosylation factor like GTPase 6 interacting protein 4	ARL6IP4	0.101	0.465	Horizontal
ENSRNOG00000001081	2-oxoglutarate and iron dependent oxygenase domain containing 2	OGFOD2	-0.233	0.3	Muller
ENSRNOG00000001082	ATP binding cassette subfamily B member 9	ABCB9	0.413	0.00071	Muller
ENSRNOG00000001083	KDEL endoplasmic reticulum protein retention receptor 2	KDELR2	-0.468	5.84e-08	Microglia
ENSRNOG00000001086	VPS37B subunit of ESCRT-I	VPS37B	-0.301	0.000499
ENSRNOG00000001088	replication factor C subunit 3	RFC3	-0.228	0.0987	Bipolar
ENSRNOG00000001090	StAR related lipid transfer domain containing 13	STARD13	0.31	0.00754	Vascular
ENSRNOG00000001091	huntingtin interacting protein 1 related	HIP1R	0.244	0.0182	Amacrine
ENSRNOG00000001092	klotho	KL	0.776	0.000784	Bipolar
ENSRNOG00000001094	zinc finger protein 316	ZNF316	-0.147	0.281
ENSRNOG00000001098	PDS5 cohesin associated factor B	PDS5B	-0.026	0.674
ENSRNOG00000001099	RB associated KRAB zinc finger	RBAK	-0.588	0.000112
ENSRNOG00000001101	ring finger protein 216	RNF216	0.035	0.75	Muller
ENSRNOG00000001103	sidekick cell adhesion molecule 1	SDK1	0.801	1.08e-09
ENSRNOG00000001104	forkhead box K1	FOXK1	0.089	0.461
ENSRNOG00000001106	density regulated re-initiation and release factor	DENR	0.034	0.783
ENSRNOG00000001107			0.387	0.0461
ENSRNOG00000001108	NEDD4 binding protein 2 like 2	N4BP2L2	-0.461	1.82e-06
ENSRNOG00000001111	BRCA2 DNA repair associated	BRCA2	0.18	0.407	Microglia
ENSRNOG00000001113	monocyte to macrophage differentiation associated 2	MMD2	-0.006	0.961	Muller
ENSRNOG00000001114	WD repeat domain, phosphoinositide interacting 2	WIPI2	-0.16	0.0644	Amacrine
ENSRNOG00000001115	solute carrier family 29 member 4	SLC29A4	0.618	1.5e-06	Horizontal
ENSRNOG00000001117	F-box and leucine rich repeat protein 18	FBXL18	-0.043	0.907	Bipolar
ENSRNOG00000001120	mediator complex subunit 13L	MED13L	-1.027	4.7e-71
ENSRNOG00000001123	SREBF pathway regulator in golgi 1	SPRING1	0.079	0.522
ENSRNOG00000001124	ring finger protein, transmembrane 2	RNFT2	-0.076	0.554
ENSRNOG00000001126	F-box and WD repeat domain containing 8	FBXW8	-0.057	0.655	Bipolar
ENSRNOG00000001128	tescalcin	TESC	0.167	0.828	RGCs
ENSRNOG00000001129	F-box protein 21	FBXO21	0.171	0.0209
ENSRNOG00000001130	nitric oxide synthase 1	NOS1	0.801	2.04e-06
ENSRNOG00000001134	replication factor C subunit 5	RFC5	-0.266	0.0413	Muller
ENSRNOG00000001135	WD repeat and SOCS box containing 2	WSB2	0.335	1e-05
ENSRNOG00000001136	phosphatidylethanolamine binding protein 1	PEBP1	0.098	0.4
ENSRNOG00000001138	TAO kinase 3	TAOK3	-0.825	4.58e-30	Rods
ENSRNOG00000001139	SDS3 homolog, SIN3A corepressor complex component	SUDS3	-0.363	0.000396	Bipolar
ENSRNOG00000001141	serine/arginine repetitive matrix 4	Srrm4	-0.002	0.988
ENSRNOG00000001142	protein kinase AMP-activated non-catalytic subunit beta 1	PRKAB1	-0.477	6.09e-08	Rods
ENSRNOG00000001143	citron rho-interacting serine/threonine kinase	CIT	0.353	0.00167	Muller
ENSRNOG00000001148	ribosomal protein lateral stalk subunit P0	RPLP0	-0.562	2.85e-13	Rods
ENSRNOG00000001149	paxillin	PXN	-0.516	1.77e-07	Rods
ENSRNOG00000001151	sirtuin 4	SIRT4	-1.015	5.04e-09
ENSRNOG00000001153	phospholipase A2 group IB	PLA2G1B	-1.643	1.2e-08
ENSRNOG00000001156	musashi RNA binding protein 1	MSI1	-1.326	1.33e-84	Rods
ENSRNOG00000001158	ATP binding cassette subfamily G member 1	ABCG1	-0.197	0.00911	Rods
ENSRNOG00000001161			-0.157	0.193
ENSRNOG00000001163	serine and arginine rich splicing factor 9	SRSF9	-0.138	0.134
ENSRNOG00000001169	solute carrier family 37 member 1	SLC37A1	0.297	0.32	Muller
ENSRNOG00000001170	cytochrome c oxidase subunit 6A1	COX6A1	-0.163	0.157
ENSRNOG00000001171	coenzyme Q5, methyltransferase	COQ5	0.14	0.373	Amacrine
ENSRNOG00000001172	ring finger protein 10	RNF10	-0.361	1.76e-07
ENSRNOG00000001173	calcium binding protein 1	CABP1	0.844	3.69e-16
ENSRNOG00000001174	phosphodiesterase 9A	PDE9A	0.686	2.9e-12
ENSRNOG00000001177	acyl-CoA dehydrogenase short chain	ACADS	0.418	0.107	Microglia
ENSRNOG00000001178	signal peptide peptidase like 3	SPPL3	0.014	0.884	Muller
ENSRNOG00000001181	WD repeat domain 4	WDR4	0.034	0.886
ENSRNOG00000001182	NADH:ubiquinone oxidoreductase subunit V3	NDUFV3	0.178	0.143	Bipolar
ENSRNOG00000001183	HNF1 homeobox A	HNF1A	-0.151	0.915
ENSRNOG00000001184	PBX/knotted 1 homeobox 1	PKNOX1	-0.229	0.032
ENSRNOG00000001185	chromosome 12 open reading frame 43	C12orf43	-0.004	0.969
ENSRNOG00000001187	2'-5'-oligoadenylate synthetase like	OASL	-1.161	0.000236
ENSRNOG00000001189	salt inducible kinase 1	Sik1	0.974	1.01e-08
ENSRNOG00000001190	GIT ArfGAP 2	GIT2	0.104	0.252	Microglia
ENSRNOG00000001191	trichoplein keratin filament binding	TCHP	-0.153	0.116	Bipolar
ENSRNOG00000001192	glycolipid transfer protein	GLTP	1.271	6.33e-16
ENSRNOG00000001193	heat shock transcription factor 2 binding protein	HSF2BP	-0.865	0.295	Muller
ENSRNOG00000001194	ribosomal RNA processing 1B	RRP1B	-2.016	2.52e-277	Rods
ENSRNOG00000001195	transient receptor potential cation channel subfamily V member 4	TRPV4	0.893	0.0475
ENSRNOG00000001198	family with sequence similarity 222 member A	FAM222A	-0.96	1.31e-17	Rods
ENSRNOG00000001199	POP5 homolog, ribonuclease P/MRP subunit	POP5	-0.126	0.441
ENSRNOG00000001201	cystatin B	CSTB	0.067	0.703
ENSRNOG00000001203	ribosomal RNA processing 1	RRP1	0.032	0.805	Bipolar
ENSRNOG00000001204	ankyrin repeat domain 13A	ANKRD13A	0.369	0.000257	Microglia
ENSRNOG00000001205	1-acylglycerol-3-phosphate O-acyltransferase 3	AGPAT3	-2.148	6.19e-238	Rods
ENSRNOG00000001210	PWP2 periodic tryptophan protein homolog (yeast)	Pwp2	0.196	0.0379	Bipolar
ENSRNOG00000001211	glutamine amidotransferase class 1 domain containing 3	GATD3/LOC102724023	0.17	0.0552
ENSRNOG00000001214	phosphofructokinase, liver type	PFKL	-0.293	0.00109
ENSRNOG00000001215	cilia and flagella associated protein 410	CFAP410	-0.186	0.153
ENSRNOG00000001216	transient receptor potential cation channel subfamily M member 2	TRPM2	-0.931	3.25e-24
ENSRNOG00000001217	leucine rich repeat containing 3	LRRC3	-0.521	0.287
ENSRNOG00000001219	thrombospondin-type laminin G domain and EAR repeats	Tspear	0.417	0.54	Rods
ENSRNOG00000001222	ubiquitin conjugating enzyme E2 G2	UBE2G2	-0.074	0.434	Bipolar
ENSRNOG00000001223	PTTG1 interacting protein	PTTG1IP	0.246	0.0301
ENSRNOG00000001224	integrin subunit beta 2	ITGB2	1.623	2.97e-13	Microglia
ENSRNOG00000001225	SLX9 ribosome biogenesis factor	SLX9	-0.139	0.261
ENSRNOG00000001227	adenosine deaminase RNA specific B1	ADARB1	0.82	9.76e-31
ENSRNOG00000001228	protein O-fucosyltransferase 2	POFUT2	0.153	0.164	Muller
ENSRNOG00000001229	collagen type XVIII alpha 1 chain	COL18A1	1.163	0.00186
ENSRNOG00000001232	solute carrier family 19 member 1	SLC19A1	-0.185	0.323	Vascular
ENSRNOG00000001235	G protein subunit alpha 12	GNA12	0.794	2.23e-14
ENSRNOG00000001236	BRCA1 associated ATM activator 1	BRAT1	-0.213	0.0137
ENSRNOG00000001237	calcineurin binding protein 1	CABIN1	-0.171	0.0388
ENSRNOG00000001238	arginine/serine-rich coiled-coil 2	Rsrc2	-0.596	4.13e-16	Rods
ENSRNOG00000001239			0.661	1.47e-09
ENSRNOG00000001241	IQ motif containing E	IQCE	0.335	0.00735	Rods
ENSRNOG00000001242	glutathione S-transferase, theta 3	Gstt3	0.517	0.00378
ENSRNOG00000001243	zinc finger CCHC-type containing 8	Zcchc8	-0.58	3.38e-09	Microglia
ENSRNOG00000001245	poly(rC) binding protein 3	PCBP3	0.285	2.33e-05
ENSRNOG00000001247	CAP-GLY domain containing linker protein 1	Clip1	-0.285	4.95e-06
ENSRNOG00000001249	collagen type VI alpha 1 chain	COL6A1	-0.194	0.42
ENSRNOG00000001250	LFNG O-fucosylpeptide 3-beta-N-acetylglucosaminyltransferase	LFNG	1.554	6.02e-26	Muller
ENSRNOG00000001251	galectin-related inter-fiber protein	Grifin	2.168	0.2
ENSRNOG00000001252	carbohydrate sulfotransferase 12	CHST12	0.527	0.00482
ENSRNOG00000001253	eukaryotic translation initiation factor 3 subunit B	EIF3B	0.01	0.932
ENSRNOG00000001254	collagen type VI alpha 2 chain	COL6A2	0.3	0.657	Vascular
ENSRNOG00000001255	MLX interacting protein	MLXIP	0.788	2.95e-10
ENSRNOG00000001256	ataxin 2	ATXN2	-0.121	0.124
ENSRNOG00000001258	sorting nexin 8	SNX8	-0.142	0.286	Horizontal
ENSRNOG00000001259	cut like homeobox 2	CUX2	0.878	3.02e-16
ENSRNOG00000001260	nudix hydrolase 1	NUDT1	-0.392	0.341	Microglia
ENSRNOG00000001261	formimidoyltransferase cyclodeaminase	FTCD	0.658	0.116	Horizontal
ENSRNOG00000001265	mitotic arrest deficient 1 like 1	MAD1L1	-0.24	0.0785	RGCs
ENSRNOG00000001269	protein phosphatase 1 catalytic subunit gamma	Ppp1cc	-0.659	2.31e-45
ENSRNOG00000001270	hydrogen voltage gated channel 1	HVCN1	-0.474	0.215	Microglia
ENSRNOG00000001271	caspase recruitment domain family member 6	CARD6	0.706	0.0264
ENSRNOG00000001272	minichromosome maintenance complex component 3 associated protein	MCM3AP	-0.272	2.54e-05	Bipolar
ENSRNOG00000001273	proteasome assembly chaperone 3	PSMG3	-0.286	0.289
ENSRNOG00000001274	VPS29 retromer complex component	VPS29	0.066	0.505	Amacrine
ENSRNOG00000001275	transmembrane protein 184A	TMEM184A	-2.085	0.0639
ENSRNOG00000001276	pericentrin	PCNT	0.077	0.463
ENSRNOG00000001277			0.534	0.000647
ENSRNOG00000001278	GPN-loop GTPase 3	GPN3	-0.115	0.378	Microglia
ENSRNOG00000001283	anaphase promoting complex subunit 7	ANAPC7	0.03	0.781
ENSRNOG00000001285	ATPase sarcoplasmic/endoplasmic reticulum Ca2+ transporting 2	ATP2A2	-0.042	0.587
ENSRNOG00000001287	G protein-coupled estrogen receptor 1	GPER1	0.727	0.201	Vascular
ENSRNOG00000001288	G protein-coupled receptor 146	GPR146	-0.07	0.703
ENSRNOG00000001289	chromosome 7 open reading frame 50	C7orf50	-0.077	0.646	Amacrine
ENSRNOG00000001293	guided entry of tail-anchored proteins factor 4	GET4	-0.336	3.24e-05	Horizontal
ENSRNOG00000001294	intraflagellar transport 81	IFT81	-1.059	2.67e-38
ENSRNOG00000001295	S100 calcium binding protein B	S100B	1.258	3.3e-32	RGCs
ENSRNOG00000001296	purinergic receptor P2X 7	P2rx7	1.886	5.56e-07	Microglia
ENSRNOG00000001297	protein arginine methyltransferase 2	PRMT2	0.837	6.25e-17
ENSRNOG00000001299	Sad1 and UNC84 domain containing 1	SUN1	-0.078	0.199
ENSRNOG00000001300	purinergic receptor P2X 4	P2RX4	0.996	1.19e-09	Microglia
ENSRNOG00000001302	adenosine A2a receptor	ADORA2A	0.394	0.142	Vascular
ENSRNOG00000001303	sperm antigen with calponin homology and coiled-coil domains 1 like	SPECC1L	-0.323	0.00129	Muller
ENSRNOG00000001304	BCR activator of RhoGEF and GTPase	BCR	0.628	5.6e-07	Bipolar
ENSRNOG00000001309	calcium/calmodulin dependent protein kinase kinase 2	CAMKK2	-0.133	0.325
ENSRNOG00000001311	RAB36, member RAS oncogene family	RAB36	0.625	9.29e-05
ENSRNOG00000001312	platelet derived growth factor subunit A	PDGFA	0.225	0.127
ENSRNOG00000001313	G protein subunit alpha z	GNAZ	-0.19	0.0492
ENSRNOG00000001314	FAM20C golgi associated secretory pathway kinase	FAM20C	0.767	1.22e-07
ENSRNOG00000001315	radial spoke head 14 homolog	RSPH14	-3.264	0.00134
ENSRNOG00000001316	anaphase promoting complex subunit 5	ANAPC5	-0.006	0.946	Bipolar
ENSRNOG00000001317	zinc finger protein 68	Zfp68	-0.576	7.28e-12
ENSRNOG00000001323	zinc finger protein 613	ZNF613	-0.368	0.00127
ENSRNOG00000001324	acetylserotonin O-methyltransferase	ASMT	-0.531	0.00862
ENSRNOG00000001325	interleukin 3 receptor subunit alpha	IL3RA	0.224	0.18	Vascular
ENSRNOG00000001331	ring finger protein 34	RNF34	-0.191	0.0389	Bipolar
ENSRNOG00000001335	zinc finger with KRAB and SCAN domains 1	ZKSCAN1	0.037	0.78
ENSRNOG00000001336	ORAI calcium release-activated calcium modulator 1	ORAI1	-0.279	0.189
ENSRNOG00000001337	SET domain containing 1A, histone lysine methyltransferase	Setd1a	0.039	0.755
ENSRNOG00000001339			-0.044	0.762
ENSRNOG00000001341			-0.564	0.000517
ENSRNOG00000001342	cilia and flagella associated protein 251	CFAP251	0.525	2.32e-07
ENSRNOG00000001344			1.138	0.0126
ENSRNOG00000001345	MAPK activated protein kinase 5	MAPKAPK5	-0.433	2.58e-05	Bipolar
ENSRNOG00000001346	COP9 signalosome subunit 6	COPS6	0.061	0.479	Bipolar
ENSRNOG00000001347	a disintegrin and metallopeptidase domain 1a	Adam1a	0.202	0.12
ENSRNOG00000001348	endoplasmic reticulum protein 29	ERP29	0.274	0.0444
ENSRNOG00000001349	minichromosome maintenance complex component 7	MCM7	-0.251	0.0161
ENSRNOG00000001350	N-alpha-acetyltransferase 25, NatB auxiliary subunit	NAA25	-0.347	6.34e-05
ENSRNOG00000001351	TRAF-type zinc finger domain containing 1	TRAFD1	-0.38	8.78e-06
ENSRNOG00000001352	HECT domain E3 ubiquitin protein ligase 4	HECTD4	0.209	0.00116
ENSRNOG00000001353	adaptor related protein complex 4 subunit mu 1	AP4M1	-0.27	0.085	Rods
ENSRNOG00000001355	TATA-box binding protein associated factor 6	TAF6	-0.168	0.0491	Bipolar
ENSRNOG00000001357			-0.498	0.0145
ENSRNOG00000001360	STAG3 cohesin complex component	STAG3	-0.861	0.109	RGCs
ENSRNOG00000001367	glypican 2	GPC2	-1.994	5.12e-15
ENSRNOG00000001368	rabphilin 3A	RPH3A	0.705	4.56e-17	Bipolar
ENSRNOG00000001369	2'-5'-oligoadenylate synthetase 1	OAS1	2.805	2.41e-06
ENSRNOG00000001374	RAS protein activator like 1	RASAL1	0.609	0.0102
ENSRNOG00000001375	galactose-3-O-sulfotransferase 4	GAL3ST4	-0.235	0.568
ENSRNOG00000001376	thiol methyltransferase 1A	TMT1A	0.775	5.58e-21
ENSRNOG00000001377	DEAD-box helicase 54	DDX54	-0.061	0.637	Muller
ENSRNOG00000001378			-1.087	5.92e-05
ENSRNOG00000001379	CYP3A7-CYP3A51P readthrough	CYP3A7-CYP3A51P	0.835	0.00473
ENSRNOG00000001383	solute carrier family 8 member B1	SLC8B1	0.936	0.00574
ENSRNOG00000001385	phospholipase B domain containing 2	PLBD2	0.246	0.0777	RGCs
ENSRNOG00000001387	methylphosphate capping enzyme	Mepce	-0.672	0.389	Muller
ENSRNOG00000001388	serine dehydratase	SDS	0.201	0.64	Muller
ENSRNOG00000001389	insulin receptor substrate 3	Irs3	1.623	0.000687
ENSRNOG00000001391	serine dehydratase like	SDSL	0.92	0.000352	Muller
ENSRNOG00000001396	motile sperm domain containing 3	MOSPD3	0.318	0.0194
ENSRNOG00000001397	RNA binding motif protein 19	RBM19	0.321	0.00424	Bipolar
ENSRNOG00000001399	T-box transcription factor 5	TBX5	1.157	0.000527
ENSRNOG00000001402	leucine rich repeats and calponin homology domain containing 4	LRCH4	-0.024	0.853	Vascular
ENSRNOG00000001404	ArfGAP with FG repeats 2	Agfg2	0.867	4.24e-08	Bipolar
ENSRNOG00000001407	transferrin receptor 2	TFR2	0.456	0.00389
ENSRNOG00000001408	actin like 6B	ACTL6B	0.234	0.078	RGCs
ENSRNOG00000001409	G protein subunit beta 2	GNB2	0.55	2.33e-11
ENSRNOG00000001410	GRB10 interacting GYF protein 1	GIGYF1	0.072	0.495
ENSRNOG00000001414	serpin family E member 1	SERPINE1	1.072	0.142	Vascular
ENSRNOG00000001415	adaptor related protein complex 1 subunit sigma 1	AP1S1	0.676	1.45e-14	RGCs
ENSRNOG00000001416	VGF nerve growth factor inducible	VGF	1.115	1.14e-09
ENSRNOG00000001417	procollagen-lysine,2-oxoglutarate 5-dioxygenase 3	PLOD3	0.249	0.00998
ENSRNOG00000001418	zinc finger HIT-type containing 1	ZNHIT1	-0.015	0.927	Muller
ENSRNOG00000001419	claudin 15	CLDN15	0.421	0.025
ENSRNOG00000001420	fission, mitochondrial 1	FIS1	-0.128	0.182
ENSRNOG00000001424	cut like homeobox 1	CUX1	-0.03	0.805
ENSRNOG00000001425	SH2B adaptor protein 2	SH2B2	0.931	0.00123	Muller
ENSRNOG00000001426			-0.149	0.0511
ENSRNOG00000001427	ORAI calcium release-activated calcium modulator 2	ORAI2	0.697	2.2e-12	RGCs
ENSRNOG00000001428	alkB homolog 4, lysine demethylase	ALKBH4	-0.469	0.0121
ENSRNOG00000001429	leucine-rich repeats and WD repeat domain containing 1	Lrwd1	-0.41	0.000574	Bipolar
ENSRNOG00000001430	RNA polymerase II subunit J	POLR2J	0.085	0.666	Muller
ENSRNOG00000001431	RAS p21 protein activator 4	RASA4	1.012	1.92e-17	Bipolar
ENSRNOG00000001432	deltex E3 ubiquitin ligase 2	DTX2	0.014	0.946	Microglia
ENSRNOG00000001435	scavenger receptor cysteine rich family member with 4 domains	SSC4D	0.529	0.00532	Muller
ENSRNOG00000001436	tyrosine 3-monooxygenase/tryptophan 5-monooxygenase activation protein gamma	YWHAG	0.487	1.75e-23	RGCs
ENSRNOG00000001439	serine/arginine repetitive matrix 3	Srrm3	-0.068	0.473
ENSRNOG00000001440	malate dehydrogenase 2	MDH2	-0.28	0.000624
ENSRNOG00000001441	transmembrane protein 120A	TMEM120A	0.09	0.522
ENSRNOG00000001442	cytochrome p450 oxidoreductase	POR	0.871	8.53e-22	Muller
ENSRNOG00000001443	rhomboid domain containing 2	RHBDD2	0.189	0.0517	Muller
ENSRNOG00000001448	huntingtin interacting protein 1	HIP1	-0.445	7.31e-09
ENSRNOG00000001449	POM121 transmembrane nucleoporin	POM121/POM121C	-0.238	0.00143
ENSRNOG00000001450	NOP2/Sun RNA methyltransferase 5	NSUN5	-0.207	0.163	Microglia
ENSRNOG00000001452	frizzled class receptor 9	FZD9	0.1	0.805
ENSRNOG00000001453	bromodomain adjacent to zinc finger domain 1B	BAZ1B	-0.021	0.76
ENSRNOG00000001454	eukaryotic translation initiation factor 4H	EIF4H	-0.244	0.000332
ENSRNOG00000001455	kinesin family member 13A	KIF13A	0.42	4.3e-11
ENSRNOG00000001456	nucleoporin 153	NUP153	-0.408	7.59e-10
ENSRNOG00000001457	replication factor C subunit 2	RFC2	-0.596	1.76e-05	Microglia
ENSRNOG00000001465	iduronate 2-sulfatase	IDS	0.151	0.0439
ENSRNOG00000001469	elastin	ELN	-0.408	0.0118	Muller
ENSRNOG00000001470	LIM domain kinase 1	LIMK1	0.362	0.000401
ENSRNOG00000001474	transmembrane protein 270	TMEM270	0.657	0.383
ENSRNOG00000001478	GTF2I repeat domain containing 1	GTF2IRD1	-0.755	3.44e-07
ENSRNOG00000001479	general transcription factor IIi	GTF2I	0.217	0.0014	Bipolar
ENSRNOG00000001480	neutrophil cytosolic factor 1	NCF1	1.201	2.04e-05	Microglia
ENSRNOG00000001482	GTF2I repeat domain containing 2	Gtf2ird2	0.526	2.35e-07
ENSRNOG00000001483	RCC1 like	RCC1L	0.028	0.867
ENSRNOG00000001484			0.237	0.138
ENSRNOG00000001488	proteasome 20S subunit beta 1	PSMB1	-0.336	0.000111	Bipolar
ENSRNOG00000001489	TATA-box binding protein	TBP	-0.234	0.111
ENSRNOG00000001490	programmed cell death 2	PDCD2	-0.285	0.0366
ENSRNOG00000001492	solute carrier family 8 member A2	SLC8A2	0.388	0.000169	Bipolar
ENSRNOG00000001493			-0.102	0.329
ENSRNOG00000001494	NSF attachment protein alpha	NAPA	-0.538	1.05e-16	Bipolar
ENSRNOG00000001499	MIA SH3 domain containing	MIA	-0.959	0.221
ENSRNOG00000001500	RAB4B, member RAS oncogene family	RAB4B	-0.166	0.0959	RGCs
ENSRNOG00000001501	small nuclear ribonucleoprotein polypeptide A	SNRPA	-0.191	0.177	Microglia
ENSRNOG00000001506	transmembrane protein 35A	TMEM35A	0.018	0.881	Bipolar
ENSRNOG00000001514	cell division cycle associated 7	CDCA7	-0.166	0.654	Muller
ENSRNOG00000001515	mitogen-activated protein kinase kinase kinase 20	MAP3K20	1.131	5.27e-11	Vascular
ENSRNOG00000001516	Rap guanine nucleotide exchange factor 4	RAPGEF4	0.388	0.000979	Vascular
ENSRNOG00000001517	pyruvate dehydrogenase kinase 1	PDK1	-0.156	0.288
ENSRNOG00000001518	integrin subunit alpha 6	ITGA6	1.154	8.81e-17	Amacrine
ENSRNOG00000001520	distal-less homeobox 1	DLX1	-0.002	0.999
ENSRNOG00000001524	histone acetyltransferase 1	HAT1	-0.344	9.32e-05	Muller
ENSRNOG00000001525	immunoglobulin superfamily member 11	IGSF11	-0.396	2.84e-05
ENSRNOG00000001527	CD80 molecule	CD80	-0.062	0.916
ENSRNOG00000001528	growth associated protein 43	GAP43	0.343	0.000352
ENSRNOG00000001531			-0.177	0.426
ENSRNOG00000001544	cysteine and tyrosine rich 1	CYYR1	1.025	4.1e-05	Vascular
ENSRNOG00000001547	alkylglycerone phosphate synthase	AGPS	-0.389	0.000264	Microglia
ENSRNOG00000001548	NFE2 like bZIP transcription factor 2	NFE2L2	0.267	0.0635
ENSRNOG00000001551	ATP synthase peripheral stalk subunit F6	ATP5PF	0.16	0.13
ENSRNOG00000001554	chromosome 21 open reading frame 91	C21orf91	-1.022	9.92e-22	Bipolar
ENSRNOG00000001555	BTG anti-proliferation factor 3	BTG3	-0.265	0.115
ENSRNOG00000001557	CXADR Ig-like cell adhesion molecule	CXADR	-0.66	8.08e-08
ENSRNOG00000001559	metaxin 2	MTX2	-0.294	0.0193
ENSRNOG00000001573	ubiquitin specific peptidase 25	USP25	-0.054	0.735
ENSRNOG00000001575	glutamate ionotropic receptor kainate type subunit 1	GRIK1	0.62	1.07e-11	Bipolar
ENSRNOG00000001582	BTB domain and CNC homolog 1	BACH1	-0.171	0.374
ENSRNOG00000001584	Map3k7 C-terminal like	Map3k7cl	-0.027	0.951	Vascular
ENSRNOG00000001585	nuclear receptor interacting protein 1	NRIP1	-0.63	1.95e-18
ENSRNOG00000001592	chaperonin containing TCP1 subunit 8	CCT8	0.071	0.301	RGCs
ENSRNOG00000001593	lunapark, ER junction formation factor	LNPK	-0.381	0.0125
ENSRNOG00000001596	ATP synthase membrane subunit c locus 3	ATP5MC3	-0.411	2.65e-08
ENSRNOG00000001597	activating transcription factor 2	ATF2	-0.169	0.111
ENSRNOG00000001598	ubiquitin specific peptidase 16	USP16	-0.478	2.81e-06	Bipolar
ENSRNOG00000001599	RWD domain containing 2B	RWDD2B	-0.064	0.666	Amacrine
ENSRNOG00000001602	listerin E3 ubiquitin protein ligase 1	LTN1	-0.455	2.64e-08	Muller
ENSRNOG00000001603	N-6 adenine-specific DNA methyltransferase 1	N6AMT1	0.041	0.833
ENSRNOG00000001607	ADAM metallopeptidase with thrombospondin type 1 motif 1	ADAMTS1	1.71	1.11e-14
ENSRNOG00000001608	neurexophilin and PC-esterase domain family member 3	NXPE3	0.533	0.000119	Horizontal
ENSRNOG00000001609	centrosomal protein 97	CEP97	-0.203	0.197	Muller
ENSRNOG00000001611	ribosomal protein L24	RPL24	-0.356	0.000119
ENSRNOG00000001613	zinc finger and BTB domain containing 11	ZBTB11	-0.228	0.0122	Amacrine
ENSRNOG00000001616	SUMO specific peptidase 7	SENP7	-1.132	6.93e-63
ENSRNOG00000001618	receptor interacting serine/threonine kinase 4	RIPK4	-1.587	2.04e-07	Rods
ENSRNOG00000001620	PR/SET domain 15	PRDM15	-0.038	0.806
ENSRNOG00000001621	C2 calcium dependent domain containing 2	C2CD2	-0.314	0.0321	Vascular
ENSRNOG00000001622	interphotoreceptor matrix proteoglycan 2	IMPG2	-1.701	1.41e-119
ENSRNOG00000001623	zinc finger and BTB domain containing 21	Zbtb21	-0.105	0.305
ENSRNOG00000001627	ABI family member 3 binding protein	Abi3bp	0.968	0.259	Muller
ENSRNOG00000001628	Purkinje cell protein 4	PCP4	0.182	0.0984
ENSRNOG00000001629	guided entry of tail-anchored proteins factor 1	GET1	-0.43	2.72e-09
ENSRNOG00000001632	bromodomain and WD repeat domain containing 1	BRWD1	-0.606	6.62e-16
ENSRNOG00000001633	trafficking from ER to golgi regulator	TFG	-0.106	0.389
ENSRNOG00000001640	translocase of outer mitochondrial membrane 70	TOMM70	-0.272	0.0002
ENSRNOG00000001642	TBC1 domain family member 23	TBC1D23	-0.334	0.00127
ENSRNOG00000001643	proteasome assembly chaperone 1	PSMG1	0.264	0.0139	Vascular
ENSRNOG00000001644	transmembrane protein 30C	Tmem30c	-0.218	0.797
ENSRNOG00000001645	filamin A interacting protein 1 like	FILIP1L	0.042	0.816
ENSRNOG00000001647	ETS proto-oncogene 2, transcription factor	ETS2	1.192	2.35e-19
ENSRNOG00000001652	ETS transcription factor ERG	ERG	-0.272	0.521	Vascular
ENSRNOG00000001653	ST3 beta-galactoside alpha-2,3-sialyltransferase 6	ST3GAL6	0.981	0.000132
ENSRNOG00000001654	coproporphyrinogen oxidase	CPOX	-0.688	2e-13	Muller
ENSRNOG00000001657	claudin domain containing 1	CLDND1	-0.297	0.0122	Muller
ENSRNOG00000001658	potassium inwardly rectifying channel subfamily J member 6	KCNJ6	0.616	0.000165
ENSRNOG00000001662	dual specificity tyrosine phosphorylation regulated kinase 1A	DYRK1A	-0.064	0.449
ENSRNOG00000001679	gamma-aminobutyric acid type A receptor subunit rho3	GABRR3	0.294	0.0746	Bipolar
ENSRNOG00000001680	ribosomal oxygenase 2	RIOX2	0.375	0.0507
ENSRNOG00000001681	VPS26 endosomal protein sorting factor C	VPS26C	-0.566	9.33e-08
ENSRNOG00000001682	tetratricopeptide repeat domain 3	TTC3	0.025	0.625
ENSRNOG00000001684	ripply transcriptional repressor 3	RIPPLY3	-0.788	0.0902
ENSRNOG00000001686	holocarboxylase synthetase	HLCS	0.407	0.0222	RGCs
ENSRNOG00000001687			-0.417	0.00245
ENSRNOG00000001689	ADP ribosylation factor like GTPase 6	ARL6	-1.684	4.12e-53	Rods
ENSRNOG00000001692	chromatin assembly factor 1 subunit B	CHAF1B	0.593	0.19
ENSRNOG00000001699	SET domain containing 4	SETD4	-0.111	0.403
ENSRNOG00000001700	whirlin	WHRN	-1.006	1.13e-35
ENSRNOG00000001701	carbonyl reductase 3	CBR3	0.829	0.272	RGCs
ENSRNOG00000001704	RUNX family transcription factor 1	RUNX1	0.874	0.132	Microglia
ENSRNOG00000001706	kalirin RhoGEF kinase	KALRN	0.23	0.0171
ENSRNOG00000001707	von Willebrand factor A domain containing 5B2	VWA5B2	0.695	1.14e-12
ENSRNOG00000001708	dishevelled segment polarity protein 3	DVL3	-0.161	0.0186	Muller
ENSRNOG00000001709	adaptor related protein complex 2 subunit mu 1	AP2M1	0.125	0.128	Amacrine
ENSRNOG00000001710	ATP binding cassette subfamily F member 3	ABCF3	-0.134	0.13	Bipolar
ENSRNOG00000001711	phospholipase A and acyltransferase 1	PLAAT1	0.703	0.31
ENSRNOG00000001712	ALG3 alpha-1,3- mannosyltransferase	ALG3	0.108	0.486
ENSRNOG00000001715	endothelin converting enzyme 2	ECE2	0.62	9.81e-09
ENSRNOG00000001717	OPA1 mitochondrial dynamin like GTPase	OPA1	-0.159	0.0462	Bipolar
ENSRNOG00000001719	proteasome 26S subunit ubiquitin receptor, non-ATPase 2	PSMD2	0.033	0.676	RGCs
ENSRNOG00000001720	hes family bHLH transcription factor 1	HES1	-0.172	0.741
ENSRNOG00000001724			-0.381	0.125
ENSRNOG00000001726	transmembrane protein 44	TMEM44	0.333	0.166	Vascular
ENSRNOG00000001727	large 60S subunit nuclear export GTPase 1	LSG1	-0.247	0.0362
ENSRNOG00000001728	family with sequence similarity 43 member A	FAM43A	0.741	0.000137	RGCs
ENSRNOG00000001729	xyloside xylosyltransferase 1	XXYLT1	-0.171	0.443
ENSRNOG00000001730	ArfGAP with coiled-coil, ankyrin repeat and PH domains 2	ACAP2	0.012	0.901
ENSRNOG00000001733	protein phosphatase 1 regulatory inhibitor subunit 2	PPP1R2	0.323	2.7e-05	Microglia
ENSRNOG00000001736	3-hydroxybutyrate dehydrogenase 1	BDH1	-0.304	0.0123
ENSRNOG00000001738	eukaryotic translation initiation factor 4 gamma 1	EIF4G1	0.221	0.0076
ENSRNOG00000001747	p21 (RAC1) activated kinase 2	PAK2	-0.313	0.102
ENSRNOG00000001750	chordin	CHRD	1.307	5.27e-11
ENSRNOG00000001752	negative regulator of reactive oxygen species	NRROS	0.482	0.193	Microglia
ENSRNOG00000001754	WD repeat domain 53	WDR53	-0.131	0.581
ENSRNOG00000001757	transmembrane 4 L six family member 19	TM4SF19	0.391	0.417
ENSRNOG00000001758	dynein light chain Tctex-type 2B	DYNLT2B	-0.567	4.74e-05
ENSRNOG00000001762	phosphate cytidylyltransferase 1A, choline	PCYT1A	-0.066	0.446
ENSRNOG00000001764	VPS8 subunit of CORVET complex	VPS8	0.117	0.209
ENSRNOG00000001766	transferrin receptor	TFRC	-0.302	0.000176
ENSRNOG00000001767			0.643	3.82e-08
ENSRNOG00000001769	tyrosine kinase non receptor 2	TNK2	0.087	0.457
ENSRNOG00000001770	enoyl-CoA hydratase and 3-hydroxyacyl CoA dehydrogenase	EHHADH	0.086	0.834
ENSRNOG00000001773	SUMO specific peptidase 2	SENP2	-0.096	0.321
ENSRNOG00000001774	leucine rich repeats and calponin homology domain containing 3	LRCH3	-0.313	1.33e-05
ENSRNOG00000001777			-0.556	0.596
ENSRNOG00000001781	leishmanolysin like peptidase	LMLN	-0.891	2.51e-20	RGCs
ENSRNOG00000001782	oxysterol binding protein like 11	OSBPL11	-0.288	0.0109	Microglia
ENSRNOG00000001783	transformer 2 beta homolog	TRA2B	-0.451	8.66e-09
ENSRNOG00000001785	ETS variant transcription factor 5	ETV5	1.022	2.1e-29	Muller
ENSRNOG00000001786	sorting nexin 4	SNX4	-0.11	0.287
ENSRNOG00000001789	zinc finger protein 148	ZNF148	-0.393	3.5e-06
ENSRNOG00000001792	solute carrier family 12 member 8	SLC12A8	0.562	0.549
ENSRNOG00000001793	heart development protein with EGF like domains 1	HEG1	-0.672	1.97e-08
ENSRNOG00000001795	integrin subunit beta 5	ITGB5	0.746	2.75e-07
ENSRNOG00000001796	diacylglycerol kinase gamma	DGKG	0.312	0.408	Muller
ENSRNOG00000001797	uridine monophosphate synthetase	UMPS	0.224	0.112
ENSRNOG00000001803	DnaJ heat shock protein family (Hsp40) member B11	DNAJB11	-0.179	0.0392
ENSRNOG00000001804	inositol 1,4,5-trisphosphate receptor type 2	ITPR2	0.938	0.00029
ENSRNOG00000001807	sarcospan	SSPN	0.664	0.206	Muller
ENSRNOG00000001808	integrator complex subunit 13	INTS13	-0.43	1.03e-06
ENSRNOG00000001811	FGFR1 oncogene partner 2	FGFR1OP2	-0.054	0.583
ENSRNOG00000001813	dynamin 1 like	DNM1L	-0.265	0.000564	RGCs
ENSRNOG00000001815	eukaryotic translation initiation factor 4A2	EIF4A2	0.068	0.243
ENSRNOG00000001816	replication factor C subunit 4	RFC4	-0.805	1.3e-09	Bipolar
ENSRNOG00000001817	transmembrane 7 superfamily member 3	TM7SF3	0.522	1.22e-08
ENSRNOG00000001820	mediator complex subunit 21	MED21	-0.084	0.672
ENSRNOG00000001823	ST6 beta-galactoside alpha-2,6-sialyltransferase 1	ST6GAL1	0.772	0.000895	Vascular
ENSRNOG00000001825	plakophilin 2	PKP2	-2.18	5.87e-136	Muller
ENSRNOG00000001827	mannan-binding lectin serine peptidase 1	Masp1	-0.458	0.538
ENSRNOG00000001828	serine/threonine kinase 38 like	STK38L	-0.171	0.0438	Microglia
ENSRNOG00000001829	ubiquitin conjugating enzyme E2 V2	UBE2V2	-0.071	0.552
ENSRNOG00000001830	basic helix-loop-helix ARNT like 2	BMAL2	2.133	0.00312	Microglia
ENSRNOG00000001833	minichromosome maintenance complex component 4	MCM4	-0.019	0.882
ENSRNOG00000001834			0.829	8.24e-13
ENSRNOG00000001837	somatostatin	SST	0.501	0.013
ENSRNOG00000001842	mitochondrial ribosomal protein S35	MRPS35	-0.097	0.573	Amacrine
ENSRNOG00000001843	BCL6 transcription repressor	BCL6	0.125	0.337	Muller
ENSRNOG00000001844	kelch like family member 42	KLHL42	0.224	0.12	Amacrine
ENSRNOG00000001845	DNA topoisomerase III beta	TOP3B	-0.006	0.956	Amacrine
ENSRNOG00000001847	coiled-coil domain containing 91	CCDC91	0.277	0.00668	Bipolar
ENSRNOG00000001849	mitogen-activated protein kinase 1	MAPK1	-0.501	2.35e-09
ENSRNOG00000001851	fatty acyl-CoA reductase 2	FAR2	-0.008	0.965
ENSRNOG00000001852	ERGIC and golgi 2	Ergic2	-0.124	0.302
ENSRNOG00000001854	transmembrane O-mannosyltransferase targeting cadherins 1	TMTC1	0.634	2.03e-05
ENSRNOG00000001858			-0.023	0.932
ENSRNOG00000001859	stromal cell derived factor 2 like 1	SDF2L1	0.462	0.0144	Microglia
ENSRNOG00000001861	YdjC chitooligosaccharide deacetylase homolog	YDJC	0.751	0.000777	Amacrine
ENSRNOG00000001862	ubiquitin-conjugating enzyme E2L 3	Ube2l3	0.221	0.00139
ENSRNOG00000001864	transmembrane protein 191	Tmem191	0.318	0.0762
ENSRNOG00000001865	serpin family D member 1	SERPIND1	-1.566	0.0234
ENSRNOG00000001867	synaptosome associated protein 29	SNAP29	-0.355	0.00016
ENSRNOG00000001868	CRK like proto-oncogene, adaptor protein	CRKL	-0.012	0.94	Muller
ENSRNOG00000001870	leucine zipper like post translational regulator 1	LZTR1	0.065	0.448	Amacrine
ENSRNOG00000001873	purinergic receptor P2X 6	P2RX6	0.726	0.00904	RGCs
ENSRNOG00000001874	solute carrier family 7 member 4	SLC7A4	0.452	0.0102	Muller
ENSRNOG00000001875	sphingomyelin phosphodiesterase 4	SMPD4	0.038	0.743
ENSRNOG00000001876	coiled-coil domain containing 74A	Ccdc74a	0.171	0.87	Muller
ENSRNOG00000001877	mediator complex subunit 15	MED15	-0.034	0.751	Bipolar
ENSRNOG00000001878	kelch like family member 22	KLHL22	-0.097	0.311
ENSRNOG00000001880	DiGeorge syndrome critical region gene 6	Dgcr6	0.295	0.0124
ENSRNOG00000001884	RAN binding protein 1	RANBP1	0.223	0.00365
ENSRNOG00000001885	tRNA methyltransferase 2 homolog A	TRMT2A	-0.246	0.063
ENSRNOG00000001886	DGCR8 microprocessor complex subunit	DGCR8	-0.302	0.00059	Rods
ENSRNOG00000001888	ARVCF delta catenin family member	ARVCF	0.291	0.0658	Muller
ENSRNOG00000001889	catechol-O-methyltransferase	COMT	0.196	0.213	Muller
ENSRNOG00000001890	thioredoxin reductase 2	TXNRD2	0.429	0.0043
ENSRNOG00000001891	G protein subunit beta 1 like	GNB1L	0.036	0.863	Bipolar
ENSRNOG00000001892	T-box transcription factor 1	TBX1	1.811	0.0277	Vascular
ENSRNOG00000001893	serine/threonine-protein phosphatase 2A catalytic subunit alpha-like	LOC100362453	0.21	0.676
ENSRNOG00000001908	kelch like family member 6	KLHL6	-0.672	0.0342	Microglia
ENSRNOG00000001911	MAP6 domain containing 1	MAP6D1	0.603	0.000249	RGCs
ENSRNOG00000001915	chondrolectin	CHODL	-0.759	0.00284
ENSRNOG00000001926	claudin 1	CLDN1	0.439	0.712	Muller
ENSRNOG00000001928	interleukin 1 receptor accessory protein	IL1RAP	0.531	0.00145	Vascular
ENSRNOG00000001930	coiled-coil domain containing 50	Ccdc50	-0.206	0.0829
ENSRNOG00000001931	fibroblast growth factor 12	FGF12	0.672	2.71e-12
ENSRNOG00000001953	beta-secretase 2	BACE2	0.877	0.236	Vascular
ENSRNOG00000001956	DAZ interacting zinc finger protein 3	DZIP3	-0.188	0.0661
ENSRNOG00000001958	intraflagellar transport 57	IFT57	0.01	0.946
ENSRNOG00000001959	MX dynamin-like GTPase 2	Mx2	2.909	3.6e-09	Microglia
ENSRNOG00000001960	sulfotransferase family 1D, member 1	Sult1d1	0.828	0.00229
ENSRNOG00000001963	MX dynamin like GTPase 1	MX1	2.149	8.86e-05
ENSRNOG00000001964	CD47 molecule	CD47	0.784	1.58e-12
ENSRNOG00000001971	BBX high mobility group box domain containing	BBX	0.007	0.973
ENSRNOG00000001976	transmembrane serine protease 2	TMPRSS2	0.301	0.762
ENSRNOG00000001979	regulator of calcineurin 1	Rcan1	0.317	0.00396
ENSRNOG00000001982	Cbl proto-oncogene B	CBLB	0.225	0.0281
ENSRNOG00000001989	activated leukocyte cell adhesion molecule	ALCAM	0.528	2.75e-07
ENSRNOG00000001990	UDP glucuronosyltransferase family 2 member B17	UGT2B17	0.282	0.716
ENSRNOG00000001991	ATP synthase peripheral stalk subunit OSCP	ATP5PO	-0.222	0.029
ENSRNOG00000001992	ATPase H+ transporting V1 subunit A	ATP6V1A	0.188	0.000186
ENSRNOG00000001996	YTH N6-methyladenosine RNA binding protein C1	YTHDC1	-0.414	9.81e-09	Bipolar
ENSRNOG00000002001	intersectin 1	ITSN1	0.264	0.00124
ENSRNOG00000002004	PR/SET domain 8	PRDM8	0.662	1.98e-10	Bipolar
ENSRNOG00000002012	DNA replication fork stabilization factor DONSON	DONSON	-0.175	0.256
ENSRNOG00000002013	SID1 transmembrane family member 1	SIDT1	0.623	0.00112	Microglia
ENSRNOG00000002014	signal transducing adaptor family member 1	STAP1	-0.065	0.937
ENSRNOG00000002021	SON DNA and RNA binding protein	SON	-0.609	1.22e-28
ENSRNOG00000002024	EPH receptor A5	EPHA5	0.484	9.75e-12
ENSRNOG00000002026	DnaJ heat shock protein family (Hsp40) member C28	DNAJC28	-0.257	0.206	Microglia
ENSRNOG00000002028	transmembrane protein 50B	TMEM50B	0.019	0.839	Cones
ENSRNOG00000002031	N-alpha-acetyltransferase 11, NatA catalytic subunit	NAA11	-1.628	0.22
ENSRNOG00000002032	interferon gamma receptor 2	IFNGR2	0.495	0.000679	Microglia
ENSRNOG00000002035	progestin and adipoQ receptor family member 3	PAQR3	0.473	8.25e-05
ENSRNOG00000002036	PAX3 and PAX7 binding protein 1	PAXBP1	-0.433	5.42e-09
ENSRNOG00000002039	ecotropic viral integration site 5	EVI5	0.066	0.441	Bipolar
ENSRNOG00000002040	BMP2 inducible kinase	BMP2K	0.143	0.267
ENSRNOG00000002041	BOC cell adhesion associated, oncogene regulated	BOC	1.277	0.000205	Muller
ENSRNOG00000002044	GTP binding protein 8 (putative)	GTPBP8	-0.434	0.00367	Bipolar
ENSRNOG00000002045	annexin A3	ANXA3	1.796	1.94e-42	Vascular
ENSRNOG00000002050	insulin like growth factor binding protein 7	IGFBP7	0.85	0.309
ENSRNOG00000002051	synaptojanin 1	SYNJ1	-0.817	7.74e-61	Amacrine
ENSRNOG00000002052	coiled-coil domain containing 80	CCDC80	0.682	0.396	Muller
ENSRNOG00000002053	Fraser extracellular matrix complex subunit 1	FRAS1	0.589	0.000326	Bipolar
ENSRNOG00000002054	glomulin, FKBP associated protein	GLMN	-1.028	5.47e-23	Rods
ENSRNOG00000002055	nitric oxide associated 1	NOA1	-0.074	0.598
ENSRNOG00000002057	solute carrier family 10 member 6	SLC10A6	1.207	0.0308
ENSRNOG00000002061	protein tyrosine phosphatase non-receptor type 13	PTPN13	0.872	6.66e-16	Rods
ENSRNOG00000002069	solute carrier family 35 member A5	SLC35A5	0.068	0.554	Muller
ENSRNOG00000002072	eva-1 homolog C	EVA1C	0.902	0.164
ENSRNOG00000002073	bromodomain testis associated	BRDT	-0.425	0.0708	Amacrine
ENSRNOG00000002074	RE1 silencing transcription factor	REST	0.693	5.64e-06
ENSRNOG00000002075	CCR4-NOT transcription complex subunit 6 like	CNOT6L	-0.343	0.00737
ENSRNOG00000002079	mitogen-activated protein kinase 10	MAPK10	0.656	7.83e-18
ENSRNOG00000002080	URB1 ribosome biogenesis homolog	URB1	0.062	0.536
ENSRNOG00000002089	cyclin G2	CCNG2	0.064	0.591
ENSRNOG00000002091	general transcription factor IIIC subunit 3	GTF3C3	-0.407	0.001
ENSRNOG00000002092	hormonally up-regulated Neu-associated kinase	HUNK	0.853	3.93e-09	Muller
ENSRNOG00000002093	transforming growth factor beta receptor 3	TGFBR3	1.403	2.99e-11	Vascular
ENSRNOG00000002094	autophagy related 3	ATG3	0.18	0.043	Vascular
ENSRNOG00000002097	RAS like family 11 member B	RASL11B	1.073	8.45e-06	Bipolar
ENSRNOG00000002100	signal recognition particle 72	SRP72	-0.046	0.593
ENSRNOG00000002101	phosphoribosylaminoimidazole carboxylase and phosphoribosylaminoimidazolesuccinocarboxamide synthase	PAICS	0.281	0.0115
ENSRNOG00000002104	SR-related CTD associated factor 4	SCAF4	-0.165	0.0927
ENSRNOG00000002105	cell division cycle 7	CDC7	0.571	0.000858	Rods
ENSRNOG00000002106	ubiquitin specific peptidase 46	USP46	0.508	7.49e-15
ENSRNOG00000002112	zinc finger protein 644	ZNF644	-0.288	9.84e-05
ENSRNOG00000002115	superoxide dismutase 1	SOD1	0.354	2.27e-06
ENSRNOG00000002117	BarH like homeobox 2	BARHL2	0.894	1.39e-14
ENSRNOG00000002121	leucine rich repeat containing 8 VRAC subunit D	LRRC8D	-0.575	1.11e-08
ENSRNOG00000002122			0.628	0.00153
ENSRNOG00000002125	cyclin I	CCNI	-0.268	0.000413	Amacrine
ENSRNOG00000002126	neural cell adhesion molecule 2	NCAM2	0.343	0.000121
ENSRNOG00000002127			1.58	0.0238
ENSRNOG00000002128	phosphoribosyl pyrophosphate amidotransferase	PPAT	0.28	0.0122
ENSRNOG00000002129	leucine rich repeat containing 8 VRAC subunit B	LRRC8B	-1.059	5.21e-38
ENSRNOG00000002130			-3.437	0.00305
ENSRNOG00000002134			-0.282	0.709
ENSRNOG00000002135	sarcoglycan beta	SGCB	-0.049	0.545	Bipolar
ENSRNOG00000002137	aminoadipate-semialdehyde dehydrogenase	AASDH	-0.424	1.82e-06	Bipolar
ENSRNOG00000002139	capping protein inhibiting regulator of actin	Cracd	-0.047	0.505
ENSRNOG00000002141	CD200 molecule	CD200	0.647	8.51e-16
ENSRNOG00000002142	CDP-diacylglycerol synthase 1	CDS1	-2.474	2.34e-211
ENSRNOG00000002144	exocyst complex component 1	Exoc1	-0.145	0.102	Bipolar
ENSRNOG00000002145	transmembrane serine protease 7	TMPRSS7	0.704	0.117
ENSRNOG00000002146	polycystin 2, transient receptor potential cation channel	PKD2	0.838	1.21e-14	Muller
ENSRNOG00000002149	NK6 homeobox 1	NKX6-1	0.33	0.745
ENSRNOG00000002152	defective in cullin neddylation 1 domain containing 4	DCUN1D4	0.326	0.000411
ENSRNOG00000002153	centrosomal protein 135	CEP135	-0.842	1.23e-10	Bipolar
ENSRNOG00000002159	glycerol-3-phosphate acyltransferase 3	GPAT3	0.488	0.156	Cones
ENSRNOG00000002161	toll like receptor 6	TLR6	1.315	0.0263	Microglia
ENSRNOG00000002163	KLF transcription factor 3	KLF3	0.529	1.61e-05
ENSRNOG00000002164	neuromedin U	NMU	0.728	0.0991	Muller
ENSRNOG00000002165	abraxas 1, BRCA1 A complex subunit	ABRAXAS1	-0.677	5.96e-05
ENSRNOG00000002167	dentin matrix acidic phosphoprotein 1	DMP1	2.152	0.0447
ENSRNOG00000002169	phosducin like 2	PDCL2	-0.75	0.0406
ENSRNOG00000002171	pleckstrin homology like domain family B member 2	PHLDB2	-0.367	0.277	Vascular
ENSRNOG00000002175	clock circadian regulator	CLOCK	-0.283	3.03e-07	Bipolar
ENSRNOG00000002176	nectin cell adhesion molecule 3	NECTIN3	0.264	0.385
ENSRNOG00000002177	glucosamine-6-phosphate deaminase 2	GNPDA2	-0.043	0.794
ENSRNOG00000002178	mitochondrial ribosomal protein S18C	MRPS18C	0.038	0.86
ENSRNOG00000002180	TBC1 domain family member 1	TBC1D1	0.757	4.63e-10
ENSRNOG00000002181	helicase, POLQ like	HELQ	-0.032	0.858
ENSRNOG00000002182	septin 11	SEPTIN11	0.509	3.8e-08
ENSRNOG00000002185	phosphoglucomutase 2	Pgm2	0.596	1.06e-06	Muller
ENSRNOG00000002186	nudix hydrolase 9	NUDT9	0.062	0.586
ENSRNOG00000002188	heparanase	HPSE	0.625	0.18	Microglia
ENSRNOG00000002191	chromosome 4 open reading frame 19	C4orf19	0.975	0.00132	Muller
ENSRNOG00000002192	RELT like 1	RELL1	-0.757	1.26e-05
ENSRNOG00000002194	coenzyme Q2, polyprenyltransferase	COQ2	-0.045	0.749
ENSRNOG00000002196	OCIA domain containing 2	OCIAD2	0.587	0.0271	Rods
ENSRNOG00000002199	transmembrane protein 165	TMEM165	-0.149	0.346	Muller
ENSRNOG00000002202	sosondowah ankyrin repeat domain family member B	SOWAHB	1.394	6.86e-14	Muller
ENSRNOG00000002203	lin-54 DREAM MuvB core complex component	LIN54	-0.367	0.00427	Bipolar
ENSRNOG00000002204	coiled-coil domain containing 158	CCDC158	-0.044	0.897	Muller
ENSRNOG00000002205	OCIA domain containing 1	OCIAD1	0.023	0.828
ENSRNOG00000002207	GTP binding elongation factor GUF1	GUF1	-0.375	0.000247
ENSRNOG00000002208	shroom family member 3	SHROOM3	-1.224	1.75e-36	Bipolar
ENSRNOG00000002210	hydroxysteroid 17-beta dehydrogenase 11	HSD17B11	-0.447	5.68e-08	Microglia
ENSRNOG00000002212	hydroxysteroid 17-beta dehydrogenase 13	HSD17B13	-0.342	0.208
ENSRNOG00000002214	kelch like family member 8	KLHL8	0.323	4.9e-05	Muller
ENSRNOG00000002215	myosin light chain kinase	MYLK	0.57	0.00308	Rods
ENSRNOG00000002216	steroid 5 alpha-reductase 3	SRD5A3	0.617	0.00509	Muller
ENSRNOG00000002217	placenta associated 8	PLAC8	-1.068	0.0411
ENSRNOG00000002218	starch binding domain 1	STBD1	1.329	0.00293
ENSRNOG00000002225	scavenger receptor class B member 2	SCARB2	0.283	0.00043	Bipolar
ENSRNOG00000002227	KIT proto-oncogene, receptor tyrosine kinase	KIT	0.562	2.42e-06
ENSRNOG00000002229	adenylate cyclase 5	ADCY5	0.575	2.19e-11
ENSRNOG00000002232	ALF transcription elongation factor 1	AFF1	0.559	3.2e-15	Muller
ENSRNOG00000002238	semaphorin 5B	SEMA5B	0.28	0.0776	Muller
ENSRNOG00000002240	solute carrier family 49 member 4	SLC49A4	0.243	0.0315
ENSRNOG00000002241	HSPB1 associated protein 1	HSPBAP1	-0.03	0.882	Cones
ENSRNOG00000002244	platelet derived growth factor receptor alpha	PDGFRA	0.957	0.0691	Muller
ENSRNOG00000002246	solute carrier family 30 member 9	SLC30A9	-0.159	0.0231
ENSRNOG00000002247	nucleoporin 54	NUP54	-0.265	0.0111
ENSRNOG00000002248	FRY like transcription coactivator	FRYL	-0.691	3.2e-16	Rods
ENSRNOG00000002251	SEC31 homolog A, COPII coat complex component	SEC31A	0.119	0.144	Bipolar
ENSRNOG00000002253	WD repeat domain 5B	WDR5B	-1.167	3.19e-10	Muller
ENSRNOG00000002254	transmembrane protein 33	TMEM33	0.143	0.201
ENSRNOG00000002255	family with sequence similarity 162 member A	FAM162A	-0.369	0.00122
ENSRNOG00000002256	ADP-ribosyltransferase 3 (inactive)	ART3	0.582	0.0259	Vascular
ENSRNOG00000002258	transmembrane protein 150C	TMEM150C	0.132	0.0945
ENSRNOG00000002262	enolase-phosphatase 1	ENOPH1	0.303	0.00193	Muller
ENSRNOG00000002266	GS homeobox 2	GSX2	1.454	0.437
ENSRNOG00000002267	cysteine rich hydrophobic domain 2	CHIC2	-0.078	0.636	Muller
ENSRNOG00000002270	heterogeneous nuclear ribonucleoprotein D-like	Hnrnpdl	0.115	0.134	Amacrine
ENSRNOG00000002271	SLAIN motif family member 2	SLAIN2	0.14	0.117
ENSRNOG00000002272	ligand of numb-protein X 1	LNX1	0.218	0.0102	RGCs
ENSRNOG00000002273	N-acylethanolamine acid amidase	NAAA	-0.545	2e-05	Rods
ENSRNOG00000002275	factor interacting with PAPOLA and CPSF1	FIP1L1	-0.328	5.32e-06
ENSRNOG00000002276	PHD finger protein 6	PHF6	-0.221	0.247	Muller
ENSRNOG00000002278	tec protein tyrosine kinase	TEC	0.633	0.0341
ENSRNOG00000002280			0.743	2.15e-08
ENSRNOG00000002291	bromodomain and WD repeat domain containing 3	BRWD3	-0.916	4.5e-14
ENSRNOG00000002292	heterogeneous nuclear ribonucleoprotein D	HNRNPD	0.178	0.00985
ENSRNOG00000002294	sorting nexin 29	SNX29	-0.46	9.2e-06
ENSRNOG00000002301	USO1 vesicle transport factor	USO1	0.101	0.157	Vascular
ENSRNOG00000002303	potassium inwardly rectifying channel subfamily J member 12	KCNJ12	0.474	0.15
ENSRNOG00000002305	solute carrier family 15 member 2	SLC15A2	0.247	0.68	Muller
ENSRNOG00000002309	H2.0 like homeobox	HLX	-0.296	0.713	Microglia
ENSRNOG00000002312	ATPase phospholipid transporting 10D (putative)	ATP10D	0.633	0.0551	Vascular
ENSRNOG00000002314			0.261	0.757
ENSRNOG00000002318	LIM and calponin homology domains 1	LIMCH1	0.232	0.00339	Muller
ENSRNOG00000002319	translin	TSN	0.185	0.00776	Muller
ENSRNOG00000002320	COMM domain containing 8	COMMD8	0.351	0.00128
ENSRNOG00000002322	chromosome 1 open reading frame 115	C1orf115	0.561	0.0528
ENSRNOG00000002323	charged multivesicular body protein 1B2	Chmp1b2	0.127	0.479
ENSRNOG00000002327	gamma-aminobutyric acid type A receptor subunit beta1	GABRB1	0.579	0.0703	Muller
ENSRNOG00000002331	aldehyde dehydrogenase 3 family member A1	ALDH3A1	0.672	0.227	Muller
ENSRNOG00000002332	motile sperm domain containing 1	MOSPD1	-0.312	0.294
ENSRNOG00000002336	gamma-aminobutyric acid type A receptor subunit alpha4	GABRA4	0.273	0.0506	Muller
ENSRNOG00000002338	diacylglycerol kinase epsilon	Dgke	-1.121	3.9e-47	Bipolar
ENSRNOG00000002339	microtubule affinity regulating kinase 1	MARK1	0.487	1.43e-06
ENSRNOG00000002341	tripartite motif containing 25	TRIM25	0.95	1.7e-05	Vascular
ENSRNOG00000002342	aldehyde dehydrogenase 3 family member A2	ALDH3A2	-0.056	0.518	Muller
ENSRNOG00000002343	ubiquitin C-terminal hydrolase L1	UCHL1	0.556	2.8e-16	RGCs
ENSRNOG00000002345	RasGEF domain family member 1B	RASGEF1B	0.612	2.31e-08
ENSRNOG00000002347	ral guanine nucleotide dissociation stimulator like 1	RGL1	0.577	1.59e-11
ENSRNOG00000002349	gamma-aminobutyric acid type A receptor subunit alpha2	GABRA2	0.171	0.152	Amacrine
ENSRNOG00000002352	tRNA splicing endonuclease subunit 15	Tsen15	0.503	0.00273
ENSRNOG00000002353	RAB3 GTPase activating non-catalytic protein subunit 2	RAB3GAP2	-0.156	0.0285	Muller
ENSRNOG00000002358	serine carboxypeptidase 1	SCPEP1	-0.183	0.346	Microglia
ENSRNOG00000002360	gamma-aminobutyric acid type A receptor subunit gamma1	GABRG1	0.262	0.327	Muller
ENSRNOG00000002361	protein kinase cGMP-dependent 2	PRKG2	0.154	0.673
ENSRNOG00000002364	ring finger protein 112	RNF112	0.82	1.2e-13	Muller
ENSRNOG00000002365	integral membrane protein 2A	ITM2A	0.016	0.933
ENSRNOG00000002368	isoleucyl-tRNA synthetase 2, mitochondrial	IARS2	0.104	0.353	Muller
ENSRNOG00000002369	regulator of G protein signaling 8	RGS8	0.637	4.54e-20	Bipolar
ENSRNOG00000002372	sarcoglycan delta	SGCD	0.82	0.388
ENSRNOG00000002373	A-kinase anchoring protein 1	AKAP1	-1.055	3.09e-44	Rods
ENSRNOG00000002376	cytoplasmic linker associated protein 1	CLASP1	-0.094	0.184	Horizontal
ENSRNOG00000002378	3'(2'), 5'-bisphosphate nucleotidase 1	BPNT1	-0.075	0.375	Bipolar
ENSRNOG00000002381	bone morphogenetic protein 3	BMP3	-0.067	0.873	Bipolar
ENSRNOG00000002385	proteoglycan 4	PRG4	0.246	0.728
ENSRNOG00000002387	transcription elongation factor A like 1	TCEAL1	0.222	0.0801
ENSRNOG00000002388	tripartite motif containing 41	TRIM41	0.22	0.00234
ENSRNOG00000002389	mortality factor 4 like 2	MORF4L2	-0.041	0.525
ENSRNOG00000002391	glycine receptor alpha 4 (pseudogene)	GLRA4	0.207	0.553
ENSRNOG00000002393	glutamyl-prolyl-tRNA synthetase 1	EPRS1	-0.374	1.74e-11
ENSRNOG00000002394	translocated promoter region, nuclear basket protein	TPR	-0.505	5.65e-23
ENSRNOG00000002397	solute carrier family 30 member 10	SLC30A10	0.531	2.22e-07	Vascular
ENSRNOG00000002403	niban apoptosis regulator 1	NIBAN1	2.072
ENSRNOG00000002407	pyridoxal dependent decarboxylase domain containing 1	PDXDC1	-0.418	0.000333	Amacrine
ENSRNOG00000002408	RNA binding motif protein 47	RBM47	0.92	0.22	Microglia
ENSRNOG00000002413	glypican 4	GPC4	0.693	0.0456
ENSRNOG00000002414	transcription factor CP2 like 1	TFCP2L1	1.347	0.00174	Muller
ENSRNOG00000002418	transforming growth factor beta 2	TGFB2	0.83	2.25e-12	Muller
ENSRNOG00000002419	proteolipid protein 1	PLP1	-0.368	0.0178	Muller
ENSRNOG00000002420	zinc finger CCCH-type containing 7A	ZC3H7A	-0.379	5.17e-07	Horizontal
ENSRNOG00000002423	family with sequence similarity 114, member A2	Fam114a2	-0.027	0.808	Muller
ENSRNOG00000002425	phosphatidylcholine transfer protein	PCTP	1.064	0.00018	Microglia
ENSRNOG00000002428	lysophosphatidic acid receptor 4	LPAR4	0.377	0.6	Muller
ENSRNOG00000002433	G3BP stress granule assembly factor 2	G3bp2	0.034	0.745
ENSRNOG00000002434	transmembrane protein 100	TMEM100	0.48	0.406
ENSRNOG00000002436	monocyte to macrophage differentiation associated	MMD	0.117	0.116
ENSRNOG00000002440	RAS like proto-oncogene B	RALB	0.491	9.68e-05
ENSRNOG00000002443	microfibril associated protein 3	MFAP3	-0.545	3.39e-05	Muller
ENSRNOG00000002449	MAGE family member D2	MAGED2	0.126	0.121
ENSRNOG00000002450	ribosomal RNA processing 15 homolog	RRP15	0.145	0.387
ENSRNOG00000002452	thioredoxin domain containing 11	TXNDC11	-0.122	0.322
ENSRNOG00000002454	ring finger protein 2	RNF2	-0.427	1.36e-07	Bipolar
ENSRNOG00000002456			0.98	2.62e-24
ENSRNOG00000002461	nidogen 1	NID1	0.654	0.608	Vascular
ENSRNOG00000002468	tenascin R	TNR	0.428	1.39e-07	Horizontal
ENSRNOG00000002469	tripartite motif containing 7	TRIM7	0.82	0.131	Amacrine
ENSRNOG00000002470	interferon gamma inducible protein 47	Ifi47	0.981	0.0869	Vascular
ENSRNOG00000002471	DNA polymerase theta	POLQ	0.245	0.63
ENSRNOG00000002473	odr-4 GPCR localization factor homolog	ODR4	-0.159	0.345
ENSRNOG00000002474	target of myb1 like 1 membrane trafficking protein	TOM1L1	0.16	0.394	Bipolar
ENSRNOG00000002475	similar to tumor protein, translationally-controlled 1	RGD1565798	-2.553	0.0174
ENSRNOG00000002478	insulin induced gene 2	INSIG2	0.174	0.198
ENSRNOG00000002480	G protein-coupled receptor 137B	Gpr137b	0.629	0.0124
ENSRNOG00000002488	polypeptide N-acetylgalactosaminyltransferase 10	GALNT10	-0.708	0.00402	Muller
ENSRNOG00000002496	syntaxin binding protein 5L	STXBP5L	-0.054	0.659
ENSRNOG00000002504	spermatogenesis associated 17	SPATA17	-1.237	0.0235	Rods
ENSRNOG00000002506	cyclin dependent kinase like 2	CDKL2	0.066	0.673
ENSRNOG00000002509	G protein nucleolar 3 like	GNL3L	0.201	0.000984
ENSRNOG00000002511	fms related receptor tyrosine kinase 4	FLT4	0.074	0.899	Vascular
ENSRNOG00000002512	G patch domain containing 2	Gpatch2	-0.238	0.134
ENSRNOG00000002514	coiled-coil domain containing 93	CCDC93	0.272	0.0442	Bipolar
ENSRNOG00000002516	myotubularin 1	MTM1	-0.08	0.378	Amacrine
ENSRNOG00000002517	phosducin	PDC	-2.801	7.64e-260	Rods
ENSRNOG00000002520	lipopolysaccharide induced TNF factor	LITAF	2.087	7.73e-32	Vascular
ENSRNOG00000002524	G protein-coupled receptor 37	GPR37	0.539	3.99e-11	Muller
ENSRNOG00000002525	prostaglandin-endoperoxide synthase 2	PTGS2	1.087	2.65e-08
ENSRNOG00000002529	RAP2C, member of RAS oncogene family	RAP2C	0.171	0.172	Microglia
ENSRNOG00000002536			-0.118	0.398
ENSRNOG00000002537	WNK lysine deficient protein kinase 3	WNK3	0.152	0.437	Muller
ENSRNOG00000002538	erythrocyte membrane protein band 4.1 like 5	Epb41l5	-0.897	5.64e-19
ENSRNOG00000002540	ras homolog family member H	RHOH	0.009	0.99	Microglia
ENSRNOG00000002541	PDS5 cohesin associated factor A	PDS5A	-0.435	6.55e-06
ENSRNOG00000002542	HEAT repeat containing 6	HEATR6	-0.377	0.000217	Bipolar
ENSRNOG00000002544	kinesin associated protein 3	KIFAP3	0.086	0.226	RGCs
ENSRNOG00000002545	HUWE1 associated protein modifying stress responses	HAPSTR1	-0.05	0.696
ENSRNOG00000002546	ring finger and CHY zinc finger domain containing 1	RCHY1	-0.162	0.197
ENSRNOG00000002548	tenascin N	TNN	1.476	0.117
ENSRNOG00000002549	5-hydroxytryptamine (serotonin) receptor 5B	Htr5b	1.168	0.127
ENSRNOG00000002553			0.939	8.39e-26
ENSRNOG00000002556			-0.145	0.584
ENSRNOG00000002563	MCTS1 re-initiation and release factor	MCTS1	-0.374	0.0333	Microglia
ENSRNOG00000002565	TATA-box binding protein associated factor 1	TAF1	-0.585	4.63e-17	Rods
ENSRNOG00000002568	suppressor of cytokine signaling 1	SOCS1	-0.556	0.187
ENSRNOG00000002569	mitochondrial ribosomal protein S14	MRPS14	0.103	0.415	Muller
ENSRNOG00000002572	calcyclin binding protein	CACYBP	0.035	0.692	Horizontal
ENSRNOG00000002574			-0.06	0.59
ENSRNOG00000002575	SAP30 like	SAP30L	-0.777	5.93e-08
ENSRNOG00000002579	prostate androgen-regulated mucin-like protein 1	PARM1	0.991	0.059
ENSRNOG00000002580	tRNA methyltransferase 1 like	TRMT1L	-0.177	0.145
ENSRNOG00000002585	cullin 4B	CUL4B	-0.166	0.141
ENSRNOG00000002592	ribosomal protein S6 kinase A6	RPS6KA6	-0.012	0.962	Bipolar
ENSRNOG00000002593	estrogen related receptor gamma	ESRRG	0.163	0.0476
ENSRNOG00000002595	dipeptidyl peptidase like 10	DPP10	0.206	0.254
ENSRNOG00000002599	GRB2 related adaptor protein	GRAP	-1.286	0.0798	Vascular
ENSRNOG00000002607	SRY-box transcription factor 9	SOX9	0.975	1.49e-11	Muller
ENSRNOG00000002609	endoplasmic reticulum oxidoreductase 1 beta	ERO1B	-0.096	0.436
ENSRNOG00000002610	calcium regulated heat stable protein 1	CARHSP1	1.87	3.62e-19	Vascular
ENSRNOG00000002612	DExD-box helicase 52	DDX52	-0.425	0.000291	Muller
ENSRNOG00000002615	phosphomannomutase 2	PMM2	-0.176	0.148
ENSRNOG00000002618	influenza virus NS1A binding protein	IVNS1ABP	-1.071	0.000712
ENSRNOG00000002625	protein tyrosine phosphatase non-receptor type 4	PTPN4	-0.255	0.000899
ENSRNOG00000002626	carbonic anhydrase 10	CA10	0.697	1.74e-13	Bipolar
ENSRNOG00000002627	potassium channel tetramerization domain containing 3	KCTD3	-0.456	4.71e-14	Bipolar
ENSRNOG00000002630	CCR4-NOT transcription complex subunit 8	CNOT8	-0.133	0.208
ENSRNOG00000002632	nascent polypeptide associated complex subunit alpha	NACA	-0.136	0.0711
ENSRNOG00000002635			0.15	0.454
ENSRNOG00000002636	4-aminobutyrate aminotransferase	ABAT	0.812	3.06e-27
ENSRNOG00000002642	prostaglandin E synthase 3	PTGES3	-0.132	0.116	Amacrine
ENSRNOG00000002643	UDP-glucose 6-dehydrogenase	UGDH	-1.196	6.02e-51
ENSRNOG00000002644	UTP18 small subunit processome component	UTP18	-0.452	3.21e-06
ENSRNOG00000002645	gem nuclear organelle associated protein 5	GEMIN5	-0.139	0.31	Muller
ENSRNOG00000002652	RAP1 GTPase activating protein 2	RAP1GAP2	0.695	1.53e-14	RGCs
ENSRNOG00000002653	potassium two pore domain channel subfamily K member 2	KCNK2	0.566	0.00041
ENSRNOG00000002657	phospholipase A2 group IVA	PLA2G4A	0.539	0.0102
ENSRNOG00000002659	class II major histocompatibility complex transactivator	CIITA	-2.465	1.66e-43	Microglia
ENSRNOG00000002660	MAGE family member E1	MAGEE1	0.69	1.63e-11
ENSRNOG00000002662	polysaccharide biosynthesis domain containing 1	PBDC1	-0.371	0.0158	Rods
ENSRNOG00000002664	epithelial membrane protein 2	EMP2	-0.229	0.631
ENSRNOG00000002667	laminin subunit gamma 2	LAMC2	-0.666	0.0337	Muller
ENSRNOG00000002669	clustered mitochondria homolog	CLUH	0.176	0.0305	Amacrine
ENSRNOG00000002671	NME/NM23 nucleoside diphosphate kinase 2	NME2	0.542	3.56e-10
ENSRNOG00000002680	laminin subunit gamma 1	LAMC1	0.541	0.0795
ENSRNOG00000002682	zinc finger protein 692	ZNF692	-0.449	2.27e-05	Bipolar
ENSRNOG00000002693	NME/NM23 nucleoside diphosphate kinase 1	NME1	0.149	0.0602	Bipolar
ENSRNOG00000002695	transcription factor B2, mitochondrial	TFB2M	0.034	0.877	Muller
ENSRNOG00000002697	myotubularin related protein 1	MTMR1	-0.077	0.562
ENSRNOG00000002705	vacuolar protein sorting 4 homolog B	VPS4B	0.222	0.0177	Microglia
ENSRNOG00000002708	PHD finger protein 8	PHF8	-0.754	1.49e-30	Bipolar
ENSRNOG00000002710	consortin, connexin sorting protein	CNST	-0.273	0.000966
ENSRNOG00000002711	NUF2 component of NDC80 kinetochore complex	NUF2	-0.226	0.626
ENSRNOG00000002713	zinc finger protein 672	ZNF672	-0.457	0.000103	Rods
ENSRNOG00000002714	methyltransferase 22, Kin17 lysine	METTL22	-0.087	0.515	Bipolar
ENSRNOG00000002721	NADH:ubiquinone oxidoreductase subunit B4	NDUFB4	-0.061	0.55	Bipolar
ENSRNOG00000002722	SEC14 like lipid binding 1	SEC14L1	0.613	2.02e-15	Amacrine
ENSRNOG00000002723	selectin E	SELE	0.596	0.363
ENSRNOG00000002724	phosphoribosyl pyrophosphate synthetase associated protein 2	PRPSAP2	-0.291	1.55e-05	Bipolar
ENSRNOG00000002728	betacellulin	BTC	-0.095	0.801	Muller
ENSRNOG00000002730	regulator of G protein signaling 5	RGS5	0.105	0.474	Vascular
ENSRNOG00000002734			0.127	0.669
ENSRNOG00000002735	DExH-box helicase 9	DHX9	-0.18	0.000638
ENSRNOG00000002736	RAB GTPase activating protein 1 like	RABGAP1L	0.183	0.36
ENSRNOG00000002746	follistatin like 1	FSTL1	0.714	0.152
ENSRNOG00000002748	coiled-coil domain containing 43	CCDC43	-0.316	0.0319	Bipolar
ENSRNOG00000002749	sperm associated antigen 9	SPAG9	-0.165	0.000904
ENSRNOG00000002750	ring finger and CCCH-type domains 1	Rc3h1	-0.328	0.00599	Muller
ENSRNOG00000002751	zinc finger DHHC-type palmitoyltransferase 15	ZDHHC15	0.334	0.224
ENSRNOG00000002753	ADAM metallopeptidase domain 11	ADAM11	0.44	3.36e-05
ENSRNOG00000002755	platelet activating factor acetylhydrolase 1b regulatory subunit 1	PAFAH1B1	0.208	0.000244	RGCs
ENSRNOG00000002757	transcriptional adaptor 2A	TADA2A	-0.272	0.0111
ENSRNOG00000002759	lipoic acid synthetase	LIAS	-0.1	0.503	Bipolar
ENSRNOG00000002763	unc-51 like autophagy activating kinase 2	ULK2	-0.013	0.911	Amacrine
ENSRNOG00000002764	methyltransferase 16, RNA N6-adenosine	Mettl16	-0.142	0.173
ENSRNOG00000002767	discs large MAGUK scaffold protein 3	DLG3	0.299	1.48e-05
ENSRNOG00000002773	regulator of G protein signaling 4	RGS4	-0.119	0.24
ENSRNOG00000002775	N-acetylneuraminate pyruvate lyase	NPL	0.459	0.0176	Microglia
ENSRNOG00000002778	apoptosis antagonizing transcription factor	AATF	-0.154	0.386	Muller
ENSRNOG00000002781	3-ketodihydrosphingosine reductase	KDSR	-0.408	0.000899	Muller
ENSRNOG00000002783	serpin family C member 1	SERPINC1	-0.553	4.7e-05
ENSRNOG00000002790	ATP binding cassette subfamily B member 7	ABCB7	-0.038	0.818
ENSRNOG00000002791			1.721	6.55e-06
ENSRNOG00000002793	somatostatin receptor 2	SSTR2	0.402	0.18	Vascular
ENSRNOG00000002795	component of oligomeric golgi complex 1	COG1	-0.45	1.61e-06
ENSRNOG00000002797	G protein-coupled receptor 156	GPR156	-0.319	0.583	Muller
ENSRNOG00000002800	glycerophosphodiester phosphodiesterase domain containing 2	GDPD2	1.244	6.6e-16	Muller
ENSRNOG00000002802	C-X-C motif chemokine ligand 2	CXCL2	2.691	0.0155
ENSRNOG00000002807	septin 9	SEPTIN9	0.995	5.06e-14
ENSRNOG00000002810	glutamine-fructose-6-phosphate transaminase 2	GFPT2	1.289	0.00164	Muller
ENSRNOG00000002811	BMP/retinoic acid inducible neural specific 3	BRINP3	0.128	0.762	Amacrine
ENSRNOG00000002812	LIM homeobox 1	LHX1	0.625	0.00873	Horizontal
ENSRNOG00000002813	aspartyl-tRNA synthetase 2, mitochondrial	DARS2	-0.278	0.0191
ENSRNOG00000002814			0.412	0.416
ENSRNOG00000002818	elongation factor Tu GTP binding domain containing 2	EFTUD2	0.034	0.703	Horizontal
ENSRNOG00000002821	PH domain and leucine rich repeat protein phosphatase 1	PHLPP1	0.371	5.35e-05	Muller
ENSRNOG00000002823	mitogen-activated protein kinase 9	MAPK9	-0.347	5.37e-07	Amacrine
ENSRNOG00000002824			0.166	0.555
ENSRNOG00000002826	hydroxysteroid 17-beta dehydrogenase 7	HSD17B7	0.102	0.612
ENSRNOG00000002827	RNA binding fox-1 homolog 1	RBFOX1	0.599	5.13e-11
ENSRNOG00000002828	transducer of ERBB2, 1	TOB1	-0.463	7.05e-13
ENSRNOG00000002831	WAP, follistatin/kazal, immunoglobulin, kunitz and netrin domain containing 2	WFIKKN2	2.657	4.04e-06	Muller
ENSRNOG00000002832	solute carrier family 16 member 2	SLC16A2	0.541	0.00494	Muller
ENSRNOG00000002833	glycogen synthase kinase 3 beta	GSK3B	0.165	0.063
ENSRNOG00000002835	LUC7 like 3 pre-mRNA splicing factor	LUC7L3	-0.677	4.77e-09
ENSRNOG00000002838			-0.396	0.00209
ENSRNOG00000002839	solute carrier family 19 member 2	SLC19A2	-0.02	0.891	Muller
ENSRNOG00000002840	ATP synthase F1 subunit beta	ATP5F1B	-0.505	7.3e-15
ENSRNOG00000002841	CDC42 binding protein kinase alpha	CDC42BPA	0.297	2.76e-07
ENSRNOG00000002844	ubiquitin specific peptidase 27 X-linked	USP27X	0.946	0.00143	Bipolar
ENSRNOG00000002848	monoamine oxidase A	MAOA	0.331	0.000411
ENSRNOG00000002851	VCP nuclear cofactor family member 1	VCF1	-0.347	0.000155
ENSRNOG00000002852	myosin XIX	MYO19	-0.034	0.847	Bipolar
ENSRNOG00000002855	replication factor C subunit 1	RFC1	-0.178	0.0773
ENSRNOG00000002860	coiled-coil domain containing 181	CCDC181	-1.133	2.7e-36
ENSRNOG00000002862	chloride voltage-gated channel 5	CLCN5	-0.275	0.0857
ENSRNOG00000002863	calcium voltage-gated channel subunit alpha1 E	CACNA1E	0.365	0.0136
ENSRNOG00000002864	nucleus accumbens associated 1	NACC1	0.27	0.00227	RGCs
ENSRNOG00000002866	Ras association domain family member 6	RASSF6	1.145	0.00269	Muller
ENSRNOG00000002871			-0.322	0.000158
ENSRNOG00000002874	RNA binding motif protein 25	Rbm25	-0.351	0.000138
ENSRNOG00000002875	kelch like family member 20	KLHL20	-0.552	5.69e-09
ENSRNOG00000002876	eukaryotic elongation factor 2 lysine methyltransferase	EEF2KMT	-0.524	0.0636
ENSRNOG00000002879	presenilin 2	PSEN2	-0.262	0.0176	RGCs
ENSRNOG00000002881	discoidin domain receptor tyrosine kinase 2	DDR2	0.922	0.225	Muller
ENSRNOG00000002882	zinc finger CCHC-type containing 2	ZCCHC2	-0.271	0.0148
ENSRNOG00000002883	ALG1, chitobiosyldiphosphodolichol beta-mannosyltransferase	Alg1	-0.196	0.123	Muller
ENSRNOG00000002884	basic leucine zipper nuclear factor 1	BLZF1	-0.543	1.62e-06	Horizontal
ENSRNOG00000002886	myosin heavy chain 10	MYH10	0.453	2.72e-10	RGCs
ENSRNOG00000002894	MAX network transcriptional repressor	Mnt	0.071	0.444	Bipolar
ENSRNOG00000002895	N-acetylglucosamine-1-phosphodiester alpha-N-acetylglucosaminidase	NAGPA	0.136	0.479	Microglia
ENSRNOG00000002896			0.721	1.62e-06
ENSRNOG00000002898	NME/NM23 family member 7	NME7	-0.615	1.77e-06
ENSRNOG00000002899	A-kinase anchoring protein 10	AKAP10	-0.567	2.81e-08
ENSRNOG00000002903	sperm antigen with calponin homology and coiled-coil domains 1	SPECC1	1.12	4.49e-26	Microglia
ENSRNOG00000002904	arrestin 3	ARR3	-0.352	0.187	Cones
ENSRNOG00000002905	coiled-coil domain containing 103	CCDC103	-1.186	0.0637
ENSRNOG00000002907	pleckstrin homology domain containing A6	Plekha6	-0.033	0.685
ENSRNOG00000002908	solute carrier family 35 member A4	SLC35A4	0.019	0.87	Muller
ENSRNOG00000002912	poly(A)-specific ribonuclease	PARN	-0.362	0.0057	Muller
ENSRNOG00000002914	tRNA methyltransferase 1	TRMT1	-0.105	0.395
ENSRNOG00000002915	tripartite motif-containing 11	Trim11	-0.275	0.00912
ENSRNOG00000002916	carbonic anhydrase 4	CA4	0.607	0.603
ENSRNOG00000002918	family with sequence similarity 187, member A	Fam187a	3.39	0.0196
ENSRNOG00000002919	glial fibrillary acidic protein	GFAP	4.145	4.67e-52	Muller
ENSRNOG00000002922	adenosine A2b receptor	ADORA2B	1.196	1.23e-06	Muller
ENSRNOG00000002925			-0.359	0.631
ENSRNOG00000002926	UDP-N-acetylglucosamine pyrophosphorylase 1	UAP1	-0.231	0.139
ENSRNOG00000002928	guanylate kinase 1	GUK1	-1.079	1.44e-43	Rods
ENSRNOG00000002930	periplakin	PPL	0.177	0.9
ENSRNOG00000002932	WD repeat domain 19	WDR19	-0.806	3.09e-19	Muller
ENSRNOG00000002934	ATPase Na+/K+ transporting subunit beta 1	ATP1B1	0.287	2.78e-06
ENSRNOG00000002935	ankyrin repeat domain 40	ANKRD40	0.022	0.814	RGCs
ENSRNOG00000002940	ankyrin repeat domain 17	ANKRD17	-0.399	2.45e-11
ENSRNOG00000002941	U2AF homology motif kinase 1	UHMK1	-0.234	0.0137
ENSRNOG00000002943	mitochondrial ribosomal protein L55	MRPL55	0.084	0.574
ENSRNOG00000002944	chromosome 1 open reading frame 35	C1orf35	-0.095	0.493
ENSRNOG00000002946			2.179	0.000542
ENSRNOG00000002947	dermatopontin	Dpt	-0.287	0.831
ENSRNOG00000002948	ATP binding cassette subfamily C member 3	ABCC3	-0.319	0.0267
ENSRNOG00000002949	phosphatidylglycerophosphate synthase 1	PGS1	0.124	0.246
ENSRNOG00000002950	LYL1 basic helix-loop-helix family member	LYL1	0.625	0.277	Microglia
ENSRNOG00000002953			-0.214	0.2
ENSRNOG00000002956	stromal interaction molecule 2	STIM2	-0.091	0.445	Bipolar
ENSRNOG00000002959	shroom family member 4	SHROOM4	0.025	0.927	Vascular
ENSRNOG00000002960	norrin cystine knot growth factor NDP	Ndp	0.883	0.019	Muller
ENSRNOG00000002963	complement C1q like 1	C1QL1	0.598	1.84e-06	Horizontal
ENSRNOG00000002968	TNF superfamily member 4	TNFSF4	2.681	0.0246
ENSRNOG00000002969	inositol-trisphosphate 3-kinase B	ITPKB	1.093	2.34e-11	Vascular
ENSRNOG00000002970	zinc finger SWIM-type containing 7	ZSWIM7	0.394	0.272
ENSRNOG00000002972	spermatogenesis associated 46	SPATA46	-0.596	0.193
ENSRNOG00000002975	cysteine rich protein 2	CRIP2	-0.938	0.267	Vascular
ENSRNOG00000002976	cilia and flagella associated protein 91	CFAP91	0.192	0.712
ENSRNOG00000002977	tetratricopeptide repeat domain 19	TTC19	-0.508	2.59e-05
ENSRNOG00000002978	Fas ligand	FASLG	0.184	0.783
ENSRNOG00000002979	T-box transcription factor 19	Tbx19	0.364	0.509	Microglia
ENSRNOG00000002980	TSR1 ribosome maturation factor	TSR1	-0.006	0.961
ENSRNOG00000002983	nuclear factor I X	NFIX	1.046	1.89e-17	Muller
ENSRNOG00000002984	bone morphogenetic protein 15	BMP15	-1.241	8.34e-13
ENSRNOG00000002986	EF-hand domain containing 2	EFHC2	0.22	0.562	Muller
ENSRNOG00000002989	N-myristoyltransferase 1	NMT1	-0.191	0.00581
ENSRNOG00000002991	serine racemase	SRR	-0.11	0.38
ENSRNOG00000002997	NHERF family PDZ scaffold protein 2	NHERF2	0.224	0.0948
ENSRNOG00000002999	translocase of inner mitochondrial membrane domain containing 1	TIMMDC1	-0.044	0.775	Muller
ENSRNOG00000003003	TBC1 domain family member 19	TBC1D19	-0.03	0.823
ENSRNOG00000003005	RasGEF domain family member 1C	RASGEF1C	0.461	0.404	Amacrine
ENSRNOG00000003011	GADD45G interacting protein 1	GADD45GIP1	0.028	0.869
ENSRNOG00000003013			-0.819	2.61e-11
ENSRNOG00000003014	protein O-glucosyltransferase 1	POGLUT1	0.073	0.521
ENSRNOG00000003018	olfactomedin like 2B	OLFML2B	0.126	0.671	Microglia
ENSRNOG00000003019	ubinuclein 1	UBN1	-0.472	4.62e-11
ENSRNOG00000003025	nucleosome assembly protein 1 like 2	NAP1L2	0.514	1.74e-08	RGCs
ENSRNOG00000003026	RAD23 homolog A, nucleotide excision repair protein	RAD23A	0.211	0.00596	Bipolar
ENSRNOG00000003028	dynein axonemal heavy chain 17	DNAH17	-0.591	0.336	Bipolar
ENSRNOG00000003029	calreticulin	CALR	-0.466	1.1e-08
ENSRNOG00000003031	ATPase plasma membrane Ca2+ transporting 4	ATP2B4	0.866	4.75e-15
ENSRNOG00000003033	phospholipase C delta 3	PLCD3	-1.397	8.3e-61	Bipolar
ENSRNOG00000003038	SFT2 domain containing 2	SFT2D2	0.008	0.986
ENSRNOG00000003041	SMG6 nonsense mediated mRNA decay factor	SMG6	0.242	0.0234	Bipolar
ENSRNOG00000003042	methyltransferase 13, eEF1A N-terminus and K55	METTL13	0.112	0.325	Microglia
ENSRNOG00000003048	TOR signaling pathway regulator	TIPRL	0.002	0.986	Muller
ENSRNOG00000003049	hydroxysteroid 17-beta dehydrogenase 10	HSD17B10	0.691	0.000277	RGCs
ENSRNOG00000003050	TBC1 domain family member 9B	TBC1D9B	0.345	1.59e-05
ENSRNOG00000003052	cytochrome c oxidase assembly factor COX18	COX18	-0.443	0.00378
ENSRNOG00000003059	opticin	OPTC	1.104
ENSRNOG00000003062	similar to kelch domain containing 2	LOC679960	0.364	0.553
ENSRNOG00000003063	phosphorylase kinase regulatory subunit alpha 1	PHKA1	-0.061	0.628	Vascular
ENSRNOG00000003064	bone marrow stromal cell antigen 1	BST1	-0.259	0.843
ENSRNOG00000003065	glyoxylate reductase 1 homolog	GLYR1	0.368	6.51e-09
ENSRNOG00000003068	MRN complex interacting protein	MRNIP	0.707	0.00128
ENSRNOG00000003069	CD38 molecule	CD38	0.175	0.802	Microglia
ENSRNOG00000003070	phosphatidylinositol glycan anchor biosynthesis class L	PIGL	-0.614	8.1e-06	Amacrine
ENSRNOG00000003071	vesicle associated membrane protein 4	VAMP4	0.006	0.956
ENSRNOG00000003073	G protein-coupled receptor 161	GPR161	1.364	2.41e-11
ENSRNOG00000003075	transmembrane protein 39A	TMEM39A	-0.118	0.488
ENSRNOG00000003076	RNA binding motif single stranded interacting protein 2	RBMS2	-0.057	0.642
ENSRNOG00000003078	DDB1 and CUL4 associated factor 6	DCAF6	-0.257	0.00153
ENSRNOG00000003081	RIB43A domain with coiled-coils 1	RIBC1	0.137	0.546	Rods
ENSRNOG00000003084	poly(ADP-ribose) polymerase 1	PARP1	-0.473	5.73e-13	Bipolar
ENSRNOG00000003086	centromere protein V	CENPV	0.818	1.4e-07
ENSRNOG00000003088	Rho GTPase activating protein 31	ARHGAP31	0.805	3.23e-07
ENSRNOG00000003095	fibroblast growth factor binding protein 1	FGFBP1	-0.536	0.554
ENSRNOG00000003098	prominin 1	PROM1	-1.83	4.81e-107	Rods
ENSRNOG00000003099	ubiquilin 2	UBQLN2	0.298	0.00257
ENSRNOG00000003100	dual specificity phosphatase 12	DUSP12	-0.179	0.285	Bipolar
ENSRNOG00000003104	transient receptor potential cation channel subfamily V member 2	TRPV2	0.557	0.00542	Microglia
ENSRNOG00000003105	kinesin family member 19	KIF19	-1.474	1.57e-54
ENSRNOG00000003108	acyl-CoA binding domain containing 4	ACBD4	0.064	0.537	Bipolar
ENSRNOG00000003109	BTB domain containing 17	BTBD17	-0.79	1.84e-05	Bipolar
ENSRNOG00000003114	beta-1,4-galactosyltransferase 4	B4GALT4	0.5	0.0044	Muller
ENSRNOG00000003116			0.318	0.0113
ENSRNOG00000003117	proteasome 26S subunit, non-ATPase 12	PSMD12	0	0.996	RGCs
ENSRNOG00000003120	proline and arginine rich end leucine rich repeat protein	PRELP	1.302	2.73e-13	Muller
ENSRNOG00000003121	reticulon 4 receptor like 1	RTN4RL1	0.549	1.6e-13
ENSRNOG00000003122	histone deacetylase 8	HDAC8	-0.114	0.622
ENSRNOG00000003123	replication protein A1	RPA1	-0.025	0.734
ENSRNOG00000003125	rogdi atypical leucine zipper	ROGDI	0.086	0.375	Bipolar
ENSRNOG00000003127	SPRY domain containing 4	SPRYD4	0.273	0.2	Bipolar
ENSRNOG00000003129	zinc finger protein 496	ZNF496	-0.438	0.000698	Microglia
ENSRNOG00000003131	TNF receptor associated factor 7	TRAF7	0.203	0.0282
ENSRNOG00000003132	major intrinsic protein of lens fiber	MIP	2.668
ENSRNOG00000003134	solute carrier family 4 member 4	SLC4A4	0.85	0.233
ENSRNOG00000003136	Fc receptor like A	FCRLA	3.595	4.12e-05
ENSRNOG00000003139	structural maintenance of chromosomes 1A	SMC1A	-0.188	0.00259
ENSRNOG00000003144	G protein-coupled receptor class C group 5 member C	GPRC5C	1.305	0.273
ENSRNOG00000003147	sequestosome 1	SQSTM1	0.584	2e-23	Muller
ENSRNOG00000003148			1.112	9.09e-07
ENSRNOG00000003149			-0.547	2.4e-08
ENSRNOG00000003150	mitochondrial pyruvate carrier 2	MPC2	-0.088	0.449
ENSRNOG00000003151	bifunctional apoptosis regulator	BFAR	-0.211	0.0447
ENSRNOG00000003160			1.86	0.0405
ENSRNOG00000003163	succinate dehydrogenase complex subunit C	SDHC	-0.065	0.508
ENSRNOG00000003170	NLR family pyrin domain containing 3	NLRP3	1.096	0.0121	Microglia
ENSRNOG00000003172	serpin family F member 1	SERPINF1	0.437	0.636
ENSRNOG00000003174	transmembrane anterior posterior transformation 1	TAPT1	-1.012	4.04e-35
ENSRNOG00000003177	methionine adenosyltransferase 2 non-catalytic beta subunit	MAT2B	-0.142	0.0715
ENSRNOG00000003178	MAGE family member H1	MAGEH1	0.056	0.693	Muller
ENSRNOG00000003183	fibromodulin	FMOD	2.084	0.0167	Muller
ENSRNOG00000003185	acyl-CoA binding domain containing 3	ACBD3	-0.166	0.0233
ENSRNOG00000003186	ankyrin repeat and sterile alpha motif domain containing 3	ANKS3	-0.14	0.112
ENSRNOG00000003187	armadillo repeat containing X-linked 5	ARMCX5	0.167	0.465	Bipolar
ENSRNOG00000003189	Cbp/p300 interacting transactivator with Glu/Asp rich carboxy-terminal domain 1	CITED1	-0.224	0.36
ENSRNOG00000003191	G protein-coupled receptor associated sorting protein family member 3	GPRASP3	-0.302	0.00219	Muller
ENSRNOG00000003195	CASK interacting protein 1	CASKIN1	0.538	7.49e-13	RGCs
ENSRNOG00000003198	bMERB domain containing 1	BMERB1	0.442	5.76e-07
ENSRNOG00000003201	ribosomal protein S4 Y-linked 1	RPS4Y1	-0.197	0.0272	Rods
ENSRNOG00000003203	HEXIM P-TEFb complex subunit 1	HEXIM1	0.374	1.4e-05	Vascular
ENSRNOG00000003205	LIM domain binding 2	LDB2	0.095	0.408
ENSRNOG00000003206	actin related protein 3	ACTR3	-0.177	0.00223	Microglia
ENSRNOG00000003207	formin-like 1	Fmnl1	0.1	0.535
ENSRNOG00000003208	ERCC excision repair 6 like, spindle assembly checkpoint helicase	ERCC6L	-0.006	0.992
ENSRNOG00000003209	Purkinje cell protein 4-like 1	Pcp4l1	0.464	0.000837	Bipolar
ENSRNOG00000003211	signal recognition particle 9	SRP9	0	0.998	Muller
ENSRNOG00000003213	helicase with zinc finger	HELZ	-0.401	1.73e-05
ENSRNOG00000003214			0.869	0.000122
ENSRNOG00000003215	zinc finger protein 287	ZNF287	-0.447	0.00122
ENSRNOG00000003217	galectin 3 binding protein	LGALS3BP	1.856	0.00012	Muller
ENSRNOG00000003218	zinc finger protein 286A	ZNF286A	-0.003	0.99	Vascular
ENSRNOG00000003219			0.331	0.196
ENSRNOG00000003220	H3.3 histone A	H3-3A/H3-3B	-0.57	2.16e-08
ENSRNOG00000003221	myocilin	MYOC	0.034	0.966
ENSRNOG00000003223	delta 4-desaturase, sphingolipid 1	DEGS1	0.428	0.000412
ENSRNOG00000003224	nudix hydrolase 16 like 1	NUDT16L1	0.071	0.666	Muller
ENSRNOG00000003226	myosin phosphatase Rho interacting protein	MPRIP	0.056	0.549
ENSRNOG00000003228	MID1 interacting protein 1	MID1IP1	0.522	1.17e-05
ENSRNOG00000003229	tetraspanin 7	TSPAN7	0.008	0.916
ENSRNOG00000003232	NHERF family PDZ scaffold protein 1	NHERF1	0.434	7.32e-05	Muller
ENSRNOG00000003233	serpin family F member 2	SERPINF2	0.673	0.132
ENSRNOG00000003234	mahogunin ring finger 1	MGRN1	0.377	7.47e-06	Amacrine
ENSRNOG00000003235	alpha-1,3-mannosyl-glycoprotein 4-beta-N-acetylglucosaminyltransferase B	MGAT4B	0.425	0.00609	Horizontal
ENSRNOG00000003237	tumor protein p53 binding protein 2	TP53BP2	-0.094	0.449	Rods
ENSRNOG00000003239	calcium activated nucleotidase 1	CANT1	0.009	0.946
ENSRNOG00000003241	gamma-aminobutyric acid type A receptor subunit gamma2	GABRG2	0.409	3.36e-09
ENSRNOG00000003242	GULP PTB domain containing engulfment adaptor 1	GULP1	-0.744	1.17e-07	Muller
ENSRNOG00000003243	WD repeat domain 81	WDR81	0.154	0.115	Microglia
ENSRNOG00000003244	leukotriene C4 synthase	LTC4S	0.092	0.892	Microglia
ENSRNOG00000003247	SDE2 telomere maintenance homolog	SDE2	-0.424	8.26e-07
ENSRNOG00000003248	myelin protein zero like 1	MPZL1	0.713	4.4e-09
ENSRNOG00000003251	beta-1,3-galactosyltransferase 2	B3GALT2	0.227	0.011	Bipolar
ENSRNOG00000003253	quinoid dihydropteridine reductase	QDPR	0.255	0.0221	Muller
ENSRNOG00000003254	interleukin 23 subunit alpha	IL23A	0.563	0.157	Vascular
ENSRNOG00000003256	cyclin G1	CCNG1	-0.404	3.6e-09
ENSRNOG00000003258	cell division cycle 73	CDC73	-0.692	8.29e-12	Bipolar
ENSRNOG00000003259	C1q and TNF related 1	C1QTNF1	0.31	0.422	Vascular
ENSRNOG00000003260	nuclear receptor subfamily 1 group I member 3	NR1I3	-0.277	0.0942	Microglia
ENSRNOG00000003261	ubiquitin specific peptidase 9 X-linked	USP9X	-0.24	0.000398	Bipolar
ENSRNOG00000003262	calcium voltage-gated channel auxiliary subunit gamma 4	CACNG4	0.647	6.09e-08	Muller
ENSRNOG00000003264	N-acetyltransferase 9 (putative)	NAT9	-0.145	0.335	Bipolar
ENSRNOG00000003266	EF-hand calcium binding domain 15	Efcab15	1.087	0.0119
ENSRNOG00000003267	pyrroline-5-carboxylate reductase 2	PYCR2	-0.225	0.048	Muller
ENSRNOG00000003268	mastermind like transcriptional coactivator 1	MAML1	-0.428	0.00144
ENSRNOG00000003269	ATPase H+ transporting V0 subunit e1	ATP6V0E1	0.502	0.0024
ENSRNOG00000003273	spermatogenesis associated 20	SPATA20	1.504	3.44e-11	RGCs
ENSRNOG00000003276	myosin ID	MYO1D	0.451	0.063	Vascular
ENSRNOG00000003278	mitogen-activated protein kinase kinase kinase 14	MAP3K14	0.537	0.000907	Microglia
ENSRNOG00000003279			0.049	0.851
ENSRNOG00000003280	glutamate ionotropic receptor NMDA type subunit 2C	GRIN2C	0.145	0.27
ENSRNOG00000003281	minichromosome maintenance 9 homologous recombination repair factor	MCM9	-0.721	1.09e-11	Bipolar
ENSRNOG00000003283	RCSD domain containing 1	RCSD1	0.317	0.454
ENSRNOG00000003284	epsin 3	EPN3	0.392	0.0824
ENSRNOG00000003285	MPV17 mitochondrial inner membrane protein like	MPV17L	-0.009	0.981
ENSRNOG00000003287			0.397	0.564
ENSRNOG00000003288	calcium voltage-gated channel auxiliary subunit gamma 5	CACNG5	0.252	0.0868
ENSRNOG00000003289	leucine aminopeptidase 3	LAP3	0.614	3.19e-08	Microglia
ENSRNOG00000003291	cellular repressor of E1A stimulated genes 1	CREG1	0.142	0.37	Microglia
ENSRNOG00000003296	deoxycytidine kinase	DCK	0.48	0.00725	Microglia
ENSRNOG00000003300	BTG anti-proliferation factor 2	BTG2	-0.75	5.08e-18
ENSRNOG00000003302	folliculin	FLCN	-0.175	0.0439	Muller
ENSRNOG00000003304	chondroadherin	CHAD	0.552	0.242
ENSRNOG00000003307	glutaryl-CoA dehydrogenase	GCDH	-0.353	4.43e-05
ENSRNOG00000003310	transmembrane protein 63A	TMEM63A	1.129	0.00157	Microglia
ENSRNOG00000003313	glycine receptor alpha 2	GLRA2	0.233	0.119	Amacrine
ENSRNOG00000003326	RRN3 homolog, RNA polymerase I transcription factor	RRN3	-0.349	0.00077
ENSRNOG00000003328	cell death inducing p53 target 1	CDIP1	0.203	0.0353
ENSRNOG00000003329	protein phosphatase, Mg2+/Mn2+ dependent 1D	PPM1D	-0.573	1.82e-09	Bipolar
ENSRNOG00000003330	acyl-CoA synthetase family member 2	ACSF2	0.907	3.09e-14
ENSRNOG00000003332	5',3'-nucleotidase, mitochondrial	NT5M	-0.551	5.72e-06	RGCs
ENSRNOG00000003334	kelch like family member 21	KLHL21	0.687	0.000307	Muller
ENSRNOG00000003336	myosin binding protein H	MYBPH	0.752	9.57e-12
ENSRNOG00000003338	peripheral myelin protein 22	PMP22	0.938	0.00349	Muller
ENSRNOG00000003343	calnexin	CANX	0.048	0.552
ENSRNOG00000003346	FA complementation group B	FANCB	-0.253	0.338
ENSRNOG00000003348	ras related dexamethasone induced 1	RASD1	-0.029	0.922	Muller
ENSRNOG00000003349	collagen type XXIII alpha 1 chain	COL23A1	0.307	0.00477	Muller
ENSRNOG00000003350	motile sperm domain containing 2	MOSPD2	0.065	0.699
ENSRNOG00000003354	poly(A) binding protein cytoplasmic 5	PABPC5	0.978	0.166	Bipolar
ENSRNOG00000003357	collagen type III alpha 1 chain	COL3A1	-1.731	0.00498	Vascular
ENSRNOG00000003359	O-linked N-acetylglucosamine (GlcNAc) transferase	OGT	-0.499	7.21e-07
ENSRNOG00000003365	cell adhesion molecule 3	CADM3	0.731	7.38e-23
ENSRNOG00000003367	transmembrane protein 220	TMEM220	0.43	0.548	Muller
ENSRNOG00000003374	coiled-coil domain containing 85A	CCDC85A	0.445	0.0275
ENSRNOG00000003384	heparan sulfate-glucosamine 3-sulfotransferase 3B1	HS3ST3B1	-2.348	2.19e-55	Photoreceptors
ENSRNOG00000003385	glutaredoxin 2	GLRX2	0.212	0.0872
ENSRNOG00000003386	RNA binding protein, fox-1 homolog (C. elegans) 3	Rbfox3	0.653	1e-05	RGCs
ENSRNOG00000003388	centromere protein F	CENPF	-0.149	0.761	Bipolar
ENSRNOG00000003392	G-rich RNA sequence binding factor 1	GRSF1	-0.172	0.01
ENSRNOG00000003395			-1.258	4.22e-05
ENSRNOG00000003397	ADP-ribose/CDP-alcohol diphosphatase, manganese dependent	ADPRM	-0.154	0.354	Rods
ENSRNOG00000003398	translocase of outer mitochondrial membrane 40 like	TOMM40L	-0.145	0.265
ENSRNOG00000003399	heterogeneous nuclear ribonucleoprotein H1	Hnrnph1	-0.201	0.0243	Bipolar
ENSRNOG00000003400	flavin containing dimethylaniline monoxygenase 4	FMO4	0.56	0.347
ENSRNOG00000003402	syntaxin 6	STX6	0.04	0.679	Amacrine
ENSRNOG00000003403	solute carrier family 35 member F5	SLC35F5	-0.444	1.52e-05	Muller
ENSRNOG00000003407	protein tyrosine phosphatase, non-receptor type 14	Ptpn14	-1.539	1.02e-14	Vascular
ENSRNOG00000003424	elaC ribonuclease Z 2	ELAC2	-0.334	0.00211	RGCs
ENSRNOG00000003428	RUN and FYVE domain containing 3	RUFY3	-0.09	0.167	Bipolar
ENSRNOG00000003430	coagulation factor IX	F9	2.141	0.0196
ENSRNOG00000003434	Ro60, Y RNA binding protein	RO60	-1.352	2.97e-25
ENSRNOG00000003435	MCF.2 cell line derived transforming sequence	MCF2	-0.109	0.807	RGCs
ENSRNOG00000003439	interleukin 15	IL15	0.364	0.272
ENSRNOG00000003442	adenosine A1 receptor	ADORA1	0.776	3.91e-17	Muller
ENSRNOG00000003443	KLF transcription factor 1	KLF1	-0.52	0.2
ENSRNOG00000003453	LY6/PLAUR domain containing 1	LYPD1	0.842	4.32e-23
ENSRNOG00000003455	zinc finger protein 205	ZNF205	-0.08	0.553	Muller
ENSRNOG00000003457	BICD family like cargo adaptor 2	BICDL2	-0.052	0.9
ENSRNOG00000003461	zinc finger protein 330	ZNF330	-0.32	6.06e-05	Bipolar
ENSRNOG00000003463	sterol regulatory element binding transcription factor 1	SREBF1	0.755	5.95e-18	Muller
ENSRNOG00000003464	HID1 domain containing	HID1	0.615	2.01e-11	Bipolar
ENSRNOG00000003468	calpain 8	CAPN8	-0.872	0.374
ENSRNOG00000003469	microtubule associated serine/threonine kinase 1	MAST1	-0.407	1.87e-08
ENSRNOG00000003470	FUN14 domain containing 1	FUNDC1	0.37	0.000121	Muller
ENSRNOG00000003472	ATPase phospholipid transporting 11C	ATP11C	-0.446	7.62e-05
ENSRNOG00000003479	ring finger protein 150	RNF150	0.355	0.0013	Bipolar
ENSRNOG00000003480	absent in melanoma 2	AIM2	1.457	0.102
ENSRNOG00000003491	protein kinase C alpha	PRKCA	0.201	0.0154	Bipolar
ENSRNOG00000003494	protein tyrosine phosphatase, receptor type, f polypeptide (PTPRF), interacting protein (liprin), alpha 4	Ppfia4	0.569	6.16e-07	Amacrine
ENSRNOG00000003495	pre-mRNA processing factor 8	PRPF8	0.031	0.682	Bipolar
ENSRNOG00000003496	TBC1 domain family member 9	TBC1D9	-0.342	7.24e-06
ENSRNOG00000003497	THO complex subunit 6	THOC6	0.304	0.114	Muller
ENSRNOG00000003504	thrombospondin type 1 domain containing 8	Thsd8	0.044	0.762
ENSRNOG00000003506	golgi SNAP receptor complex member 2	GOSR2	0.057	0.603
ENSRNOG00000003508	endoplasmic reticulum-golgi intermediate compartment 1	ERGIC1	0.487	0.000352
ENSRNOG00000003510	flavin containing dimethylaniline monoxygenase 2	FMO2	-1.646	0.0466	Vascular
ENSRNOG00000003512	gamma-aminobutyric acid type A receptor subunit alpha1	GABRA1	0.871	6.84e-19	Bipolar
ENSRNOG00000003515	epoxide hydrolase 1	EPHX1	1.151	5.15e-05
ENSRNOG00000003517	T-box transcription factor 2	Tbx2	0.651	5.55e-10
ENSRNOG00000003518	olfactory receptor family 6 subfamily K member 6	OR6K6	-0.529	0.445
ENSRNOG00000003520	peroxiredoxin 2	PRDX2	0.065	0.392	RGCs
ENSRNOG00000003522	major histocompatibility complex, class I-related	MR1	1.467	0.00144	Microglia
ENSRNOG00000003524	leucine rich repeat containing 59	LRRC59	-0.164	0.108
ENSRNOG00000003526	synaptotagmin like 4	SYTL4	0.111	0.892
ENSRNOG00000003533	chloride voltage-gated channel 4	CLCN4	-0.475	2.46e-16
ENSRNOG00000003536	RUN and FYVE domain containing 1	RUFY1	0.075	0.406
ENSRNOG00000003537	spectrin alpha, erythrocytic 1	SPTA1	1.386
ENSRNOG00000003538	ADAM metallopeptidase with thrombospondin type 1 motif 4	ADAMTS4	1.775	2.5e-17	Vascular
ENSRNOG00000003541	protein geranylgeranyltransferase type I subunit beta	PGGT1B	-0.695	7.83e-11	Rods
ENSRNOG00000003542	host cell factor C1 regulator 1	HCFC1R1	0.099	0.451	RGCs
ENSRNOG00000003543	G protein-coupled receptor 143	GPR143	0.661	0.321
ENSRNOG00000003544	T-box transcription factor 4	TBX4	-1.766	0.0617
ENSRNOG00000003545	ubiquitin C-terminal hydrolase L5	UCHL5	-0.764	7.13e-12	Amacrine
ENSRNOG00000003546	TNF receptor superfamily member 12A	TNFRSF12A	1.494	2.33e-11	Muller
ENSRNOG00000003549	canopy FGF signaling regulator 2	CNPY2	-0.146	0.201	Muller
ENSRNOG00000003550	acyl-CoA binding domain containing 6	ACBD6	0.452	1.68e-06
ENSRNOG00000003551	beta-1,4-galactosyltransferase 3	B4GALT3	-0.075	0.535
ENSRNOG00000003553	EGF containing fibulin extracellular matrix protein 1	EFEMP1	0.913	0.0232	Muller
ENSRNOG00000003554	phosphatidylinositol glycan anchor biosynthesis class A	PIGA	-0.624	8.35e-05
ENSRNOG00000003559	coiled-coil domain containing 112	CCDC112	-0.275	0.03
ENSRNOG00000003562	sushi domain containing 4	SUSD4	0.413	9.97e-06
ENSRNOG00000003563	bleomycin hydrolase	BLMH	-0.378	3.24e-07
ENSRNOG00000003567	protoporphyrinogen oxidase	PPOX	-0.269	0.0369	Bipolar
ENSRNOG00000003576	integrator complex subunit 2	INTS2	-0.466	2.07e-05	Bipolar
ENSRNOG00000003578	fem-1 homolog C	FEM1C	-0.348	0.000298
ENSRNOG00000003581	POU class 2 homeobox 1	POU2F1	-0.73	2.89e-05	Amacrine
ENSRNOG00000003583	SET and MYND domain containing 2	SMYD2	0.749	3.28e-18	RGCs
ENSRNOG00000003585	synaptotagmin like 5	SYTL5	0.192	0.515
ENSRNOG00000003587	vascular endothelial growth factor D	VEGFD	-1.307	0.0274
ENSRNOG00000003590	target of myb1 like 2 membrane trafficking protein	TOM1L2	0.106	0.22
ENSRNOG00000003592	mediator complex subunit 28	MED28	-0.219	0.0953
ENSRNOG00000003594	transmembrane protein 183A	TMEM183A	-0.194	0.0227	Amacrine
ENSRNOG00000003595	LIM homeobox 4	LHX4	0.627	3.49e-08	Bipolar
ENSRNOG00000003596	integrin subunit beta 1 binding protein 2	ITGB1BP2	-1.143	0.000483
ENSRNOG00000003597	tubulin alpha 4a	TUBA4A	-0.002	0.989	RGCs
ENSRNOG00000003599	UTP3 small subunit processome component	UTP3	-0.776	2.68e-16	Rods
ENSRNOG00000003600	polyribonucleotide nucleotidyltransferase 1	PNPT1	-0.253	0.0275
ENSRNOG00000003603	Rho GTPase activating protein 44	ARHGAP44	0.416	5.91e-09
ENSRNOG00000003606	similar to microsomal glutathione S-transferase 3	RGD1561381	-0.077	0.923
ENSRNOG00000003611	dynein light chain Tctex-type 3	DYNLT3	0	0.999	RGCs
ENSRNOG00000003613	midline 1	MID1	0.546	6.62e-06
ENSRNOG00000003614	alpha-1,6-mannosylglycoprotein 6-beta-N-acetylglucosaminyltransferase	MGAT5	0.838	4.49e-09
ENSRNOG00000003616	gremlin 2, DAN family BMP antagonist	GREM2	0.774	4.18e-09	Bipolar
ENSRNOG00000003622	cytochrome b-245 beta chain	CYBB	-0.39	0.719	Microglia
ENSRNOG00000003625	UBX domain protein 4	UBXN4	0.019	0.796	Rods
ENSRNOG00000003626	ATP synthase peripheral stalk subunit d	ATP5PD	-0.341	3.35e-06
ENSRNOG00000003629	nuclear VCP like	NVL	-0.494	5.42e-06	Bipolar
ENSRNOG00000003633	recoverin	RCVRN	-2.553	1.02e-157	Rods
ENSRNOG00000003634	zinc finger protein 354A	ZNF354A	-0.649	0.000228	Microglia
ENSRNOG00000003635	dispatched RND transporter family member 1	DISP1	-0.252	0.00896	Microglia
ENSRNOG00000003643	TGF-beta activated kinase 1 (MAP3K7) binding protein 3	TAB3	-0.712	0.000336	Vascular
ENSRNOG00000003648			0.985	0.325
ENSRNOG00000003649	quiescin sulfhydryl oxidase 1	QSOX1	1.407	5.27e-54
ENSRNOG00000003650	5', 3'-nucleotidase, cytosolic	NT5C	-0.08	0.84
ENSRNOG00000003653	fumarate hydratase	FH	-0.07	0.523
ENSRNOG00000003654	claudin 6	CLDN6	3.046	1.32e-47
ENSRNOG00000003657	protein kinase, membrane associated tyrosine/threonine 1	PKMYT1	-0.621	0.121	Rods
ENSRNOG00000003661			0.04	0.746
ENSRNOG00000003666	joining chain of multimeric IgA and IgM	Jchain	0.625	0.357
ENSRNOG00000003669	myocardin	MYOCD	0.458	0.215	Vascular
ENSRNOG00000003670			-0.099	0.259
ENSRNOG00000003673	nucleoporin 85	NUP85	-0.468	3.33e-06	Bipolar
ENSRNOG00000003674	pirin	PIR	1.562	3.01e-28	Muller
ENSRNOG00000003675			0.288	0.119
ENSRNOG00000003679	mediator complex subunit 13	MED13	-0.572	5.67e-16
ENSRNOG00000003680	gamma-aminobutyric acid type A receptor subunit beta2	GABRB2	0.134	0.36
ENSRNOG00000003682	hook microtubule tethering protein 2	HOOK2	0.032	0.839	Bipolar
ENSRNOG00000003683	glucagon like peptide 2 receptor	GLP2R	-1.133	3.06e-15
ENSRNOG00000003686	transducin beta like 1 X-linked	TBL1X	-0.209	0.00351	Muller
ENSRNOG00000003687	regulator of G protein signaling 2	RGS2	0.408	0.00077	Microglia
ENSRNOG00000003689	non-POU domain containing octamer binding	NONO	-0.471	3.2e-11
ENSRNOG00000003691	transmembrane p24 trafficking protein 7	TMED7	0.027	0.819	Muller
ENSRNOG00000003694	prospero homeobox 1	PROX1	0.673	4.34e-13
ENSRNOG00000003695	MGAT4 family member D	MGAT4D	-3.027	3.31e-25
ENSRNOG00000003699	endonuclease V	Endov	-0.044	0.816
ENSRNOG00000003703	minichromosome maintenance complex component 6	MCM6	0.233	0.252
ENSRNOG00000003704	family with sequence similarity 184, member B	Fam184b	-0.534	8.33e-06
ENSRNOG00000003705	BMX non-receptor tyrosine kinase	BMX	1.983	1.61e-05	Vascular
ENSRNOG00000003706	ubiquitin-fold modifier conjugating enzyme 1	UFC1	-0.175	0.0912
ENSRNOG00000003707	zinc finger MYM-type containing 3	ZMYM3	0.399	3.46e-05
ENSRNOG00000003712	protein phosphatase 4 regulatory subunit 3B	PPP4R3B	-0.279	1.31e-05
ENSRNOG00000003714	CDC-like kinase 4	Clk4	-0.298	0.00156	Bipolar
ENSRNOG00000003717	cornichon family AMPA receptor auxiliary protein 4	CNIH4	-0.125	0.273
ENSRNOG00000003719	ATP synthase mitochondrial F1 complex assembly factor 2	ATPAF2	0.078	0.491	Cones
ENSRNOG00000003720	paired related homeobox 1	PRRX1	0.844	0.205	Vascular
ENSRNOG00000003721			-1.128	1.97e-21
ENSRNOG00000003723	WD repeat domain 26	WDR26	-0.223	0.0107
ENSRNOG00000003724	mitochondrial ribosomal protein L27	MRPL27	0.081	0.692
ENSRNOG00000003726	Scm polycomb group protein like 2	SCML2	0.295	0.364	Bipolar
ENSRNOG00000003728	xylosyltransferase 2	XYLT2	0.45	3.12e-06
ENSRNOG00000003732	fibronectin leucine rich transmembrane protein 2	FLRT2	0.643	2.66e-06
ENSRNOG00000003734	similar to CXXC finger 5	LOC681300	0.159	0.849
ENSRNOG00000003736	collagen type V alpha 2 chain	COL5A2	0.019	0.95	Vascular
ENSRNOG00000003737	bestrophin 2	BEST2	2.125
ENSRNOG00000003738	usherin	USH2A	-2.817	3.16e-279	Rods
ENSRNOG00000003741	neuronal pentraxin 1	NPTX1	0.898	6.58e-22
ENSRNOG00000003742	cyclin dependent kinase like 5	CDKL5	-0.558	0.00102	Horizontal
ENSRNOG00000003743	aspartyl-tRNA synthetase 1	DARS1	0.007	0.934
ENSRNOG00000003745	activating transcription factor 3	ATF3	0.17	0.537	Microglia
ENSRNOG00000003747	guided entry of tail-anchored proteins factor 3, ATPase	GET3	-0.042	0.726
ENSRNOG00000003749	X-linked Kx blood group antigen, Kell and VPS13A binding protein	XK	-0.024	0.93	RGCs
ENSRNOG00000003755	calmegin	CLGN	-1.428	3.33e-25	Muller
ENSRNOG00000003756	LanC like family member 3	LANCL3	0.74	0.00652	RGCs
ENSRNOG00000003759	galactosylceramidase	GALC	0.047	0.826
ENSRNOG00000003762	SWI/SNF related, matrix associated, actin dependent regulator of chromatin, subfamily a, member 1	SMARCA1	0.057	0.689
ENSRNOG00000003763	peroxiredoxin 4	PRDX4	0.3	0.111
ENSRNOG00000003767	ribosomal protein S6 kinase C1	RPS6KC1	-0.066	0.564	Bipolar
ENSRNOG00000003769	transmembrane protein 163	TMEM163	0.318	0.0441
ENSRNOG00000003772	cysteine and glycine rich protein 2	CSRP2	-0.039	0.792
ENSRNOG00000003773	heme oxygenase 2	HMOX2	0.06	0.463	RGCs
ENSRNOG00000003777	cholinergic receptor nicotinic epsilon subunit	CHRNE	-1.434	1.84e-07
ENSRNOG00000003778	opsin 3	OPN3	-0.276	0.454
ENSRNOG00000003779	death effector domain containing	DEDD	0.015	0.919	Vascular
ENSRNOG00000003782	acyl-CoA thioesterase 9	ACOT9	0.481	0.000221
ENSRNOG00000003784	Rab interacting lysosomal protein	RILP	0.23	0.681	Amacrine
ENSRNOG00000003785	ubiquitin specific peptidase 43	USP43	-0.38	0.65	Muller
ENSRNOG00000003786	tetraspanin 6	TSPAN6	0.274	0.125
ENSRNOG00000003787	ligand dependent nuclear receptor corepressor like	LCORL	-0.573	0.0335	Amacrine
ENSRNOG00000003792	mediator complex subunit 14	MED14	-0.36	4.65e-05	Microglia
ENSRNOG00000003794	NmrA like redox sensor 1	NMRAL1	-0.005	0.98
ENSRNOG00000003795	angel homolog 2	ANGEL2	-0.249	0.00121
ENSRNOG00000003797	mitochondrial ribosomal protein S7	MRPS7	0.083	0.592
ENSRNOG00000003800	regulator of G protein signaling 9	RGS9	-1.8	1.08e-161	Rods
ENSRNOG00000003802	PTTG1 regulator of sister chromatid separation, securin	PTTG1	0.546	0.638
ENSRNOG00000003803	zinc finger DHHC-type palmitoyltransferase 17	ZDHHC17	-0.449	6.62e-08
ENSRNOG00000003805	ring finger protein, transmembrane 1	RNFT1	-0.051	0.789
ENSRNOG00000003807	Wnt family member 9B	WNT9B	0.696	0.00359
ENSRNOG00000003809	spermidine/spermine N1-acetyltransferase 1	SAT1	0.392	0.00731
ENSRNOG00000003812	neuroligin 3	NLGN3	0.596	1.42e-14
ENSRNOG00000003813	potassium two pore domain channel subfamily K member 10	KCNK10	0.557	0.215
ENSRNOG00000003815	solute carrier family 25 member 11	SLC25A11	-0.18	0.00768
ENSRNOG00000003816	transcriptional adaptor 1	TADA1	-0.218	0.0475	Muller
ENSRNOG00000003821	regulatory associated protein of MTOR complex 1	RPTOR	-0.213	0.0152
ENSRNOG00000003822	SLU7 homolog, splicing factor	SLU7	-0.121	0.12
ENSRNOG00000003825	WD repeat domain 75	WDR75	-0.31	0.00303	Microglia
ENSRNOG00000003827	WD repeat domain, phosphoinositide interacting 1	WIPI1	-0.863	8.38e-25
ENSRNOG00000003829	adaptor related protein complex 3 subunit sigma 1	AP3S1	-0.477	2.38e-05	Bipolar
ENSRNOG00000003831	tyrosyl-DNA phosphodiesterase 1	TDP1	0.54	0.00183
ENSRNOG00000003832	vasohibin 2	VASH2	0.514	0.0144	Amacrine
ENSRNOG00000003833	neudesin neurotrophic factor	NENF	0.208	0.363	Muller
ENSRNOG00000003834	mitogen-activated protein kinase kinase 4	MAP2K4	0.092	0.521
ENSRNOG00000003835	solute carrier family 43 member 2	SLC43A2	0.418	5.74e-07
ENSRNOG00000003837			-0.76	2.44e-13
ENSRNOG00000003840	slit guidance ligand 2	SLIT2	0.48	6.74e-05	Bipolar
ENSRNOG00000003841	potassium voltage-gated channel subfamily H member 1	KCNH1	1.02	7.7e-06
ENSRNOG00000003844	DEAH-box helicase 15	DHX15	-0.278	0.00223
ENSRNOG00000003845	Wnt family member 3	WNT3	0.673	0.242
ENSRNOG00000003846	phosphatidylinositol transfer protein alpha	PITPNA	0.182	0.00729
ENSRNOG00000003847			-0.48	1.1e-07
ENSRNOG00000003848	mediator complex subunit 12	MED12	-0.19	0.00467
ENSRNOG00000003849	syntaxin 8	STX8	-0.201	0.231	Muller
ENSRNOG00000003853	short coiled-coil protein	SCOC	0.182	0.0282
ENSRNOG00000003855	DnaJ heat shock protein family (Hsp40) member A3	DNAJA3	-0.243	0.00265
ENSRNOG00000003858	ATPase H+ transporting accessory protein 2	ATP6AP2	0.056	0.405	Amacrine
ENSRNOG00000003861	golgin, RAB6 interacting	GORAB	0.015	0.924
ENSRNOG00000003863	telomerase RNA component interacting RNase	TRIR	0.084	0.438
ENSRNOG00000003864	GIPC PDZ domain containing family member 1	GIPC1	-0.163	0.161	Vascular
ENSRNOG00000003866	C-X-C motif chemokine receptor 4	CXCR4	-1.783	0.000314	Microglia
ENSRNOG00000003869	superoxide dismutase 3	SOD3	1.822	0.232	Vascular
ENSRNOG00000003870	C1q and TNF related 2	C1QTNF2	-0.118	0.813
ENSRNOG00000003872	solute carrier family 40 member 1	SLC40A1	0.143	0.856	Rods
ENSRNOG00000003873	carboxypeptidase D	CPD	-0.399	0.00153
ENSRNOG00000003875	OCRL inositol polyphosphate-5-phosphatase	OCRL	-0.144	0.219
ENSRNOG00000003878	thrombospondin type 1 domain containing 7B	THSD7B	0.195	0.287	Horizontal
ENSRNOG00000003879	ring finger protein 167	RNF167	0.016	0.867	Bipolar
ENSRNOG00000003880	tryptophan hydroxylase 2	TPH2	0.779	0.0314
ENSRNOG00000003881	nitrilase 1	NIT1	-0.24	0.0148	Amacrine
ENSRNOG00000003882	centrosomal protein 350	CEP350	-0.879	2.47e-44
ENSRNOG00000003887			1.05	1.87e-17
ENSRNOG00000003888	regulator of G protein signaling 13	RGS13	-0.02	0.954	Amacrine
ENSRNOG00000003889	TBC1 domain family member 15	TBC1D15	-0.345	0.000415
ENSRNOG00000003890	nucleosome assembly protein 1 like 1	NAP1L1	-0.419	2.86e-11
ENSRNOG00000003891			2.526	8.75e-17
ENSRNOG00000003893	cyclin J-like	Ccnjl	0.435	0.0587
ENSRNOG00000003895	regulator of G protein signaling 1	RGS1	0.523	0.47	Microglia
ENSRNOG00000003897	collagen type I alpha 1 chain	COL1A1	-1.861	0.0441	Muller
ENSRNOG00000003899			-0.653	0.436
ENSRNOG00000003901	cilia and flagella associated protein 36	CFAP36	-0.409	5.33e-07	Muller
ENSRNOG00000003905	N-ethylmaleimide sensitive factor, vesicle fusing ATPase	NSF	0.302	3.7e-05	Bipolar
ENSRNOG00000003908	centrosomal protein 128	Cep128	-1.098	4.26e-20	Bipolar
ENSRNOG00000003915	proton activated chloride channel 1	PACC1	-0.016	0.947
ENSRNOG00000003917	uridine-cytidine kinase 2	UCK2	-0.098	0.614
ENSRNOG00000003918	solute carrier family 25 member 19	SLC25A19	-0.138	0.475	Microglia
ENSRNOG00000003919	ribosomal protein S6 kinase B1	RPS6KB1	-0.36	2.16e-05	Muller
ENSRNOG00000003923	RAB21, member RAS oncogene family	RAB21	0.406	4.65e-05
ENSRNOG00000003924	phosphatidylinositol 4-kinase type 2 beta	PI4K2B	0.335	0.198	Microglia
ENSRNOG00000003925	hedgehog acyltransferase	HHAT	0.262	0.662	Muller
ENSRNOG00000003927	CD55 molecule (Cromer blood group)	CD55	0.188	0.802
ENSRNOG00000003928	transmembrane and coiled-coil domains 1	TMCO1	0.19	0.188	Muller
ENSRNOG00000003929	protocadherin 19	PCDH19	0.52	0.00376
ENSRNOG00000003931	arylsulfatase G	ARSG	0.593	2.9e-15	Rods
ENSRNOG00000003936	PWWP domain containing 2A	Pwwp2a	-0.362	0.000388
ENSRNOG00000003942	asparagine synthetase domain containing 1	ASNSD1	-0.138	0.256	Muller
ENSRNOG00000003946	torsin 1A interacting protein 1	TOR1AIP1	-0.176	0.183
ENSRNOG00000003947	netrin 1	NTN1	-0.191	0.797	Bipolar
ENSRNOG00000003948	LLGL scribble cell polarity complex component 1	LLGL1	0.275	0.00933
ENSRNOG00000003949	phosphorylase kinase regulatory subunit alpha 2	PHKA2	0.126	0.822	Muller
ENSRNOG00000003950	laeverin	LVRN	-1.074	0.02
ENSRNOG00000003951	proteasome 26S subunit, ATPase 1	PSMC1	-0.112	0.107
ENSRNOG00000003953	RAB3 GTPase activating protein catalytic subunit 1	Rab3gap1	-0.088	0.267	Bipolar
ENSRNOG00000003954			-2.089	0.000141
ENSRNOG00000003955	spermatogenesis associated 7	SPATA7	-0.867	3.42e-17	Bipolar
ENSRNOG00000003956	Rho GTPase activating protein 6	ARHGAP6	0.475	0.518	Muller
ENSRNOG00000003958	COMM domain containing 10	COMMD10	0.319	0.00809	Muller
ENSRNOG00000003960	collectrin, amino acid transport regulator	CLTRN	0.314	0.476
ENSRNOG00000003964	NSE2 (MMS21) homolog, SMC5-SMC6 complex SUMO ligase	NSMCE2	-0.179	0.226	Bipolar
ENSRNOG00000003967	vacuole membrane protein 1	VMP1	-0.517	2.7e-08
ENSRNOG00000003969	FAM20A golgi associated secretory pathway pseudokinase	FAM20A	-0.398	0.692
ENSRNOG00000003970	transportin 2	TNPO2	-0.15	0.00647
ENSRNOG00000003971	golgi SNAP receptor complex member 1	GOSR1	-0.081	0.352
ENSRNOG00000003972	thyroid stimulating hormone receptor	TSHR	1.25	5.06e-19
ENSRNOG00000003973	cytochrome b5 reductase 1	CYB5R1	-0.058	0.795	Muller
ENSRNOG00000003975	profilin 1	PFN1	0.098	0.246
ENSRNOG00000003977			-0.942	4.94e-14
ENSRNOG00000003979	zinc finger RANBP2-type containing 3	ZRANB3	-0.222	0.199	Bipolar
ENSRNOG00000003980	tetratricopeptide repeat domain 1	TTC1	-0.211	0.0142	Muller
ENSRNOG00000003981	zinc finger protein 18	ZNF18	-0.148	0.375
ENSRNOG00000003983			0.211	0.0361
ENSRNOG00000003984	apelin	APLN	-0.821	0.00122	Muller
ENSRNOG00000003985	transmembrane protein 19	TMEM19	0.065	0.719
ENSRNOG00000003988	DnaJ heat shock protein family (Hsp40) member C27	DNAJC27	0.168	0.00223
ENSRNOG00000003990	growth factor receptor bound protein 2	GRB2	0.272	0.00077	Microglia
ENSRNOG00000003991	ankyrin and armadillo repeat containing	ANKAR	-0.042	0.958	Rods
ENSRNOG00000003992	phosphoinositide-3-kinase regulatory subunit 6	PIK3R6	0.837	0.0924
ENSRNOG00000003993			-0.562	0.00231
ENSRNOG00000003997	phospholipase D family member 5	PLD5	0.931	0.0552	Vascular
ENSRNOG00000003998	sarcoglycan alpha	SGCA	-0.918	0.101	Vascular
ENSRNOG00000003999	adenylate cyclase 3	ADCY3	0.514	1.38e-05
ENSRNOG00000004000	transcription elongation factor, mitochondrial	TEFM	-0.078	0.691
ENSRNOG00000004001	O-sialoglycoprotein endopeptidase like 1	OSGEPL1	-0.31	0.119
ENSRNOG00000004003	dual specificity phosphatase 10	DUSP10	0.786	2.57e-08	Rods
ENSRNOG00000004004	NRDE-2, necessary for RNA interference, domain containing	NRDE2	-0.442	1.56e-06
ENSRNOG00000004006	DnaJ heat shock protein family (Hsp40) member B9	DNAJB9	0.166	0.141
ENSRNOG00000004009	X-prolyl aminopeptidase 2	XPNPEP2	-0.614	0.43
ENSRNOG00000004011	NEDD1 gamma-tubulin ring complex targeting factor	NEDD1	-0.374	0.0493
ENSRNOG00000004013	glutamate receptor interacting protein 1	GRIP1	0.534	3.82e-11
ENSRNOG00000004014	charged multivesicular body protein 6	CHMP6	-0.158	0.194
ENSRNOG00000004016	MSL complex subunit 3	MSL3	-0.427	2.48e-05	Microglia
ENSRNOG00000004018	tudor domain containing 5	TDRD5	1.14	0.0806	Muller
ENSRNOG00000004019	pleckstrin homology like domain family A member 1	PHLDA1	0.748	4.24e-13	Muller
ENSRNOG00000004022	kelch domain containing 9	KLHDC9	0.633	0.0767
ENSRNOG00000004026	ATPase plasma membrane Ca2+ transporting 1	ATP2B1	0.041	0.469
ENSRNOG00000004027	aldehyde dehydrogenase 9 family member A1	ALDH9A1	0.696	2.04e-12	Muller
ENSRNOG00000004032	transmembrane protein 94	Tmem94	0.099	0.297	Bipolar
ENSRNOG00000004033	semaphorin 6A	SEMA6A	0.847	2.58e-17
ENSRNOG00000004035	KRR1 small subunit processome component homolog	KRR1	-0.602	2.17e-08
ENSRNOG00000004036	sorting nexin 12	SNX12	-0.195	0.0392
ENSRNOG00000004040	ATP binding cassette subfamily A member 8	ABCA8	0.21	0.272	Muller
ENSRNOG00000004048	leucine rich repeat kinase 2	LRRK2	0.426	0.00406
ENSRNOG00000004049	BAR/IMD domain containing adaptor protein 2	BAIAP2	0.526	9.61e-05
ENSRNOG00000004050	SNF related kinase	SNRK	-0.88	3.09e-24	Vascular
ENSRNOG00000004057	coiled-coil domain containing 88A	CCDC88A	-0.405	0.000179
ENSRNOG00000004059	peptidyl-tRNA hydrolase domain containing 1	PTRHD1	0.253	0.39	Muller
ENSRNOG00000004060	calmodulin 1	Calm1 (includes others)	0.346	2.72e-13
ENSRNOG00000004061	pinin, desmosome associated protein	PNN	-0.296	0.00846
ENSRNOG00000004062	complement component 4 binding protein alpha	C4BPA	0.535	0.611
ENSRNOG00000004063	SH3 and PX domains 2B	SH3PXD2B	0.865	0.000227	Muller
ENSRNOG00000004067	neuronal cell adhesion molecule	NRCAM	0.605	3.95e-17
ENSRNOG00000004068	nuclear receptor coactivator 1	NCOA1	-0.2	0.00487
ENSRNOG00000004072	myosin IC	MYO1C	0.032	0.831	Vascular
ENSRNOG00000004076	PMS1 homolog 1, mismatch repair system component	PMS1	-0.341	0.0121	Bipolar
ENSRNOG00000004077	potassium voltage-gated channel subfamily C member 2	KCNC2	0.55	5.44e-10	RGCs
ENSRNOG00000004078	enolase 3	ENO3	-0.049	0.822	Bipolar
ENSRNOG00000004083	zinc finger CCCH-type containing 14	ZC3H14	-0.472	1.03e-13	Bipolar
ENSRNOG00000004084	LRAT domain containing 1	LRATD1	0.393	0.343
ENSRNOG00000004085	T cell activation inhibitor, mitochondrial	TCAIM	-0.118	0.311
ENSRNOG00000004089	ectonucleotide pyrophosphatase/phosphodiesterase 2	ENPP2	1.916
ENSRNOG00000004090	protein arginine methyltransferase 1-like	LOC100361025	0.142	0.43
ENSRNOG00000004091	CWC25 spliceosome associated protein homolog	CWC25	-0.926	1.27e-27
ENSRNOG00000004092	similar to microfibrillar-associated protein 1	RGD1564148	-1.759	0.0874
ENSRNOG00000004093			-1.104	1.16e-50
ENSRNOG00000004094	prostaglandin E receptor 1	PTGER1	-0.389	0.000247	Amacrine
ENSRNOG00000004099	R3H domain containing 1	R3HDM1	-0.104	0.196
ENSRNOG00000004100	tribbles pseudokinase 1	TRIB1	-0.512	0.000723
ENSRNOG00000004101			2.922	0.0117
ENSRNOG00000004103	trafficking protein particle complex subunit 6B	TRAPPC6B	-0.013	0.917
ENSRNOG00000004104	zinc finger with KRAB and SCAN domains 7	ZKSCAN7	-0.362	0.00863
ENSRNOG00000004107	ribosomal protein L23	RPL23	-0.435	2.9e-07	Muller
ENSRNOG00000004109	zinc finger protein, FOG family member 2	ZFPM2	0.61	5.86e-06	Horizontal
ENSRNOG00000004110	tribbles pseudokinase 2	Trib2	-0.86	2.88e-46	Bipolar
ENSRNOG00000004111	sterol O-acyltransferase 1	SOAT1	0.938	9.82e-05	Microglia
ENSRNOG00000004112	chromosome 5 open reading frame 52	C5orf52	-0.212	0.741
ENSRNOG00000004118	FERM and PDZ domain containing 4	FRMPD4	0.703	0.000746	Horizontal
ENSRNOG00000004120	ring finger protein 138, retrogene 1	Rnf138rt1	-0.496	0.566
ENSRNOG00000004122	kringle containing transmembrane protein 2	KREMEN2	-0.959	0.286
ENSRNOG00000004125	complement component 4 binding protein beta	C4BPB	-0.221	0.43
ENSRNOG00000004127	centrosomal protein 170	CEP170	-0.064	0.568
ENSRNOG00000004130	anaphase promoting complex subunit 4	ANAPC4	-0.356	8.13e-05
ENSRNOG00000004131	protein kinase N1	PKN1	-0.012	0.91
ENSRNOG00000004132	LIM and SH3 protein 1	LASP1	0.719	3.23e-17
ENSRNOG00000004133	solute carrier family 7 member 3	SLC7A3	0.194	0.212	Muller
ENSRNOG00000004135	KIAA1143	KIAA1143	-0.077	0.677
ENSRNOG00000004137	ubiquitin domain containing 2	UBTD2	-0.048	0.781
ENSRNOG00000004139	nudE neurodevelopment protein 1 like 1	NDEL1	0.099	0.376	Bipolar
ENSRNOG00000004140	parkin coregulated like	PACRGL	-0.138	0.514	Muller
ENSRNOG00000004141	vasorin	VASN	0.769	6.26e-09	Muller
ENSRNOG00000004143	adiponectin receptor 1	ADIPOR1	-1.734	3.01e-155	Bipolar
ENSRNOG00000004144			0.081	0.887
ENSRNOG00000004145	prolyl-tRNA synthetase domain containing 1	Prorsd1	-0.607	0.00783
ENSRNOG00000004146	coronin 7	CORO7/CORO7-PAM16	-0.303	0.000204
ENSRNOG00000004147	ATP-binding cassette, sub-family A member 8a	Abca8a	0.082	0.681	Muller
ENSRNOG00000004148	cyclin dependent kinase 17	CDK17	0.502	4.37e-09	Muller
ENSRNOG00000004149	MGAT4 family member C	MGAT4C	0.463	0.0427	Bipolar
ENSRNOG00000004150	solute carrier family 9 member A7	Slc9a7	0.044	0.79	Amacrine
ENSRNOG00000004152	LDL receptor related protein 12	LRP12	-0.066	0.515
ENSRNOG00000004155	sterile alpha motif domain containing 14	SAMD14	0.61	8.58e-14	Amacrine
ENSRNOG00000004158	histone deacetylase 9	HDAC9	-0.476	8.53e-07
ENSRNOG00000004159	FLII actin remodeling protein	FLII	0.018	0.855
ENSRNOG00000004160	phosphoribosyl pyrophosphate synthetase 2	PRPS2	0.729	0.00205	Microglia
ENSRNOG00000004161	mitochondrial translational initiation factor 2	MTIF2	-0.564	3.37e-07
ENSRNOG00000004162	6-phosphofructo-2-kinase/fructose-2,6-biphosphatase 2	PFKFB2	-1.504	1.58e-81	Rods
ENSRNOG00000004165	protein kinase D1	PRKD1	-0.466	0.000149	Muller
ENSRNOG00000004168	solute carrier family 35 member E4	SLC35E4	-0.451	0.000156	Muller
ENSRNOG00000004169	fizzy and cell division cycle 20 related 1	FZR1	0.217	0.0398	Horizontal
ENSRNOG00000004171	dynein axonemal heavy chain 9	DNAH9	0.396	0.0578	Rods
ENSRNOG00000004172	pyruvate dehydrogenase kinase 2	PDK2	0.627	1.01e-11	Amacrine
ENSRNOG00000004177	myosin IA	MYO1A	-0.003	0.998
ENSRNOG00000004179	neurotensin	NTS	0.598	0.41
ENSRNOG00000004180			0.442	0.0089
ENSRNOG00000004181	SHH signaling and ciliogenesis regulator SDCCAG8	SDCCAG8	-0.345	0.0234
ENSRNOG00000004183	coiled-coil domain containing 59	CCDC59	-0.179	0.201
ENSRNOG00000004185	MON2 homolog, regulator of endosome-to-Golgi trafficking	MON2	-0.43	1.95e-11
ENSRNOG00000004186	sorting nexin 13	SNX13	-0.349	5.37e-05
ENSRNOG00000004188	stratifin like 1	Sfnl1	-0.691	0.563
ENSRNOG00000004189	DNA helicase B	HELB	0.376	3.21e-05	Muller
ENSRNOG00000004192	Rho GTPase activating protein 30	ARHGAP30	0.452	0.372	Microglia
ENSRNOG00000004193	kelch like family member 12	KLHL12	-0.649	2.46e-11	Amacrine
ENSRNOG00000004196	ribosomal protein S29	RPS29	-0.268	0.0224
ENSRNOG00000004198	syntaxin binding protein 6	STXBP6	0.558	0.00333	Muller
ENSRNOG00000004200	syntabulin	SYBU	0.385	8.72e-08
ENSRNOG00000004201	regulating synaptic membrane exocytosis 2	RIMS2	-1.136	3.68e-76
ENSRNOG00000004205	protein kinase domain containing, cytoplasmic	PKDCC	0.631	0.00213	Rods
ENSRNOG00000004206	glutaredoxin 5	GLRX5	-0.628	6.28e-06	Muller
ENSRNOG00000004207	EMAP like 5	EML5	-0.86	8.24e-25	Bipolar
ENSRNOG00000004208	cysteine rich transmembrane BMP regulator 1	CRIM1	1.139	0.18
ENSRNOG00000004212	F-box and WD repeat domain containing 9	FBXW9	-0.969	1.58e-14	Rods
ENSRNOG00000004214	ribosomal protein L26	RPL26	-0.474	1.99e-07	Microglia
ENSRNOG00000004217	serine/threonine kinase 10	STK10	0.749	1.57e-05	Microglia
ENSRNOG00000004218	kelch like family member 28	KLHL28	-0.657	3.57e-05
ENSRNOG00000004219	deoxyhypusine synthase	DHPS	-0.355	0.000108
ENSRNOG00000004220	estrogen receptor binding site associated antigen 9	EBAG9	0.226	0.022	Amacrine
ENSRNOG00000004221	leucine rich repeat containing G protein-coupled receptor 5	LGR5	0.589	5.67e-07
ENSRNOG00000004226	interleukin 1 receptor associated kinase 3	IRAK3	1.036	1.16e-07
ENSRNOG00000004229	tachykinin precursor 3	TAC3	-0.137	0.573
ENSRNOG00000004232	G2/M-phase specific E3 ubiquitin protein ligase	G2E3	-0.866	1.39e-11	Bipolar
ENSRNOG00000004234	alpha-1,6-mannosyl-glycoprotein 2-beta-N-acetylglucosaminyltransferase	MGAT2	-0.329	0.00703
ENSRNOG00000004239	ST13, Hsp70 interacting protein, pseudogene 2	St13-ps2	-0.305	0.513
ENSRNOG00000004242	DNA polymerase epsilon 2, accessory subunit	POLE2	-0.426	0.3
ENSRNOG00000004245	microsomal glutathione S-transferase 3	MGST3	0.582	6.56e-05	RGCs
ENSRNOG00000004246	sperm associated antigen 7	SPAG7	-0.148	0.21
ENSRNOG00000004249	toll like receptor 7	TLR7	1.205	0.000456	Microglia
ENSRNOG00000004252	eukaryotic translation initiation factor 3 subunit H	EIF3H	-0.064	0.617	Microglia
ENSRNOG00000004255	thiosulfate sulfurtransferase like domain containing 1	TSTD1	0.113	0.271	Muller
ENSRNOG00000004257	CTP synthase 2	CTPS2	0.323	0.000293
ENSRNOG00000004258	carbohydrate sulfotransferase 7	CHST7	-0.021	0.982	Muller
ENSRNOG00000004259	deoxyhypusine hydroxylase	DOHH	-0.194	0.141	RGCs
ENSRNOG00000004262	nuclear casein kinase and cyclin dependent kinase substrate 1	NUCKS1	0.55	0.281
ENSRNOG00000004263	integrator complex subunit 7	INTS7	-0.09	0.36	Bipolar
ENSRNOG00000004265	divergent protein kinase domain 2B	DIPK2B	-0.56	0.487
ENSRNOG00000004268	zinc finger protein 519	ZNF519	-0.551	8.79e-06	Bipolar
ENSRNOG00000004269	myelin transcription factor 1 like	MYT1L	0.542	6.5e-10
ENSRNOG00000004273	interferon induced transmembrane protein 1	Ifitm1	1.65	0.032	Vascular
ENSRNOG00000004275	EGF like domain multiple 6	EGFL6	-0.294	0.0974
ENSRNOG00000004276	integrin subunit alpha 3	ITGA3	0.424	9.41e-08
ENSRNOG00000004278	distal-less homeobox 3	DLX3	1.47	0.0154
ENSRNOG00000004279	adhesion G protein-coupled receptor A3	ADGRA3	0.729	0.000569
ENSRNOG00000004280	transcobalamin 2	TCN2	-0.928	1.26e-16
ENSRNOG00000004281	cordon-bleu WH2 repeat protein	COBL	1.016	1.75e-14	Muller
ENSRNOG00000004282			-0.367	0.0351
ENSRNOG00000004283	calmodulin binding transcription activator 2	CAMTA2	0.174	0.0836	Amacrine
ENSRNOG00000004284	BTG anti-proliferation factor 1	BTG1	-0.456	4.91e-05
ENSRNOG00000004287	WD repeat domain 83	WDR83	-0.26	0.0445
ENSRNOG00000004288	peptidyl-tRNA hydrolase 2	PTRH2	-0.37	0.00262
ENSRNOG00000004290	growth factor receptor bound protein 10	GRB10	-0.031	0.746	Rods
ENSRNOG00000004291	clathrin heavy chain	CLTC	0.105	0.0603
ENSRNOG00000004292	serine palmitoyltransferase small subunit A	SPTSSA	0.159	0.129	Bipolar
ENSRNOG00000004294	achaete-scute family bHLH transcription factor 1	ASCL1	1.421	0.0139
ENSRNOG00000004300	general transcription factor IIA subunit 1	GTF2A1	0.113	0.356	Rods
ENSRNOG00000004301	DDB1 and CUL4 associated factor 13	DCAF13	-0.524	1.8e-07
ENSRNOG00000004302	phenylalanine hydroxylase	PAH	0.648	0.41	Muller
ENSRNOG00000004303	TIMP metallopeptidase inhibitor 3	TIMP3	0.734	0.0703
ENSRNOG00000004304	synapse associated protein 1	SYAP1	0.054	0.691
ENSRNOG00000004305	ABL proto-oncogene 2, non-receptor tyrosine kinase	ABL2	-0.443	8.71e-06	Bipolar
ENSRNOG00000004306	zinc finger and BTB domain containing 39	ZBTB39	-0.295	0.00372
ENSRNOG00000004307	torsin family 3 member A	TOR3A	0.802	0.00162	Microglia
ENSRNOG00000004310	CASK interacting protein 2	CASKIN2	-0.123	0.426	Muller
ENSRNOG00000004311	G protein-coupled receptor 182	GPR182	-0.77	0.00024
ENSRNOG00000004312	transmembrane BAX inhibitor motif containing 4	TMBIM4	-0.102	0.471	Muller
ENSRNOG00000004314	protein phosphatase, Mg2+/Mn2+ dependent 1H	PPM1H	0.528	1.4e-11	Cones
ENSRNOG00000004316	LLP homolog, long-term synaptic facilitation factor	LLPH	-0.363	0.462	Microglia
ENSRNOG00000004317	vasoactive intestinal peptide receptor 2	VIPR2	0.66	6.8e-12	Muller
ENSRNOG00000004320	transglutaminase 4	TGM4	0.696	0.28
ENSRNOG00000004322	SH3 domain containing kinase binding protein 1	SH3KBP1	0.183	0.0891	Microglia
ENSRNOG00000004327	dopa decarboxylase	DDC	0.389	0.407	Rods
ENSRNOG00000004328	DEP domain containing MTOR interacting protein	DEPTOR	-0.294	0.258	Muller
ENSRNOG00000004330	chordin like 1	CHRDL1	0.65	2.01e-08	Muller
ENSRNOG00000004332	epidermal growth factor receptor	EGFR	0.868	2.88e-08	Muller
ENSRNOG00000004333	FLYWCH-type zinc finger 1	FLYWCH1	0.49	2.42e-11
ENSRNOG00000004337	FAM20B glycosaminoglycan xylosylkinase	FAM20B	0.027	0.813
ENSRNOG00000004339	YY1 transcription factor	YY1	-0.216	0.0222
ENSRNOG00000004341	chromosome 1 open reading frame 116	C1orf116	-1.095	0.179
ENSRNOG00000004342	aryl hydrocarbon receptor	AHR	-0.201	0.157	Rods
ENSRNOG00000004344	zinc finger DHHC-type palmitoyltransferase 3	ZDHHC3	0.034	0.712	RGCs
ENSRNOG00000004345	dishevelled associated activator of morphogenesis 1	DAAM1	0.009	0.946
ENSRNOG00000004346	notch receptor 3	NOTCH3	0.388	0.0252	Vascular
ENSRNOG00000004351	solute carrier family 25 member 29	SLC25A29	-0.678	6.25e-06	Rods
ENSRNOG00000004353	PTPRF interacting protein alpha 2	PPFIA2	-0.091	0.223
ENSRNOG00000004359	tryptophanyl-tRNA synthetase 1	WARS1	-0.027	0.841
ENSRNOG00000004360	gem nuclear organelle associated protein 2	GEMIN2	-0.701	9.9e-09
ENSRNOG00000004361	poly(ADP-ribose) polymerase family member 10	PARP10	0.961	0.00105
ENSRNOG00000004362	ribosomal protein S6 kinase A5	Rps6ka5	0.176	0.0548	Bipolar
ENSRNOG00000004364	BRISC and BRCA1 A complex member 2	BABAM2	0.006	0.962
ENSRNOG00000004367	ETS transcription factor ELK3	ELK3	1.156	7.88e-09
ENSRNOG00000004372	cerebellin 4 precursor	CBLN4	0.003	0.989	Amacrine
ENSRNOG00000004373	DExD-box helicase 39A	DDX39A	-0.229	0.0855
ENSRNOG00000004377	lipin 1	LPIN1	-0.291	0.000671
ENSRNOG00000004378	ATP binding cassette subfamily A member 5	ABCA5	0.283	0.00562	Bipolar
ENSRNOG00000004382	apoptosis resistant E3 ubiquitin protein ligase 1	AREL1	-0.001	0.99	Amacrine
ENSRNOG00000004387			-0.097	0.726
ENSRNOG00000004392	apoptosis associated tyrosine kinase	AATK	0.738	5.18e-17	Bipolar
ENSRNOG00000004395	F-box and WD repeat domain containing 11	Fbxw11	0.476	9.23e-11	Vascular
ENSRNOG00000004398	PKHD1 like 1	PKHD1L1	0.491	0.702	Vascular
ENSRNOG00000004399	distal-less homeobox 4	DLX4	0.857	0.205
ENSRNOG00000004400	arginine vasopressin receptor 1A	AVPR1A	0.899	0.297	Muller
ENSRNOG00000004401	mitochondrial ribosomal protein L13	MRPL13	-0.033	0.837
ENSRNOG00000004402	lysophosphatidylglycerol acyltransferase 1	LPGAT1	-0.566	1.26e-15	Bipolar
ENSRNOG00000004403	solute carrier family 25 member 32	SLC25A32	-0.266	0.0725
ENSRNOG00000004405	polymeric immunoglobulin receptor	PIGR	-2.078	0.0569
ENSRNOG00000004409	SAM and SH3 domain containing 3	SASH3	0.541	0.335	Microglia
ENSRNOG00000004410	paired box 6	PAX6	0.793	9.4e-45	Amacrine
ENSRNOG00000004411	tetraspanin 8	TSPAN8	0.33	0.608	Muller
ENSRNOG00000004412	MDM2 binding protein	MTBP	-0.52	0.038
ENSRNOG00000004414	F11 receptor	F11R	-0.011	0.978
ENSRNOG00000004415	TOG array regulator of axonemal microtubules 1	TOGARAM1	-0.739	6.04e-19
ENSRNOG00000004417	family with sequence similarity 117 member A	FAM117A	0.958	1.83e-11	Bipolar
ENSRNOG00000004420	RAD21 cohesin complex component	RAD21	-0.098	0.0697
ENSRNOG00000004421	ribitol xylosyltransferase 1	RXYLT1	0.062	0.72
ENSRNOG00000004423	zinc finger and BTB domain containing 18	ZBTB18	-0.779	1.61e-22	Muller
ENSRNOG00000004424	RAB interacting factor	RABIF	-0.011	0.96
ENSRNOG00000004425	kelch domain containing 1	KLHDC1	0.014	0.936	Muller
ENSRNOG00000004426	ribosomal protein S27a	RPS27A	-0.283	0.0014	Microglia
ENSRNOG00000004430	centrosomal protein 131	CEP131	-0.167	0.145	Vascular
ENSRNOG00000004437	mitogen-activated protein kinase kinase 6	MAP2K6	-0.07	0.639	Muller
ENSRNOG00000004438	contactin 1	CNTN1	0.698	3.39e-21
ENSRNOG00000004440	fidgetin like 1	FIGNL1	-0.894	0.0402	Bipolar
ENSRNOG00000004442	D-glutamate cyclase	DGLUCY	0.769	0.00288
ENSRNOG00000004444	IKAROS family zinc finger 1	Ikzf1	0.86	0.0933	Microglia
ENSRNOG00000004448	acyl-CoA synthetase short chain family member 3	ACSS3	0.541	0.000816	Muller
ENSRNOG00000004449	E2F transcription factor 6	E2F6	0.029	0.784	Bipolar
ENSRNOG00000004453			-0.08	0.93
ENSRNOG00000004458	stonin 2	STON2	0.398	0.0138	Muller
ENSRNOG00000004461	FLYWCH family member 2	FLYWCH2	0.202	0.401	RGCs
ENSRNOG00000004464	SEL1L adaptor subunit of SYVN1 ubiquitin ligase	SEL1L	-0.509	4.76e-18
ENSRNOG00000004466	family with sequence similarity 210 member B	FAM210B	0.494	0.024
ENSRNOG00000004471	RNA polymerase III subunit H	POLR3H	-0.255	0.0762	Muller
ENSRNOG00000004473	PPARG coactivator 1 alpha	PPARGC1A	-1.448	3.41e-38	Amacrine
ENSRNOG00000004474	kelch domain containing 2	KLHDC2	-0.158	0.0147
ENSRNOG00000004476	WNT inhibitory factor 1	WIF1	-1.309	7.81e-06	Muller
ENSRNOG00000004477	ubiquitin like domain containing CTD phosphatase 1	UBLCP1	-0.552	1.14e-07	Amacrine
ENSRNOG00000004479	aurora kinase A	AURKA	0.051	0.886
ENSRNOG00000004481	adenylosuccinate synthase 2	ADSS2	0.38	2.95e-06
ENSRNOG00000004482	coiled-coil domain containing 88C	CCDC88C	0.414	0.0539	Muller
ENSRNOG00000004483	protein tyrosine phosphatase receptor type R	PTPRR	0.297	0.0606
ENSRNOG00000004487	NIMA-related kinase 2	Nek2	-1.035	0.0106
ENSRNOG00000004489	adhesion G protein-coupled receptor E5	ADGRE5	-0.601	0.0758
ENSRNOG00000004492	mitochondrial transcription termination factor 3	MTERF3	-0.01	0.958
ENSRNOG00000004493	taspase 1	TASP1	-0.937	2.82e-07	Bipolar
ENSRNOG00000004494	leukotriene A4 hydrolase	LTA4H	-0.397	2.78e-05
ENSRNOG00000004496	Rho associated coiled-coil containing protein kinase 2	ROCK2	-0.174	0.022	Muller
ENSRNOG00000004499	G protein-coupled receptor 135	GPR135	-0.036	0.932	Muller
ENSRNOG00000004500	MYC proto-oncogene, bHLH transcription factor	MYC	0.761	0.0893	Microglia
ENSRNOG00000004503	trans-L-3-hydroxyproline dehydratase	L3HYPDH	-0.745	0.000665	Horizontal
ENSRNOG00000004505	nuclear factor I C	NFIC	0.351	0.000489
ENSRNOG00000004509	E2F associated phosphoprotein	EAPP	-0.091	0.501	Muller
ENSRNOG00000004510	solute carrier family 35 member B1	SLC35B1	-0.282	0.00115
ENSRNOG00000004512	apolipoprotein O like	APOOL	-0.538	0.00107	Bipolar
ENSRNOG00000004515	pescadillo ribosomal biogenesis factor 1	PES1	-0.294	0.000279	Muller
ENSRNOG00000004516	integrin subunit beta like 1	ITGBL1	0.284	0.431
ENSRNOG00000004517	insulin like growth factor 1	IGF1	-0.106	0.585	Bipolar
ENSRNOG00000004518	calcium voltage-gated channel auxiliary subunit beta 1	Cacnb1	0.357	0.000817
ENSRNOG00000004519	autophagy related 2B	Atg2b	0.114	0.125
ENSRNOG00000004520	dynein 2 intermediate chain 1	DYNC2I1	-1.16	2.37e-50
[truncated: 14,174 more rows]

## Sheet: RCS Pathway Enrichment
Â© 2000-2024 QIAGEN. All rights reserved.
Ingenuity Canonical Pathways	-log(p-value)	Ratio	z-score
Visual phototransduction	17.8	0.467	-4.158
Phagosome Formation	12.6	0.136	5.157
Phototransduction Pathway	11.6	0.389	NaN
S100 Family Signaling Pathway	11.1	0.127	6.061
G-Protein Coupled Receptor Signaling	10.1	0.127	4.477
Neuroinflammation Signaling Pathway	9.97	0.164	4.422
CREB Signaling in Neurons	9.55	0.13	4.331
BBSome Signaling Pathway	9.52	0.139	2.668
Pathogen Induced Cytokine Storm Signaling Pathway	9.27	0.151	4.543
Cardiac Hypertrophy Signaling (Enhanced)	9.15	0.133	3.81
Interleukin-10 signaling	8.31	0.356	3.5
TREM1 Signaling	8.3	0.273	3.71
IL-27 Signaling Pathway	7.8	0.211	1.732
IL-10 Signaling	7.75	0.195	-1.461
Integrin cell surface interactions	7.47	0.247	1.091
PI3K/AKT Signaling	7.14	0.17	1.155
Caveolar-mediated Endocytosis Signaling	7.01	0.253	NaN
Myelination Signaling Pathway	6.8	0.141	2.654
Neutrophil degranulation	6.2	0.122	4.464
STAT3 Pathway	6.14	0.185	4.243
Pyroptosis Signaling Pathway	6.02	0.213	4.025
Interferon alpha/beta signaling	5.96	0.239	3.153
Cilium Assembly	5.96	0.157	-4.243
IL-12 Signaling and Production in Macrophages	5.91	0.149	-0.169
Regulation of Cellular Mechanics by Calpain Protease	5.69	0.211	-0.378
ISGylation Signaling Pathway	5.61	0.194	4.146
cAMP-mediated signaling	5.43	0.144	1.257
White Adipose Tissue Browning Pathway	5.42	0.174	1.091
RAR Activation	5.23	0.119	-0.42
Extracellular matrix organization	5.17	0.189	0.894
Toll-like Receptor Cascades	4.98	0.323	1.897
FAK Signaling	4.91	0.0951	5.93
Platelet Adhesion to exposed collagen	4.85	0.467	0.378
Interferon gamma signaling	4.8	0.191	2.828
ID1 Signaling Pathway	4.74	0.144	2.043
Transport of inorganic cations/anions and amino acids/oligopeptides	4.73	0.183	-0.688
PTEN Signaling	4.73	0.159	-1.807
IL-17A Signaling in Fibroblasts	4.69	0.195	1.698
G alpha (i) signalling events	4.59	0.132	1.029
Activin Inhibin Signaling Pathway	4.48	0.138	2.191
Crosstalk between Dendritic Cells and Natural Killer Cells	4.43	0.187	3.606
RHOGDI Signaling	4.41	0.136	-1.807
Interleukin-4 and Interleukin-13 signaling	4.38	0.173	2.982
Surfactant metabolism	4.35	0.348	-1.414
Macrophage Alternative Activation Signaling Pathway	4.34	0.142	2.117
HGF Signaling	4.22	0.159	1.667
LXR/RXR Activation	4.19	0.163	-2.828
Toll-like Receptor Signaling	4.13	0.192	3.317
Acute Phase Response Signaling	4.12	0.141	2.5
Signaling by Rho Family GTPases	3.93	0.124	2.065
Sperm Motility	3.89	0.125	-0.707
Ephrin Receptor Signaling	3.88	0.134	-0.277
Leukocyte Extravasation Signaling	3.82	0.135	1.147
Class A/1 (Rhodopsin-like receptors)	3.81	0.117	3.781
Th1 and Th2 Activation Pathway	3.81	0.14	NaN
Sertoli Cell-Sertoli Cell Junction Signaling	3.62	0.123	2.556
Role of Pattern Recognition Receptors in Recognition of Bacteria and Viruses	3.61	0.141	3.051
NOD1/2 Signaling Pathway	3.57	0.132	3.8
Neutrophil Extracellular Trap Signaling Pathway	3.52	0.107	1.372
Complement System	3.48	0.243	0.816
TR/RXR Activation	3.48	0.148	-0.229
Regulation of lipid metabolism by PPARalpha	3.43	0.151	-2.357
Semaphorin Neuronal Repulsive Signaling Pathway	3.43	0.14	-0.728
GÎ±i Signaling	3.41	0.143	2
Glucocorticoid Receptor Signaling	3.39	0.0979	NaN
Trehalose Degradation II (Trehalase)	3.36	0.571	NaN
Other interleukin signaling	3.33	0.292	1.89
Interleukin-6 family signaling	3.33	0.292	1.89
Actin Nucleation by ARP-WASP Complex	3.25	0.161	0
Pulmonary Healing Signaling Pathway	3.23	0.126	3
Granulocyte Adhesion and Diapedesis	3.19	0.127	NaN
Role of PKR in Interferon Induction and Antiviral Response	3.15	0.14	2.84
Platelet Aggregation (Plug Formation)	3.12	0.385	-0.447
CLEAR Signaling Pathway	3.09	0.112	-2.694
ERK/MAPK Signaling	3.08	0.121	1.5
Paxillin Signaling	3.06	0.15	0.378
Wound Healing Signaling Pathway	3.02	0.115	2.414
Inflammasome pathway	3	0.3	2.449
Syndecan interactions	3	0.259	0.378
Apelin Liver Signaling Pathway	3	0.259	-0.378
Role of JAK family kinases in IL-6-type Cytokine Signaling	2.98	0.165	3.051
Glycosaminoglycan metabolism	2.93	0.163	0.832
Opioid Signaling Pathway	2.91	0.111	1.177
Natural Killer Cell Signaling	2.91	0.121	2.041
Response to elevated platelet cytosolic Ca2+	2.89	0.136	2.828
Necroptosis Signaling Pathway	2.84	0.129	1.789
Macrophage Classical Activation Signaling Pathway	2.83	0.122	1.043
IL-15 Production	2.82	0.138	3.153
Axonal Guidance Signaling	2.82	0.0961	NaN
TWEAK Signaling	2.79	0.216	0.707
CDX Gastrointestinal Cancer Signaling Pathway	2.79	0.119	-1.633
Th2 Pathway	2.7	0.131	1.5
NLR signaling pathways	2.68	0.179	2.53
Heme signaling	2.68	0.191	2.121
Prostanoid Biosynthesis	2.65	0.4	1
Death Receptor Signaling	2.64	0.146	1.604
Formation of Fibrin Clot (Clotting Cascade)	2.64	0.205	0.707
Antigen Presentation Pathway	2.64	0.205	NaN
Circadian Rhythm Signaling	2.61	0.108	NaN
Virus Entry via Endocytic Pathways	2.6	0.136	NaN
Oxytocin Signaling Pathway	2.57	0.106	-0.557
IL-8 Signaling	2.56	0.114	2.982
Agranulocyte Adhesion and Diapedesis	2.56	0.114	NaN
FXR/RXR Activation	2.55	0.118	-2.132
Type II Diabetes Mellitus Signaling	2.54	0.124	1.667
TNFR2 Signaling	2.53	0.219	0
Glycerophospholipid biosynthesis	2.52	0.141	-1.069
Human Embryonic Stem Cell Pluripotency	2.49	0.114	3.128
GDP-glucose Biosynthesis	2.47	0.364	NaN
Th1 Pathway	2.46	0.131	4
Immunogenic Cell Death Signaling Pathway	2.46	0.144	2.496
G alpha (12/13) signalling events	2.44	0.15	1.155
Ceramide Signaling	2.41	0.143	1.265
Role of JAK2 in Hormone-like Cytokine Signaling	2.35	0.161	1.265
Eicosanoid Signaling	2.34	0.104	1.3
Apoptosis Signaling	2.32	0.135	1.069
GP1b-IX-V activation signalling	2.32	0.333	-1
Glucose and Glucose-1-phosphate Degradation	2.32	0.333	NaN
Transport of bile salts and organic acids, metal ions and amine compounds	2.31	0.145	0.577
GPVI-mediated activation cascade	2.3	0.2	1.134
NFE2L2 regulating anti-oxidant/detoxification enzymes	2.3	0.263	0.447
Iron homeostasis signaling pathway	2.29	0.123	NaN
NAD Signaling Pathway	2.25	0.119	0.471
Neuregulin Signaling	2.25	0.128	NaN
PAK Signaling	2.25	0.128	0.447
Transcriptional Regulatory Network in Embryonic Stem Cells	2.21	0.116	3.441
Erythropoietin Signaling Pathway	2.2	0.114	-1.147
Glutaminergic Receptor Signaling Pathway (Enhanced)	2.19	0.0985	-0.354
Factors Promoting Cardiogenesis in Vertebrates	2.19	0.118	0.5
Trafficking and processing of endosomal TLR	2.18	0.308	2
POU5F1 (OCT4), SOX2, NANOG activate genes related to proliferation	2.18	0.308	2
UDP-N-acetyl-D-galactosamine Biosynthesis II	2.18	0.308	NaN
MSP-RON Signaling in Macrophages Pathway	2.18	0.126	1.069
Docosahexaenoic Acid (DHA) Signaling	2.18	0.104	-1.177
ILK Signaling	2.17	0.109	0.655
MyD88-independent TLR4 cascade	2.17	0.189	2.646
Glutamate Receptor Signaling	2.15	0.152	NaN
p38 MAPK Signaling	2.14	0.125	2.138
Cachexia Signaling Pathway	2.11	0.0951	4.226
CD40 Signaling	2.11	0.149	1.667
Regulation of TLR by endogenous ligand	2.1	0.238	0.447
MyD88 dependent cascade initiated on endosome	1.97	0.194	2.449
Lactose synthesis	1.96	0.667	NaN
FAT10 Cancer Signaling Pathway	1.96	0.16	1.134
GÎ±s Signaling	1.96	0.119	1
Synthesis of Prostaglandins (PG) and Thromboxanes (TX)	1.94	0.267	1
Regulation of Actin-based Motility by Rho	1.94	0.122	-0.447
Cell surface interactions at the vascular wall	1.94	0.104	2.558
Oxytocin in Brain Signaling Pathway	1.93	0.106	-1.147
GP6 Signaling Pathway	1.93	0.118	1.069
Transport of vitamins, nucleosides, and related molecules	1.92	0.171	-0.378
TNFR1 Signaling	1.91	0.157	1.134
Toll Like Receptor 3 (TLR3) Cascade	1.9	0.188	2.449
Phagosome Maturation	1.89	0.11	NaN
Corticotropin Releasing Hormone Signaling	1.89	0.112	0.535
IL-6 Signaling	1.87	0.116	3.357
DAP12 interactions	1.86	0.167	1.89
Immunoregulatory interactions between a Lymphoid and a non-Lymphoid cell	1.86	0.104	2.4
Tumoricidal Function of Hepatic Natural Killer Cells	1.85	0.208	NaN
Signal amplification	1.84	0.182	0
Caspase activation via Death Receptors in the presence of ligand	1.84	0.25	2
Signal regulatory protein family interactions	1.84	0.25	0
Post-translational protein phosphorylation	1.83	0.121	1.941
PD-1, PD-L1 cancer immunotherapy pathway	1.83	0.121	-1.387
HMGB1 Signaling	1.81	0.108	2.496
Relaxin Signaling	1.81	0.11	-0.707
FGF Signaling	1.78	0.128	2.53
Neurovascular Coupling Signaling Pathway	1.76	0.0991	-0.426
Signaling by Retinoic Acid	1.76	0.159	-0.378
FOXO-mediated transcription of cell cycle genes	1.74	0.235	0
Sensory processing of sound by outer hair cells of the cochlea	1.72	0.145	-0.707
Coagulation System	1.72	0.171	1.633
Sleep REM Signaling Pathway	1.71	0.117	-0.832
Interleukin-20 family signaling	1.7	0.192	2.236
IL-17A Signaling in Gastric Cells	1.7	0.192	NaN
Neurotransmitter uptake and metabolism In glial cells	1.68	0.5	NaN
Regulation of Insulin-like Growth Factor (IGF) transport and uptake by IGFBPs	1.68	0.113	2.138
Triacylglycerol Biosynthesis	1.68	0.143	-1.633
Synaptic Long Term Depression	1.68	0.101	-0.688
RHO GTPase cycle	1.67	0.0867	1.121
Neurotrophin/TRK Signaling	1.67	0.128	1.414
Collagen biosynthesis and modifying enzymes	1.66	0.134	-1
Interferon Signaling	1.66	0.167	2.236
Endocannabinoid Neuronal Synapse Pathway	1.66	0.107	0
RORA activates gene expression	1.65	0.222	-2
Nicotinate metabolism	1.65	0.222	0
RAC Signaling	1.65	0.109	0.447
G alpha (q) signalling events	1.65	0.103	0.943
WNT/Î²-catenin Signaling	1.65	0.103	1.291
BMAL1:CLOCK,NPAS2 activates circadian gene expression	1.64	0.185	-0.447
Fatty acyl-CoA biosynthesis	1.64	0.185	-1.342
TNF signaling	1.63	0.14	-0.707
Signaling by MET	1.63	0.127	0
iNOS Signaling	1.61	0.149	2.646
Integration of energy metabolism	1.6	0.117	0.707
Endocannabinoid Developing Neuron Pathway	1.6	0.11	1.155
Sensory processing of sound by inner hair cells of the cochlea	1.59	0.13	-1
Ketogenesis	1.57	0.273	NaN
CDP-diacylglycerol Biosynthesis I	1.57	0.179	-2
AMPK Signaling	1.57	0.095	0.302
Production of Nitric Oxide and Reactive Oxygen Species in Macrophages	1.56	0.0995	2.982
LPS/IL-1 Mediated Inhibition of RXR Function	1.54	0.0934	2.714
Regulation of the Epithelial Mesenchymal Transition by Growth Factors Pathway	1.54	0.099	3.638
PFKFB4 Signaling Pathway	1.52	0.143	0
Stearate Biosynthesis I (Animals)	1.52	0.127	-0.816
Gap Junction Signaling	1.52	0.0892	-0.186
TNFs bind their physiological receptors	1.51	0.172	2.236
Acetylcholine Receptor Signaling Pathway	1.5	0.0979	0.688
PPAR Signaling	1.49	0.112	-3.464
Assembly of collagen fibrils and other multimeric structures	1.48	0.131	-0.707
NCAM signaling for neurite out-growth	1.48	0.131	-0.707
FasL/ CD95L signaling	1.47	0.4	NaN
Signaling by MST1	1.47	0.4	NaN
Lysine Degradation V	1.47	0.4	NaN
Reversible hydration of carbon dioxide	1.47	0.25	NaN
Transcriptional regulation by RUNX3	1.46	0.115	1.265
IL-1 Signaling	1.46	0.115	2.449
Protein Kinase A Signaling	1.46	0.0852	-0.408
Insulin Secretion Signaling Pathway	1.46	0.0909	1.606
Activation of kainate receptors upon glutamate binding	1.45	0.167	-1.342
FOXO-mediated transcription of oxidative stress, metabolic and neuronal genes	1.45	0.167	-0.447
Phosphatidylglycerol Biosynthesis II (Non-plastidic)	1.45	0.167	-2
Sertoli Cell-Germ Cell Junction Signaling Pathway (Enhanced)	1.44	0.0932	3.411
Ribonucleotide Reductase Signaling Pathway	1.44	0.0994	2
Regulation of eIF4 and p70S6K Signaling	1.44	0.0978	0.816
Protein folding	1.4	0.112	-0.302
Signaling by CSF1 (M-CSF) in myeloid cells	1.4	0.161	2.236
Dissolution of Fibrin Clot	1.37	0.231	NaN
Mitochondrial biogenesis	1.37	0.125	-2.121
April Mediated Signaling	1.37	0.143	0.816
Role of NANOG in Mammalian Embryonic Stem Cell Pluripotency	1.37	0.105	2.449
Chaperone Mediated Autophagy	1.36	0.182	0
Macropinocytosis Signaling	1.35	0.118	1.342
RIPK1-mediated regulated necrosis	1.35	0.156	1.342
HOTAIR Regulatory Pathway	1.34	0.0982	2.324
Oncostatin M Signaling	1.32	0.14	2.449
Retinoate Biosynthesis I	1.32	0.14	-1
Synthesis of Lipoxins (LX)	1.31	0.333	NaN
Autophagy	1.31	0.0922	0.229
WNT/Ca+ pathway	1.3	0.121	-0.378
Phase I - Functionalization of compounds	1.3	0.108	-0.302
Beta-catenin independent WNT signaling	1.3	0.108	-1.265
Carnitine metabolism	1.29	0.214	NaN
Urate Biosynthesis/Inosine 5'-phosphate Degradation	1.29	0.214	NaN
Elastic fibre formation	1.28	0.136	0
TAK1-dependent IKK and NF-kappa-B activation	1.28	0.136	2.449
Collagen chain trimerization	1.28	0.136	-0.816
Retinoid metabolism and transport	1.28	0.136	0.816
Serotonin Receptor Signaling	1.27	0.081	0.973
IL-13 Signaling Pathway	1.26	0.103	1.732
PPARÎ±/RXRÎ± Activation	1.25	0.0928	-1.604
Signaling by NOTCH2	1.25	0.147	0.447
4-1BB Signaling in T Lymphocytes	1.25	0.147	1
Mouse Embryonic Stem Cell Pluripotency	1.25	0.106	2.714
Arachidonic acid metabolism	1.24	0.133	0
RAF/MAP kinase cascade	1.24	0.0878	2.711
The Visual Cycle	1.24	0.167	-2
Cell junction organization	1.24	0.109	-0.632
Thio-molybdenum Cofactor Biosynthesis	1.21	1	NaN
Chemokine Signaling	1.21	0.111	0.333
Transcriptional Regulation by NPAS4	1.21	0.143	1
Cytosolic sensors of pathogen-associated DNA	1.2	0.13	2.449
Interleukin-2 family signaling	1.2	0.13	1.633
tRNA Splicing	1.2	0.13	-1.342
WNK Renal Signaling Pathway	1.2	0.104	-0.378
G alpha (s) signalling events	1.19	0.0966	-1.069
Epithelial-Mesenchymal Transition (EMT) during gastrulation	1.19	0.286	NaN
MSP-RON Signaling Pathway	1.18	0.121	NaN
Integrin Signaling	1.17	0.0896	1.147
Striated Muscle Contraction	1.16	0.139	-2.236
Circadian Clock	1.15	0.119	-2.646
Bile Acid Biosynthesis, Neutral Pathway	1.14	0.188	NaN
Class B/2 (Secretin family receptors)	1.14	0.104	-1.265
Apelin Muscle Signaling Pathway	1.13	0.125	NaN
WNT/SHH Axonal Guidance Signaling Pathway	1.11	0.094	1.604
Actin Cytoskeleton Signaling	1.1	0.0861	-0.632
Extra-nuclear estrogen signaling	1.09	0.11	0.707
Kinesins	1.09	0.115	-1.134
O-linked glycosylation	1.09	0.0991	-0.302
Integrin signaling	1.09	0.148	2
Notch Signaling	1.08	0.132	NaN
Interleukin-17 signaling	1.08	0.25	NaN
Sphingomyelin Metabolism	1.08	0.25	NaN
Transcriptional regulation of pluripotent stem cells	1.08	0.176	NaN
Germ layer formation at gastrulation	1.08	0.176	NaN
1D-myo-inositol Hexakisphosphate Biosynthesis II (Mammalian)	1.08	0.176	NaN
D-myo-inositol (1,3,4)-trisphosphate Biosynthesis	1.08	0.176	NaN
ERK5 Signaling	1.07	0.108	1.134
Calcium Signaling	1.05	0.0864	-0.775
Adipogenesis pathway	1.05	0.0935	0.277
p75 NTR receptor-mediated signalling	1.05	0.1	1.897
Signaling by ALK	1.04	0.143	1
Tight Junction Signaling	1.04	0.0889	NaN
Transcriptional regulation by RUNX2	1.03	0.118	0
Antioxidant Action of Vitamin C	1.02	0.0965	0
Formation of definitive endoderm	1.02	0.167	NaN
Regulation of the Epithelial-Mesenchymal Transition Pathway	1.02	0.0872	NaN
Plasma lipoprotein assembly, remodeling, and clearance	1.01	0.105	0
Neurotransmitter release cycle	1.01	0.125	-0.447
Interleukin-1 processing	0.987	0.222	NaN
Lysine catabolism	0.987	0.222	NaN
OAS antiviral response	0.987	0.222	NaN
Interleukin-9 signaling	0.987	0.222	NaN
Lipophagy	0.987	0.222	NaN
Leucine Degradation I	0.987	0.222	NaN
Opioid Signalling	0.983	0.1	-0.707
Potassium Channels	0.982	0.0971	-1.265
Cardiac conduction	0.971	0.0923	-0.333
Signaling by TGF-beta Receptor Complex	0.969	0.113	0
NF-ÎºB Activation by Viruses	0.965	0.103	1.89
Purine Nucleotides Degradation II (Aerobic)	0.962	0.158	NaN
Mitochondrial L-carnitine Shuttle Pathway	0.962	0.158	NaN
Apelin Adipocyte Signaling Pathway	0.961	0.0989	1.134
IL-33 Signaling Pathway	0.959	0.0865	1.5
Ferroptosis Signaling Pathway	0.952	0.0916	-0.577
Degradation of the extracellular matrix	0.95	0.106	1.89
ESR-mediated signaling	0.946	0.0932	1.897
Dopamine-DARPP32 Feedback in cAMP Signaling	0.944	0.086	-0.333
Adrenergic Receptor Signaling Pathway (Enhanced)	0.942	0.085	-1.698
ABRA Signaling Pathway	0.94	0.0978	-0.333
Senescence Pathway	0.939	0.0803	1.147
Acetone Degradation I (to Methylglyoxal)	0.938	0.119	NaN
Synaptic Long Term Potentiation	0.935	0.0909	1.265
IL-17 Signaling	0.93	0.0856	3.5
IL-17A Signaling in Airway Cells	0.925	0.104	1.633
UDP-D-xylose and UDP-D-glucuronate Biosynthesis	0.921	0.5	NaN
Choline Degradation I	0.921	0.5	NaN
Xanthine and Xanthosine Salvage	0.921	0.5	NaN
Threonine Degradation II	0.921	0.5	NaN
Bile acid and bile salt metabolism	0.914	0.129	0
Methylglyoxal Degradation III	0.914	0.129	NaN
Intrinsic Pathway for Apoptosis	0.911	0.109	0
Sphingosine-1-phosphate Signaling	0.909	0.0917	-0.302
ATF6 (ATF6-alpha) activates chaperone genes	0.908	0.2	NaN
Ketone body metabolism	0.908	0.2	NaN
Ketolysis	0.908	0.2	NaN
HEY1 Signaling Pathway	0.905	0.087	1.069
B Cell Activating Factor Signaling	0.905	0.116	NaN
Signaling by VEGF	0.883	0.0926	2.333
G-protein beta:gamma signalling	0.877	0.125	-1
Thrombin signalling through proteinase activated receptors (PARs)	0.877	0.125	-1
Role of JAK1 and JAK3 in Î³c Cytokine Signaling	0.875	0.101	NaN
Regulation of mRNA stability by proteins that bind AU-rich elements	0.874	0.114	0.447
MIF Regulation of Innate Immunity	0.874	0.114	1.342
GNRH Signaling	0.873	0.0838	1.897
Neurexins and neuroligins	0.857	0.105	0
GM-CSF Signaling	0.852	0.1	2.449
Estrogen Receptor Signaling	0.852	0.0758	1.177
Neurotransmitter receptors and postsynaptic signal transmission	0.838	0.182	NaN
Erythrocytes take up carbon dioxide and release oxygen	0.838	0.182	NaN
Aspartate and asparagine metabolism	0.838	0.182	NaN
Clathrin-mediated Endocytosis Signaling	0.834	0.0817	NaN
Signaling by PDGF	0.832	0.103	0
L1CAM interactions	0.822	0.088	0.905
UVA-Induced MAPK Signaling	0.819	0.0918	NaN
Interconversion of nucleotide di- and triphosphates	0.819	0.136	NaN
Superpathway of D-myo-inositol (1,4,5)-trisphosphate Metabolism	0.819	0.136	NaN
Pregnenolone Biosynthesis	0.819	0.136	NaN
Role of OCT4 in Mammalian Embryonic Stem Cell Pluripotency	0.815	0.109	NaN
Late endosomal microautophagy	0.807	0.118	-1
CGAS-STING Signaling Pathway	0.803	0.0857	2.887
Hedgehog 'on' state	0.791	0.093	1.414
ROBO SLIT Signaling Pathway	0.789	0.0866	-0.905
Apelin Endothelial Signaling Pathway	0.788	0.0851	1.134
Retinoic acid Mediated Apoptosis Signaling	0.783	0.1	2.236
RAF-independent MAPK1/3 activation	0.777	0.13	NaN
Mineralocorticoid Biosynthesis	0.776	0.167	NaN
GÎ±q Signaling	0.775	0.0824	0.905
IL-9 Signaling	0.774	0.114	1
Synaptogenesis Signaling Pathway	0.769	0.0762	2.558
G alpha (z) signalling events	0.761	0.104	-1.342
Retinol Biosynthesis	0.761	0.104	-2.236
Collagen degradation	0.759	0.0984	-0.816
MTF1 activates gene expression	0.759	0.333	NaN
Melanin biosynthesis	0.759	0.333	NaN
Proline catabolism	0.759	0.333	NaN
Uracil Degradation II (Reductive)	0.759	0.333	NaN
Guanine and Guanosine Salvage I	0.759	0.333	NaN
S-methyl-5'-thioadenosine Degradation II	0.759	0.333	NaN
Proline Degradation	0.759	0.333	NaN
Thyronamine and Iodothyronamine Metabolism	0.759	0.333	NaN
Thymine Degradation	0.759	0.333	NaN
Biotin-carboxyl Carrier Protein Assembly	0.759	0.333	NaN
Thyroid Hormone Metabolism I (via Deiodination)	0.759	0.333	NaN
Adenine and Adenosine Salvage I	0.759	0.333	NaN
4-aminobutyrate Degradation I	0.759	0.333	NaN
G Beta Gamma Signaling	0.758	0.0853	-0.333
Protein Ubiquitination Pathway	0.75	0.0769	NaN
MIF-mediated Glucocorticoid Regulation	0.744	0.111	1
IL-22 Signaling	0.738	0.125	NaN
RAB GEFs exchange GTP for GDP on RABs	0.734	0.0899	0.707
Aryl Hydrocarbon Receptor Signaling	0.732	0.0818	1.667
Gustation Pathway	0.732	0.0792	1
Sumoylation Pathway	0.73	0.0874	0.378
fMLP Signaling in Neutrophils	0.728	0.084	0.707
Passive transport by Aquaporins	0.721	0.154	NaN
Advanced glycosylation endproduct receptor signaling	0.721	0.154	NaN
Azathioprine ADME	0.721	0.154	NaN
NAD Phosphorylation and Dephosphorylation	0.721	0.154	NaN
Guanosine Nucleotides Degradation III	0.721	0.154	NaN
Glucocorticoid Biosynthesis	0.721	0.154	NaN
Microautophagy Signaling Pathway	0.719	0.0813	0.816
Unfolded protein response	0.716	0.0889	0
GABA Receptor Signaling	0.713	0.0833	NaN
Signaling by FGFR1	0.71	0.1	2.236
Antiproliferative Role of Somatostatin Receptor 2	0.704	0.0909	NaN
Signaling by Erythropoietin	0.702	0.12	NaN
BMP signaling pathway	0.699	0.0879	-0.707
Semaphorin interactions	0.693	0.0938	0.816
NGF Signaling	0.682	0.0833	1.414
Acetylcholine binding and downstream events	0.671	0.143	NaN
LGI-ADAM interactions	0.671	0.143	NaN
Interleukin-15 signaling	0.671	0.143	NaN
Aspirin ADME	0.671	0.143	NaN
Renin-Angiotensin Signaling	0.667	0.0826	1.414
Apoptotic execution phase	0.663	0.0962	0.447
NGF-stimulated transcription	0.659	0.103	1
Inhibition of Matrix Metalloproteases	0.659	0.103	NaN
FcÎ³ Receptor-mediated Phagocytosis in Macrophages and Monocytes	0.648	0.0851	2.828
NR1D1 (REV-ERBA) represses gene expression	0.647	0.25	NaN
Threonine catabolism	0.647	0.25	NaN
Catecholamine Biosynthesis	0.647	0.25	NaN
Taurine Biosynthesis	0.647	0.25	NaN
Pyroptosis	0.635	0.111	NaN
Gluconeogenesis I	0.635	0.111	NaN
Transcriptional Regulation by VENTX	0.633	0.1	0
Signaling by NTRK1 (TRKA)	0.631	0.0864	1.134
Signaling by Activin	0.626	0.133	NaN
YAP1- and WWTR1 (TAZ)-stimulated gene expression	0.626	0.133	NaN
Fatty Acid Activation	0.626	0.133	NaN
CXCR4 Signaling	0.619	0.0774	0.333
TGF-Î² Signaling	0.616	0.0833	1.134
Nicotine Degradation II	0.614	0.0882	-0.816
FLT3 Signaling in Hematopoietic Progenitor Cells	0.614	0.0854	1.633
Androgen Signaling	0.608	0.0769	-1.633
SUMOylation of intracellular receptors	0.605	0.107	NaN
Glutathione Redox Reactions I	0.605	0.107	NaN
The citric acid (TCA) cycle and respiratory electron transport	0.599	0.0909	-0.447
Interleukin-3, Interleukin-5 and GM-CSF signaling	0.599	0.0909	2.236
MHC class II antigen presentation	0.598	0.0794	0.632
Phospholipases	0.596	0.087	-1.342
Granzyme B Signaling	0.585	0.125	NaN
Glutaryl-CoA Degradation	0.585	0.125	NaN
Superpathway of Citrulline Metabolism	0.585	0.125	NaN
Adenosine Nucleotides Degradation II	0.585	0.125	NaN
MyD88:MAL(TIRAP) cascade initiated on plasma membrane	0.585	0.0952	2
Regulation of beta-cell development	0.585	0.0952	0
VEGF Family Ligand-Receptor Interactions	0.581	0.0833	1.134
PEDF Signaling	0.581	0.0833	2.449
EGF Signaling	0.579	0.0893	2.236
Aldosterone Signaling in Epithelial Cells	0.574	0.0756	0
Xenobiotic Metabolism General Signaling Pathway	0.568	0.0769	0.905
LPS-stimulated MAPK Signaling	0.566	0.0824	2.449
Choline catabolism	0.564	0.2	NaN
Intestinal absorption	0.564	0.2	NaN
Arsenate Detoxification I (Glutaredoxin)	0.564	0.2	NaN
Tetrapyrrole Biosynthesis II	0.564	0.2	NaN
CMP-N-acetylneuraminate Biosynthesis I (Eukaryotes)	0.564	0.2	NaN
Lysine Degradation II	0.564	0.2	NaN
Citrulline-Nitric Oxide Cycle	0.564	0.2	NaN
Galactose Degradation I (Leloir Pathway)	0.564	0.2	NaN
Glutamate Degradation III (via 4-aminobutyrate)	0.564	0.2	NaN
Acetate Conversion to Acetyl-CoA	0.564	0.2	NaN
Netrin Signaling	0.563	0.0751	0.832
Vasopressin regulates renal water homeostasis via Aquaporins	0.562	0.093	-1
Interleukin-1 family signaling	0.56	0.0775	2.53
CDK5 Signaling	0.551	0.0783	0
Signaling by CSF3 (G-CSF)	0.549	0.1	NaN
Ephrin B Signaling	0.544	0.0833	-1
Iron uptake and transport	0.541	0.0862	-0.447
PI3K Cascade	0.54	0.0909	2
TBC/RABGAPs	0.54	0.0909	-1
PDGF Signaling	0.535	0.0805	2.646
Regulation of the Epithelial Mesenchymal Transition in Development Pathway	0.535	0.0805	1.633
NRF2-mediated Oxidative Stress Response	0.526	0.0717	-0.632
Sonic Hedgehog Signaling	0.523	0.0968	NaN
Metabolism of water-soluble vitamins and cofactors	0.523	0.0847	0.447
GPER1 signaling	0.52	0.0889	-2
Orexin Signaling Pathway	0.517	0.0714	-0.728
Metabolism of Angiotensinogen to Angiotensins	0.513	0.111	NaN
Metabolism of amine-derived hormones	0.513	0.111	NaN
Unfolded Protein Response (UPR)	0.513	0.111	NaN
GADD45 Signaling	0.505	0.0833	-0.447
PCP (Planar Cell Polarity) Pathway	0.505	0.0833	2
Estrogen Biosynthesis	0.5	0.087	-1
DNA damage-induced 14-3-3Ïƒ Signaling	0.5	0.087	1
Arginine Biosynthesis IV	0.497	0.167	NaN
Pyruvate Fermentation to Lactate	0.497	0.167	NaN
Chondroitin and Dermatan Biosynthesis	0.497	0.167	NaN
Glycine Cleavage Complex	0.497	0.167	NaN
UDP-N-acetyl-D-glucosamine Biosynthesis II	0.497	0.167	NaN
GPCR-Mediated Integration of Enteroendocrine Signaling Exemplified by an L Cell	0.497	0.08	0
Complement cascade	0.489	0.0741	2.53
Semaphorin Signaling in Neurons	0.488	0.082	NaN
Pre-NOTCH Expression and Processing	0.482	0.0789	1.342
GDNF Family Ligand-Receptor Interactions	0.482	0.0789	1.342
Hypoxia Signaling in the Cardiovascular System	0.482	0.0789	NaN
RHO GTPases activate CIT	0.481	0.105	NaN
Î³-linolenate Biosynthesis II (Animals)	0.481	0.105	NaN
Sensory perception of taste	0.48	0.0851	0
nNOS Signaling in Neurons	0.48	0.0851	NaN
Ephrin A Signaling	0.48	0.0851	NaN
MAPK targets/ Nuclear events mediated by MAP kinases	0.476	0.0909	NaN
Cytoprotection by HMOX1	0.472	0.0806	-0.447
IL-2 Signaling	0.472	0.0806	1.342
Reelin Signaling in Neurons	0.457	0.0725	1.414
Dermatan Sulfate Biosynthesis	0.456	0.0794	-0.447
Costimulation by the CD28 family	0.454	0.0769	1.633
IL-7 Signaling Pathway	0.454	0.0769	2.236
Cargo concentration in the ER	0.454	0.0882	NaN
Triglyceride metabolism	0.454	0.0882	NaN
Fatty Acid Î²-oxidation I	0.454	0.0882	NaN
Interleukin-12 family signaling	0.452	0.1	NaN
Androgen Biosynthesis	0.452	0.1	NaN
GABAergic Receptor Signaling Pathway (Enhanced)	0.447	0.0719	-0.632
Pancreatic Secretion Signaling Pathway	0.445	0.0688	2.668
Transcriptional activity of SMAD2/SMAD3:SMAD4 heterotrimer	0.444	0.0816	NaN
Erythrocytes take up oxygen and release carbon dioxide	0.443	0.143	NaN
Aryl hydrocarbon receptor signalling	0.443	0.143	NaN
Atorvastatin ADME	0.443	0.143	NaN
Urea Cycle	0.443	0.143	NaN
Adenine and Adenosine Salvage III	0.443	0.143	NaN
Glycoaminoglycan-protein Linkage Region Biosynthesis	0.443	0.143	NaN
Aspartate Degradation II	0.443	0.143	NaN
Î±-Adrenergic Signaling	0.443	0.0734	NaN
DDX58/IFIH1-mediated induction of interferon-alpha/beta	0.44	0.0759	1.633
IL-3 Signaling	0.44	0.0759	1.633
PIP3 activates AKT signaling	0.437	0.0714	1.897
Oxytocin in Spinal Neurons Signaling Pathway	0.433	0.0857	NaN
Signaling by NOTCH3	0.427	0.08	-1
NR1H2 and NR1H3-mediated signaling	0.427	0.08	0
MYC Mediated Apoptosis Signaling	0.427	0.08	2
ERB2-ERBB3 Signaling	0.426	0.0769	2.236
Interleukin-7 signaling	0.425	0.0952	NaN
Fatty Acid Î±-oxidation	0.425	0.0952	NaN
Endoplasmic Reticulum Stress Pathway	0.425	0.0952	NaN
Transcriptional regulation of granulopoiesis	0.411	0.0784	NaN
UVC-Induced MAPK Signaling	0.411	0.0784	1
Cell Cycle: G2/M DNA Damage Checkpoint Regulation	0.411	0.0784	1
TRAIL signaling	0.398	0.125	NaN
Miro GTPase Cycle	0.398	0.125	NaN
Inositol Pyrophosphates Biosynthesis	0.398	0.125	NaN
Purine Ribonucleosides Degradation to Ribose-1-phosphate	0.398	0.125	NaN
Detoxification of Reactive Oxygen Species	0.395	0.0811	NaN
Signaling by NOTCH4	0.39	0.0723	0.816
VEGF Signaling	0.383	0.0707	1.134
Activation of NMDA receptors and postsynaptic events	0.378	0.0714	0
Glutathione-mediated Detoxification	0.377	0.0789	NaN
Signaling by NODAL	0.376	0.087	NaN
Metabolism of porphyrins	0.376	0.087	NaN
Formation of paraxial mesoderm	0.376	0.087	NaN
Differential Regulation of Cytokine Production in Intestinal Epithelial Cells by IL-17A and IL-17F	0.376	0.087	NaN
Pyrimidine Deoxyribonucleotides De Novo Biosynthesis I	0.376	0.087	NaN
Tryptophan Degradation III (Eukaryotic)	0.376	0.087	NaN
Histidine Degradation VI	0.376	0.087	NaN
Vitamin-C Transport	0.376	0.087	NaN
Inhibition of ARE-Mediated mRNA Degradation Pathway	0.37	0.0675	2.53
RHO GTPases Activate Rhotekin and Rhophilins	0.36	0.111	NaN
Urea cycle	0.36	0.111	NaN
Sucrose Degradation V (Mammalian)	0.36	0.111	NaN
Î±-tocopherol Degradation	0.36	0.111	NaN
Heme Biosynthesis II	0.36	0.111	NaN
GÎ±12/13 Signaling	0.357	0.0677	0
Regulation of RUNX1 Expression and Activity	0.355	0.0833	NaN
Growth hormone receptor signaling	0.355	0.0833	NaN
Fc Epsilon RI Signaling	0.35	0.0678	1.414
GPCR-Mediated Nutrient Sensing in Enteroendocrine Cells	0.35	0.0678	0
CCR3 Signaling in Eosinophils	0.348	0.0672	1
Sphingolipid metabolism	0.345	0.069	0
Cholecystokinin/Gastrin-mediated Signaling	0.341	0.0672	1.414
COPII-mediated vesicle transport	0.336	0.0694	1.342
Incretin synthesis, secretion, and inactivation	0.334	0.08	NaN
Bupropion Degradation	0.334	0.08	NaN
Mitochondrial Dysfunction	0.331	0.064	0
Gamma carboxylation, hypusine formation and arylsulfatase activation	0.328	0.0732	NaN
Activation of gene expression by SREBF (SREBP)	0.328	0.0732	NaN
Signaling by FGFR4	0.328	0.0732	NaN
POU5F1 (OCT4), SOX2, NANOG repress genes related to differentiation	0.326	0.1	NaN
mRNA Editing	0.326	0.1	NaN
RUNX1 and FOXP3 control the development of regulatory T lymphocytes (Tregs)	0.326	0.1	NaN
Embryonic Stem Cell Differentiation into Cardiac Lineages	0.326	0.1	NaN
Citrulline Biosynthesis	0.326	0.1	NaN
CD27 Signaling in Lymphocytes	0.326	0.0702	NaN
CNTF Signaling	0.326	0.0702	2
Signaling by FGFR2	0.325	0.0685	-0.447
DHCR24 Signaling Pathway	0.323	0.0657	-0.333
Germ Cell-Sertoli Cell Junction Signaling	0.316	0.0647	NaN
Fertilization	0.315	0.0769	NaN
Signaling by BMP	0.315	0.0769	NaN
WNT ligand biogenesis and trafficking	0.315	0.0769	NaN
Miscellaneous transport and binding events	0.315	0.0769	NaN
Estrogen-mediated S-phase Entry	0.315	0.0769	NaN
Ubiquinol-10 Biosynthesis (Eukaryotic)	0.315	0.0769	NaN
Cancer Drug Resistance by Drug Efflux	0.314	0.069	NaN
Superpathway of Inositol Phosphate Compounds	0.306	0.0636	0
Signaling by SCF-KIT	0.3	0.0698	NaN
Assembly and cell surface presentation of NMDA receptors	0.3	0.0698	NaN
Effects of PIP2 hydrolysis	0.298	0.0741	NaN
ATF4 activates genes in response to endoplasmic reticulum stress	0.298	0.0741	NaN
NAD Salvage Pathway II	0.298	0.0741	NaN
Glycolysis I	0.298	0.0741	NaN
Signaling by Leptin	0.297	0.0909	NaN
Alpha-protein kinase 1 signaling pathway	0.297	0.0909	NaN
Oleate Biosynthesis II (Animals)	0.297	0.0909	NaN
Purine Nucleotides De Novo Biosynthesis II	0.297	0.0909	NaN
Glycine Betaine Degradation	0.297	0.0909	NaN
Nicotine Degradation III	0.29	0.0667	0
Chondroitin Sulfate Biosynthesis	0.279	0.0656	-1
14-3-3-mediated Signaling	0.276	0.063	1.633
Carboxyterminal post-translational modifications of tubulin	0.274	0.0667	NaN
Signaling by NOTCH1	0.274	0.0641	0.447
Presynaptic depolarization and calcium channel opening	0.272	0.0833	NaN
Tryptophan catabolism	0.272	0.0833	NaN
Hematopoiesis from Multipotent Stem Cells	0.272	0.0833	NaN
UFMylation Signaling Pathway	0.269	0.0645	1
Myogenesis	0.265	0.069	NaN
Binding and Uptake of Ligands by Scavenger Receptors	0.265	0.0625	-1.134
C-type lectin receptors (CLRs)	0.264	0.0621	2.828
Role of RIG1-like Receptors in Antiviral Innate Immunity	0.262	0.0652	NaN
IL-23 Signaling Pathway	0.262	0.0652	NaN
Transcriptional Regulation by MECP2	0.258	0.0635	NaN
Peroxisomal protein import	0.258	0.0635	-1
Thrombopoietin Signaling	0.258	0.0635	2
Hedgehog 'off' state	0.257	0.0619	0.378
Glucose metabolism	0.255	0.0625	-1.342
Salvage Pathways of Pyrimidine Ribonucleotides	0.252	0.0619	-1.633
Nucleotide catabolism	0.251	0.0667	NaN
Mitochondrial calcium ion transport	0.249	0.0769	NaN
Transcriptional regulation of testis differentiation	0.249	0.0769	NaN
Meiotic recombination	0.239	0.0625	NaN
Asparagine N-linked glycosylation	0.237	0.0645	NaN
Regulation of TP53 Activity through Association with Co-factors	0.229	0.0714	NaN
Formation of axial mesoderm	0.229	0.0714	NaN
DNA Double-Strand Break Repair by Homologous Recombination	0.229	0.0714	NaN
DNA Double-Strand Break Repair by Non-Homologous End Joining	0.229	0.0714	NaN
Leukotriene Biosynthesis	0.229	0.0714	NaN
Mevalonate Pathway I	0.229	0.0714	NaN
Colanic Acid Building Blocks Biosynthesis	0.229	0.0714	NaN
Regulation of cholesterol biosynthesis by SREBP (SREBF)	0.21	0.0667	NaN
Mitotic Telophase/Cytokinesis	0.21	0.0667	NaN
Response of EIF2AK1 (HRI) to heme deficiency	0.21	0.0667	NaN
Choline Biosynthesis III	0.21	0.0667	NaN
Rap1 signalling	0.194	0.0625	NaN
FOXO-mediated transcription of cell death genes	0.194	0.0625	NaN
D-myo-inositol (1,4,5)-trisphosphate Degradation	0.194	0.0625	NaN
CSDE1 Signaling Pathway	0	0.0536	NaN
SNARE Signaling Pathway	0	0.0441	-0.816
MicroRNA Biogenesis Signaling Pathway	0	0.0535	0
Chaperone Mediated Autophagy Signaling Pathway	0	0.0378	-0.816
NFKBIE Signaling Pathway	0	0.0156	1.89
p53 Signaling	0	0.051	0
Signaling by Insulin receptor	0	0.0233	NaN
ISG15 antiviral mechanism	0	0.0563	1
Meiotic synapsis	0	0.0545	NaN
Cellular response to hypoxia	0	0.0133	NaN
Signaling by ERBB4	0	0.0508	NaN
Mitochondrial protein import	0	0.0156	NaN
Translocation of SLC2A4 (GLUT4) to the plasma membrane	0	0.0563	1
Antimicrobial peptides	0	0.0588	NaN
PI Metabolism	0	0.0488	2
DAG and IP3 signaling	0	0.0488	NaN
Phase II - Conjugation of compounds	0	0.0448	NaN
Eukaryotic Translation Elongation	0	0.0105	NaN
Gap junction trafficking and regulation	0	0.0588	NaN
Activation of Matrix Metalloproteinases	0	0.0606	NaN
Sulfur amino acid metabolism	0	0.0417	NaN
Macroautophagy	0	0.0154	NaN
Regulation of Apoptosis	0	0.0377	NaN
Signaling by EGFR	0	0.06	NaN
SRP-dependent cotranslational protein targeting to membrane	0	0.0087	NaN
Cholesterol biosynthesis	0	0.04	NaN
Degradation of beta-catenin by the destruction complex	0	0.0326	NaN
Metabolism of steroid hormones	0	0.0571	NaN
trans-Golgi Network Vesicle Budding	0	0.0541	0
TCF dependent signaling in response to WNT	0	0.0452	0.333
TCR signaling	0	0.0556	1.134
Fcgamma receptor (FCGR) dependent phagocytosis	0	0.0318	2
Generic Transcription Pathway	0	0.0304	-0.277
RNA Polymerase II Transcription	0	0.0336	-2.236
Gene Silencing by RNA	0	0.0211	NaN
Signaling by Type 1 Insulin-like Growth Factor 1 Receptor (IGF1R)	0	0.0588	NaN
Selenoamino acid metabolism	0	0.00935	NaN
Fc epsilon receptor (FCERI) signaling	0	0.0485	2.333
Mitotic Metaphase and Anaphase	0	0.0383	-1
Oxidative Stress Induced Senescence	0	0.0349	NaN
Senescence-Associated Secretory Phenotype (SASP)	0	0.0411	NaN
Oncogene Induced Senescence	0	0.0588	NaN
DNA Damage/Telomere Stress Induced Senescence	0	0.0179	NaN
EPH-Ephrin signaling	0	0.0426	1
SUMOylation of DNA damage response and repair proteins	0	0.0132	NaN
HSP90 chaperone cycle for steroid hormone receptors in the presence of ligand	0	0.0545	NaN
Cellular response to heat stress	0	0.0515	1.342
Metabolism of polyamines	0	0.0169	NaN
Netrin-1 signaling	0	0.06	NaN
Nephrin family interactions	0	0.0435	NaN
Signaling by ROBO receptors	0	0.0431	0.447
Energy dependent regulation of mTOR by LKB1-AMPK	0	0.0345	NaN
XBP1(S) activates chaperone genes	0	0.0208	NaN
Transcriptional regulation of white adipocyte differentiation	0	0.0595	-1.342
Olfactory Signaling Pathway	0	0.0405	NaN
ABC-family proteins mediated transport	0	0.0297	NaN
Glyoxylate metabolism and glycine degradation	0	0.0357	NaN
SUMOylation of transcription cofactors	0	0.0227	NaN
Glutamate binding, activation of AMPA receptors and synaptic plasticity	0	0.0312	NaN
Platelet homeostasis	0	0.0581	-0.447
Class C/3 (Metabotropic glutamate/pheromone receptors)	0	0.05	NaN
ERCC6 (CSB) and EHMT2 (G9a) positively regulate rRNA expression	0	0.027	NaN
NoRC negatively regulates rRNA expression	0	0.0263	NaN
MyD88 cascade initiated on plasma membrane	0	0.04	NaN
MAP kinase activation	0	0.0513	NaN
Mitotic G2-G2/M phases	0	0.0553	-1.508
Regulation of mitotic cell cycle	0	0.0227	NaN
Mitotic G1 phase and G1/S transition	0	0.0382	1.342
Hedgehog ligand biogenesis	0	0.0154	NaN
Activation of anterior HOX genes in hindbrain during early embryogenesis	0	0.0247	NaN
Activated PKN1 stimulates transcription of AR regulated genes KLK2 and KLK3	0	0.0357	NaN
RHO GTPases activate IQGAPs	0	0.0323	NaN
TP53 Regulates Metabolic Genes	0	0.0341	NaN
TP53 Regulates Transcription of Cell Death Genes	0	0.0455	NaN
Signaling by FGFR3	0	0.05	NaN
RHO GTPases Activate Formins	0	0.0504	-1.134
TNFR2 non-canonical NF-kB pathway	0	0.0588	2
RHO GTPases Activate NADPH Oxidases	0	0.0455	NaN
NIK-->noncanonical NF-kB signaling	0	0.0167	NaN
MAPK6/MAPK4 signaling	0	0.0435	NaN
Deubiquitination	0	0.0494	-0.277
HDR through Homologous Recombination (HRR) or Single Strand Annealing (SSA)	0	0.0268	NaN
Nonhomologous End-Joining (NHEJ)	0	0.0408	NaN
DNA Double Strand Break Response	0	0.0339	NaN
Fanconi Anemia Pathway	0	0.0263	NaN
Major pathway of rRNA processing in the nucleolus and cytosol	0	0.0108	NaN
TP53 Regulates Transcription of Cell Cycle Genes	0	0.0408	NaN
TP53 Regulates Transcription of DNA Repair Genes	0	0.0571	-1
Regulation of TP53 Activity through Phosphorylation	0	0.0538	-1.342
Regulation of TP53 Activity through Acetylation	0	0.0333	NaN
Keratinization	0	0.028	-1.633
Regulation of TP53 Expression and Degradation	0	0.0513	NaN
PTEN Regulation	0	0.0267	NaN
RNA polymerase II transcribes snRNA genes	0	0.0361	NaN
COPI-mediated anterograde transport	0	0.0098	NaN
Intra-Golgi and retrograde Golgi-to-ER traffic	0	0.0591	-1.155
Mitotic Prophase	0	0.0194	NaN
Mitotic Prometaphase	0	0.0542	-2.111
Activation of the pre-replicative complex	0	0.0303	NaN
DNA Replication Pre-Initiation	0	0.0288	NaN
Synthesis of DNA	0	0.0336	-1
S Phase	0	0.03	NaN
Cell Cycle Checkpoints	0	0.0441	-1.732
mRNA Capping	0	0.0345	NaN
Processing of Capped Intron-Containing Pre-mRNA	0	0.0174	-2.236
Eukaryotic Translation Initiation	0	0.0164	NaN
Eukaryotic Translation Termination	0	0.0106	NaN
RNA Polymerase I Transcription	0	0.02	NaN
DNA Damage Bypass	0	0.0417	NaN
RNA Polymerase III Transcription	0	0.0488	NaN
Processing of Capped Intronless Pre-mRNA	0	0.0345	NaN
Mitochondrial Fatty Acid Beta-Oxidation	0	0.0417	NaN
Nucleosome assembly	0	0.0408	NaN
Signaling by PTK6	0	0.0364	NaN
Synaptic adhesion-like molecules	0	0.0476	NaN
RET signaling	0	0.0488	NaN
Cargo recognition for clathrin-mediated endocytosis	0	0.0561	0
Clathrin-mediated endocytosis	0	0.0615	0
Transcriptional regulation by the AP-2 (TFAP2) family of transcription factors	0	0.0556	NaN
E3 ubiquitin ligases ubiquitinate target proteins	0	0.0364	NaN
RAB geranylgeranylation	0	0.0615	1
Transcriptional regulation by RUNX1	0	0.0263	0
Digestion	0	0.0476	NaN
RUNX1 regulates megakaryocyte differentiation and platelet function	0	0.0517	NaN
Regulation of RUNX2 expression and activity	0	0.0274	NaN
Cristae formation	0	0.0323	NaN
Gene and protein expression by JAK-STAT signaling after IL-12 stimulation	0	0.0541	NaN
Neddylation	0	0.0203	-1.342
Transcriptional Regulation by E2F6	0	0.0294	NaN
Nucleotide salvage	0	0.0476	NaN
Endosomal Sorting Complex Required For Transport (ESCRT)	0	0.0323	NaN
Nonsense-Mediated Decay (NMD)	0	0.00855	NaN
FLT3 Signaling	0	0.0278	NaN
EGR2 and SOX10-mediated initiation of Schwann cell myelination	0	0.0345	NaN
Response of EIF2AK4 (GCN2) to amino acid deficiency	0	0.0194	NaN
Amino acids regulate mTORC1	0	0.0364	NaN
Aggrephagy	0	0.0465	NaN
RAS processing	0	0.0417	NaN
KEAP1-NFE2L2 pathway	0	0.044	0
Amyloid fiber formation	0	0.0411	NaN
GABA receptor activation	0	0.05	NaN
Class I MHC mediated antigen processing and presentation	0	0.0613	1.877
Factors involved in megakaryocyte development and platelet production	0	0.044	-1
Signaling by the B Cell Receptor (BCR)	0	0.0471	2.646
Ion channel transport	0	0.0546	0.333
Protein Sorting Signaling Pathway	0	0.0562	0.632
VDR/RXR Activation	0	0.0385	NaN
Folate Signaling Pathway	0	0.0536	NaN
Sleep NREM Signaling Pathway	0	0.0609	-0.378
PXR/RXR Activation	0	0.0615	0
Role of BRCA1 in DNA Damage Response	0	0.0375	NaN
Activation of IRF by Cytosolic Pattern Recognition Receptors	0	0.0615	1
Role of NFAT in Regulation of the Immune Response	0	0.0251	1.964
FcÎ³RIIB Signaling in B Lymphocytes	0	0.0188	2
CCR5 Signaling in Macrophages	0	0.0301	1
Calcium-induced T Lymphocyte Apoptosis	0	0.0152	0.816
Cytotoxic T Lymphocyte-mediated Apoptosis of Target Cells	0	0.0188	NaN
Lymphotoxin Î² Receptor Signaling	0	0.0545	NaN
CTLA4 Signaling in Cytotoxic T Lymphocytes	0	0.0493	-2.414
T Helper Cell Differentiation	0	0.0255	NaN
CD28 Signaling in T Helper Cells	0	0.0271	1.265
IL-15 Signaling	0	0.0114	1.633
Role of Cytokines in Mediating Communication between Immune Cells	0	0.0185	NaN
Dendritic Cell Maturation	0	0.057	3.182
Mechanisms of Viral Exit from Host Cells	0	0.0488	NaN
Melatonin Signaling	0	0.0278	NaN
Angiopoietin Signaling	0	0.0395	NaN
Agrin Interactions at Neuromuscular Junction	0	0.029	NaN
ICOS-ICOSL Signaling in T Helper Cells	0	0.0256	0.707
Lipid Antigen Presentation by CD1	0	0.00482	NaN
Cell Cycle Regulation by BTG Family Proteins	0	0.0526	NaN
Mitotic Roles of Polo-Like Kinase	0	0.0597	NaN
Role of CHK Proteins in Cell Cycle Checkpoint Control	0	0.0517	NaN
RAN Signaling	0	0.0588	NaN
Melanocyte Development and Pigmentation Signaling	0	0.0612	1.342
DNA Methylation and Transcriptional Repression Signaling	0	0.0408	NaN
ATM Signaling	0	0.06	0.447
Growth Hormone Signaling	0	0.0563	NaN
Prolactin Signaling	0	0.0526	2
Type I Diabetes Mellitus Signaling	0	0.0275	3
p70S6K Signaling	0	0.0121	1.134
mTOR Signaling	0	0.0514	1.633
G Protein Signaling Mediated by Tubby	0	0.0235	0.333
Communication between Innate and Adaptive Immune Cells	0	0.0193	NaN
CDC42 Signaling	0	0.0503	0.333
EIF2 Signaling	0	0.0304	1.342
RHOA Signaling	0	0.0403	-1
Phospholipase C Signaling	0	0.0357	1
B Cell Development	0	0.0082	NaN
Regulation of IL-2 Expression in Activated and Anergic T Lymphocytes	0	0.0216	1.265
Granzyme A Signaling	0	0.0135	NaN
NUR77 Signaling in T Lymphocytes	0	0.0292	0
PKCÎ¸ Signaling in T Lymphocytes	0	0.0341	2.673
Antiproliferative Role of TOB in T Cell Signaling	0	0.00704	NaN
OX40 Signaling Pathway	0	0.0272	NaN
PI3K Signaling in B Lymphocytes	0	0.0306	2
Cyclins and Cell Cycle Regulation	0	0.0465	NaN
Cell Cycle Control of Chromosomal Replication	0	0.0179	NaN
Assembly of RNA Polymerase II Complex	0	0.02	NaN
Differential Regulation of Cytokine Production in Macrophages and T Helper Cells by IL-17A and IL-17F	0	0.0556	NaN
Role of JAK1, JAK2 and TYK2 in Interferon Signaling	0	0.0385	NaN
Telomerase Signaling	0	0.0556	2.449
Hematopoiesis from Pluripotent Stem Cells	0	0.00671	NaN
ERBB Signaling	0	0.0538	2.236
ERBB4 Signaling	0	0.0294	NaN
Heparan Sulfate Biosynthesis	0	0.0444	NaN
Thyroid Hormone Metabolism II (via Conjugation and/or Degradation)	0	0.0238	NaN
Heparan Sulfate Biosynthesis (Late Stages)	0	0.0361	NaN
Pyrimidine Ribonucleotides De Novo Biosynthesis	0	0.0465	NaN
Isoleucine Degradation I	0	0.0588	NaN
D-myo-inositol-5-phosphate Metabolism	0	0.0556	-0.378
Melatonin Degradation I	0	0.0312	NaN
Pyridoxal 5'-phosphate Salvage Pathway	0	0.0308	NaN
Triacylglycerol Degradation	0	0.0517	NaN
D-myo-inositol (1,4,5)-Trisphosphate Biosynthesis	0	0.0385	NaN
Dermatan Sulfate Biosynthesis (Late Stages)	0	0.06	NaN
Dermatan Sulfate Degradation (Metazoa)	0	0.0588	NaN
D-myo-inositol (1,4,5,6)-Tetrakisphosphate Biosynthesis	0	0.0549	0
D-myo-inositol (3,4,5,6)-tetrakisphosphate Biosynthesis	0	0.0549	0
TCA Cycle II (Eukaryotic)	0	0.0435	NaN
3-phosphoinositide Degradation	0	0.0518	0.378
3-phosphoinositide Biosynthesis	0	0.0529	0.378
Pyrimidine Ribonucleotides Interconversion	0	0.05	NaN
Chondroitin Sulfate Biosynthesis (Late Stages)	0	0.0566	NaN
Superpathway of Melatonin Degradation	0	0.029	NaN
Oxidative Ethanol Degradation III	0	0.0357	NaN
Ethanol Degradation IV	0	0.04	NaN
Ethanol Degradation II	0	0.0286	NaN
Superpathway of Geranylgeranyldiphosphate Biosynthesis I (via Mevalonate)	0	0.0556	NaN
Superpathway of Cholesterol Biosynthesis	0	0.0345	NaN
Epithelial Adherens Junction Signaling	0	0.057	0
Remodeling of Epithelial Adherens Junctions	0	0.0294	NaN
Role of p14/p19ARF in Tumor Suppression	0	0.0333	NaN
TEC Kinase Signaling	0	0.0554	2.065
UVB-Induced MAPK Signaling	0	0.0577	NaN
Oxidative Phosphorylation	0	0.00893	NaN
HIPPO signaling	0	0.0575	NaN
Cell Cycle: G1/S Checkpoint Regulation	0	0.058	NaN
SAPK/JNK Signaling	0	0.0179	0.707
JAK/STAT Signaling	0	0.061	2.236
Xenobiotic Metabolism Signaling	0	0.0612	NaN
IL-4 Signaling	0	0.0381	1.706
B Cell Receptor Signaling	0	0.0284	2
Insulin Receptor Signaling	0	0.0429	0.816
IGF-1 Signaling	0	0.0476	2
Dopamine Receptor Signaling	0	0.0375	NaN
NF-ÎºB Signaling	0	0.0438	3.8
T Cell Receptor Signaling	0	0.0503	2.043
Sirtuin Signaling Pathway	0	0.0515	-1.732
Th17 Activation Pathway	0	0.0186	2.333
NER (Nucleotide Excision Repair, Enhanced Pathway)	0	0.011	NaN
Apelin Pancreas Signaling Pathway	0	0.0435	NaN
FAT10 Signaling Pathway	0	0.0175	NaN
T Cell Exhaustion Signaling Pathway	0	0.0406	2.668
Xenobiotic Metabolism AHR Signaling Pathway	0	0.046	2
Xenobiotic Metabolism CAR Signaling Pathway	0	0.0515	-0.632
Xenobiotic Metabolism PXR Signaling Pathway	0	0.0359	0.378
Kinetochore Metaphase Signaling Pathway	0	0.0545	1

## Sheet: p21vsp60iRCS
ID	Entrez Gene Name	Symbol	Expr Log Ratio	Expr p-value	Cell Assignment
ENSRNOG00000000001	arylsulfatase family member J	ARSJ	4.388	0.003
ENSRNOG00000000007	glutamate decarboxylase 1	GAD1	0.669	1.83e-19	Amacrine
ENSRNOG00000000009	transmembrane and coiled-coil domains 5B	Tmco5b	-1.946	0.0501
ENSRNOG00000000010	cerebellin 1 precursor	CBLN1	0.791	2.88e-05	Amacrine
ENSRNOG00000000017	STEAP family member 1	STEAP1	0.188	0.913	Muller
ENSRNOG00000000021	F-box and leucine-rich repeat protein 14, pseudogene 1	Fbxl14-ps1	-0.11	0.503
ENSRNOG00000000024	heme binding protein 1	HEBP1	1.084	0.00553	Microglia
ENSRNOG00000000033	transmembrane and coiled-coil domain family 2	TMCC2	0.082	0.394	RGCs
ENSRNOG00000000034	NUAK family kinase 2	NUAK2	0.785	0.0355
ENSRNOG00000000036	kelch domain containing 8A	KLHDC8A	0.547	8.99e-07	Bipolar
ENSRNOG00000000040	KIAA1614	KIAA1614	0.009	0.912
ENSRNOG00000000041	solute carrier family 26 member 1	SLC26A1	0.69	0.000799
ENSRNOG00000000042	xenotropic and polytropic retrovirus receptor 1	XPR1	-0.012	0.924
ENSRNOG00000000043	alpha-L-iduronidase	IDUA	0.36	5.25e-05	Microglia
ENSRNOG00000000044	transmembrane protein 175	TMEM175	-0.05	0.64
ENSRNOG00000000047	CD82 molecule	CD82	0.947	3.18e-11	Muller
ENSRNOG00000000048	cyclin G associated kinase	GAK	0.008	0.937
ENSRNOG00000000053	C-reactive protein	CRP	0.92	0.213
ENSRNOG00000000054	abhydrolase domain containing 8	ABHD8	0.171	0.0664
ENSRNOG00000000060			0.564	7.76e-14
ENSRNOG00000000062	polycomb group ring finger 3	PCGF3	-0.027	0.87
ENSRNOG00000000064	ATP synthase membrane subunit e	Atp5me	-0.328	0.00214
ENSRNOG00000000065	phosphodiesterase 6B	PDE6B	-2.619	7.09e-252	Rods
ENSRNOG00000000066	F-box protein 28	FBXO28	0.07	0.561	Amacrine
ENSRNOG00000000068	protein phosphatase 2 regulatory subunit B'alpha	PPP2R5A	0.016	0.9
ENSRNOG00000000073	transmembrane p24 trafficking protein 5	TMED5	0.236	0.206	Microglia
ENSRNOG00000000075	metal response element binding transcription factor 2	MTF2	-0.406	0.000115
ENSRNOG00000000081	ANTXR cell adhesion molecule 2	ANTXR2	0.932	0.00183	Vascular
ENSRNOG00000000082	helicase like transcription factor	HLTF	0.338	0.0137	Bipolar
ENSRNOG00000000095	G protein-coupled receptor 89A	GPR89A/GPR89B	-0.159	0.167
ENSRNOG00000000096	PDZ domain containing 1	PDZK1	-0.076	0.567
ENSRNOG00000000097	CD160 molecule	CD160	-0.784	0.249
ENSRNOG00000000098	ring finger protein 115	RNF115	-0.02	0.849
ENSRNOG00000000104	THO complex subunit 3	THOC3	-0.21	0.133	Bipolar
ENSRNOG00000000105	complexin 2	CPLX2	0.478	5.21e-12
ENSRNOG00000000108	aspartylglucosaminidase	AGA	0.156	0.211	Muller
ENSRNOG00000000111	coordinator of PRMT5 and differentiation stimulator	COPRS	0.669	0.000177	Muller
ENSRNOG00000000112	chromosome alignment maintaining phosphoprotein 1	CHAMP1	-0.197	0.0512	Bipolar
ENSRNOG00000000113	elaC ribonuclease Z 1	ELAC1	-0.274	0.0246	Muller
ENSRNOG00000000121	phosphatidylinositol glycan anchor biosynthesis class V	PIGV	-0.282	0.0232	Muller
ENSRNOG00000000122	adenylate kinase 2	AK2	-0.118	0.418
ENSRNOG00000000123	ring finger protein 19B	Rnf19b	0.842	1.13e-12	Microglia
ENSRNOG00000000127	karyopherin subunit alpha 6	KPNA6	-0.413	5.46e-09
ENSRNOG00000000129	PHD finger protein 24	PHF24	0.756	5.04e-14	Muller
ENSRNOG00000000130	DnaJ heat shock protein family (Hsp40) member B5	DNAJB5	0.409	0.000323
ENSRNOG00000000133	thioredoxin domain containing 15	TXNDC15	0.164	0.114
ENSRNOG00000000137	lymphocyte antigen 86	LY86	2.771	2.31e-06	Microglia
ENSRNOG00000000138	GLIS family zinc finger 1	GLIS1	1.429	1.68e-07	Bipolar
ENSRNOG00000000142	plexin domain containing 2	PLXDC2	0.446	0.315
ENSRNOG00000000145	phosphoinositide-3-kinase regulatory subunit 3	PIK3R3	0.332	5.08e-05
ENSRNOG00000000150	DnaJ heat shock protein family (Hsp40) member C1	DNAJC1	-0.33	0.0616	Rods
ENSRNOG00000000151	low density lipoprotein receptor adaptor protein 1	LDLRAP1	-0.015	0.971
ENSRNOG00000000155	component of oligomeric golgi complex 3	COG3	-0.233	0.0052
ENSRNOG00000000156	multiple EGF like domains 6	MEGF6	-0.588	0.513	Muller
ENSRNOG00000000157	autophagy related 12	ATG12	-0.157	0.0417	Microglia
ENSRNOG00000000158	cysteine dioxygenase type 1	CDO1	0.38	0.0441
ENSRNOG00000000161	CHM Rab escort protein	CHM	-0.282	0.0135
ENSRNOG00000000164	lysosomal associated membrane protein 2	LAMP2	0.269	0.0919
ENSRNOG00000000165	6-phosphofructo-2-kinase/fructose-2,6-biphosphatase 1	PFKFB1	-0.45	0.627
ENSRNOG00000000166	apurinic/apyrimidinic endodeoxyribonuclease 2	APEX2	-0.449	0.0234	Muller
ENSRNOG00000000167	5'-aminolevulinate synthase 2	ALAS2	-0.175	0.769	RBCs
ENSRNOG00000000168	glycine amidinotransferase	GATM	0.48	0.00117
ENSRNOG00000000169	AFG2 AAA ATPase homolog B	AFG2B	-0.293	0.0971	Microglia
ENSRNOG00000000170	solute carrier family 30 member 4	SLC30A4	-0.151	0.118
ENSRNOG00000000172	sulfide quinone oxidoreductase	SQOR	-0.556	0.12	Microglia
ENSRNOG00000000175	MIER family member 2	MIER2	-0.86	3.5e-19	Vascular
ENSRNOG00000000177	phospholipid phosphatase 2	PLPP2	-2.493	1.26e-83	Rods
ENSRNOG00000000184	transmembrane serine protease 6	TMPRSS6	0.363	0.167
ENSRNOG00000000185	mercaptopyruvate sulfurtransferase	MPST	0.477	0.0171
ENSRNOG00000000186	thiosulfate sulfurtransferase	TST	0.384	0.206	Muller
ENSRNOG00000000187	colony stimulating factor 2 receptor subunit beta	CSF2RB	2.983	1.51e-08	Microglia
ENSRNOG00000000190	E1A binding protein p300	EP300	-0.535	7.87e-12	Bipolar
ENSRNOG00000000204	synaptotagmin binding, cytoplasmic RNA interacting protein	Syncrip	-0.351	4.56e-05
ENSRNOG00000000219	anoctamin 10	ANO10	0.484	0.000597
ENSRNOG00000000221	abhydrolase domain containing 5, lysophosphatidic acid acyltransferase	ABHD5	-0.446	0.000964	Vascular
ENSRNOG00000000230	lipase maturation factor 1	LMF1	0.034	0.831
ENSRNOG00000000231	potassium channel tetramerization domain containing 17	KCTD17	0.527	4.73e-08	RGCs
ENSRNOG00000000233	glutamate metabotropic receptor 6	GRM6	0.568	3.47e-21	Bipolar
ENSRNOG00000000236	zinc finger protein 207	ZNF207	-0.395	1.55e-05
ENSRNOG00000000237	chromosome 17 open reading frame 75	C17orf75	0.071	0.6	Bipolar
ENSRNOG00000000244	coilin	COIL	-0.012	0.953	Bipolar
ENSRNOG00000000245	solute carrier family 16 member 6	SLC16A6	-1.443	6.94e-53	Rods
ENSRNOG00000000246	archaelysin family metallopeptidase 2	AMZ2	-0.127	0.0787	Muller
ENSRNOG00000000247	major facilitator superfamily domain containing 11	MFSD11	0.509	9.71e-08
ENSRNOG00000000248	serine and arginine rich splicing factor 2	SRSF2	-0.348	0.000408
ENSRNOG00000000249	methyltransferase 23, arginine	METTL23	-0.582	0.00297	Microglia
ENSRNOG00000000250	jumonji domain containing 6, arginine demethylase and lysine hydroxylase	JMJD6	-0.524	1.28e-06	Microglia
ENSRNOG00000000251	ST6 N-acetylgalactosaminide alpha-2,6-sialyltransferase 1	ST6GALNAC1	-0.399	0.702
ENSRNOG00000000257	sphingomyelin phosphodiesterase 3	SMPD3	0.077	0.582
ENSRNOG00000000258	protein arginine methyltransferase 7	PRMT7	-0.096	0.421
ENSRNOG00000000262	zinc finger protein 821	Zfp821	-0.19	0.0469	Amacrine
ENSRNOG00000000264	differentially expressed in FDCP 8 homolog	DEF8	-0.539	2.23e-09	RGCs
ENSRNOG00000000274	phytanoyl-CoA 2-hydroxylase interacting protein like	PHYHIPL	0.314	0.00648
ENSRNOG00000000275	family with sequence similarity 13 member C	FAM13C	0.547	6.22e-08	Amacrine
ENSRNOG00000000277	tet methylcytosine dioxygenase 1	TET1	-1.031	5.39e-16	Muller
ENSRNOG00000000279	reticulon 4 interacting protein 1	RTN4IP1	0.724	0.138	Bipolar
ENSRNOG00000000281	proline dehydrogenase 1	PRODH	0.272	0.356
ENSRNOG00000000283	ess-2 splicing factor homolog	ESS2	-0.203	0.118
ENSRNOG00000000288	scavenger receptor class F member 2	SCARF2	0.671	0.0267
ENSRNOG00000000299	forkhead box O3	FOXO3	-0.494	2.71e-06	Muller
ENSRNOG00000000302	sestrin 1	SESN1	-0.123	0.126
ENSRNOG00000000303	centrosomal protein 57 like 1	CEP57L1	-0.487	0.000189	Muller
ENSRNOG00000000304	CD164 molecule	CD164	0.413	0.0566
ENSRNOG00000000306	sphingomyelin phosphodiesterase 2	SMPD2	-0.806	1.59e-06	Rods
ENSRNOG00000000307	microtubule associated monooxygenase, calponin and LIM domain containing 1	MICAL1	0.956	0.00482	Vascular
ENSRNOG00000000308	zinc finger and BTB domain containing 24	ZBTB24	-0.142	0.325	Rods
ENSRNOG00000000312	FIG4 phosphoinositide 5-phosphatase	FIG4	-0.524	0.000842	Bipolar
ENSRNOG00000000314	SEC63 homolog, protein translocation regulator	SEC63	-0.068	0.264
ENSRNOG00000000316	sine oculis binding protein homolog	SOBP	0.513	0.00382
ENSRNOG00000000321	CD24a antigen	Cd24a	-2.456	0.0953
ENSRNOG00000000322	autophagy related 5	Atg5	-0.185	0.164
ENSRNOG00000000323	PR/SET domain 1	PRDM1	-2.429	3.82e-125
ENSRNOG00000000327	HECT domain and ankyrin repeat containing E3 ubiquitin protein ligase 1	HACE1	-0.245	0.00309	Bipolar
ENSRNOG00000000340	RNA transcription, translation and transport factor	RTRAF	-0.24	0.00562
ENSRNOG00000000341	nidogen 2	NID2	-0.525	0.585	Vascular
ENSRNOG00000000368	glutamate ionotropic receptor kainate type subunit 2	GRIK2	0.093	0.581
ENSRNOG00000000383	myopalladin	MYPN	0.781	0.000155	Bipolar
ENSRNOG00000000386	phenazine biosynthesis like protein domain containing	PBLD	-0.772	0.341
ENSRNOG00000000387			-0.519	7.2e-08
ENSRNOG00000000390			0.065	0.919
ENSRNOG00000000392	Suv3 like RNA helicase	SUPV3L1	-0.533	7.71e-10	Bipolar
ENSRNOG00000000394	serglycin	Srgn	0.796	0.000152
ENSRNOG00000000395	kinesin family binding protein	KIFBP	-0.035	0.665
ENSRNOG00000000396	DExD-box helicase 50	DDX50	-0.298	0.00195
ENSRNOG00000000397	cell division cycle and apoptosis regulator 1	CCAR1	-0.315	9.26e-05
ENSRNOG00000000398	zinc finger containing ubiquitin peptidase 1	ZUP1	-0.716	6.25e-08
ENSRNOG00000000407	discoidin, CUB and LCCL domain containing 1	DCBLD1	0.388	0.0928	Amacrine
ENSRNOG00000000408	golgi associated PDZ and coiled-coil motif containing	Gopc	-0.087	0.339
ENSRNOG00000000411	NUS1 dehydrodolichyl diphosphate synthase subunit	NUS1	0.154	0.1
ENSRNOG00000000412	solute carrier family 35 member F1	SLC35F1	0.666	1.42e-15
ENSRNOG00000000414	centrosomal protein 85 like	CEP85L	-0.344	0.0622
ENSRNOG00000000415	anti-silencing function 1A histone chaperone	ASF1A	-0.304	0.0204	Bipolar
ENSRNOG00000000417	nuclear mitotic apparatus protein 1	NUMA1	-0.015	0.866	Bipolar
ENSRNOG00000000418			0.014	0.941
ENSRNOG00000000419			0.539	0.427
ENSRNOG00000000420	negative elongation factor complex member E	Nelfe	0.186	0.134	Muller
ENSRNOG00000000421	SKI2 subunit of superkiller complex	SKIC2	-0.08	0.43	Horizontal
ENSRNOG00000000422	decapping exoribonuclease	DXO	-0.156	0.378	Vascular
ENSRNOG00000000423			0.006	0.989
ENSRNOG00000000431	activating transcription factor 6 beta	ATF6B	-0.028	0.826
ENSRNOG00000000432	FKBP prolyl isomerase like	FKBPL	-0.525	0.000501	Muller
ENSRNOG00000000433	proline-rich transmembrane protein 1	Prrt1	0.595	7.7e-07	Bipolar
ENSRNOG00000000435	palmitoyl-protein thioesterase 2	PPT2	-0.091	0.354	Bipolar
ENSRNOG00000000436	EGF like domain multiple 8	EGFL8	-0.001	0.997	Vascular
ENSRNOG00000000437	1-acylglycerol-3-phosphate O-acyltransferase 1	AGPAT1	0.351	2.74e-05
ENSRNOG00000000438	ring finger protein 5	RNF5	-0.105	0.387	Muller
ENSRNOG00000000439	advanced glycosylation end-product specific receptor	AGER	0.828	0.0342
ENSRNOG00000000440	PBX homeobox 2	PBX2	0.443	5.51e-08	Muller
ENSRNOG00000000441	G protein signaling modulator 3	GPSM3	0.996	0.000133	Microglia
ENSRNOG00000000442	notch receptor 4	NOTCH4	0.28	0.109	Vascular
ENSRNOG00000000443			1.307	9.83e-08
ENSRNOG00000000451	major histocompatibility complex, class II, DQ alpha 1	HLA-DQA1	3.63	3.13e-06	Microglia
ENSRNOG00000000454	major histocompatibility complex, class II, DO beta	HLA-DOB	2.613	0.00464
ENSRNOG00000000455	transporter 2, ATP binding cassette subfamily B member	TAP2	2.437	0.0604
ENSRNOG00000000456	proteasome 20S subunit beta 8	PSMB8	2.471	1.72e-14
ENSRNOG00000000457	transporter 1, ATP binding cassette subfamily B member	TAP1	2.013	2.1e-07
ENSRNOG00000000459	proteasome 20S subunit beta 9	PSMB9	2.763	1.09e-09
ENSRNOG00000000461	bromodomain containing 2	BRD2	1.116	0.0851
ENSRNOG00000000463	collagen type XI alpha 2 chain	COL11A2	-0.413	0.0819	Muller
ENSRNOG00000000464	retinoid X receptor beta	RXRB	0.074	0.571
ENSRNOG00000000465	solute carrier family 39 member 7	SLC39A7	0.03	0.765	Microglia
ENSRNOG00000000466	hydroxysteroid 17-beta dehydrogenase 8	HSD17B8	0.055	0.676	Muller
ENSRNOG00000000467	ring finger protein 1	RING1	0.032	0.789	Bipolar
ENSRNOG00000000470	VPS52 subunit of GARP complex	VPS52	-0.265	0.0014	Bipolar
ENSRNOG00000000471	beta-1,3-galactosyltransferase 4	B3GALT4	-0.682	0.000915
ENSRNOG00000000473	prefoldin subunit 6	PFDN6	0.154	0.106	Muller
ENSRNOG00000000474	ral guanine nucleotide dissociation stimulator like 2	RGL2	-0.119	0.252
ENSRNOG00000000476	zinc finger and BTB domain containing 22	ZBTB22	-0.585	4.83e-10
ENSRNOG00000000477	death domain associated protein	DAXX	-0.722	9.3e-13	Rods
ENSRNOG00000000478	AA926063gene	AA926063	-1.75	4.85e-31
ENSRNOG00000000479	kinesin family member C1	KIFC1	-0.393	0.212
ENSRNOG00000000480	PHD finger protein 1	PHF1	0.236	0.00919
ENSRNOG00000000481	cutA divalent cation tolerance homolog	CUTA	0.231	0.0165
ENSRNOG00000000483	synaptic Ras GTPase activating protein 1	SYNGAP1	0.335	0.00178
ENSRNOG00000000485	BCL2 antagonist/killer 1	BAK1	-0.021	0.908
ENSRNOG00000000486	gametogenetin binding protein 1	Ggnbp1	0.377	0.42
ENSRNOG00000000487	glutamate metabotropic receptor 4	GRM4	0.303	0.0642
ENSRNOG00000000488	high mobility group AT-hook 1	HMGA1	-0.192	0.174
ENSRNOG00000000490	ribosomal protein S10	RPS10	0.064	0.653
ENSRNOG00000000493	U1 small nuclear ribonucleoprotein C	Snrpc	-0.091	0.525	Amacrine
ENSRNOG00000000495	bridge-like lipid transfer protein family member 3A	BLTP3A	-0.531	1.39e-07
ENSRNOG00000000498	ankyrin repeat and sterile alpha motif domain containing 1A	ANKS1A	-0.525	6.45e-16
ENSRNOG00000000500	signal peptide, CUB domain and EGF like domain containing 3	SCUBE3	-1.565	4.06e-20	Horizontal
ENSRNOG00000000501	zinc finger protein 76	ZNF76	-0.231	0.014	Bipolar
ENSRNOG00000000502	DEF6 guanine nucleotide exchange factor	DEF6	0.865	0.0381	Microglia
ENSRNOG00000000503	peroxisome proliferator activated receptor delta	PPARD	-0.351	0.000376	Microglia
ENSRNOG00000000504	FA complementation group E	FANCE	-0.413	4.64e-05
ENSRNOG00000000506	TEA domain transcription factor 3	TEAD3	-0.174	0.148	Rods
ENSRNOG00000000507	TUB like protein 1	TULP1	-2.054	7.26e-144	Rods
ENSRNOG00000000511	SRSF protein kinase 1	SRPK1	-0.123	0.19
ENSRNOG00000000512	solute carrier family 26 member 8	SLC26A8	0.146	0.555	Amacrine
ENSRNOG00000000513	mitogen-activated protein kinase 14	MAPK14	-0.193	0.0153	Bipolar
ENSRNOG00000000515	mitogen-activated protein kinase 13	MAPK13	0.878	0.155	Microglia
ENSRNOG00000000517	potassium channel tetramerization domain containing 20	KCTD20	0.067	0.599
ENSRNOG00000000519	serine/threonine kinase 38	Stk38	0.245	0.00457
ENSRNOG00000000520	serine and arginine rich splicing factor 3	SRSF3	-0.02	0.843
ENSRNOG00000000521	cyclin dependent kinase inhibitor 1A	CDKN1A	0.636	2.36e-05
ENSRNOG00000000522	copine 5	CPNE5	0.799	1.97e-17
ENSRNOG00000000523	peptidylprolyl isomerase like 1	PPIL1	0.189	0.156	Bipolar
ENSRNOG00000000524	chromosome 6 open reading frame 89	C6orf89	-0.054	0.601
ENSRNOG00000000525	peptidase inhibitor 16	PI16	0.832	0.0133
ENSRNOG00000000527	mitochondrial carrier 1	MTCH1	0.257	0.0301
ENSRNOG00000000528	FYVE, RhoGEF and PH domain containing 2	FGD2	1.633	1.34e-07	Microglia
ENSRNOG00000000529	Pim-1 proto-oncogene, serine/threonine kinase	PIM1	1.213	0.000277
ENSRNOG00000000531			-0.346	0.0572
ENSRNOG00000000532	cap methyltransferase 1	CMTR1	-0.007	0.944
ENSRNOG00000000536	MAM domain containing glycosylphosphatidylinositol anchor 1	MDGA1	1.152	1.21e-13
ENSRNOG00000000540	BTB domain containing 9	BTBD9	0.033	0.814
ENSRNOG00000000541	glyoxalase I	GLO1	0.104	0.182
ENSRNOG00000000542	dynein axonemal heavy chain 8	DNAH8	0.128	0.605
ENSRNOG00000000543	fyn related Src family tyrosine kinase	FRK	-0.011	0.994	Horizontal
ENSRNOG00000000546	5'-nucleotidase domain containing 1	NT5DC1	-0.404	0.00158
ENSRNOG00000000547	TSPY like 4	TSPYL4	0.383	1.44e-10	Horizontal
ENSRNOG00000000549			0.089	0.239
ENSRNOG00000000551	family with sequence similarity 241 member B	FAM241B	-0.401	0.00283	Amacrine
ENSRNOG00000000552	collagen type XIII alpha 1 chain	COL13A1	0.362	0.15	Vascular
ENSRNOG00000000557	secretion associated Ras related GTPase 1A	SAR1A	-0.043	0.53
ENSRNOG00000000559	neuropeptide FF receptor 1	NPFFR1	0.557	0.531	Muller
ENSRNOG00000000560	leucine rich repeat containing 20	LRRC20	0.686	0.00561
ENSRNOG00000000561	phosphatase domain containing paladin 1	PALD1	0.577	0.0448	Microglia
ENSRNOG00000000563	ADAM metallopeptidase with thrombospondin type 1 motif 14	ADAMTS14	0.747	0.375
ENSRNOG00000000564	thymus, brain and testes associated	TBATA	-1.467	5.34e-25
ENSRNOG00000000565	sphingosine-1-phosphate lyase 1	SGPL1	-0.489	2.46e-10
ENSRNOG00000000566	pterin-4 alpha-carbinolamine dehydratase 1	PCBD1	-0.507	0.027	Muller
ENSRNOG00000000567	unc-5 netrin receptor B	UNC5B	0.593	3.17e-06
ENSRNOG00000000568	solute carrier family 29 member 3	SLC29A3	1.215	1.62e-09	Microglia
ENSRNOG00000000569	V-set immunoregulatory receptor	VSIR	1.41	1.98e-13
ENSRNOG00000000571	prosaposin	PSAP	0.649	1.68e-23
ENSRNOG00000000572	carbohydrate sulfotransferase 3	CHST3	0.621	0.00832	Muller
ENSRNOG00000000574			0.726	0.419
ENSRNOG00000000576	anaphase promoting complex subunit 16	ANAPC16	-0.754	1.28e-10	Rods
ENSRNOG00000000579	myristoylated alanine rich protein kinase C substrate	Marcks	0.363	0.000115	RGCs
ENSRNOG00000000580	calcium homeostasis modulator family member 4	CALHM4	0.22	0.804
ENSRNOG00000000581	cell division cycle 40	CDC40	-0.263	0.00666	Bipolar
ENSRNOG00000000582	D-aspartate oxidase	DDO	1.824	0.00013	Muller
ENSRNOG00000000583	cyclin dependent kinase 19	CDK19	-0.134	0.0605
ENSRNOG00000000585	adenosylmethionine decarboxylase 1	AMD1	-0.239	0.000133
ENSRNOG00000000586	general transcription factor IIIC subunit 6	GTF3C6	-0.254	0.00741	Muller
ENSRNOG00000000587	ribosome production factor 2 homolog	RPF2	-0.195	0.188
ENSRNOG00000000588	solute carrier family 16 member 10	SLC16A10	-0.387	0.207
ENSRNOG00000000593	REV3 like, DNA directed polymerase zeta catalytic subunit	REV3L	-0.374	8.22e-07
ENSRNOG00000000595	TRAF3 interacting protein 2	TRAF3IP2	0.601	0.00655
ENSRNOG00000000596	FYN proto-oncogene, Src family tyrosine kinase	FYN	0.246	0.00406
ENSRNOG00000000597	cellular communication network factor 6	CCN6	-0.114	0.891
ENSRNOG00000000598	tubulin epsilon 1	TUBE1	-0.511	0.000106	Bipolar
ENSRNOG00000000599	laminin subunit alpha 4	LAMA4	0.303	0.0551	Vascular
ENSRNOG00000000604	histone deacetylase 2	HDAC2	-0.41	6.85e-10	Amacrine
ENSRNOG00000000605	heparan sulfate-glucosamine 3-sulfotransferase 5	HS3ST5	0.472	0.0103
ENSRNOG00000000606	protocadherin related 15	PCDH15	-1.879	4.29e-80	Rods
ENSRNOG00000000609	inositol polyphosphate multikinase	IPMK	-1.007	3.1e-40	Rods
ENSRNOG00000000610	CDGSH iron sulfur domain 1	CISD1	-0.119	0.281
ENSRNOG00000000611	ubiquitin conjugating enzyme E2 D1	UBE2D1	0.115	0.5
ENSRNOG00000000613	transcription factor A, mitochondrial	TFAM	-0.11	0.426
ENSRNOG00000000614	BicC family RNA binding protein 1	BICC1	0.607	0.0118	Muller
ENSRNOG00000000618	MAM domain containing glycosylphosphatidylinositol anchor 2	MDGA2	0.176	0.193
ENSRNOG00000000622			0.14	0.147
ENSRNOG00000000632	cyclin dependent kinase 1	CDK1	-0.719	0.215	Vascular
ENSRNOG00000000633	Rho related BTB domain containing 1	RHOBTB1	-1.037	2.03e-10
ENSRNOG00000000634	ciliary associated calcium binding coiled-coil 1	CABCOCO1	-0.126	0.843
ENSRNOG00000000635	AT-rich interaction domain 5B	ARID5B	0.347	0.000539
ENSRNOG00000000636	rhotekin 2	RTKN2	-2.42	3.14e-23
ENSRNOG00000000638	zinc finger protein 365	ZNF365	-0.672	2.71e-34
ENSRNOG00000000639			0.033	0.882
ENSRNOG00000000640	early growth response 2	EGR2	3.155	0.0301
ENSRNOG00000000641	nuclear receptor binding factor 2	NRBF2	-1.115	2.34e-18	Microglia
ENSRNOG00000000645	receptor accessory protein 3	REEP3	-0.246	0.114	Vascular
ENSRNOG00000000648	jumonji domain containing 1C	JMJD1C	-0.545	4.13e-17
ENSRNOG00000000655	protein tyrosine phosphatase receptor type C	PTPRC	1.749	5.72e-09	Microglia
ENSRNOG00000000657	NIMA related kinase 7	NEK7	-0.15	0.385	Vascular
ENSRNOG00000000658	acetyl-CoA carboxylase beta	ACACB	0.149	0.782	Vascular
ENSRNOG00000000661	HPS4 biogenesis of lysosomal organelles complex 3 subunit 2	HPS4	-0.13	0.287
ENSRNOG00000000662	SRR1 domain containing	SRRD	0.094	0.666	Amacrine
ENSRNOG00000000663	tuftelin interacting protein 11	TFIP11	-0.243	0.0146	Bipolar
ENSRNOG00000000664	tyrosylprotein sulfotransferase 2	TPST2	0.295	0.0555
ENSRNOG00000000665	phosphatidylinositol transfer protein beta	PITPNB	0.036	0.692	Vascular
ENSRNOG00000000692	uracil DNA glycosylase	UNG	-0.001	0.998
ENSRNOG00000000693	SV2 related protein	SVOP	-0.361	9.73e-06
ENSRNOG00000000695	slingshot protein phosphatase 1	SSH1	0.342	0.00283	Horizontal
ENSRNOG00000000697	coronin 1C	CORO1C	0.232	0.00272
ENSRNOG00000000699	selectin P ligand	SELPLG	2.195	5.23e-12	Microglia
ENSRNOG00000000700	transmembrane protein 119	TMEM119	1.536	1.04e-06	Microglia
ENSRNOG00000000701	iron-sulfur cluster assembly enzyme	ISCU	0.298	0.00848	RGCs
ENSRNOG00000000702	spliceosome associated factor 3, U4/U6 recycling protein	SART3	-0.168	0.0373	Amacrine
ENSRNOG00000000704	chemerin chemokine-like receptor 1	CMKLR1	2.073	4.64e-05	Microglia
ENSRNOG00000000708	small G protein signaling modulator 1	SGSM1	0.819	4.31e-11	Amacrine
ENSRNOG00000000716	5-hydroxytryptamine receptor 1F	HTR1F	-2.659	2.24e-22	Muller
ENSRNOG00000000718	CGG triplet repeat binding protein 1	CGGBP1	0.113	0.34	Amacrine
ENSRNOG00000000720	similar to human chromosome 3 open reading frame 38	C11h3orf38/LOC100362724	-0.198	0.42
ENSRNOG00000000723			1.076	0.159
ENSRNOG00000000728	chloride intracellular channel 2	CLIC2	0.476	0.285
ENSRNOG00000000729	trimethyllysine hydroxylase, epsilon	TMLHE	0.077	0.787
ENSRNOG00000000748			1.331	0.0412
ENSRNOG00000000763	major histocompatibility complex, class I, G	HLA-G	0.796	0.00129
ENSRNOG00000000774	gamma-aminobutyric acid type B receptor subunit 1	GABBR1	0.288	1.89e-05	Bipolar
ENSRNOG00000000775	myelin oligodendrocyte glycoprotein	MOG	0.063	0.809
ENSRNOG00000000777	major histocompatibility complex, class I, E	HLA-E	1.611	0.000447
ENSRNOG00000000778	RNA polymerase I subunit H, antisense	Polr1has	-0.449	0.0068
ENSRNOG00000000779	RNA polymerase I subunit H	POLR1H	-0.309	0.0806
ENSRNOG00000000780	protein phosphatase 1 regulatory inhibitor subunit 11	PPP1R11	0.453	1.65e-05	Muller
ENSRNOG00000000781	ring finger protein 39	RNF39	0.33	0.0932
ENSRNOG00000000785	tripartite motif containing 39	TRIM39	-0.536	3.22e-13	Muller
ENSRNOG00000000786	ribonuclease P/MRP subunit p21	RPP21	0.022	0.928	Bipolar
ENSRNOG00000000787			1.105	0.0337
ENSRNOG00000000795	histocompatibility 2, T region locus 22	H2-T22	0.548	0.26
ENSRNOG00000000796	RAN binding protein 2	Ranbp2	-0.515	8.92e-12	Rods
ENSRNOG00000000798	G protein nucleolar 1 (putative)	GNL1	0.126	0.09	Bipolar
ENSRNOG00000000799	ATP binding cassette subfamily F member 1	ABCF1	-0.21	0.00224
ENSRNOG00000000800	mannosidase alpha class 1A member 1	MAN1A1	0.4	0.0214
ENSRNOG00000000801	MSL3 like 2	Msl3l2	0.767	1.11e-05
ENSRNOG00000000802	TBC1 domain family, member 32	Tbc1d32	-1.458	8e-25	Rods
ENSRNOG00000000804	mitochondrial ribosomal protein S18B	MRPS18B	0.259	0.035	Bipolar
ENSRNOG00000000805	gap junction protein alpha 1	GJA1	-0.648	0.732	Vascular
ENSRNOG00000000808	heat shock transcription factor 2	HSF2	-0.52	3.35e-07
ENSRNOG00000000809	alpha tubulin acetyltransferase 1	ATAT1	-0.014	0.92	Muller
ENSRNOG00000000811	cAMP-dependent protein kinase inhibitor beta	PKIB	1.091	0.0413
ENSRNOG00000000812			-0.338	0.00439
ENSRNOG00000000815	sphingomyelin phosphodiesterase acid like 3A	SMPDL3A	1.269	0.00776
ENSRNOG00000000816			-0.139	0.343
ENSRNOG00000000818			-1.212	1.57e-19
ENSRNOG00000000823	GRIP and coiled-coil domain containing 2	GCC2	-0.417	3.99e-08
ENSRNOG00000000824	dermatan sulfate epimerase	DSE	0.004	0.995	Microglia
ENSRNOG00000000826	flotillin 1	FLOT1	0.579	4.32e-15
ENSRNOG00000000827	immediate early response 3	IER3	1.028	6.2e-07	Muller
ENSRNOG00000000831	general transcription factor IIH subunit 4	GTF2H4	-0.484	0.00014
ENSRNOG00000000833	valyl-tRNA synthetase 2, mitochondrial	VARS2	0.037	0.74	Bipolar
ENSRNOG00000000839	NFKB inhibitor like 1	NFKBIL1	0.319	0.00998
ENSRNOG00000000840	ATPase H+ transporting V1 subunit G2	ATP6V1G2	0.375	4.38e-05
ENSRNOG00000000841	DExD-box helicase 39B	DDX39B	-0.169	0.0216
ENSRNOG00000000842	DDAH family member 2, ADMA-independent	DDAH2	0.292	0.0166
ENSRNOG00000000844			0.217	0.56
ENSRNOG00000000847	casein kinase 2 beta	CSNK2B	-0.154	0.147	Amacrine
ENSRNOG00000000848	G-patch domain and ankyrin repeats 1	GPANK1	-0.43	0.000499	Amacrine
ENSRNOG00000000850	apolipoprotein M	APOM	0.481	0.216	Muller
ENSRNOG00000000851	BAG cochaperone 6	BAG6	-0.092	0.234
ENSRNOG00000000852	proline rich coiled-coil 2A	PRRC2A	0.132	0.0635	Bipolar
ENSRNOG00000000853	allograft inflammatory factor 1	AIF1	1.788	3.12e-13	Microglia
ENSRNOG00000000857	mutS homolog 5	MSH5	-2.245	5.76e-10	Rods
ENSRNOG00000000858	suppressor APC domain containing 1	SAPCD1	0.565	0.00737	Amacrine
ENSRNOG00000000860	von Willebrand factor A domain containing 7	VWA7	0.236	0.327
ENSRNOG00000000861	Zic family member 3	Zic3	-0.481	0.238
ENSRNOG00000000866	RNA binding motif protein X-linked	RBMX	-0.195	0.0643	Bipolar
ENSRNOG00000000867	valyl-tRNA synthetase 1	VARS1	0.09	0.353
ENSRNOG00000000869	Rac/Cdc42 guanine nucleotide exchange factor 6	ARHGEF6	0.078	0.776	Microglia
ENSRNOG00000000875	four and a half LIM domains 1	FHL1	0.304	0.00762
ENSRNOG00000000878	solute carrier family 44 member 4	SLC44A4	-0.138	0.805	Muller
ENSRNOG00000000879	solute carrier family 9 member A6	SLC9A6	0.275	5.24e-06
ENSRNOG00000000881			-0.247	0.00481
ENSRNOG00000000885	activator of transcription and developmental regulator AUTS2	AUTS2	0.395	0.00116
ENSRNOG00000000886	calneuron 1	CALN1	0.437	0.0626	Amacrine
ENSRNOG00000000888	SBDS ribosome maturation factor	SBDS	0.161	0.0887	Muller
ENSRNOG00000000889	predicted gene 1527	Gm1527/Gm6558	-0.103	0.908
ENSRNOG00000000891	zinc finger protein 709-like	LOC102548389	-0.012	0.963
ENSRNOG00000000893	transmembrane protein 248	TMEM248	0.182	0.28	Muller
ENSRNOG00000000894	FRY microtubule binding protein	FRY	0.715	1.11e-14
ENSRNOG00000000895	RAB guanine nucleotide exchange factor 1	RABGEF1	-1.663	8.37e-82	Rods
ENSRNOG00000000900	tyrosylprotein sulfotransferase 1	TPST1	-0.359	0.00609	Muller
ENSRNOG00000000901	CGRP receptor component	CRCP	-0.97	5.75e-38	Amacrine
ENSRNOG00000000902	heat shock protein family H (Hsp110) member 1	HSPH1	0.524	1.02e-07
ENSRNOG00000000903	argininosuccinate lyase	ASL	0.291	0.0846
ENSRNOG00000000906	mesenteric estrogen dependent adipogenesis	MEDAG	-0.324	0.458	Vascular
ENSRNOG00000000907	arachidonate 5-lipoxygenase activating protein	ALOX5AP	2.01	7.72e-08	Microglia
ENSRNOG00000000909	ubiquitin specific peptidase like 1	USPL1	-0.425	3.2e-06	Bipolar
ENSRNOG00000000913	glucuronidase beta	GUSB	-0.267	0.0932	Microglia
ENSRNOG00000000917	nuclear protein 2, transcriptional regulator	NUPR2	-0.591	0.00455
ENSRNOG00000000918	zinc finger BED-type containing 5	ZBED5	-0.411	0.0527	Bipolar
ENSRNOG00000000920	phosphorylase kinase catalytic subunit gamma 1	PHKG1	-0.151	0.794	Horizontal
ENSRNOG00000000921	ubiquitin like 3	UBL3	0.331	0.000306
ENSRNOG00000000922	sulfatase modifying factor 2	SUMF2	-0.261	0.156
ENSRNOG00000000923	chaperonin containing TCP1 subunit 6A	CCT6A	-0.142	0.137
ENSRNOG00000000924	solute carrier family 7 member 1	SLC7A1	-0.008	0.969
ENSRNOG00000000925	phosphoserine phosphatase	PSPH	-0.154	0.394	Muller
ENSRNOG00000000926	mitochondrial ribosomal protein S17	MRPS17	0.058	0.763
ENSRNOG00000000931	splicing factor SWAP	SFSWAP	-0.226	0.00728	Bipolar
ENSRNOG00000000934	piwi like RNA-mediated gene silencing 1	PIWIL1	-2	0.00583	Rods
ENSRNOG00000000936	syntaxin 2	STX2	0.21	0.116	Rods
ENSRNOG00000000937	solute carrier family 46 member 3	SLC46A3	-0.489	0.00031
ENSRNOG00000000938	RAN, member RAS oncogene family	RAN	0.427	5.39e-16	RGCs
ENSRNOG00000000940	Fms related receptor tyrosine kinase 1	Flt1	0.985	4.33e-19
ENSRNOG00000000942	poly(A) specific ribonuclease subunit PAN3	PAN3	-0.343	7.29e-06
ENSRNOG00000000954	RNA polymerase I and III subunit D	Polr1d	-0.142	0.216
ENSRNOG00000000955	ligand of numb-protein X 2	LNX2	-1.254	8.36e-10
ENSRNOG00000000956	RAS like family 11 member A	RASL11A	-1.459	4.5e-11	Vascular
ENSRNOG00000000957	ribosomal protein L21	RPL21	-0.176	0.0402
ENSRNOG00000000958			-0.689	0.078
ENSRNOG00000000961	glycosyltransferase 1 domain containing 1	GLT1D1	0.81	9.6e-08	Muller
ENSRNOG00000000962	solute carrier family 15 member 4	SLC15A4	0.016	0.928	Muller
ENSRNOG00000000963	transmembrane protein 132C	TMEM132C	0.365	0.0247	Bipolar
ENSRNOG00000000967	acetoacetyl-CoA synthetase	AACS	-0.46	3.32e-10	RGCs
ENSRNOG00000000968	ring finger protein 6	RNF6	-0.095	0.327
ENSRNOG00000000974	zinc finger protein 358	ZNF358	-0.137	0.314
ENSRNOG00000000975	mucolipin TRP cation channel 1	MCOLN1	0.146	0.0541	Amacrine
ENSRNOG00000000977	patatin like phospholipase domain containing 6	PNPLA6	0.132	0.139	Horizontal
ENSRNOG00000000979			0.116	0.614
ENSRNOG00000000981	scavenger receptor class B member 1	SCARB1	-1.093	5.97e-35
ENSRNOG00000000983	zinc finger protein 394	ZNF394	-0.339	0.00941	Microglia
ENSRNOG00000000985	cleavage and polyadenylation specific factor 4	CPSF4	-0.071	0.567	Muller
ENSRNOG00000000986	calmodulin regulated spectrin associated protein family member 3	CAMSAP3	-0.062	0.609	Bipolar
ENSRNOG00000000987	ATP5MF-PTCD1 readthrough	ATP5MF-PTCD1	-0.247	0.116
ENSRNOG00000000988	XPA binding protein 2	XAB2	-0.094	0.359	Bipolar
ENSRNOG00000000989	BUD31 homolog	BUD31	-0.341	0.00088	Microglia
ENSRNOG00000000990	PDGFA associated protein 1	PDAP1	0.087	0.292
ENSRNOG00000000991	actin related protein 2/3 complex subunit 1B	ARPC1B	1.038	0.00513
ENSRNOG00000000993	Purkinje cell protein 2	PCP2	1.036	9.14e-21	Bipolar
ENSRNOG00000000994	syntaxin binding protein 2	STXBP2	0.222	0.0725	Microglia
ENSRNOG00000000996	actin related protein 2/3 complex subunit 1A	ARPC1A	0.128	0.115	RGCs
ENSRNOG00000000999	SMAD specific E3 ubiquitin protein ligase 1	SMURF1	0.095	0.372	Bipolar
ENSRNOG00000001003	trafficking protein particle complex subunit 5	TRAPPC5	-0.177	0.0843
ENSRNOG00000001004	nuclear receptor corepressor 2	NCOR2	0.368	3.51e-05	Bipolar
ENSRNOG00000001005	Fc epsilon receptor II	FCER2	-1.439	0.0995
ENSRNOG00000001006	neuronal pentraxin 2	NPTX2	0.607	4.75e-11	Bipolar
ENSRNOG00000001007	BAR/IMD domain containing adaptor protein 2 like 1	BAIAP2L1	-0.639	0.0302	Vascular
ENSRNOG00000001009	brain protein I3	BRI3	0.084	0.72
ENSRNOG00000001010	tectonin beta-propeller repeat containing 1	TECPR1	-0.562	4.09e-16
ENSRNOG00000001011			0.479	0.265
ENSRNOG00000001030	TSC22 domain family member 1	TSC22D1	-0.089	0.319
ENSRNOG00000001032	CCZ1 homolog, vacuolar protein trafficking and biogenesis associated	CCZ1/CCZ1B	-0.421	7.71e-06
ENSRNOG00000001033	nuclear FMR1 interacting protein 1	NUFIP1	-0.252	0.0825	Muller
ENSRNOG00000001034	ecotropic viral integration site 5 like	Evi5l	0.029	0.778	Horizontal
ENSRNOG00000001035	general transcription factor IIH subunit 3	GTF2H3	-0.322	0.0535	Muller
ENSRNOG00000001036	radial spoke head 10 homolog B	RSPH10B/RSPH10B2	-0.147	0.776
ENSRNOG00000001037	GPALPP motifs containing 1	GPALPP1	-0.198	0.12	Bipolar
ENSRNOG00000001039	eukaryotic translation initiation factor 2B subunit alpha	EIF2B1	-0.162	0.228	Muller
ENSRNOG00000001040	PMS1 homolog 2, mismatch repair system component	Pms2	-0.639	2.38e-14	Bipolar
ENSRNOG00000001043	DEAD-box helicase 55	DDX55	-0.46	0.000417	Amacrine
ENSRNOG00000001044	aminoacyl tRNA synthetase complex interacting multifunctional protein 2	AIMP2	-0.114	0.418
ENSRNOG00000001047	mitogen-activated protein kinase kinase 7	MAP2K7	-0.314	0.000142	Bipolar
ENSRNOG00000001048	ankyrin repeat domain 61	ANKRD61	-0.063	0.789
ENSRNOG00000001049	tumor protein, translationally-controlled 1	TPT1	0.174	0.0399
ENSRNOG00000001050	eukaryotic translation initiation factor 2 alpha kinase 1	EIF2AK1	-0.074	0.414	Muller
ENSRNOG00000001052	solute carrier family 25 member 30	SLC25A30	1.441	1.39e-18	Microglia
ENSRNOG00000001053	transmembrane p24 trafficking protein 2	TMED2	-0.003	0.974
ENSRNOG00000001055	Rab interacting lysosomal protein like 1	RILPL1	0.221	0.123
ENSRNOG00000001056	small nuclear RNA activating complex polypeptide 2	SNAPC2	0.58	5.26e-05	Amacrine
ENSRNOG00000001057			-0.045	0.87
ENSRNOG00000001058	translocase of inner mitochondrial membrane 44	TIMM44	-0.346	0.000146	Rods
ENSRNOG00000001059	ubiquitin specific peptidase 42	USP42	-0.086	0.373	Bipolar
ENSRNOG00000001060	small nuclear ribonucleoprotein U11/U12 subunit 35	SNRNP35	0.054	0.699
ENSRNOG00000001061	Rab interacting lysosomal protein like 2	RILPL2	-0.192	0.359	Microglia
ENSRNOG00000001062			-0.187	0.169
ENSRNOG00000001064	strawberry notch homolog 1	SBNO1	-0.248	3.78e-05
ENSRNOG00000001065	cytohesin 3	CYTH3	0.409	1.97e-08
ENSRNOG00000001068	Rac family small GTPase 1	RAC1	0.46	0.000264
ENSRNOG00000001069	ELAV like RNA binding protein 1	ELAVL1	-0.137	0.335
ENSRNOG00000001070	cyclin dependent kinase 2 associated protein 1	CDK2AP1	0.018	0.924	Muller
ENSRNOG00000001072	ceramide synthase 4	CERS4	-1.187	4.55e-112	Muller
ENSRNOG00000001073	mitochondrial translation release factor in rescue	MTRFR	0.199	0.379
ENSRNOG00000001074	M-phase phosphoprotein 9	MPHOSPH9	-0.535	1.86e-07	Bipolar
ENSRNOG00000001079	diacylglycerol lipase beta	DAGLB	-0.53	5.87e-06	Microglia
ENSRNOG00000001080	ADP ribosylation factor like GTPase 6 interacting protein 4	ARL6IP4	0.171	0.201	Horizontal
ENSRNOG00000001081	2-oxoglutarate and iron dependent oxygenase domain containing 2	OGFOD2	-0.285	0.201	Muller
ENSRNOG00000001082	ATP binding cassette subfamily B member 9	ABCB9	0.23	0.0776	Muller
ENSRNOG00000001083	KDEL endoplasmic reticulum protein retention receptor 2	KDELR2	-0.478	2.29e-08	Microglia
ENSRNOG00000001086	VPS37B subunit of ESCRT-I	VPS37B	-0.36	2.57e-05
ENSRNOG00000001088	replication factor C subunit 3	RFC3	-0.239	0.0888	Bipolar
ENSRNOG00000001090	StAR related lipid transfer domain containing 13	STARD13	0.278	0.0178	Vascular
ENSRNOG00000001091	huntingtin interacting protein 1 related	HIP1R	0.157	0.151	Amacrine
ENSRNOG00000001092	klotho	KL	0.345	0.163	Bipolar
ENSRNOG00000001094	zinc finger protein 316	ZNF316	-0.112	0.434
ENSRNOG00000001098	PDS5 cohesin associated factor B	PDS5B	-0.066	0.252
ENSRNOG00000001099	RB associated KRAB zinc finger	RBAK	-0.232	0.167
ENSRNOG00000001101	ring finger protein 216	RNF216	-0.029	0.805	Muller
ENSRNOG00000001103	sidekick cell adhesion molecule 1	SDK1	0.453	0.000797
ENSRNOG00000001104	forkhead box K1	FOXK1	0.038	0.777
ENSRNOG00000001106	density regulated re-initiation and release factor	DENR	0.199	0.0679
ENSRNOG00000001107			0.252	0.208
ENSRNOG00000001108	NEDD4 binding protein 2 like 2	N4BP2L2	-0.433	8.6e-06
ENSRNOG00000001111	BRCA2 DNA repair associated	BRCA2	-0.038	0.881	Microglia
ENSRNOG00000001113	monocyte to macrophage differentiation associated 2	MMD2	-0.045	0.682	Muller
ENSRNOG00000001114	WD repeat domain, phosphoinositide interacting 2	WIPI2	-0.001	0.992	Amacrine
ENSRNOG00000001115	solute carrier family 29 member 4	SLC29A4	0.488	0.000246	Horizontal
ENSRNOG00000001117	F-box and leucine rich repeat protein 18	FBXL18	0.125	0.727	Bipolar
ENSRNOG00000001120	mediator complex subunit 13L	MED13L	-0.915	3.69e-57
ENSRNOG00000001123	SREBF pathway regulator in golgi 1	SPRING1	0.05	0.705
ENSRNOG00000001124	ring finger protein, transmembrane 2	RNFT2	0.011	0.943
ENSRNOG00000001126	F-box and WD repeat domain containing 8	FBXW8	-0.01	0.944	Bipolar
ENSRNOG00000001128	tescalcin	TESC	0.46	0.536	RGCs
ENSRNOG00000001129	F-box protein 21	FBXO21	0.083	0.308
ENSRNOG00000001130	nitric oxide synthase 1	NOS1	0.421	0.0156
ENSRNOG00000001134	replication factor C subunit 5	RFC5	-0.181	0.19	Muller
ENSRNOG00000001135	WD repeat and SOCS box containing 2	WSB2	0.303	7.53e-05
ENSRNOG00000001136	phosphatidylethanolamine binding protein 1	PEBP1	0.07	0.567
ENSRNOG00000001138	TAO kinase 3	TAOK3	-0.804	3.8e-29	Rods
ENSRNOG00000001139	SDS3 homolog, SIN3A corepressor complex component	SUDS3	-0.281	0.00755	Bipolar
ENSRNOG00000001141	serine/arginine repetitive matrix 4	Srrm4	-0.057	0.61
ENSRNOG00000001142	protein kinase AMP-activated non-catalytic subunit beta 1	PRKAB1	-0.548	5.03e-10	Rods
ENSRNOG00000001143	citron rho-interacting serine/threonine kinase	CIT	0.063	0.637	Muller
ENSRNOG00000001148	ribosomal protein lateral stalk subunit P0	RPLP0	-0.478	8.28e-10	Rods
ENSRNOG00000001149	paxillin	PXN	-0.546	3.29e-08	Rods
ENSRNOG00000001151	sirtuin 4	SIRT4	-0.828	3.24e-06
ENSRNOG00000001153	phospholipase A2 group IB	PLA2G1B	-0.938	0.00171
ENSRNOG00000001156	musashi RNA binding protein 1	MSI1	-1.311	1.48e-82	Rods
ENSRNOG00000001158	ATP binding cassette subfamily G member 1	ABCG1	-0.483	1.23e-11	Rods
ENSRNOG00000001161			-0.246	0.034
ENSRNOG00000001163	serine and arginine rich splicing factor 9	SRSF9	-0.202	0.0239
ENSRNOG00000001169	solute carrier family 37 member 1	SLC37A1	0.177	0.571	Muller
ENSRNOG00000001170	cytochrome c oxidase subunit 6A1	COX6A1	-0.174	0.135
ENSRNOG00000001171	coenzyme Q5, methyltransferase	COQ5	0.022	0.907	Amacrine
ENSRNOG00000001172	ring finger protein 10	RNF10	-0.248	0.000481
ENSRNOG00000001173	calcium binding protein 1	CABP1	0.855	1.68e-16
ENSRNOG00000001174	phosphodiesterase 9A	PDE9A	0.385	0.000145
ENSRNOG00000001177	acyl-CoA dehydrogenase short chain	ACADS	0.439	0.101	Microglia
ENSRNOG00000001178	signal peptide peptidase like 3	SPPL3	0.043	0.63	Muller
ENSRNOG00000001181	WD repeat domain 4	WDR4	-0.006	0.984
ENSRNOG00000001182	NADH:ubiquinone oxidoreductase subunit V3	NDUFV3	0.088	0.511	Bipolar
ENSRNOG00000001183	HNF1 homeobox A	HNF1A	0.391	0.766
ENSRNOG00000001184	PBX/knotted 1 homeobox 1	PKNOX1	-0.222	0.0399
ENSRNOG00000001185	chromosome 12 open reading frame 43	C12orf43	0.154	0.0539
ENSRNOG00000001187	2'-5'-oligoadenylate synthetase like	OASL	-1.341	2.74e-05
ENSRNOG00000001189	salt inducible kinase 1	Sik1	0.966	8.55e-09
ENSRNOG00000001190	GIT ArfGAP 2	GIT2	0.019	0.861	Microglia
ENSRNOG00000001191	trichoplein keratin filament binding	TCHP	-0.089	0.391	Bipolar
ENSRNOG00000001192	glycolipid transfer protein	GLTP	1.375	4.46e-18
ENSRNOG00000001193	heat shock transcription factor 2 binding protein	HSF2BP	-0.701	0.436	Muller
ENSRNOG00000001194	ribosomal RNA processing 1B	RRP1B	-1.868	3.92e-242	Rods
ENSRNOG00000001195	transient receptor potential cation channel subfamily V member 4	TRPV4	1.138	0.00975
ENSRNOG00000001198	family with sequence similarity 222 member A	FAM222A	-0.928	1.34e-16	Rods
ENSRNOG00000001199	POP5 homolog, ribonuclease P/MRP subunit	POP5	-0.068	0.703
ENSRNOG00000001201	cystatin B	CSTB	0.203	0.214
ENSRNOG00000001203	ribosomal RNA processing 1	RRP1	0.072	0.565	Bipolar
ENSRNOG00000001204	ankyrin repeat domain 13A	ANKRD13A	0.227	0.032	Microglia
ENSRNOG00000001205	1-acylglycerol-3-phosphate O-acyltransferase 3	AGPAT3	-1.931	5.97e-193	Rods
ENSRNOG00000001210	PWP2 periodic tryptophan protein homolog (yeast)	Pwp2	0.039	0.727	Bipolar
ENSRNOG00000001211	glutamine amidotransferase class 1 domain containing 3	GATD3/LOC102724023	0.115	0.221
ENSRNOG00000001214	phosphofructokinase, liver type	PFKL	-0.307	0.000667
ENSRNOG00000001215	cilia and flagella associated protein 410	CFAP410	0.018	0.914
ENSRNOG00000001216	transient receptor potential cation channel subfamily M member 2	TRPM2	-0.943	1.29e-24
ENSRNOG00000001217	leucine rich repeat containing 3	LRRC3	0.162	0.768
ENSRNOG00000001219	thrombospondin-type laminin G domain and EAR repeats	Tspear	1.115	0.0999	Rods
ENSRNOG00000001222	ubiquitin conjugating enzyme E2 G2	UBE2G2	-0.11	0.232	Bipolar
ENSRNOG00000001223	PTTG1 interacting protein	PTTG1IP	-0.015	0.92
ENSRNOG00000001224	integrin subunit beta 2	ITGB2	3.028	3.39e-33	Microglia
ENSRNOG00000001225	SLX9 ribosome biogenesis factor	SLX9	-0.104	0.421
ENSRNOG00000001227	adenosine deaminase RNA specific B1	ADARB1	0.817	8.81e-31
ENSRNOG00000001228	protein O-fucosyltransferase 2	POFUT2	0.091	0.441	Muller
ENSRNOG00000001229	collagen type XVIII alpha 1 chain	COL18A1	0.029	0.955
ENSRNOG00000001232	solute carrier family 19 member 1	SLC19A1	-0.42	0.0153	Vascular
ENSRNOG00000001235	G protein subunit alpha 12	GNA12	0.675	9.37e-11
ENSRNOG00000001236	BRCA1 associated ATM activator 1	BRAT1	-0.269	0.0016
ENSRNOG00000001237	calcineurin binding protein 1	CABIN1	-0.242	0.00268
ENSRNOG00000001238	arginine/serine-rich coiled-coil 2	Rsrc2	-0.509	5.85e-12	Rods
ENSRNOG00000001239			0.577	1.19e-07
ENSRNOG00000001241	IQ motif containing E	IQCE	0.048	0.752	Rods
ENSRNOG00000001242	glutathione S-transferase, theta 3	Gstt3	0.492	0.00669
ENSRNOG00000001243	zinc finger CCHC-type containing 8	Zcchc8	-0.655	1.83e-11	Microglia
ENSRNOG00000001245	poly(rC) binding protein 3	PCBP3	0.186	0.00816
ENSRNOG00000001247	CAP-GLY domain containing linker protein 1	Clip1	-0.324	1.63e-07
ENSRNOG00000001249	collagen type VI alpha 1 chain	COL6A1	0.367	0.107
ENSRNOG00000001250	LFNG O-fucosylpeptide 3-beta-N-acetylglucosaminyltransferase	LFNG	1.803	3.02e-35	Muller
ENSRNOG00000001251	galectin-related inter-fiber protein	Grifin	-2.098	0.224
ENSRNOG00000001252	carbohydrate sulfotransferase 12	CHST12	0.79	1.42e-05
ENSRNOG00000001253	eukaryotic translation initiation factor 3 subunit B	EIF3B	0.04	0.735
ENSRNOG00000001254	collagen type VI alpha 2 chain	COL6A2	-0.187	0.797	Vascular
ENSRNOG00000001255	MLX interacting protein	MLXIP	0.708	8.38e-09
ENSRNOG00000001256	ataxin 2	ATXN2	-0.216	0.00356
ENSRNOG00000001258	sorting nexin 8	SNX8	-0.235	0.0627	Horizontal
ENSRNOG00000001259	cut like homeobox 2	CUX2	0.638	3.25e-09
ENSRNOG00000001260	nudix hydrolase 1	NUDT1	-0.38	0.375	Microglia
ENSRNOG00000001261	formimidoyltransferase cyclodeaminase	FTCD	0.917	0.0326	Horizontal
ENSRNOG00000001265	mitotic arrest deficient 1 like 1	MAD1L1	-0.312	0.02	RGCs
ENSRNOG00000001269	protein phosphatase 1 catalytic subunit gamma	Ppp1cc	-0.534	4.12e-30
ENSRNOG00000001270	hydrogen voltage gated channel 1	HVCN1	-0.339	0.381	Microglia
ENSRNOG00000001271	caspase recruitment domain family member 6	CARD6	0.319	0.349
ENSRNOG00000001272	minichromosome maintenance complex component 3 associated protein	MCM3AP	-0.303	2.12e-06	Bipolar
ENSRNOG00000001273	proteasome assembly chaperone 3	PSMG3	-0.247	0.382
ENSRNOG00000001274	VPS29 retromer complex component	VPS29	0.135	0.153	Amacrine
ENSRNOG00000001275	transmembrane protein 184A	TMEM184A	3.431	0.0207
ENSRNOG00000001276	pericentrin	PCNT	-0.04	0.729
ENSRNOG00000001277			0.571	0.000283
ENSRNOG00000001278	GPN-loop GTPase 3	GPN3	-0.248	0.0435	Microglia
ENSRNOG00000001283	anaphase promoting complex subunit 7	ANAPC7	-0.074	0.478
ENSRNOG00000001285	ATPase sarcoplasmic/endoplasmic reticulum Ca2+ transporting 2	ATP2A2	0.042	0.597
ENSRNOG00000001287	G protein-coupled estrogen receptor 1	GPER1	-0.271	0.638	Vascular
ENSRNOG00000001288	G protein-coupled receptor 146	GPR146	-0.329	0.0443
ENSRNOG00000001289	chromosome 7 open reading frame 50	C7orf50	0.094	0.591	Amacrine
ENSRNOG00000001293	guided entry of tail-anchored proteins factor 4	GET4	-0.209	0.0132	Horizontal
ENSRNOG00000001294	intraflagellar transport 81	IFT81	-1.014	8.17e-36
ENSRNOG00000001295	S100 calcium binding protein B	S100B	1.458	2.5e-43	RGCs
ENSRNOG00000001296	purinergic receptor P2X 7	P2rx7	2.444	6.72e-10	Microglia
ENSRNOG00000001297	protein arginine methyltransferase 2	PRMT2	0.741	1.56e-13
ENSRNOG00000001299	Sad1 and UNC84 domain containing 1	SUN1	-0.213	0.000143
ENSRNOG00000001300	purinergic receptor P2X 4	P2RX4	1.003	7.39e-10	Microglia
ENSRNOG00000001302	adenosine A2a receptor	ADORA2A	0.589	0.0246	Vascular
ENSRNOG00000001303	sperm antigen with calponin homology and coiled-coil domains 1 like	SPECC1L	-0.287	0.00497	Muller
ENSRNOG00000001304	BCR activator of RhoGEF and GTPase	BCR	0.578	3.94e-06	Bipolar
ENSRNOG00000001309	calcium/calmodulin dependent protein kinase kinase 2	CAMKK2	-0.404	0.000842
ENSRNOG00000001311	RAB36, member RAS oncogene family	RAB36	0.512	0.00173
ENSRNOG00000001312	platelet derived growth factor subunit A	PDGFA	0.301	0.0372
ENSRNOG00000001313	G protein subunit alpha z	GNAZ	-0.284	0.00221
ENSRNOG00000001314	FAM20C golgi associated secretory pathway kinase	FAM20C	0.675	3.59e-06
ENSRNOG00000001315	radial spoke head 14 homolog	RSPH14	-2.337	0.00444
ENSRNOG00000001316	anaphase promoting complex subunit 5	ANAPC5	-0.091	0.209	Bipolar
ENSRNOG00000001317	zinc finger protein 68	Zfp68	-0.422	7.27e-07
ENSRNOG00000001323	zinc finger protein 613	ZNF613	-0.368	0.00126
ENSRNOG00000001324	acetylserotonin O-methyltransferase	ASMT	-0.291	0.176
ENSRNOG00000001325	interleukin 3 receptor subunit alpha	IL3RA	0.277	0.0943	Vascular
ENSRNOG00000001331	ring finger protein 34	RNF34	-0.148	0.119	Bipolar
ENSRNOG00000001335	zinc finger with KRAB and SCAN domains 1	ZKSCAN1	-0.121	0.324
ENSRNOG00000001336	ORAI calcium release-activated calcium modulator 1	ORAI1	-0.201	0.361
ENSRNOG00000001337	SET domain containing 1A, histone lysine methyltransferase	Setd1a	-0.074	0.54
ENSRNOG00000001339			-0.152	0.253
ENSRNOG00000001341			-0.692	9.95e-06
ENSRNOG00000001342	cilia and flagella associated protein 251	CFAP251	0.216	0.0466
ENSRNOG00000001344			0.923	0.0492
ENSRNOG00000001345	MAPK activated protein kinase 5	MAPKAPK5	-0.239	0.027	Bipolar
ENSRNOG00000001346	COP9 signalosome subunit 6	COPS6	0.169	0.0327	Bipolar
ENSRNOG00000001347	a disintegrin and metallopeptidase domain 1a	Adam1a	-0.075	0.601
ENSRNOG00000001348	endoplasmic reticulum protein 29	ERP29	0.157	0.275
ENSRNOG00000001349	minichromosome maintenance complex component 7	MCM7	-0.193	0.0761
ENSRNOG00000001350	N-alpha-acetyltransferase 25, NatB auxiliary subunit	NAA25	-0.274	0.00173
ENSRNOG00000001351	TRAF-type zinc finger domain containing 1	TRAFD1	-0.356	3.77e-05
ENSRNOG00000001352	HECT domain E3 ubiquitin protein ligase 4	HECTD4	0.053	0.477
ENSRNOG00000001353	adaptor related protein complex 4 subunit mu 1	AP4M1	-0.21	0.193	Rods
ENSRNOG00000001355	TATA-box binding protein associated factor 6	TAF6	-0.151	0.0839	Bipolar
ENSRNOG00000001357			-0.383	0.0694
ENSRNOG00000001360	STAG3 cohesin complex component	STAG3	-0.332	0.581	RGCs
ENSRNOG00000001367	glypican 2	GPC2	-1.976	2.71e-14
ENSRNOG00000001368	rabphilin 3A	RPH3A	0.565	2.81e-11	Bipolar
ENSRNOG00000001369	2'-5'-oligoadenylate synthetase 1	OAS1	2.934	1.33e-06
ENSRNOG00000001374	RAS protein activator like 1	RASAL1	0.38	0.136
ENSRNOG00000001375	galactose-3-O-sulfotransferase 4	GAL3ST4	0.078	0.865
ENSRNOG00000001376	thiol methyltransferase 1A	TMT1A	0.962	7.57e-33
ENSRNOG00000001377	DEAD-box helicase 54	DDX54	0.143	0.247	Muller
ENSRNOG00000001378			-1.05	9.25e-05
ENSRNOG00000001379	CYP3A7-CYP3A51P readthrough	CYP3A7-CYP3A51P	0.153	0.64
ENSRNOG00000001383	solute carrier family 8 member B1	SLC8B1	0.435	0.233
ENSRNOG00000001385	phospholipase B domain containing 2	PLBD2	0.274	0.0473	RGCs
ENSRNOG00000001387	methylphosphate capping enzyme	Mepce	1.195	0.11	Muller
ENSRNOG00000001388	serine dehydratase	SDS	-0.147	0.746	Muller
ENSRNOG00000001389	insulin receptor substrate 3	Irs3	0.28	0.602
ENSRNOG00000001391	serine dehydratase like	SDSL	0.627	0.0216	Muller
ENSRNOG00000001396	motile sperm domain containing 3	MOSPD3	0.145	0.335
ENSRNOG00000001397	RNA binding motif protein 19	RBM19	0.151	0.213	Bipolar
ENSRNOG00000001399	T-box transcription factor 5	TBX5	1.234	0.000291
ENSRNOG00000001402	leucine rich repeats and calponin homology domain containing 4	LRCH4	0.055	0.667	Vascular
ENSRNOG00000001404	ArfGAP with FG repeats 2	Agfg2	0.591	0.000273	Bipolar
ENSRNOG00000001407	transferrin receptor 2	TFR2	0.536	0.000651
ENSRNOG00000001408	actin like 6B	ACTL6B	0.105	0.478	RGCs
ENSRNOG00000001409	G protein subunit beta 2	GNB2	0.618	4.52e-14
ENSRNOG00000001410	GRB10 interacting GYF protein 1	GIGYF1	0.138	0.166
ENSRNOG00000001414	serpin family E member 1	SERPINE1	0.478	0.535	Vascular
ENSRNOG00000001415	adaptor related protein complex 1 subunit sigma 1	AP1S1	0.724	4.08e-16	RGCs
ENSRNOG00000001416	VGF nerve growth factor inducible	VGF	0.975	1.2e-07
ENSRNOG00000001417	procollagen-lysine,2-oxoglutarate 5-dioxygenase 3	PLOD3	0.302	0.0015
ENSRNOG00000001418	zinc finger HIT-type containing 1	ZNHIT1	-0.015	0.928	Muller
ENSRNOG00000001419	claudin 15	CLDN15	0.447	0.0154
ENSRNOG00000001420	fission, mitochondrial 1	FIS1	0.083	0.423
ENSRNOG00000001424	cut like homeobox 1	CUX1	-0.066	0.579
ENSRNOG00000001425	SH2B adaptor protein 2	SH2B2	1.313	3.64e-06	Muller
ENSRNOG00000001426			-0.132	0.086
ENSRNOG00000001427	ORAI calcium release-activated calcium modulator 2	ORAI2	0.624	4.06e-10	RGCs
ENSRNOG00000001428	alkB homolog 4, lysine demethylase	ALKBH4	-0.486	0.0103
ENSRNOG00000001429	leucine-rich repeats and WD repeat domain containing 1	Lrwd1	-0.466	9.5e-05	Bipolar
ENSRNOG00000001430	RNA polymerase II subunit J	POLR2J	-0.05	0.819	Muller
ENSRNOG00000001431	RAS p21 protein activator 4	RASA4	0.974	2.97e-16	Bipolar
ENSRNOG00000001432	deltex E3 ubiquitin ligase 2	DTX2	0.005	0.984	Microglia
ENSRNOG00000001435	scavenger receptor cysteine rich family member with 4 domains	SSC4D	0.297	0.14	Muller
ENSRNOG00000001436	tyrosine 3-monooxygenase/tryptophan 5-monooxygenase activation protein gamma	YWHAG	0.427	2.77e-18	RGCs
ENSRNOG00000001439	serine/arginine repetitive matrix 3	Srrm3	0.041	0.686
ENSRNOG00000001440	malate dehydrogenase 2	MDH2	-0.197	0.0213
ENSRNOG00000001441	transmembrane protein 120A	TMEM120A	0.205	0.125
ENSRNOG00000001442	cytochrome p450 oxidoreductase	POR	0.665	4.64e-13	Muller
ENSRNOG00000001443	rhomboid domain containing 2	RHBDD2	-0.077	0.473	Muller
ENSRNOG00000001448	huntingtin interacting protein 1	HIP1	-0.5	5.09e-11
ENSRNOG00000001449	POM121 transmembrane nucleoporin	POM121/POM121C	-0.321	1.08e-05
ENSRNOG00000001450	NOP2/Sun RNA methyltransferase 5	NSUN5	-0.088	0.596	Microglia
ENSRNOG00000001452	frizzled class receptor 9	FZD9	0.568	0.113
ENSRNOG00000001453	bromodomain adjacent to zinc finger domain 1B	BAZ1B	-0.01	0.891
ENSRNOG00000001454	eukaryotic translation initiation factor 4H	EIF4H	-0.218	0.00168
ENSRNOG00000001455	kinesin family member 13A	KIF13A	0.345	7.27e-08
ENSRNOG00000001456	nucleoporin 153	NUP153	-0.304	6.29e-06
ENSRNOG00000001457	replication factor C subunit 2	RFC2	-0.628	6.73e-06	Microglia
ENSRNOG00000001465	iduronate 2-sulfatase	IDS	0.176	0.0158
ENSRNOG00000001469	elastin	ELN	-0.087	0.652	Muller
ENSRNOG00000001470	LIM domain kinase 1	LIMK1	0.42	2.77e-05
ENSRNOG00000001474	transmembrane protein 270	TMEM270	0.883	0.243
ENSRNOG00000001478	GTF2I repeat domain containing 1	GTF2IRD1	-0.755	1.39e-07
ENSRNOG00000001479	general transcription factor IIi	GTF2I	0.136	0.0568	Bipolar
ENSRNOG00000001480	neutrophil cytosolic factor 1	NCF1	1.577	4.49e-08	Microglia
ENSRNOG00000001482	GTF2I repeat domain containing 2	Gtf2ird2	0.355	0.00067
ENSRNOG00000001483	RCC1 like	RCC1L	-0.053	0.754
ENSRNOG00000001484			0.401	0.00691
ENSRNOG00000001488	proteasome 20S subunit beta 1	PSMB1	-0.202	0.0283	Bipolar
ENSRNOG00000001489	TATA-box binding protein	TBP	-0.281	0.0551
ENSRNOG00000001490	programmed cell death 2	PDCD2	-0.096	0.533
ENSRNOG00000001492	solute carrier family 8 member A2	SLC8A2	0.18	0.106	Bipolar
ENSRNOG00000001493			-0.071	0.523
ENSRNOG00000001494	NSF attachment protein alpha	NAPA	-0.449	7.93e-12	Bipolar
ENSRNOG00000001499	MIA SH3 domain containing	MIA	-0.387	0.619
ENSRNOG00000001500	RAB4B, member RAS oncogene family	RAB4B	-0.198	0.0465	RGCs
ENSRNOG00000001501	small nuclear ribonucleoprotein polypeptide A	SNRPA	-0.202	0.158	Microglia
ENSRNOG00000001506	transmembrane protein 35A	TMEM35A	0.115	0.29	Bipolar
ENSRNOG00000001514	cell division cycle associated 7	CDCA7	-0.095	0.81	Muller
ENSRNOG00000001515	mitogen-activated protein kinase kinase kinase 20	MAP3K20	0.603	0.000528	Vascular
ENSRNOG00000001516	Rap guanine nucleotide exchange factor 4	RAPGEF4	0.462	6.93e-05	Vascular
ENSRNOG00000001517	pyruvate dehydrogenase kinase 1	PDK1	-0.258	0.0671
ENSRNOG00000001518	integrin subunit alpha 6	ITGA6	1.038	4.11e-14	Amacrine
ENSRNOG00000001520	distal-less homeobox 1	DLX1	0.109	0.911
ENSRNOG00000001524	histone acetyltransferase 1	HAT1	-0.222	0.0177	Muller
ENSRNOG00000001525	immunoglobulin superfamily member 11	IGSF11	-0.543	5.13e-09
ENSRNOG00000001527	CD80 molecule	CD80	-0.177	0.757
ENSRNOG00000001528	growth associated protein 43	GAP43	0.377	9.84e-05
ENSRNOG00000001531			-0.252	0.249
ENSRNOG00000001544	cysteine and tyrosine rich 1	CYYR1	0.966	7.12e-05	Vascular
ENSRNOG00000001547	alkylglycerone phosphate synthase	AGPS	-0.288	0.00834	Microglia
ENSRNOG00000001548	NFE2 like bZIP transcription factor 2	NFE2L2	0.6	7.78e-06
ENSRNOG00000001551	ATP synthase peripheral stalk subunit F6	ATP5PF	0.274	0.00724
ENSRNOG00000001554	chromosome 21 open reading frame 91	C21orf91	-0.892	4.16e-17	Bipolar
ENSRNOG00000001555	BTG anti-proliferation factor 3	BTG3	-0.047	0.817
ENSRNOG00000001557	CXADR Ig-like cell adhesion molecule	CXADR	-0.599	1.47e-06
ENSRNOG00000001559	metaxin 2	MTX2	-0.252	0.0489
ENSRNOG00000001573	ubiquitin specific peptidase 25	USP25	-0.085	0.59
ENSRNOG00000001575	glutamate ionotropic receptor kainate type subunit 1	GRIK1	0.47	4.29e-07	Bipolar
ENSRNOG00000001582	BTB domain and CNC homolog 1	BACH1	-0.211	0.26
ENSRNOG00000001584	Map3k7 C-terminal like	Map3k7cl	0.003	0.996	Vascular
ENSRNOG00000001585	nuclear receptor interacting protein 1	NRIP1	-0.775	1.06e-28
ENSRNOG00000001592	chaperonin containing TCP1 subunit 8	CCT8	0.131	0.0461	RGCs
ENSRNOG00000001593	lunapark, ER junction formation factor	LNPK	-0.392	0.01
ENSRNOG00000001596	ATP synthase membrane subunit c locus 3	ATP5MC3	-0.068	0.441
ENSRNOG00000001597	activating transcription factor 2	ATF2	-0.004	0.976
ENSRNOG00000001598	ubiquitin specific peptidase 16	USP16	-0.42	5.15e-05	Bipolar
ENSRNOG00000001599	RWD domain containing 2B	RWDD2B	-0.175	0.214	Amacrine
ENSRNOG00000001602	listerin E3 ubiquitin protein ligase 1	LTN1	-0.417	4.08e-07	Muller
ENSRNOG00000001603	N-6 adenine-specific DNA methyltransferase 1	N6AMT1	-0.102	0.599
ENSRNOG00000001607	ADAM metallopeptidase with thrombospondin type 1 motif 1	ADAMTS1	1.292	9.34e-09
ENSRNOG00000001608	neurexophilin and PC-esterase domain family member 3	NXPE3	0.713	2.07e-07	Horizontal
ENSRNOG00000001609	centrosomal protein 97	CEP97	-0.217	0.167	Muller
ENSRNOG00000001611	ribosomal protein L24	RPL24	-0.236	0.0146
ENSRNOG00000001613	zinc finger and BTB domain containing 11	ZBTB11	-0.137	0.153	Amacrine
ENSRNOG00000001616	SUMO specific peptidase 7	SENP7	-1.013	2.53e-51
ENSRNOG00000001618	receptor interacting serine/threonine kinase 4	RIPK4	-1.023	0.00106	Rods
ENSRNOG00000001620	PR/SET domain 15	PRDM15	-0.125	0.386
ENSRNOG00000001621	C2 calcium dependent domain containing 2	C2CD2	-0.47	0.000848	Vascular
ENSRNOG00000001622	interphotoreceptor matrix proteoglycan 2	IMPG2	-1.549	8.37e-100
ENSRNOG00000001623	zinc finger and BTB domain containing 21	Zbtb21	-0.017	0.894
ENSRNOG00000001627	ABI family member 3 binding protein	Abi3bp	-0.465	0.62	Muller
ENSRNOG00000001628	Purkinje cell protein 4	PCP4	0.188	0.0902
ENSRNOG00000001629	guided entry of tail-anchored proteins factor 1	GET1	-0.292	9.61e-05
ENSRNOG00000001632	bromodomain and WD repeat domain containing 1	BRWD1	-0.51	1.29e-11
ENSRNOG00000001633	trafficking from ER to golgi regulator	TFG	-0.036	0.797
ENSRNOG00000001640	translocase of outer mitochondrial membrane 70	TOMM70	-0.229	0.00206
ENSRNOG00000001642	TBC1 domain family member 23	TBC1D23	-0.344	0.000949
ENSRNOG00000001643	proteasome assembly chaperone 1	PSMG1	0.118	0.324	Vascular
ENSRNOG00000001644	transmembrane protein 30C	Tmem30c	-0.113	0.903
ENSRNOG00000001645	filamin A interacting protein 1 like	FILIP1L	0.357	0.0197
ENSRNOG00000001647	ETS proto-oncogene 2, transcription factor	ETS2	1.122	1.78e-17
ENSRNOG00000001652	ETS transcription factor ERG	ERG	1.29	0.000752	Vascular
ENSRNOG00000001653	ST3 beta-galactoside alpha-2,3-sialyltransferase 6	ST3GAL6	0.936	0.000322
ENSRNOG00000001654	coproporphyrinogen oxidase	CPOX	-0.688	1.76e-13	Muller
ENSRNOG00000001657	claudin domain containing 1	CLDND1	-0.256	0.0359	Muller
ENSRNOG00000001658	potassium inwardly rectifying channel subfamily J member 6	KCNJ6	0.289	0.0947
ENSRNOG00000001662	dual specificity tyrosine phosphorylation regulated kinase 1A	DYRK1A	-0.189	0.0125
ENSRNOG00000001679	gamma-aminobutyric acid type A receptor subunit rho3	GABRR3	-0.016	0.939	Bipolar
ENSRNOG00000001680	ribosomal oxygenase 2	RIOX2	0.164	0.436
ENSRNOG00000001681	VPS26 endosomal protein sorting factor C	VPS26C	-0.69	5.82e-11
ENSRNOG00000001682	tetratricopeptide repeat domain 3	TTC3	0.076	0.104
ENSRNOG00000001684	ripply transcriptional repressor 3	RIPPLY3	-0.865	0.0745
ENSRNOG00000001686	holocarboxylase synthetase	HLCS	0.171	0.38	RGCs
ENSRNOG00000001687			-0.312	0.0262
ENSRNOG00000001689	ADP ribosylation factor like GTPase 6	ARL6	-1.409	1.08e-37	Rods
ENSRNOG00000001692	chromatin assembly factor 1 subunit B	CHAF1B	-0.125	0.804
ENSRNOG00000001699	SET domain containing 4	SETD4	-0.121	0.365
ENSRNOG00000001700	whirlin	WHRN	-0.895	1.32e-28
ENSRNOG00000001701	carbonyl reductase 3	CBR3	1.244	0.0964	RGCs
ENSRNOG00000001704	RUNX family transcription factor 1	RUNX1	0.988	0.0808	Microglia
ENSRNOG00000001706	kalirin RhoGEF kinase	KALRN	0.101	0.324
ENSRNOG00000001707	von Willebrand factor A domain containing 5B2	VWA5B2	0.455	5.24e-06
ENSRNOG00000001708	dishevelled segment polarity protein 3	DVL3	-0.223	0.000771	Muller
ENSRNOG00000001709	adaptor related protein complex 2 subunit mu 1	AP2M1	0.107	0.207	Amacrine
ENSRNOG00000001710	ATP binding cassette subfamily F member 3	ABCF3	-0.117	0.202	Bipolar
ENSRNOG00000001711	phospholipase A and acyltransferase 1	PLAAT1	-0.296	0.698
ENSRNOG00000001712	ALG3 alpha-1,3- mannosyltransferase	ALG3	-0.015	0.936
ENSRNOG00000001715	endothelin converting enzyme 2	ECE2	0.412	0.000205
ENSRNOG00000001717	OPA1 mitochondrial dynamin like GTPase	OPA1	-0.188	0.0171	Bipolar
ENSRNOG00000001719	proteasome 26S subunit ubiquitin receptor, non-ATPase 2	PSMD2	0.003	0.974	RGCs
ENSRNOG00000001720	hes family bHLH transcription factor 1	HES1	-0.167	0.759
ENSRNOG00000001724			-0.555	0.0189
ENSRNOG00000001726	transmembrane protein 44	TMEM44	0.299	0.224	Vascular
ENSRNOG00000001727	large 60S subunit nuclear export GTPase 1	LSG1	-0.265	0.0244
ENSRNOG00000001728	family with sequence similarity 43 member A	FAM43A	0.683	0.000447	RGCs
ENSRNOG00000001729	xyloside xylosyltransferase 1	XXYLT1	0.058	0.808
ENSRNOG00000001730	ArfGAP with coiled-coil, ankyrin repeat and PH domains 2	ACAP2	-0.118	0.161
ENSRNOG00000001733	protein phosphatase 1 regulatory inhibitor subunit 2	PPP1R2	0.414	5.33e-08	Microglia
ENSRNOG00000001736	3-hydroxybutyrate dehydrogenase 1	BDH1	-0.606	1.75e-07
ENSRNOG00000001738	eukaryotic translation initiation factor 4 gamma 1	EIF4G1	0.061	0.526
ENSRNOG00000001747	p21 (RAC1) activated kinase 2	PAK2	-0.119	0.576
ENSRNOG00000001750	chordin	CHRD	1.071	1.22e-07
ENSRNOG00000001752	negative regulator of reactive oxygen species	NRROS	0.64	0.0809	Microglia
ENSRNOG00000001754	WD repeat domain 53	WDR53	-0.044	0.869
ENSRNOG00000001757	transmembrane 4 L six family member 19	TM4SF19	0.075	0.896
ENSRNOG00000001758	dynein light chain Tctex-type 2B	DYNLT2B	-0.48	0.000809
ENSRNOG00000001762	phosphate cytidylyltransferase 1A, choline	PCYT1A	0.054	0.549
ENSRNOG00000001764	VPS8 subunit of CORVET complex	VPS8	-0.021	0.852
ENSRNOG00000001766	transferrin receptor	TFRC	-0.257	0.0017
ENSRNOG00000001767			0.618	8.11e-08
ENSRNOG00000001769	tyrosine kinase non receptor 2	TNK2	0.062	0.615
ENSRNOG00000001770	enoyl-CoA hydratase and 3-hydroxyacyl CoA dehydrogenase	EHHADH	0.372	0.325
ENSRNOG00000001773	SUMO specific peptidase 2	SENP2	-0.171	0.0621
ENSRNOG00000001774	leucine rich repeats and calponin homology domain containing 3	LRCH3	-0.329	4.06e-06
ENSRNOG00000001777			0.805	0.447
ENSRNOG00000001781	leishmanolysin like peptidase	LMLN	-0.958	4.35e-24	RGCs
ENSRNOG00000001782	oxysterol binding protein like 11	OSBPL11	-0.147	0.225	Microglia
ENSRNOG00000001783	transformer 2 beta homolog	TRA2B	-0.399	5.11e-07
ENSRNOG00000001785	ETS variant transcription factor 5	ETV5	1.068	4.42e-32	Muller
ENSRNOG00000001786	sorting nexin 4	SNX4	-0.123	0.234
ENSRNOG00000001789	zinc finger protein 148	ZNF148	-0.318	0.00024
ENSRNOG00000001792	solute carrier family 12 member 8	SLC12A8	1.226	0.207
ENSRNOG00000001793	heart development protein with EGF like domains 1	HEG1	-0.7	4.25e-09
ENSRNOG00000001795	integrin subunit beta 5	ITGB5	0.58	8.86e-05
ENSRNOG00000001796	diacylglycerol kinase gamma	DGKG	-0.144	0.723	Muller
ENSRNOG00000001797	uridine monophosphate synthetase	UMPS	0.051	0.763
ENSRNOG00000001803	DnaJ heat shock protein family (Hsp40) member B11	DNAJB11	-0.143	0.111
ENSRNOG00000001804	inositol 1,4,5-trisphosphate receptor type 2	ITPR2	0.725	0.00482
ENSRNOG00000001807	sarcospan	SSPN	0.502	0.361	Muller
ENSRNOG00000001808	integrator complex subunit 13	INTS13	-0.278	0.00238
ENSRNOG00000001811	FGFR1 oncogene partner 2	FGFR1OP2	-0.029	0.788
ENSRNOG00000001813	dynamin 1 like	DNM1L	-0.292	0.000146	RGCs
ENSRNOG00000001815	eukaryotic translation initiation factor 4A2	EIF4A2	0.194	0.000299
ENSRNOG00000001816	replication factor C subunit 4	RFC4	-0.593	1.71e-05	Bipolar
ENSRNOG00000001817	transmembrane 7 superfamily member 3	TM7SF3	0.572	2.52e-10
ENSRNOG00000001820	mediator complex subunit 21	MED21	-0.19	0.303
ENSRNOG00000001823	ST6 beta-galactoside alpha-2,6-sialyltransferase 1	ST6GAL1	0.396	0.108	Vascular
ENSRNOG00000001825	plakophilin 2	PKP2	-1.751	2.91e-94	Muller
ENSRNOG00000001827	mannan-binding lectin serine peptidase 1	Masp1	-1.142	0.0941
ENSRNOG00000001828	serine/threonine kinase 38 like	STK38L	-0.216	0.00941	Microglia
ENSRNOG00000001829	ubiquitin conjugating enzyme E2 V2	UBE2V2	0.124	0.283
ENSRNOG00000001830	basic helix-loop-helix ARNT like 2	BMAL2	1.58	0.0276	Microglia
ENSRNOG00000001833	minichromosome maintenance complex component 4	MCM4	0.188	0.0788
ENSRNOG00000001834			0.83	1.49e-12
ENSRNOG00000001837	somatostatin	SST	0.977	6.34e-07
ENSRNOG00000001842	mitochondrial ribosomal protein S35	MRPS35	-0.055	0.769	Amacrine
ENSRNOG00000001843	BCL6 transcription repressor	BCL6	0.356	0.00213	Muller
ENSRNOG00000001844	kelch like family member 42	KLHL42	0.081	0.613	Amacrine
ENSRNOG00000001845	DNA topoisomerase III beta	TOP3B	0.066	0.507	Amacrine
ENSRNOG00000001847	coiled-coil domain containing 91	CCDC91	0.42	2.88e-05	Bipolar
ENSRNOG00000001849	mitogen-activated protein kinase 1	MAPK1	-0.347	5.23e-05
ENSRNOG00000001851	fatty acyl-CoA reductase 2	FAR2	-0.175	0.263
ENSRNOG00000001852	ERGIC and golgi 2	Ergic2	-0.052	0.7
ENSRNOG00000001854	transmembrane O-mannosyltransferase targeting cadherins 1	TMTC1	0.726	7.28e-07
ENSRNOG00000001858			-0.871	3.74e-05
ENSRNOG00000001859	stromal cell derived factor 2 like 1	SDF2L1	1.16	1.02e-10	Microglia
ENSRNOG00000001861	YdjC chitooligosaccharide deacetylase homolog	YDJC	0.728	0.0011	Amacrine
ENSRNOG00000001862	ubiquitin-conjugating enzyme E2L 3	Ube2l3	0.176	0.0134
ENSRNOG00000001864	transmembrane protein 191	Tmem191	0.281	0.117
ENSRNOG00000001865	serpin family D member 1	SERPIND1	0.064	0.945
ENSRNOG00000001867	synaptosome associated protein 29	SNAP29	-0.389	3.66e-05
ENSRNOG00000001868	CRK like proto-oncogene, adaptor protein	CRKL	0.115	0.416	Muller
ENSRNOG00000001870	leucine zipper like post translational regulator 1	LZTR1	0.063	0.472	Amacrine
ENSRNOG00000001873	purinergic receptor P2X 6	P2RX6	0.153	0.642	RGCs
ENSRNOG00000001874	solute carrier family 7 member 4	SLC7A4	0.293	0.115	Muller
ENSRNOG00000001875	sphingomyelin phosphodiesterase 4	SMPD4	-0.109	0.308
ENSRNOG00000001876	coiled-coil domain containing 74A	Ccdc74a	0.164	0.876	Muller
ENSRNOG00000001877	mediator complex subunit 15	MED15	-0.073	0.486	Bipolar
ENSRNOG00000001878	kelch like family member 22	KLHL22	-0.018	0.872
ENSRNOG00000001880	DiGeorge syndrome critical region gene 6	Dgcr6	0.36	0.00234
ENSRNOG00000001884	RAN binding protein 1	RANBP1	0.194	0.0147
ENSRNOG00000001885	tRNA methyltransferase 2 homolog A	TRMT2A	-0.048	0.763
ENSRNOG00000001886	DGCR8 microprocessor complex subunit	DGCR8	-0.293	0.000939	Rods
ENSRNOG00000001888	ARVCF delta catenin family member	ARVCF	-0.254	0.116	Muller
ENSRNOG00000001889	catechol-O-methyltransferase	COMT	0.134	0.423	Muller
ENSRNOG00000001890	thioredoxin reductase 2	TXNRD2	0.275	0.0798
ENSRNOG00000001891	G protein subunit beta 1 like	GNB1L	-0.128	0.518	Bipolar
ENSRNOG00000001892	T-box transcription factor 1	TBX1	2.914	0.000417	Vascular
ENSRNOG00000001893	serine/threonine-protein phosphatase 2A catalytic subunit alpha-like	LOC100362453	0.462	0.328
ENSRNOG00000001908	kelch like family member 6	KLHL6	-0.051	0.902	Microglia
ENSRNOG00000001911	MAP6 domain containing 1	MAP6D1	0.659	4.21e-05	RGCs
ENSRNOG00000001915	chondrolectin	CHODL	-0.416	0.117
ENSRNOG00000001926	claudin 1	CLDN1	-1.444	0.187	Muller
ENSRNOG00000001928	interleukin 1 receptor accessory protein	IL1RAP	0.609	0.000238	Vascular
ENSRNOG00000001930	coiled-coil domain containing 50	Ccdc50	-0.241	0.0395
ENSRNOG00000001931	fibroblast growth factor 12	FGF12	0.669	3.69e-12
ENSRNOG00000001953	beta-secretase 2	BACE2	0.036	0.971	Vascular
ENSRNOG00000001956	DAZ interacting zinc finger protein 3	DZIP3	-0.087	0.44
ENSRNOG00000001958	intraflagellar transport 57	IFT57	-0.132	0.296
ENSRNOG00000001959	MX dynamin-like GTPase 2	Mx2	2.655	5.5e-08	Microglia
ENSRNOG00000001960	sulfotransferase family 1D, member 1	Sult1d1	0.218	0.488
ENSRNOG00000001963	MX dynamin like GTPase 1	MX1	2.022	0.000264
ENSRNOG00000001964	CD47 molecule	CD47	0.664	2.87e-09
ENSRNOG00000001971	BBX high mobility group box domain containing	BBX	0.172	0.322
ENSRNOG00000001976	transmembrane serine protease 2	TMPRSS2	2.739	0.00444
ENSRNOG00000001979	regulator of calcineurin 1	Rcan1	0.256	0.023
ENSRNOG00000001982	Cbl proto-oncogene B	CBLB	-0.017	0.894
ENSRNOG00000001989	activated leukocyte cell adhesion molecule	ALCAM	0.586	8.98e-09
ENSRNOG00000001990	UDP glucuronosyltransferase family 2 member B17	UGT2B17	-0.385	0.583
ENSRNOG00000001991	ATP synthase peripheral stalk subunit OSCP	ATP5PO	-0.129	0.239
ENSRNOG00000001992	ATPase H+ transporting V1 subunit A	ATP6V1A	0.129	0.0139
ENSRNOG00000001996	YTH N6-methyladenosine RNA binding protein C1	YTHDC1	-0.245	0.00105	Bipolar
ENSRNOG00000002001	intersectin 1	ITSN1	0.222	0.00759
ENSRNOG00000002004	PR/SET domain 8	PRDM8	0.687	3.26e-11	Bipolar
ENSRNOG00000002012	DNA replication fork stabilization factor DONSON	DONSON	-0.253	0.0883
ENSRNOG00000002013	SID1 transmembrane family member 1	SIDT1	0.301	0.137	Microglia
ENSRNOG00000002014	signal transducing adaptor family member 1	STAP1	0.621	0.432
ENSRNOG00000002021	SON DNA and RNA binding protein	SON	-0.494	3.78e-19
ENSRNOG00000002024	EPH receptor A5	EPHA5	0.428	2.25e-09
ENSRNOG00000002026	DnaJ heat shock protein family (Hsp40) member C28	DNAJC28	-0.223	0.283	Microglia
ENSRNOG00000002028	transmembrane protein 50B	TMEM50B	0.148	0.0644	Cones
ENSRNOG00000002031	N-alpha-acetyltransferase 11, NatA catalytic subunit	NAA11	0.568	0.669
ENSRNOG00000002032	interferon gamma receptor 2	IFNGR2	0.34	0.024	Microglia
ENSRNOG00000002035	progestin and adipoQ receptor family member 3	PAQR3	0.458	0.00014
ENSRNOG00000002036	PAX3 and PAX7 binding protein 1	PAXBP1	-0.386	2e-07
ENSRNOG00000002039	ecotropic viral integration site 5	EVI5	0.069	0.42	Bipolar
ENSRNOG00000002040	BMP2 inducible kinase	BMP2K	0.108	0.418
ENSRNOG00000002041	BOC cell adhesion associated, oncogene regulated	BOC	0.299	0.451	Muller
ENSRNOG00000002044	GTP binding protein 8 (putative)	GTPBP8	-0.438	0.00389	Bipolar
ENSRNOG00000002045	annexin A3	ANXA3	1.76	5.31e-41	Vascular
ENSRNOG00000002050	insulin like growth factor binding protein 7	IGFBP7	0.354	0.705
ENSRNOG00000002051	synaptojanin 1	SYNJ1	-0.746	2.61e-51	Amacrine
ENSRNOG00000002052	coiled-coil domain containing 80	CCDC80	-0.857	0.282	Muller
ENSRNOG00000002053	Fraser extracellular matrix complex subunit 1	FRAS1	0.247	0.158	Bipolar
ENSRNOG00000002054	glomulin, FKBP associated protein	GLMN	-0.874	7.48e-17	Rods
ENSRNOG00000002055	nitric oxide associated 1	NOA1	-0.073	0.611
ENSRNOG00000002057	solute carrier family 10 member 6	SLC10A6	1.295	0.00951
ENSRNOG00000002061	protein tyrosine phosphatase non-receptor type 13	PTPN13	0.588	3.66e-08	Rods
ENSRNOG00000002069	solute carrier family 35 member A5	SLC35A5	0.058	0.619	Muller
ENSRNOG00000002072	eva-1 homolog C	EVA1C	1.909	0.00175
ENSRNOG00000002073	bromodomain testis associated	BRDT	-0.421	0.0772	Amacrine
ENSRNOG00000002074	RE1 silencing transcription factor	REST	0.573	0.000171
ENSRNOG00000002075	CCR4-NOT transcription complex subunit 6 like	CNOT6L	-0.305	0.0181
ENSRNOG00000002079	mitogen-activated protein kinase 10	MAPK10	0.506	3e-11
ENSRNOG00000002080	URB1 ribosome biogenesis homolog	URB1	-0.05	0.628
ENSRNOG00000002089	cyclin G2	CCNG2	0.288	0.00615
ENSRNOG00000002091	general transcription factor IIIC subunit 3	GTF3C3	-0.344	0.00607
ENSRNOG00000002092	hormonally up-regulated Neu-associated kinase	HUNK	0.539	0.00024	Muller
ENSRNOG00000002093	transforming growth factor beta receptor 3	TGFBR3	1.351	1.8e-10	Vascular
ENSRNOG00000002094	autophagy related 3	ATG3	0.153	0.0909	Vascular
ENSRNOG00000002097	RAS like family 11 member B	RASL11B	0.493	0.0527	Bipolar
ENSRNOG00000002100	signal recognition particle 72	SRP72	0.074	0.379
ENSRNOG00000002101	phosphoribosylaminoimidazole carboxylase and phosphoribosylaminoimidazolesuccinocarboxamide synthase	PAICS	0.259	0.0216
ENSRNOG00000002104	SR-related CTD associated factor 4	SCAF4	-0.05	0.653
ENSRNOG00000002105	cell division cycle 7	CDC7	0.451	0.0104	Rods
ENSRNOG00000002106	ubiquitin specific peptidase 46	USP46	0.428	6.04e-11
ENSRNOG00000002112	zinc finger protein 644	ZNF644	-0.213	0.00519
ENSRNOG00000002115	superoxide dismutase 1	SOD1	0.475	1.42e-10
ENSRNOG00000002117	BarH like homeobox 2	BARHL2	0.537	6.09e-06
ENSRNOG00000002121	leucine rich repeat containing 8 VRAC subunit D	LRRC8D	-0.688	6.25e-12
ENSRNOG00000002122			0.734	0.000116
ENSRNOG00000002125	cyclin I	CCNI	-0.056	0.533	Amacrine
ENSRNOG00000002126	neural cell adhesion molecule 2	NCAM2	0.112	0.26
ENSRNOG00000002127			1.229	0.0794
ENSRNOG00000002128	phosphoribosyl pyrophosphate amidotransferase	PPAT	0.155	0.193
ENSRNOG00000002129	leucine rich repeat containing 8 VRAC subunit B	LRRC8B	-1.061	1.79e-38
ENSRNOG00000002130			4.187	0.00422
ENSRNOG00000002134			2.689	8.04e-05
ENSRNOG00000002135	sarcoglycan beta	SGCB	-0.195	0.00635	Bipolar
ENSRNOG00000002137	aminoadipate-semialdehyde dehydrogenase	AASDH	-0.402	6.97e-06	Bipolar
ENSRNOG00000002139	capping protein inhibiting regulator of actin	Cracd	-0.111	0.0892
ENSRNOG00000002141	CD200 molecule	CD200	0.663	1.28e-16
ENSRNOG00000002142	CDP-diacylglycerol synthase 1	CDS1	-2.151	2.94e-164
ENSRNOG00000002144	exocyst complex component 1	Exoc1	-0.18	0.0377	Bipolar
ENSRNOG00000002145	transmembrane serine protease 7	TMPRSS7	0.693	0.132
ENSRNOG00000002146	polycystin 2, transient receptor potential cation channel	PKD2	0.632	4.75e-09	Muller
ENSRNOG00000002149	NK6 homeobox 1	NKX6-1	-1.2	0.249
ENSRNOG00000002152	defective in cullin neddylation 1 domain containing 4	DCUN1D4	0.187	0.0544
ENSRNOG00000002153	centrosomal protein 135	CEP135	-0.937	2.65e-13	Bipolar
ENSRNOG00000002159	glycerol-3-phosphate acyltransferase 3	GPAT3	0.628	0.0598	Cones
ENSRNOG00000002161	toll like receptor 6	TLR6	1.441	0.00912	Microglia
ENSRNOG00000002163	KLF transcription factor 3	KLF3	0.587	1.37e-06
ENSRNOG00000002164	neuromedin U	NMU	-0.062	0.912	Muller
ENSRNOG00000002165	abraxas 1, BRCA1 A complex subunit	ABRAXAS1	-0.572	0.000778
ENSRNOG00000002167	dentin matrix acidic phosphoprotein 1	DMP1	1.51	0.174
ENSRNOG00000002169	phosducin like 2	PDCL2	-1.23	0.00062
ENSRNOG00000002171	pleckstrin homology like domain family B member 2	PHLDB2	0.367	0.286	Vascular
ENSRNOG00000002175	clock circadian regulator	CLOCK	-0.272	8.33e-07	Bipolar
ENSRNOG00000002176	nectin cell adhesion molecule 3	NECTIN3	0.019	0.961
ENSRNOG00000002177	glucosamine-6-phosphate deaminase 2	GNPDA2	-0.165	0.271
ENSRNOG00000002178	mitochondrial ribosomal protein S18C	MRPS18C	-0.094	0.657
ENSRNOG00000002180	TBC1 domain family member 1	TBC1D1	0.587	1.57e-06
ENSRNOG00000002181	helicase, POLQ like	HELQ	-0.033	0.862
ENSRNOG00000002182	septin 11	SEPTIN11	0.468	4.62e-07
ENSRNOG00000002185	phosphoglucomutase 2	Pgm2	0.495	5.97e-05	Muller
ENSRNOG00000002186	nudix hydrolase 9	NUDT9	0.11	0.326
ENSRNOG00000002188	heparanase	HPSE	0.372	0.457	Microglia
ENSRNOG00000002191	chromosome 4 open reading frame 19	C4orf19	0.655	0.0384	Muller
ENSRNOG00000002192	RELT like 1	RELL1	-1.187	2.08e-12
ENSRNOG00000002194	coenzyme Q2, polyprenyltransferase	COQ2	-0.244	0.0472
ENSRNOG00000002196	OCIA domain containing 2	OCIAD2	0.298	0.307	Rods
ENSRNOG00000002199	transmembrane protein 165	TMEM165	-0.01	0.96	Muller
ENSRNOG00000002202	sosondowah ankyrin repeat domain family member B	SOWAHB	1.402	5.23e-14	Muller
ENSRNOG00000002203	lin-54 DREAM MuvB core complex component	LIN54	-0.505	4.78e-05	Bipolar
ENSRNOG00000002204	coiled-coil domain containing 158	CCDC158	-0.19	0.545	Muller
ENSRNOG00000002205	OCIA domain containing 1	OCIAD1	0.128	0.167
ENSRNOG00000002207	GTP binding elongation factor GUF1	GUF1	-0.185	0.0914
ENSRNOG00000002208	shroom family member 3	SHROOM3	-1.17	1.21e-33	Bipolar
ENSRNOG00000002210	hydroxysteroid 17-beta dehydrogenase 11	HSD17B11	-0.501	1.09e-09	Microglia
ENSRNOG00000002212	hydroxysteroid 17-beta dehydrogenase 13	HSD17B13	-0.495	0.0619
ENSRNOG00000002214	kelch like family member 8	KLHL8	0.502	9.14e-11	Muller
ENSRNOG00000002215	myosin light chain kinase	MYLK	0.433	0.0291	Rods
ENSRNOG00000002216	steroid 5 alpha-reductase 3	SRD5A3	0.083	0.759	Muller
ENSRNOG00000002217	placenta associated 8	PLAC8	2.386	8.13e-06
ENSRNOG00000002218	starch binding domain 1	STBD1	1.331	0.00269
ENSRNOG00000002225	scavenger receptor class B member 2	SCARB2	0.2	0.0161	Bipolar
ENSRNOG00000002227	KIT proto-oncogene, receptor tyrosine kinase	KIT	0.786	1.35e-11
ENSRNOG00000002229	adenylate cyclase 5	ADCY5	0.402	3.85e-06
ENSRNOG00000002232	ALF transcription elongation factor 1	AFF1	0.388	4.03e-08	Muller
ENSRNOG00000002238	semaphorin 5B	SEMA5B	-0.401	0.00915	Muller
ENSRNOG00000002240	solute carrier family 49 member 4	SLC49A4	0.262	0.0197
ENSRNOG00000002241	HSPB1 associated protein 1	HSPBAP1	0.23	0.2	Cones
ENSRNOG00000002244	platelet derived growth factor receptor alpha	PDGFRA	0.285	0.638	Muller
ENSRNOG00000002246	solute carrier family 30 member 9	SLC30A9	-0.091	0.226
ENSRNOG00000002247	nucleoporin 54	NUP54	-0.18	0.0987
ENSRNOG00000002248	FRY like transcription coactivator	FRYL	-0.748	6.28e-19	Rods
ENSRNOG00000002251	SEC31 homolog A, COPII coat complex component	SEC31A	0.009	0.933	Bipolar
ENSRNOG00000002253	WD repeat domain 5B	WDR5B	-0.779	4.64e-05	Muller
ENSRNOG00000002254	transmembrane protein 33	TMEM33	0.193	0.0796
ENSRNOG00000002255	family with sequence similarity 162 member A	FAM162A	-0.231	0.0555
ENSRNOG00000002256	ADP-ribosyltransferase 3 (inactive)	ART3	0.157	0.586	Vascular
ENSRNOG00000002258	transmembrane protein 150C	TMEM150C	0.012	0.908
ENSRNOG00000002262	enolase-phosphatase 1	ENOPH1	0.197	0.0525	Muller
ENSRNOG00000002266	GS homeobox 2	GSX2	-0.069	0.976
ENSRNOG00000002267	cysteine rich hydrophobic domain 2	CHIC2	-0.069	0.678	Muller
ENSRNOG00000002270	heterogeneous nuclear ribonucleoprotein D-like	Hnrnpdl	0.151	0.047	Amacrine
ENSRNOG00000002271	SLAIN motif family member 2	SLAIN2	0.011	0.922
ENSRNOG00000002272	ligand of numb-protein X 1	LNX1	-0.021	0.842	RGCs
ENSRNOG00000002273	N-acylethanolamine acid amidase	NAAA	-0.461	0.000422	Rods
ENSRNOG00000002275	factor interacting with PAPOLA and CPSF1	FIP1L1	-0.271	0.000215
ENSRNOG00000002276	PHD finger protein 6	PHF6	-0.206	0.29	Muller
ENSRNOG00000002278	tec protein tyrosine kinase	TEC	1.007	0.000509
ENSRNOG00000002280			0.793	2.18e-09
ENSRNOG00000002291	bromodomain and WD repeat domain containing 3	BRWD3	-0.823	8.38e-12
ENSRNOG00000002292	heterogeneous nuclear ribonucleoprotein D	HNRNPD	0.217	0.00134
ENSRNOG00000002294	sorting nexin 29	SNX29	-0.479	3.01e-06
ENSRNOG00000002301	USO1 vesicle transport factor	USO1	0.023	0.779	Vascular
ENSRNOG00000002303	potassium inwardly rectifying channel subfamily J member 12	KCNJ12	0.086	0.826
ENSRNOG00000002305	solute carrier family 15 member 2	SLC15A2	-0.46	0.431	Muller
ENSRNOG00000002309	H2.0 like homeobox	HLX	1.989	0.00615	Microglia
ENSRNOG00000002312	ATPase phospholipid transporting 10D (putative)	ATP10D	0.276	0.443	Vascular
ENSRNOG00000002314			-1.062	0.18
ENSRNOG00000002318	LIM and calponin homology domains 1	LIMCH1	0.124	0.14	Muller
ENSRNOG00000002319	translin	TSN	0.104	0.161	Muller
ENSRNOG00000002320	COMM domain containing 8	COMMD8	0.103	0.407
ENSRNOG00000002322	chromosome 1 open reading frame 115	C1orf115	0.043	0.908
ENSRNOG00000002323	charged multivesicular body protein 1B2	Chmp1b2	0.163	0.357
ENSRNOG00000002327	gamma-aminobutyric acid type A receptor subunit beta1	GABRB1	0.688	0.0275	Muller
ENSRNOG00000002331	aldehyde dehydrogenase 3 family member A1	ALDH3A1	0.73	0.197	Muller
ENSRNOG00000002332	motile sperm domain containing 1	MOSPD1	-0.073	0.833
ENSRNOG00000002336	gamma-aminobutyric acid type A receptor subunit alpha4	GABRA4	0.113	0.464	Muller
ENSRNOG00000002338	diacylglycerol kinase epsilon	Dgke	-1.122	1.21e-47	Bipolar
ENSRNOG00000002339	microtubule affinity regulating kinase 1	MARK1	0.129	0.26
ENSRNOG00000002341	tripartite motif containing 25	TRIM25	1.047	2.09e-06	Vascular
ENSRNOG00000002342	aldehyde dehydrogenase 3 family member A2	ALDH3A2	-0.062	0.478	Muller
ENSRNOG00000002343	ubiquitin C-terminal hydrolase L1	UCHL1	0.486	1.45e-12	RGCs
ENSRNOG00000002345	RasGEF domain family member 1B	RASGEF1B	0.571	1.68e-07
ENSRNOG00000002347	ral guanine nucleotide dissociation stimulator like 1	RGL1	0.718	1.57e-17
ENSRNOG00000002349	gamma-aminobutyric acid type A receptor subunit alpha2	GABRA2	0.094	0.466	Amacrine
ENSRNOG00000002352	tRNA splicing endonuclease subunit 15	Tsen15	0.314	0.0782
ENSRNOG00000002353	RAB3 GTPase activating non-catalytic protein subunit 2	RAB3GAP2	-0.232	0.000782	Muller
ENSRNOG00000002358	serine carboxypeptidase 1	SCPEP1	-0.408	0.0243	Microglia
ENSRNOG00000002360	gamma-aminobutyric acid type A receptor subunit gamma1	GABRG1	0.174	0.541	Muller
ENSRNOG00000002361	protein kinase cGMP-dependent 2	PRKG2	0.362	0.295
ENSRNOG00000002364	ring finger protein 112	RNF112	0.346	0.00268	Muller
ENSRNOG00000002365	integral membrane protein 2A	ITM2A	-0.046	0.801
ENSRNOG00000002368	isoleucyl-tRNA synthetase 2, mitochondrial	IARS2	-0.04	0.753	Muller
ENSRNOG00000002369	regulator of G protein signaling 8	RGS8	0.464	3.88e-11	Bipolar
ENSRNOG00000002372	sarcoglycan delta	SGCD	0.997	0.28
ENSRNOG00000002373	A-kinase anchoring protein 1	AKAP1	-1.045	4.28e-44	Rods
ENSRNOG00000002376	cytoplasmic linker associated protein 1	CLASP1	-0.155	0.0216	Horizontal
ENSRNOG00000002378	3'(2'), 5'-bisphosphate nucleotidase 1	BPNT1	-0.048	0.59	Bipolar
ENSRNOG00000002381	bone morphogenetic protein 3	BMP3	-0.251	0.505	Bipolar
ENSRNOG00000002385	proteoglycan 4	PRG4	0.055	0.947
ENSRNOG00000002387	transcription elongation factor A like 1	TCEAL1	0.233	0.0694
ENSRNOG00000002388	tripartite motif containing 41	TRIM41	0.163	0.0301
ENSRNOG00000002389	mortality factor 4 like 2	MORF4L2	0.001	0.988
ENSRNOG00000002391	glycine receptor alpha 4 (pseudogene)	GLRA4	0.038	0.926
ENSRNOG00000002393	glutamyl-prolyl-tRNA synthetase 1	EPRS1	-0.354	2.14e-10
ENSRNOG00000002394	translocated promoter region, nuclear basket protein	TPR	-0.458	2.74e-19
ENSRNOG00000002397	solute carrier family 30 member 10	SLC30A10	0.4	0.000107	Vascular
ENSRNOG00000002403	niban apoptosis regulator 1	NIBAN1	-0.316
ENSRNOG00000002407	pyridoxal dependent decarboxylase domain containing 1	PDXDC1	-0.266	0.0259	Amacrine
ENSRNOG00000002408	RNA binding motif protein 47	RBM47	0.454	0.587	Microglia
ENSRNOG00000002413	glypican 4	GPC4	0.309	0.414
ENSRNOG00000002414	transcription factor CP2 like 1	TFCP2L1	0.203	0.682	Muller
ENSRNOG00000002418	transforming growth factor beta 2	TGFB2	0.619	2.63e-07	Muller
ENSRNOG00000002419	proteolipid protein 1	PLP1	-0.326	0.0422	Muller
ENSRNOG00000002420	zinc finger CCCH-type containing 7A	ZC3H7A	-0.251	0.0013	Horizontal
ENSRNOG00000002423	family with sequence similarity 114, member A2	Fam114a2	-0.182	0.064	Muller
ENSRNOG00000002425	phosphatidylcholine transfer protein	PCTP	1.048	0.000235	Microglia
ENSRNOG00000002428	lysophosphatidic acid receptor 4	LPAR4	-0.151	0.84	Muller
ENSRNOG00000002433	G3BP stress granule assembly factor 2	G3bp2	0.098	0.323
ENSRNOG00000002434	transmembrane protein 100	TMEM100	1.153	0.0349
ENSRNOG00000002436	monocyte to macrophage differentiation associated	MMD	0.118	0.115
ENSRNOG00000002440	RAS like proto-oncogene B	RALB	0.425	0.000778
ENSRNOG00000002443	microfibril associated protein 3	MFAP3	-0.459	0.000555	Muller
ENSRNOG00000002449	MAGE family member D2	MAGED2	0.036	0.703
ENSRNOG00000002450	ribosomal RNA processing 15 homolog	RRP15	0.292	0.0664
ENSRNOG00000002452	thioredoxin domain containing 11	TXNDC11	-0.222	0.0528
ENSRNOG00000002454	ring finger protein 2	RNF2	-0.451	2.59e-08	Bipolar
ENSRNOG00000002456			0.836	1.27e-18
ENSRNOG00000002461	nidogen 1	NID1	-0.784	0.542	Vascular
ENSRNOG00000002468	tenascin R	TNR	0.17	0.051	Horizontal
ENSRNOG00000002469	tripartite motif containing 7	TRIM7	0.961	0.0714	Amacrine
ENSRNOG00000002470	interferon gamma inducible protein 47	Ifi47	1.932	0.00102	Vascular
ENSRNOG00000002471	DNA polymerase theta	POLQ	-0.405	0.42
ENSRNOG00000002473	odr-4 GPCR localization factor homolog	ODR4	-0.09	0.613
ENSRNOG00000002474	target of myb1 like 1 membrane trafficking protein	TOM1L1	-0.229	0.207	Bipolar
ENSRNOG00000002475	similar to tumor protein, translationally-controlled 1	RGD1565798	1.74	0.123
ENSRNOG00000002478	insulin induced gene 2	INSIG2	0.348	0.00672
ENSRNOG00000002480	G protein-coupled receptor 137B	Gpr137b	0.423	0.108
ENSRNOG00000002488	polypeptide N-acetylgalactosaminyltransferase 10	GALNT10	-0.871	0.00035	Muller
ENSRNOG00000002496	syntaxin binding protein 5L	STXBP5L	-0.122	0.294
ENSRNOG00000002504	spermatogenesis associated 17	SPATA17	-0.594	0.277	Rods
ENSRNOG00000002506	cyclin dependent kinase like 2	CDKL2	0.074	0.645
ENSRNOG00000002509	G protein nucleolar 3 like	GNL3L	0.196	0.00151
ENSRNOG00000002511	fms related receptor tyrosine kinase 4	FLT4	0.476	0.358	Vascular
ENSRNOG00000002512	G patch domain containing 2	Gpatch2	-0.372	0.0141
ENSRNOG00000002514	coiled-coil domain containing 93	CCDC93	0.337	0.0105	Bipolar
ENSRNOG00000002516	myotubularin 1	MTM1	-0.089	0.33	Amacrine
ENSRNOG00000002517	phosducin	PDC	-2.446	8.82e-199	Rods
ENSRNOG00000002520	lipopolysaccharide induced TNF factor	LITAF	1.988	1.86e-29	Vascular
ENSRNOG00000002524	G protein-coupled receptor 37	GPR37	0.39	2.96e-06	Muller
ENSRNOG00000002525	prostaglandin-endoperoxide synthase 2	PTGS2	1.321	8.04e-12
ENSRNOG00000002529	RAP2C, member of RAS oncogene family	RAP2C	0.1	0.457	Microglia
ENSRNOG00000002536			0.142	0.313
ENSRNOG00000002537	WNK lysine deficient protein kinase 3	WNK3	-0.042	0.849	Muller
ENSRNOG00000002538	erythrocyte membrane protein band 4.1 like 5	Epb41l5	-0.656	1.03e-10
ENSRNOG00000002540	ras homolog family member H	RHOH	-0.414	0.54	Microglia
ENSRNOG00000002541	PDS5 cohesin associated factor A	PDS5A	-0.245	0.0155
ENSRNOG00000002542	HEAT repeat containing 6	HEATR6	-0.284	0.00638	Bipolar
ENSRNOG00000002544	kinesin associated protein 3	KIFAP3	-0.045	0.565	RGCs
ENSRNOG00000002545	HUWE1 associated protein modifying stress responses	HAPSTR1	0.076	0.554
ENSRNOG00000002546	ring finger and CHY zinc finger domain containing 1	RCHY1	-0.004	0.983
ENSRNOG00000002548	tenascin N	TNN	1.167	0.179
ENSRNOG00000002549	5-hydroxytryptamine (serotonin) receptor 5B	Htr5b	-0.439	0.595
ENSRNOG00000002553			0.701	1.07e-14
ENSRNOG00000002556			0.061	0.833
ENSRNOG00000002563	MCTS1 re-initiation and release factor	MCTS1	-0.31	0.0866	Microglia
ENSRNOG00000002565	TATA-box binding protein associated factor 1	TAF1	-0.443	2.51e-10	Rods
ENSRNOG00000002568	suppressor of cytokine signaling 1	SOCS1	1.423	0.000472
ENSRNOG00000002569	mitochondrial ribosomal protein S14	MRPS14	0.377	0.000898	Muller
ENSRNOG00000002572	calcyclin binding protein	CACYBP	0.233	0.00196	Horizontal
ENSRNOG00000002574			0.04	0.735
ENSRNOG00000002575	SAP30 like	SAP30L	-0.415	0.0042
ENSRNOG00000002579	prostate androgen-regulated mucin-like protein 1	PARM1	0.025	0.972
ENSRNOG00000002580	tRNA methyltransferase 1 like	TRMT1L	-0.267	0.0231
ENSRNOG00000002585	cullin 4B	CUL4B	-0.209	0.0604
ENSRNOG00000002592	ribosomal protein S6 kinase A6	RPS6KA6	0.02	0.94	Bipolar
ENSRNOG00000002593	estrogen related receptor gamma	ESRRG	0.165	0.046
ENSRNOG00000002595	dipeptidyl peptidase like 10	DPP10	0.382	0.0225
ENSRNOG00000002599	GRB2 related adaptor protein	GRAP	0.22	0.808	Vascular
ENSRNOG00000002607	SRY-box transcription factor 9	SOX9	0.708	1.71e-06	Muller
ENSRNOG00000002609	endoplasmic reticulum oxidoreductase 1 beta	ERO1B	-0.25	0.0264
ENSRNOG00000002610	calcium regulated heat stable protein 1	CARHSP1	1.287	8.42e-10	Vascular
ENSRNOG00000002612	DExD-box helicase 52	DDX52	-0.254	0.0395	Muller
ENSRNOG00000002615	phosphomannomutase 2	PMM2	-0.27	0.0211
ENSRNOG00000002618	influenza virus NS1A binding protein	IVNS1ABP	-1.047	0.00105
ENSRNOG00000002625	protein tyrosine phosphatase non-receptor type 4	PTPN4	-0.193	0.0148
ENSRNOG00000002626	carbonic anhydrase 10	CA10	0.496	1.95e-07	Bipolar
ENSRNOG00000002627	potassium channel tetramerization domain containing 3	KCTD3	-0.526	9.7e-19	Bipolar
ENSRNOG00000002630	CCR4-NOT transcription complex subunit 8	CNOT8	-0.113	0.301
ENSRNOG00000002632	nascent polypeptide associated complex subunit alpha	NACA	-0.052	0.539
ENSRNOG00000002635			0.285	0.124
ENSRNOG00000002636	4-aminobutyrate aminotransferase	ABAT	0.553	3.17e-13
ENSRNOG00000002642	prostaglandin E synthase 3	PTGES3	0.06	0.521	Amacrine
ENSRNOG00000002643	UDP-glucose 6-dehydrogenase	UGDH	-0.892	9.02e-29
ENSRNOG00000002644	UTP18 small subunit processome component	UTP18	-0.467	1.41e-06
ENSRNOG00000002645	gem nuclear organelle associated protein 5	GEMIN5	-0.26	0.0419	Muller
ENSRNOG00000002652	RAP1 GTPase activating protein 2	RAP1GAP2	0.556	1.11e-09	RGCs
ENSRNOG00000002653	potassium two pore domain channel subfamily K member 2	KCNK2	0.469	0.00368
ENSRNOG00000002657	phospholipase A2 group IVA	PLA2G4A	0.537	0.0136
ENSRNOG00000002659	class II major histocompatibility complex transactivator	CIITA	-1.795	7.79e-26	Microglia
ENSRNOG00000002660	MAGE family member E1	MAGEE1	0.744	2.58e-13
ENSRNOG00000002662	polysaccharide biosynthesis domain containing 1	PBDC1	0.134	0.431	Rods
ENSRNOG00000002664	epithelial membrane protein 2	EMP2	1.043	0.0126
ENSRNOG00000002667	laminin subunit gamma 2	LAMC2	0	0.999	Muller
ENSRNOG00000002669	clustered mitochondria homolog	CLUH	0.14	0.0936	Amacrine
ENSRNOG00000002671	NME/NM23 nucleoside diphosphate kinase 2	NME2	0.722	2.63e-17
ENSRNOG00000002680	laminin subunit gamma 1	LAMC1	0.052	0.894
ENSRNOG00000002682	zinc finger protein 692	ZNF692	-0.286	0.0101	Bipolar
ENSRNOG00000002693	NME/NM23 nucleoside diphosphate kinase 1	NME1	0.326	1.3e-05	Bipolar
ENSRNOG00000002695	transcription factor B2, mitochondrial	TFB2M	-0.214	0.271	Muller
ENSRNOG00000002697	myotubularin related protein 1	MTMR1	0.228	0.0602
ENSRNOG00000002705	vacuolar protein sorting 4 homolog B	VPS4B	0.052	0.638	Microglia
ENSRNOG00000002708	PHD finger protein 8	PHF8	-0.644	4.19e-23	Bipolar
ENSRNOG00000002710	consortin, connexin sorting protein	CNST	-0.205	0.0165
ENSRNOG00000002711	NUF2 component of NDC80 kinetochore complex	NUF2	-0.254	0.57
ENSRNOG00000002713	zinc finger protein 672	ZNF672	-0.588	3.78e-07	Rods
ENSRNOG00000002714	methyltransferase 22, Kin17 lysine	METTL22	-0.145	0.264	Bipolar
ENSRNOG00000002721	NADH:ubiquinone oxidoreductase subunit B4	NDUFB4	-0.166	0.0758	Bipolar
ENSRNOG00000002722	SEC14 like lipid binding 1	SEC14L1	0.405	2.78e-07	Amacrine
ENSRNOG00000002723	selectin E	SELE	0.435	0.544
ENSRNOG00000002724	phosphoribosyl pyrophosphate synthetase associated protein 2	PRPSAP2	-0.276	4.52e-05	Bipolar
ENSRNOG00000002728	betacellulin	BTC	0.117	0.767	Muller
ENSRNOG00000002730	regulator of G protein signaling 5	RGS5	0.054	0.74	Vascular
ENSRNOG00000002734			0.289	0.303
ENSRNOG00000002735	DExH-box helicase 9	DHX9	-0.09	0.109
ENSRNOG00000002736	RAB GTPase activating protein 1 like	RABGAP1L	0.234	0.232
ENSRNOG00000002746	follistatin like 1	FSTL1	-0.138	0.817
ENSRNOG00000002748	coiled-coil domain containing 43	CCDC43	-0.282	0.0591	Bipolar
ENSRNOG00000002749	sperm associated antigen 9	SPAG9	-0.172	0.000492
ENSRNOG00000002750	ring finger and CCCH-type domains 1	Rc3h1	-0.382	0.00117	Muller
ENSRNOG00000002751	zinc finger DHHC-type palmitoyltransferase 15	ZDHHC15	0.004	0.991
ENSRNOG00000002753	ADAM metallopeptidase domain 11	ADAM11	0.126	0.296
ENSRNOG00000002755	platelet activating factor acetylhydrolase 1b regulatory subunit 1	PAFAH1B1	0.121	0.0436	RGCs
ENSRNOG00000002757	transcriptional adaptor 2A	TADA2A	-0.305	0.00417
ENSRNOG00000002759	lipoic acid synthetase	LIAS	-0.037	0.825	Bipolar
ENSRNOG00000002763	unc-51 like autophagy activating kinase 2	ULK2	-0.038	0.738	Amacrine
ENSRNOG00000002764	methyltransferase 16, RNA N6-adenosine	Mettl16	-0.086	0.441
ENSRNOG00000002767	discs large MAGUK scaffold protein 3	DLG3	0.18	0.0117
ENSRNOG00000002773	regulator of G protein signaling 4	RGS4	-0.034	0.769
ENSRNOG00000002775	N-acetylneuraminate pyruvate lyase	NPL	0.437	0.0232	Microglia
ENSRNOG00000002778	apoptosis antagonizing transcription factor	AATF	-0.04	0.846	Muller
ENSRNOG00000002781	3-ketodihydrosphingosine reductase	KDSR	-0.156	0.254	Muller
ENSRNOG00000002783	serpin family C member 1	SERPINC1	-0.422	0.00244
ENSRNOG00000002790	ATP binding cassette subfamily B member 7	ABCB7	-0.101	0.524
ENSRNOG00000002791			1.047	0.00852
ENSRNOG00000002793	somatostatin receptor 2	SSTR2	0.276	0.387	Vascular
ENSRNOG00000002795	component of oligomeric golgi complex 1	COG1	-0.47	5.64e-07
ENSRNOG00000002797	G protein-coupled receptor 156	GPR156	0.213	0.721	Muller
ENSRNOG00000002800	glycerophosphodiester phosphodiesterase domain containing 2	GDPD2	1.235	1.58e-15	Muller
ENSRNOG00000002802	C-X-C motif chemokine ligand 2	CXCL2	-0.246	0.821
ENSRNOG00000002807	septin 9	SEPTIN9	0.721	6.21e-08
ENSRNOG00000002810	glutamine-fructose-6-phosphate transaminase 2	GFPT2	0.627	0.136	Muller
ENSRNOG00000002811	BMP/retinoic acid inducible neural specific 3	BRINP3	0.209	0.64	Amacrine
ENSRNOG00000002812	LIM homeobox 1	LHX1	0.343	0.169	Horizontal
ENSRNOG00000002813	aspartyl-tRNA synthetase 2, mitochondrial	DARS2	-0.252	0.0341
ENSRNOG00000002814			0.294	0.581
ENSRNOG00000002818	elongation factor Tu GTP binding domain containing 2	EFTUD2	-0.094	0.268	Horizontal
ENSRNOG00000002821	PH domain and leucine rich repeat protein phosphatase 1	PHLPP1	0.358	9.48e-05	Muller
ENSRNOG00000002823	mitogen-activated protein kinase 9	MAPK9	-0.319	4.37e-06	Amacrine
ENSRNOG00000002824			0.115	0.695
ENSRNOG00000002826	hydroxysteroid 17-beta dehydrogenase 7	HSD17B7	-0.277	0.13
ENSRNOG00000002827	RNA binding fox-1 homolog 1	RBFOX1	0.544	3.46e-09
ENSRNOG00000002828	transducer of ERBB2, 1	TOB1	-0.42	7.14e-11
ENSRNOG00000002831	WAP, follistatin/kazal, immunoglobulin, kunitz and netrin domain containing 2	WFIKKN2	1.699	0.00416	Muller
ENSRNOG00000002832	solute carrier family 16 member 2	SLC16A2	0.231	0.26	Muller
ENSRNOG00000002833	glycogen synthase kinase 3 beta	GSK3B	0.068	0.486
ENSRNOG00000002835	LUC7 like 3 pre-mRNA splicing factor	LUC7L3	-0.566	1.46e-06
ENSRNOG00000002838			-0.188	0.17
ENSRNOG00000002839	solute carrier family 19 member 2	SLC19A2	0.07	0.617	Muller
ENSRNOG00000002840	ATP synthase F1 subunit beta	ATP5F1B	-0.396	1.82e-09
ENSRNOG00000002841	CDC42 binding protein kinase alpha	CDC42BPA	0.114	0.0674
ENSRNOG00000002844	ubiquitin specific peptidase 27 X-linked	USP27X	0.618	0.043	Bipolar
ENSRNOG00000002848	monoamine oxidase A	MAOA	0.261	0.00695
ENSRNOG00000002851	VCP nuclear cofactor family member 1	VCF1	-0.368	6.3e-05
ENSRNOG00000002852	myosin XIX	MYO19	-0.02	0.914	Bipolar
ENSRNOG00000002855	replication factor C subunit 1	RFC1	-0.073	0.516
ENSRNOG00000002860	coiled-coil domain containing 181	CCDC181	-1.002	1.66e-28
ENSRNOG00000002862	chloride voltage-gated channel 5	CLCN5	-0.361	0.0195
ENSRNOG00000002863	calcium voltage-gated channel subunit alpha1 E	CACNA1E	0.018	0.925
ENSRNOG00000002864	nucleus accumbens associated 1	NACC1	0.244	0.0063	RGCs
ENSRNOG00000002866	Ras association domain family member 6	RASSF6	1.049	0.00497	Muller
ENSRNOG00000002871			-0.294	0.000666
ENSRNOG00000002874	RNA binding motif protein 25	Rbm25	-0.255	0.00773
ENSRNOG00000002875	kelch like family member 20	KLHL20	-0.443	4.28e-06
ENSRNOG00000002876	eukaryotic elongation factor 2 lysine methyltransferase	EEF2KMT	-0.835	0.00252
ENSRNOG00000002879	presenilin 2	PSEN2	-0.263	0.0185	RGCs
ENSRNOG00000002881	discoidin domain receptor tyrosine kinase 2	DDR2	0.14	0.88	Muller
ENSRNOG00000002882	zinc finger CCHC-type containing 2	ZCCHC2	-0.309	0.00492
ENSRNOG00000002883	ALG1, chitobiosyldiphosphodolichol beta-mannosyltransferase	Alg1	-0.209	0.106	Muller
ENSRNOG00000002884	basic leucine zipper nuclear factor 1	BLZF1	-0.599	9.19e-08	Horizontal
ENSRNOG00000002886	myosin heavy chain 10	MYH10	0.356	9.88e-07	RGCs
ENSRNOG00000002894	MAX network transcriptional repressor	Mnt	-0.037	0.714	Bipolar
ENSRNOG00000002895	N-acetylglucosamine-1-phosphodiester alpha-N-acetylglucosaminidase	NAGPA	0.029	0.899	Microglia
ENSRNOG00000002896			0.708	2.95e-06
ENSRNOG00000002898	NME/NM23 family member 7	NME7	-0.601	3.88e-06
ENSRNOG00000002899	A-kinase anchoring protein 10	AKAP10	-0.457	9.15e-06
ENSRNOG00000002903	sperm antigen with calponin homology and coiled-coil domains 1	SPECC1	1.153	9.83e-28	Microglia
ENSRNOG00000002904	arrestin 3	ARR3	-0.071	0.823	Cones
ENSRNOG00000002905	coiled-coil domain containing 103	CCDC103	-1.204	0.048
ENSRNOG00000002907	pleckstrin homology domain containing A6	Plekha6	-0.126	0.089
ENSRNOG00000002908	solute carrier family 35 member A4	SLC35A4	0.028	0.808	Muller
ENSRNOG00000002912	poly(A)-specific ribonuclease	PARN	-0.273	0.0436	Muller
ENSRNOG00000002914	tRNA methyltransferase 1	TRMT1	0.14	0.25
ENSRNOG00000002915	tripartite motif-containing 11	Trim11	-0.1	0.398
ENSRNOG00000002916	carbonic anhydrase 4	CA4	0.209	0.869
ENSRNOG00000002918	family with sequence similarity 187, member A	Fam187a	1.071	0.323
ENSRNOG00000002919	glial fibrillary acidic protein	GFAP	4.814	3.73e-69	Muller
ENSRNOG00000002922	adenosine A2b receptor	ADORA2B	1.129	4.42e-06	Muller
ENSRNOG00000002925			-0.702	0.333
ENSRNOG00000002926	UDP-N-acetylglucosamine pyrophosphorylase 1	UAP1	-0.196	0.224
ENSRNOG00000002928	guanylate kinase 1	GUK1	-0.835	2.83e-26	Rods
ENSRNOG00000002930	periplakin	PPL	-0.469	0.736
ENSRNOG00000002932	WD repeat domain 19	WDR19	-0.784	2.63e-18	Muller
ENSRNOG00000002934	ATPase Na+/K+ transporting subunit beta 1	ATP1B1	0.144	0.0274
ENSRNOG00000002935	ankyrin repeat domain 40	ANKRD40	0.072	0.413	RGCs
ENSRNOG00000002940	ankyrin repeat domain 17	ANKRD17	-0.378	2.28e-10
ENSRNOG00000002941	U2AF homology motif kinase 1	UHMK1	-0.254	0.00685
ENSRNOG00000002943	mitochondrial ribosomal protein L55	MRPL55	0.108	0.47
ENSRNOG00000002944	chromosome 1 open reading frame 35	C1orf35	-0.036	0.818
ENSRNOG00000002946			3.674	1.35e-08
ENSRNOG00000002947	dermatopontin	Dpt	3.16	0.0131
ENSRNOG00000002948	ATP binding cassette subfamily C member 3	ABCC3	-0.655	1.36e-06
ENSRNOG00000002949	phosphatidylglycerophosphate synthase 1	PGS1	0.196	0.0601
ENSRNOG00000002950	LYL1 basic helix-loop-helix family member	LYL1	0.636	0.253	Microglia
ENSRNOG00000002953			-0.422	0.00693
ENSRNOG00000002956	stromal interaction molecule 2	STIM2	0.252	0.0187	Bipolar
ENSRNOG00000002959	shroom family member 4	SHROOM4	-0.336	0.138	Vascular
ENSRNOG00000002960	norrin cystine knot growth factor NDP	Ndp	0.617	0.108	Muller
ENSRNOG00000002963	complement C1q like 1	C1QL1	0.637	3.3e-07	Horizontal
ENSRNOG00000002968	TNF superfamily member 4	TNFSF4	2.84	0.0284
ENSRNOG00000002969	inositol-trisphosphate 3-kinase B	ITPKB	1.184	2.25e-13	Vascular
ENSRNOG00000002970	zinc finger SWIM-type containing 7	ZSWIM7	-0.814	0.0122
ENSRNOG00000002972	spermatogenesis associated 46	SPATA46	-0.759	0.0957
ENSRNOG00000002975	cysteine rich protein 2	CRIP2	2.192	0.00941	Vascular
ENSRNOG00000002976	cilia and flagella associated protein 91	CFAP91	0.386	0.436
ENSRNOG00000002977	tetratricopeptide repeat domain 19	TTC19	-0.514	1.58e-05
ENSRNOG00000002978	Fas ligand	FASLG	0.889	0.13
ENSRNOG00000002979	T-box transcription factor 19	Tbx19	0.118	0.855	Microglia
ENSRNOG00000002980	TSR1 ribosome maturation factor	TSR1	-0.177	0.0635
ENSRNOG00000002983	nuclear factor I X	NFIX	0.84	9.07e-12	Muller
ENSRNOG00000002984	bone morphogenetic protein 15	BMP15	-1.27	3.1e-13
ENSRNOG00000002986	EF-hand domain containing 2	EFHC2	-0.234	0.544	Muller
ENSRNOG00000002989	N-myristoyltransferase 1	NMT1	-0.08	0.294
ENSRNOG00000002991	serine racemase	SRR	-0.085	0.513
ENSRNOG00000002997	NHERF family PDZ scaffold protein 2	NHERF2	0.497	7.39e-05
ENSRNOG00000002999	translocase of inner mitochondrial membrane domain containing 1	TIMMDC1	-0.155	0.279	Muller
ENSRNOG00000003003	TBC1 domain family member 19	TBC1D19	0.076	0.554
ENSRNOG00000003005	RasGEF domain family member 1C	RASGEF1C	0.649	0.244	Amacrine
ENSRNOG00000003011	GADD45G interacting protein 1	GADD45GIP1	0.124	0.425
ENSRNOG00000003013			-0.752	5.73e-10
ENSRNOG00000003014	protein O-glucosyltransferase 1	POGLUT1	-0.086	0.453
ENSRNOG00000003018	olfactomedin like 2B	OLFML2B	0.67	0.00853	Microglia
ENSRNOG00000003019	ubinuclein 1	UBN1	-0.437	9.47e-10
ENSRNOG00000003025	nucleosome assembly protein 1 like 2	NAP1L2	0.419	5.95e-06	RGCs
ENSRNOG00000003026	RAD23 homolog A, nucleotide excision repair protein	RAD23A	0.232	0.00256	Bipolar
ENSRNOG00000003028	dynein axonemal heavy chain 17	DNAH17	-0.383	0.563	Bipolar
ENSRNOG00000003029	calreticulin	CALR	-0.138	0.13
ENSRNOG00000003031	ATPase plasma membrane Ca2+ transporting 4	ATP2B4	0.663	1.7e-09
ENSRNOG00000003033	phospholipase C delta 3	PLCD3	-1.557	2.83e-75	Bipolar
ENSRNOG00000003038	SFT2 domain containing 2	SFT2D2	-0.52	0.145
ENSRNOG00000003041	SMG6 nonsense mediated mRNA decay factor	SMG6	-0.02	0.881	Bipolar
ENSRNOG00000003042	methyltransferase 13, eEF1A N-terminus and K55	METTL13	-0.095	0.416	Microglia
ENSRNOG00000003048	TOR signaling pathway regulator	TIPRL	0.005	0.969	Muller
ENSRNOG00000003049	hydroxysteroid 17-beta dehydrogenase 10	HSD17B10	0.645	0.000898	RGCs
ENSRNOG00000003050	TBC1 domain family member 9B	TBC1D9B	0.337	2.69e-05
ENSRNOG00000003052	cytochrome c oxidase assembly factor COX18	COX18	-0.253	0.12
ENSRNOG00000003059	opticin	OPTC	-1.304
ENSRNOG00000003062	similar to kelch domain containing 2	LOC679960	-0.136	0.844
ENSRNOG00000003063	phosphorylase kinase regulatory subunit alpha 1	PHKA1	0.042	0.752	Vascular
ENSRNOG00000003064	bone marrow stromal cell antigen 1	BST1	-0.388	0.771
ENSRNOG00000003065	glyoxylate reductase 1 homolog	GLYR1	0.162	0.0166
ENSRNOG00000003068	MRN complex interacting protein	MRNIP	0.399	0.0792
ENSRNOG00000003069	CD38 molecule	CD38	1.2	0.0508	Microglia
ENSRNOG00000003070	phosphatidylinositol glycan anchor biosynthesis class L	PIGL	-0.288	0.0537	Amacrine
ENSRNOG00000003071	vesicle associated membrane protein 4	VAMP4	0.016	0.889
ENSRNOG00000003073	G protein-coupled receptor 161	GPR161	1.109	1.48e-08
ENSRNOG00000003075	transmembrane protein 39A	TMEM39A	-0.122	0.483
ENSRNOG00000003076	RNA binding motif single stranded interacting protein 2	RBMS2	0.071	0.565
ENSRNOG00000003078	DDB1 and CUL4 associated factor 6	DCAF6	-0.156	0.0682
ENSRNOG00000003081	RIB43A domain with coiled-coils 1	RIBC1	-0.327	0.121	Rods
ENSRNOG00000003084	poly(ADP-ribose) polymerase 1	PARP1	-0.408	6.16e-10	Bipolar
ENSRNOG00000003086	centromere protein V	CENPV	0.972	6.33e-11
ENSRNOG00000003088	Rho GTPase activating protein 31	ARHGAP31	1.03	2.03e-11
ENSRNOG00000003095	fibroblast growth factor binding protein 1	FGFBP1	-1.944	0.0294
ENSRNOG00000003098	prominin 1	PROM1	-1.676	3.38e-90	Rods
ENSRNOG00000003099	ubiquilin 2	UBQLN2	0.367	0.000159
ENSRNOG00000003100	dual specificity phosphatase 12	DUSP12	-0.371	0.0181	Bipolar
ENSRNOG00000003104	transient receptor potential cation channel subfamily V member 2	TRPV2	0.472	0.0181	Microglia
ENSRNOG00000003105	kinesin family member 19	KIF19	-1.401	2.54e-49
ENSRNOG00000003108	acyl-CoA binding domain containing 4	ACBD4	0.03	0.794	Bipolar
ENSRNOG00000003109	BTB domain containing 17	BTBD17	-0.81	5.05e-06	Bipolar
ENSRNOG00000003114	beta-1,4-galactosyltransferase 4	B4GALT4	0.228	0.232	Muller
ENSRNOG00000003116			-0.07	0.633
ENSRNOG00000003117	proteasome 26S subunit, non-ATPase 12	PSMD12	-0.079	0.382	RGCs
ENSRNOG00000003120	proline and arginine rich end leucine rich repeat protein	PRELP	1.105	6.85e-10	Muller
ENSRNOG00000003121	reticulon 4 receptor like 1	RTN4RL1	0.619	3.45e-17
ENSRNOG00000003122	histone deacetylase 8	HDAC8	-0.036	0.891
ENSRNOG00000003123	replication protein A1	RPA1	0.06	0.381
ENSRNOG00000003125	rogdi atypical leucine zipper	ROGDI	0.066	0.518	Bipolar
ENSRNOG00000003127	SPRY domain containing 4	SPRYD4	0.317	0.139	Bipolar
ENSRNOG00000003129	zinc finger protein 496	ZNF496	-0.476	0.000218	Microglia
ENSRNOG00000003131	TNF receptor associated factor 7	TRAF7	0.079	0.447
ENSRNOG00000003132	major intrinsic protein of lens fiber	MIP	-6.205
ENSRNOG00000003134	solute carrier family 4 member 4	SLC4A4	-0.405	0.606
ENSRNOG00000003136	Fc receptor like A	FCRLA	3.223	0.000118
ENSRNOG00000003139	structural maintenance of chromosomes 1A	SMC1A	-0.109	0.1
ENSRNOG00000003144	G protein-coupled receptor class C group 5 member C	GPRC5C	-0.571	0.664
ENSRNOG00000003147	sequestosome 1	SQSTM1	0.571	2.48e-22	Muller
ENSRNOG00000003148			0.978	1.96e-05
ENSRNOG00000003149			-0.386	0.000136
ENSRNOG00000003150	mitochondrial pyruvate carrier 2	MPC2	-0.01	0.946
ENSRNOG00000003151	bifunctional apoptosis regulator	BFAR	-0.398	7.08e-05
ENSRNOG00000003160			2.456	0.00948
ENSRNOG00000003163	succinate dehydrogenase complex subunit C	SDHC	-0.05	0.63
ENSRNOG00000003170	NLR family pyrin domain containing 3	NLRP3	1.132	0.0128	Microglia
ENSRNOG00000003172	serpin family F member 1	SERPINF1	-0.683	0.45
ENSRNOG00000003174	transmembrane anterior posterior transformation 1	TAPT1	-0.965	4e-32
ENSRNOG00000003177	methionine adenosyltransferase 2 non-catalytic beta subunit	MAT2B	-0.097	0.248
ENSRNOG00000003178	MAGE family member H1	MAGEH1	0.08	0.572	Muller
ENSRNOG00000003183	fibromodulin	FMOD	0.324	0.762	Muller
ENSRNOG00000003185	acyl-CoA binding domain containing 3	ACBD3	-0.048	0.571
ENSRNOG00000003186	ankyrin repeat and sterile alpha motif domain containing 3	ANKS3	-0.118	0.195
ENSRNOG00000003187	armadillo repeat containing X-linked 5	ARMCX5	-0.31	0.155	Bipolar
ENSRNOG00000003189	Cbp/p300 interacting transactivator with Glu/Asp rich carboxy-terminal domain 1	CITED1	-0.006	0.986
ENSRNOG00000003191	G protein-coupled receptor associated sorting protein family member 3	GPRASP3	-0.325	0.000935	Muller
ENSRNOG00000003195	CASK interacting protein 1	CASKIN1	0.491	7.4e-11	RGCs
ENSRNOG00000003198	bMERB domain containing 1	BMERB1	0.424	2.02e-06
ENSRNOG00000003201	ribosomal protein S4 Y-linked 1	RPS4Y1	0.147	0.112	Rods
ENSRNOG00000003203	HEXIM P-TEFb complex subunit 1	HEXIM1	0.311	0.000395	Vascular
ENSRNOG00000003205	LIM domain binding 2	LDB2	0.307	0.00331
ENSRNOG00000003206	actin related protein 3	ACTR3	0.016	0.825	Microglia
ENSRNOG00000003207	formin-like 1	Fmnl1	0.591	1.98e-05
ENSRNOG00000003208	ERCC excision repair 6 like, spindle assembly checkpoint helicase	ERCC6L	-1.477	0.00219
ENSRNOG00000003209	Purkinje cell protein 4-like 1	Pcp4l1	0.555	5.35e-05	Bipolar
ENSRNOG00000003211	signal recognition particle 9	SRP9	0.046	0.778	Muller
ENSRNOG00000003213	helicase with zinc finger	HELZ	-0.443	1.48e-06
ENSRNOG00000003214			1.319	4.24e-09
ENSRNOG00000003215	zinc finger protein 287	ZNF287	-0.504	0.000175
ENSRNOG00000003217	galectin 3 binding protein	LGALS3BP	1.296	0.00966	Muller
ENSRNOG00000003218	zinc finger protein 286A	ZNF286A	0.13	0.542	Vascular
ENSRNOG00000003219			0.343	0.181
ENSRNOG00000003220	H3.3 histone A	H3-3A/H3-3B	-0.429	3.85e-05
ENSRNOG00000003221	myocilin	MYOC	-0.426	0.578
ENSRNOG00000003223	delta 4-desaturase, sphingolipid 1	DEGS1	0.27	0.0334
ENSRNOG00000003224	nudix hydrolase 16 like 1	NUDT16L1	0.264	0.0739	Muller
ENSRNOG00000003226	myosin phosphatase Rho interacting protein	MPRIP	0.085	0.35
ENSRNOG00000003228	MID1 interacting protein 1	MID1IP1	0.46	0.000141
ENSRNOG00000003229	tetraspanin 7	TSPAN7	0.157	0.0139
ENSRNOG00000003232	NHERF family PDZ scaffold protein 1	NHERF1	0.378	0.000667	Muller
ENSRNOG00000003233	serpin family F member 2	SERPINF2	1.618	0.000162
ENSRNOG00000003234	mahogunin ring finger 1	MGRN1	0.245	0.00504	Amacrine
ENSRNOG00000003235	alpha-1,3-mannosyl-glycoprotein 4-beta-N-acetylglucosaminyltransferase B	MGAT4B	0.528	0.00051	Horizontal
ENSRNOG00000003237	tumor protein p53 binding protein 2	TP53BP2	0.028	0.841	Rods
ENSRNOG00000003239	calcium activated nucleotidase 1	CANT1	-0.014	0.923
ENSRNOG00000003241	gamma-aminobutyric acid type A receptor subunit gamma2	GABRG2	0.448	1.06e-10
ENSRNOG00000003242	GULP PTB domain containing engulfment adaptor 1	GULP1	-0.939	1.74e-11	Muller
ENSRNOG00000003243	WD repeat domain 81	WDR81	0.207	0.029	Microglia
ENSRNOG00000003244	leukotriene C4 synthase	LTC4S	0.65	0.267	Microglia
ENSRNOG00000003247	SDE2 telomere maintenance homolog	SDE2	-0.319	0.000315
ENSRNOG00000003248	myelin protein zero like 1	MPZL1	0.413	0.00101
ENSRNOG00000003251	beta-1,3-galactosyltransferase 2	B3GALT2	0.145	0.122	Bipolar
ENSRNOG00000003253	quinoid dihydropteridine reductase	QDPR	0.117	0.341	Muller
ENSRNOG00000003254	interleukin 23 subunit alpha	IL23A	-0.091	0.852	Vascular
ENSRNOG00000003256	cyclin G1	CCNG1	-0.375	5.63e-08
ENSRNOG00000003258	cell division cycle 73	CDC73	-0.494	1.02e-06	Bipolar
ENSRNOG00000003259	C1q and TNF related 1	C1QTNF1	-0.114	0.789	Vascular
ENSRNOG00000003260	nuclear receptor subfamily 1 group I member 3	NR1I3	-0.237	0.153	Microglia
ENSRNOG00000003261	ubiquitin specific peptidase 9 X-linked	USP9X	-0.288	1.77e-05	Bipolar
ENSRNOG00000003262	calcium voltage-gated channel auxiliary subunit gamma 4	CACNG4	0.463	0.000149	Muller
ENSRNOG00000003264	N-acetyltransferase 9 (putative)	NAT9	0.037	0.833	Bipolar
ENSRNOG00000003266	EF-hand calcium binding domain 15	Efcab15	1.821	4.02e-05
ENSRNOG00000003267	pyrroline-5-carboxylate reductase 2	PYCR2	-0.109	0.38	Muller
ENSRNOG00000003268	mastermind like transcriptional coactivator 1	MAML1	-0.546	2.58e-05
ENSRNOG00000003269	ATPase H+ transporting V0 subunit e1	ATP6V0E1	0.451	0.00857
ENSRNOG00000003273	spermatogenesis associated 20	SPATA20	1.486	5.24e-11	RGCs
ENSRNOG00000003276	myosin ID	MYO1D	0.639	0.00626	Vascular
ENSRNOG00000003278	mitogen-activated protein kinase kinase kinase 14	MAP3K14	0.657	3.78e-05	Microglia
ENSRNOG00000003279			0.164	0.499
ENSRNOG00000003280	glutamate ionotropic receptor NMDA type subunit 2C	GRIN2C	-0.206	0.11
ENSRNOG00000003281	minichromosome maintenance 9 homologous recombination repair factor	MCM9	-0.82	1.66e-15	Bipolar
ENSRNOG00000003283	RCSD domain containing 1	RCSD1	0.639	0.112
ENSRNOG00000003284	epsin 3	EPN3	0.568	0.00778
ENSRNOG00000003285	MPV17 mitochondrial inner membrane protein like	MPV17L	0.347	0.315
ENSRNOG00000003287			1.487	0.0196
ENSRNOG00000003288	calcium voltage-gated channel auxiliary subunit gamma 5	CACNG5	0.274	0.0602
ENSRNOG00000003289	leucine aminopeptidase 3	LAP3	0.623	2.75e-08	Microglia
ENSRNOG00000003291	cellular repressor of E1A stimulated genes 1	CREG1	0.314	0.0327	Microglia
ENSRNOG00000003296	deoxycytidine kinase	DCK	0.494	0.00584	Microglia
ENSRNOG00000003300	BTG anti-proliferation factor 2	BTG2	-0.546	4.91e-10
ENSRNOG00000003302	folliculin	FLCN	-0.171	0.0518	Muller
ENSRNOG00000003304	chondroadherin	CHAD	1.237	0.00382
ENSRNOG00000003307	glutaryl-CoA dehydrogenase	GCDH	-0.284	0.00134
ENSRNOG00000003310	transmembrane protein 63A	TMEM63A	1.149	0.00142	Microglia
ENSRNOG00000003313	glycine receptor alpha 2	GLRA2	0.226	0.136	Amacrine
ENSRNOG00000003326	RRN3 homolog, RNA polymerase I transcription factor	RRN3	-0.123	0.292
ENSRNOG00000003328	cell death inducing p53 target 1	CDIP1	0.082	0.445
ENSRNOG00000003329	protein phosphatase, Mg2+/Mn2+ dependent 1D	PPM1D	-0.401	2.76e-05	Bipolar
ENSRNOG00000003330	acyl-CoA synthetase family member 2	ACSF2	0.775	1.1e-10
ENSRNOG00000003332	5',3'-nucleotidase, mitochondrial	NT5M	-0.433	0.000468	RGCs
ENSRNOG00000003334	kelch like family member 21	KLHL21	0.572	0.00271	Muller
ENSRNOG00000003336	myosin binding protein H	MYBPH	0.811	1.75e-13
ENSRNOG00000003338	peripheral myelin protein 22	PMP22	0.352	0.327	Muller
ENSRNOG00000003343	calnexin	CANX	0.132	0.075
ENSRNOG00000003346	FA complementation group B	FANCB	0.244	0.37
ENSRNOG00000003348	ras related dexamethasone induced 1	RASD1	-0.032	0.92	Muller
ENSRNOG00000003349	collagen type XXIII alpha 1 chain	COL23A1	0.158	0.174	Muller
ENSRNOG00000003350	motile sperm domain containing 2	MOSPD2	-0.021	0.91
ENSRNOG00000003354	poly(A) binding protein cytoplasmic 5	PABPC5	1.057	0.147	Bipolar
ENSRNOG00000003357	collagen type III alpha 1 chain	COL3A1	0.982	0.135	Vascular
ENSRNOG00000003359	O-linked N-acetylglucosamine (GlcNAc) transferase	OGT	-0.334	0.00139
ENSRNOG00000003365	cell adhesion molecule 3	CADM3	0.562	7.12e-14
ENSRNOG00000003367	transmembrane protein 220	TMEM220	0.61	0.384	Muller
ENSRNOG00000003374	coiled-coil domain containing 85A	CCDC85A	0.485	0.0175
ENSRNOG00000003384	heparan sulfate-glucosamine 3-sulfotransferase 3B1	HS3ST3B1	-2.165	5.23e-54	Photoreceptors
ENSRNOG00000003385	glutaredoxin 2	GLRX2	0.267	0.0264
ENSRNOG00000003386	RNA binding protein, fox-1 homolog (C. elegans) 3	Rbfox3	0.797	5.25e-08	RGCs
ENSRNOG00000003388	centromere protein F	CENPF	-0.715	0.0683	Bipolar
ENSRNOG00000003392	G-rich RNA sequence binding factor 1	GRSF1	-0.082	0.254
ENSRNOG00000003395			-0.385	0.261
ENSRNOG00000003397	ADP-ribose/CDP-alcohol diphosphatase, manganese dependent	ADPRM	-0.272	0.0895	Rods
ENSRNOG00000003398	translocase of outer mitochondrial membrane 40 like	TOMM40L	-0.05	0.738
ENSRNOG00000003399	heterogeneous nuclear ribonucleoprotein H1	Hnrnph1	-0.032	0.773	Bipolar
ENSRNOG00000003400	flavin containing dimethylaniline monoxygenase 4	FMO4	0.449	0.464
ENSRNOG00000003402	syntaxin 6	STX6	-0.076	0.422	Amacrine
ENSRNOG00000003403	solute carrier family 35 member F5	SLC35F5	-0.488	1.98e-06	Muller
ENSRNOG00000003407	protein tyrosine phosphatase, non-receptor type 14	Ptpn14	-1.34	1.17e-11	Vascular
ENSRNOG00000003424	elaC ribonuclease Z 2	ELAC2	-0.279	0.0117	RGCs
ENSRNOG00000003428	RUN and FYVE domain containing 3	RUFY3	-0.012	0.883	Bipolar
ENSRNOG00000003430	coagulation factor IX	F9	2.934	0.00384
ENSRNOG00000003434	Ro60, Y RNA binding protein	RO60	-1.031	4.51e-15
ENSRNOG00000003435	MCF.2 cell line derived transforming sequence	MCF2	0.387	0.356	RGCs
ENSRNOG00000003439	interleukin 15	IL15	0.344	0.313
ENSRNOG00000003442	adenosine A1 receptor	ADORA1	0.752	3.12e-16	Muller
ENSRNOG00000003443	KLF transcription factor 1	KLF1	0.06	0.907
ENSRNOG00000003453	LY6/PLAUR domain containing 1	LYPD1	0.842	1.33e-23
ENSRNOG00000003455	zinc finger protein 205	ZNF205	-0.336	0.00473	Muller
ENSRNOG00000003457	BICD family like cargo adaptor 2	BICDL2	0.037	0.933
ENSRNOG00000003461	zinc finger protein 330	ZNF330	-0.311	0.000105	Bipolar
ENSRNOG00000003463	sterol regulatory element binding transcription factor 1	SREBF1	0.425	2.39e-06	Muller
ENSRNOG00000003464	HID1 domain containing	HID1	0.408	1.49e-05	Bipolar
ENSRNOG00000003468	calpain 8	CAPN8	-2.151	0.00932
ENSRNOG00000003469	microtubule associated serine/threonine kinase 1	MAST1	-0.402	3e-08
ENSRNOG00000003470	FUN14 domain containing 1	FUNDC1	0.476	7.94e-07	Muller
ENSRNOG00000003472	ATPase phospholipid transporting 11C	ATP11C	-0.392	0.000536
ENSRNOG00000003479	ring finger protein 150	RNF150	0.239	0.0333	Bipolar
ENSRNOG00000003480	absent in melanoma 2	AIM2	1.844	0.0501
ENSRNOG00000003491	protein kinase C alpha	PRKCA	0.199	0.0168	Bipolar
ENSRNOG00000003494	protein tyrosine phosphatase, receptor type, f polypeptide (PTPRF), interacting protein (liprin), alpha 4	Ppfia4	0.364	0.00217	Amacrine
ENSRNOG00000003495	pre-mRNA processing factor 8	PRPF8	-0.117	0.0887	Bipolar
ENSRNOG00000003496	TBC1 domain family member 9	TBC1D9	-0.407	7e-08
ENSRNOG00000003497	THO complex subunit 6	THOC6	0.362	0.056	Muller
ENSRNOG00000003504	thrombospondin type 1 domain containing 8	Thsd8	0.086	0.545
ENSRNOG00000003506	golgi SNAP receptor complex member 2	GOSR2	-0.049	0.669
ENSRNOG00000003508	endoplasmic reticulum-golgi intermediate compartment 1	ERGIC1	0.181	0.227
ENSRNOG00000003510	flavin containing dimethylaniline monoxygenase 2	FMO2	2.835	0.000963	Vascular
ENSRNOG00000003512	gamma-aminobutyric acid type A receptor subunit alpha1	GABRA1	0.924	4.22e-21	Bipolar
ENSRNOG00000003515	epoxide hydrolase 1	EPHX1	0.963	0.000766
ENSRNOG00000003517	T-box transcription factor 2	Tbx2	0.75	4.92e-13
ENSRNOG00000003518	olfactory receptor family 6 subfamily K member 6	OR6K6	-0.308	0.673
ENSRNOG00000003520	peroxiredoxin 2	PRDX2	0.257	0.000142	RGCs
ENSRNOG00000003522	major histocompatibility complex, class I-related	MR1	0.707	0.139	Microglia
ENSRNOG00000003524	leucine rich repeat containing 59	LRRC59	-0.106	0.331
ENSRNOG00000003526	synaptotagmin like 4	SYTL4	-0.529	0.499
ENSRNOG00000003533	chloride voltage-gated channel 4	CLCN4	-0.436	7.34e-14
ENSRNOG00000003536	RUN and FYVE domain containing 1	RUFY1	0.165	0.0464
ENSRNOG00000003537	spectrin alpha, erythrocytic 1	SPTA1	-0.111
ENSRNOG00000003538	ADAM metallopeptidase with thrombospondin type 1 motif 4	ADAMTS4	1.176	1.07e-08	Vascular
ENSRNOG00000003541	protein geranylgeranyltransferase type I subunit beta	PGGT1B	-0.609	1.27e-08	Rods
ENSRNOG00000003542	host cell factor C1 regulator 1	HCFC1R1	0.221	0.0705	RGCs
ENSRNOG00000003543	G protein-coupled receptor 143	GPR143	0.251	0.727
ENSRNOG00000003544	T-box transcription factor 4	TBX4	2.175	0.0246
ENSRNOG00000003545	ubiquitin C-terminal hydrolase L5	UCHL5	-0.649	8.66e-09	Amacrine
ENSRNOG00000003546	TNF receptor superfamily member 12A	TNFRSF12A	1.14	4.08e-07	Muller
ENSRNOG00000003549	canopy FGF signaling regulator 2	CNPY2	-0.056	0.66	Muller
ENSRNOG00000003550	acyl-CoA binding domain containing 6	ACBD6	0.389	5.24e-05
ENSRNOG00000003551	beta-1,4-galactosyltransferase 3	B4GALT3	0.013	0.93
ENSRNOG00000003553	EGF containing fibulin extracellular matrix protein 1	EFEMP1	0.359	0.426	Muller
ENSRNOG00000003554	phosphatidylinositol glycan anchor biosynthesis class A	PIGA	-0.635	6.35e-05
ENSRNOG00000003559	coiled-coil domain containing 112	CCDC112	-0.245	0.0569
ENSRNOG00000003562	sushi domain containing 4	SUSD4	0.219	0.0274
ENSRNOG00000003563	bleomycin hydrolase	BLMH	-0.492	1.56e-11
ENSRNOG00000003567	protoporphyrinogen oxidase	PPOX	-0.42	0.000862	Bipolar
ENSRNOG00000003576	integrator complex subunit 2	INTS2	-0.296	0.00951	Bipolar
ENSRNOG00000003578	fem-1 homolog C	FEM1C	-0.384	5.76e-05
ENSRNOG00000003581	POU class 2 homeobox 1	POU2F1	-0.925	4.95e-08	Amacrine
ENSRNOG00000003583	SET and MYND domain containing 2	SMYD2	0.706	2.49e-16	RGCs
ENSRNOG00000003585	synaptotagmin like 5	SYTL5	-0.346	0.204
ENSRNOG00000003587	vascular endothelial growth factor D	VEGFD	0.408	0.507
ENSRNOG00000003590	target of myb1 like 2 membrane trafficking protein	TOM1L2	0.16	0.0548
ENSRNOG00000003592	mediator complex subunit 28	MED28	-0.064	0.673
ENSRNOG00000003594	transmembrane protein 183A	TMEM183A	-0.131	0.142	Amacrine
ENSRNOG00000003595	LIM homeobox 4	LHX4	0.591	2.05e-07	Bipolar
ENSRNOG00000003596	integrin subunit beta 1 binding protein 2	ITGB1BP2	-0.948	0.00349
ENSRNOG00000003597	tubulin alpha 4a	TUBA4A	0.031	0.766	RGCs
ENSRNOG00000003599	UTP3 small subunit processome component	UTP3	-0.65	1.53e-11	Rods
ENSRNOG00000003600	polyribonucleotide nucleotidyltransferase 1	PNPT1	-0.184	0.123
ENSRNOG00000003603	Rho GTPase activating protein 44	ARHGAP44	0.286	9.11e-05
ENSRNOG00000003606	similar to microsomal glutathione S-transferase 3	RGD1561381	0.231	0.78
ENSRNOG00000003611	dynein light chain Tctex-type 3	DYNLT3	0.007	0.966	RGCs
ENSRNOG00000003613	midline 1	MID1	0.307	0.0148
ENSRNOG00000003614	alpha-1,6-mannosylglycoprotein 6-beta-N-acetylglucosaminyltransferase	MGAT5	0.817	7.73e-09
ENSRNOG00000003616	gremlin 2, DAN family BMP antagonist	GREM2	0.764	5.37e-09	Bipolar
ENSRNOG00000003622	cytochrome b-245 beta chain	CYBB	2.043	0.0323	Microglia
ENSRNOG00000003625	UBX domain protein 4	UBXN4	-0.057	0.419	Rods
ENSRNOG00000003626	ATP synthase peripheral stalk subunit d	ATP5PD	-0.062	0.484
ENSRNOG00000003629	nuclear VCP like	NVL	-0.722	1.36e-11	Bipolar
ENSRNOG00000003633	recoverin	RCVRN	-2.22	1.78e-119	Rods
ENSRNOG00000003634	zinc finger protein 354A	ZNF354A	-0.532	0.00324	Microglia
ENSRNOG00000003635	dispatched RND transporter family member 1	DISP1	-0.144	0.157	Microglia
ENSRNOG00000003643	TGF-beta activated kinase 1 (MAP3K7) binding protein 3	TAB3	-0.62	0.00188	Vascular
ENSRNOG00000003648			1.181	0.192
ENSRNOG00000003649	quiescin sulfhydryl oxidase 1	QSOX1	1.21	4.45e-40
ENSRNOG00000003650	5', 3'-nucleotidase, cytosolic	NT5C	0.01	0.982
ENSRNOG00000003653	fumarate hydratase	FH	-0.048	0.682
ENSRNOG00000003654	claudin 6	CLDN6	2.101	2.08e-26
ENSRNOG00000003657	protein kinase, membrane associated tyrosine/threonine 1	PKMYT1	-0.129	0.78	Rods
ENSRNOG00000003661			0.023	0.863
ENSRNOG00000003666	joining chain of multimeric IgA and IgM	Jchain	0.236	0.75
ENSRNOG00000003669	myocardin	MYOCD	-0.02	0.965	Vascular
ENSRNOG00000003670			0.121	0.168
ENSRNOG00000003673	nucleoporin 85	NUP85	-0.481	1.54e-06	Bipolar
ENSRNOG00000003674	pirin	PIR	1.6	3.64e-29	Muller
ENSRNOG00000003675			0.078	0.713
ENSRNOG00000003679	mediator complex subunit 13	MED13	-0.578	2.04e-16
ENSRNOG00000003680	gamma-aminobutyric acid type A receptor subunit beta2	GABRB2	0.261	0.0566
ENSRNOG00000003682	hook microtubule tethering protein 2	HOOK2	0.067	0.666	Bipolar
ENSRNOG00000003683	glucagon like peptide 2 receptor	GLP2R	-1.167	7.14e-17
ENSRNOG00000003686	transducin beta like 1 X-linked	TBL1X	-0.191	0.00837	Muller
ENSRNOG00000003687	regulator of G protein signaling 2	RGS2	0.643	8.35e-08	Microglia
ENSRNOG00000003689	non-POU domain containing octamer binding	NONO	-0.42	4.49e-09
ENSRNOG00000003691	transmembrane p24 trafficking protein 7	TMED7	-0.017	0.896	Muller
ENSRNOG00000003694	prospero homeobox 1	PROX1	0.397	3.33e-05
ENSRNOG00000003695	MGAT4 family member D	MGAT4D	-2.317	2.83e-16
ENSRNOG00000003699	endonuclease V	Endov	-0.346	0.0316
ENSRNOG00000003703	minichromosome maintenance complex component 6	MCM6	0.402	0.0387
ENSRNOG00000003704	family with sequence similarity 184, member B	Fam184b	-0.544	4.13e-06
ENSRNOG00000003705	BMX non-receptor tyrosine kinase	BMX	2.451	9.14e-08	Vascular
ENSRNOG00000003706	ubiquitin-fold modifier conjugating enzyme 1	UFC1	0.033	0.792
ENSRNOG00000003707	zinc finger MYM-type containing 3	ZMYM3	0.253	0.0123
ENSRNOG00000003712	protein phosphatase 4 regulatory subunit 3B	PPP4R3B	-0.294	4.14e-06
ENSRNOG00000003714	CDC-like kinase 4	Clk4	-0.127	0.221	Bipolar
ENSRNOG00000003717	cornichon family AMPA receptor auxiliary protein 4	CNIH4	0.091	0.45
ENSRNOG00000003719	ATP synthase mitochondrial F1 complex assembly factor 2	ATPAF2	-0.173	0.0987	Cones
ENSRNOG00000003720	paired related homeobox 1	PRRX1	0.227	0.763	Vascular
ENSRNOG00000003721			-0.866	4.41e-13
ENSRNOG00000003723	WD repeat domain 26	WDR26	-0.202	0.0222
ENSRNOG00000003724	mitochondrial ribosomal protein L27	MRPL27	0.217	0.26
ENSRNOG00000003726	Scm polycomb group protein like 2	SCML2	0.427	0.169	Bipolar
ENSRNOG00000003728	xylosyltransferase 2	XYLT2	0.42	1.52e-05
ENSRNOG00000003732	fibronectin leucine rich transmembrane protein 2	FLRT2	0.448	0.00111
ENSRNOG00000003734	similar to CXXC finger 5	LOC681300	-0.538	0.535
ENSRNOG00000003736	collagen type V alpha 2 chain	COL5A2	0.182	0.526	Vascular
ENSRNOG00000003737	bestrophin 2	BEST2	-0.756
ENSRNOG00000003738	usherin	USH2A	-2.544	1.61e-232	Rods
ENSRNOG00000003741	neuronal pentraxin 1	NPTX1	0.796	2.19e-17
ENSRNOG00000003742	cyclin dependent kinase like 5	CDKL5	-0.413	0.0154	Horizontal
ENSRNOG00000003743	aspartyl-tRNA synthetase 1	DARS1	-0.076	0.32
ENSRNOG00000003745	activating transcription factor 3	ATF3	0.52	0.0419	Microglia
ENSRNOG00000003747	guided entry of tail-anchored proteins factor 3, ATPase	GET3	-0.046	0.709
ENSRNOG00000003749	X-linked Kx blood group antigen, Kell and VPS13A binding protein	XK	-0.155	0.524	RGCs
ENSRNOG00000003755	calmegin	CLGN	-1.256	1.05e-19	Muller
ENSRNOG00000003756	LanC like family member 3	LANCL3	0.325	0.266	RGCs
ENSRNOG00000003759	galactosylceramidase	GALC	-0.1	0.628
ENSRNOG00000003762	SWI/SNF related, matrix associated, actin dependent regulator of chromatin, subfamily a, member 1	SMARCA1	0.143	0.292
ENSRNOG00000003763	peroxiredoxin 4	PRDX4	0.219	0.272
ENSRNOG00000003767	ribosomal protein S6 kinase C1	RPS6KC1	-0.155	0.15	Bipolar
ENSRNOG00000003769	transmembrane protein 163	TMEM163	0.402	0.00893
ENSRNOG00000003772	cysteine and glycine rich protein 2	CSRP2	-0.026	0.867
ENSRNOG00000003773	heme oxygenase 2	HMOX2	0.015	0.876	RGCs
ENSRNOG00000003777	cholinergic receptor nicotinic epsilon subunit	CHRNE	-1.717	5.82e-10
ENSRNOG00000003778	opsin 3	OPN3	-0.275	0.449
ENSRNOG00000003779	death effector domain containing	DEDD	-0.129	0.315	Vascular
ENSRNOG00000003782	acyl-CoA thioesterase 9	ACOT9	0.552	2.13e-05
ENSRNOG00000003784	Rab interacting lysosomal protein	RILP	0.516	0.315	Amacrine
ENSRNOG00000003785	ubiquitin specific peptidase 43	USP43	1.235	0.11	Muller
ENSRNOG00000003786	tetraspanin 6	TSPAN6	0.133	0.493
ENSRNOG00000003787	ligand dependent nuclear receptor corepressor like	LCORL	-0.468	0.0872	Amacrine
ENSRNOG00000003792	mediator complex subunit 14	MED14	-0.206	0.0268	Microglia
ENSRNOG00000003794	NmrA like redox sensor 1	NMRAL1	0.239	0.163
ENSRNOG00000003795	angel homolog 2	ANGEL2	-0.13	0.118
ENSRNOG00000003797	mitochondrial ribosomal protein S7	MRPS7	0.062	0.705
ENSRNOG00000003800	regulator of G protein signaling 9	RGS9	-1.638	2.49e-136	Rods
ENSRNOG00000003802	PTTG1 regulator of sister chromatid separation, securin	PTTG1	0.992	0.32
ENSRNOG00000003803	zinc finger DHHC-type palmitoyltransferase 17	ZDHHC17	-0.402	1.59e-06
ENSRNOG00000003805	ring finger protein, transmembrane 1	RNFT1	-0.068	0.725
ENSRNOG00000003807	Wnt family member 9B	WNT9B	0.483	0.0474
ENSRNOG00000003809	spermidine/spermine N1-acetyltransferase 1	SAT1	0.538	0.000174
ENSRNOG00000003812	neuroligin 3	NLGN3	0.415	1.02e-07
ENSRNOG00000003813	potassium two pore domain channel subfamily K member 10	KCNK10	0.17	0.73
ENSRNOG00000003815	solute carrier family 25 member 11	SLC25A11	-0.15	0.0304
ENSRNOG00000003816	transcriptional adaptor 1	TADA1	0.015	0.914	Muller
ENSRNOG00000003821	regulatory associated protein of MTOR complex 1	RPTOR	-0.261	0.00239
ENSRNOG00000003822	SLU7 homolog, splicing factor	SLU7	-0.208	0.00554
ENSRNOG00000003825	WD repeat domain 75	WDR75	-0.265	0.0143	Microglia
ENSRNOG00000003827	WD repeat domain, phosphoinositide interacting 1	WIPI1	-1.041	4.16e-36
ENSRNOG00000003829	adaptor related protein complex 3 subunit sigma 1	AP3S1	-0.27	0.0232	Bipolar
ENSRNOG00000003831	tyrosyl-DNA phosphodiesterase 1	TDP1	0.271	0.141
ENSRNOG00000003832	vasohibin 2	VASH2	0.113	0.646	Amacrine
ENSRNOG00000003833	neudesin neurotrophic factor	NENF	0.505	0.0115	Muller
ENSRNOG00000003834	mitogen-activated protein kinase kinase 4	MAP2K4	0.104	0.471
ENSRNOG00000003835	solute carrier family 43 member 2	SLC43A2	0.284	0.000909
ENSRNOG00000003837			-0.727	6.15e-12
ENSRNOG00000003840	slit guidance ligand 2	SLIT2	0.591	6.86e-07	Bipolar
ENSRNOG00000003841	potassium voltage-gated channel subfamily H member 1	KCNH1	0.432	0.0769
ENSRNOG00000003844	DEAH-box helicase 15	DHX15	-0.219	0.0193
ENSRNOG00000003845	Wnt family member 3	WNT3	0.254	0.693
ENSRNOG00000003846	phosphatidylinositol transfer protein alpha	PITPNA	0.292	8.18e-06
ENSRNOG00000003847			-0.347	0.000147
ENSRNOG00000003848	mediator complex subunit 12	MED12	-0.225	0.00066
ENSRNOG00000003849	syntaxin 8	STX8	0.186	0.278	Muller
ENSRNOG00000003853	short coiled-coil protein	SCOC	0.252	0.00199
ENSRNOG00000003855	DnaJ heat shock protein family (Hsp40) member A3	DNAJA3	-0.107	0.224
ENSRNOG00000003858	ATPase H+ transporting accessory protein 2	ATP6AP2	0.151	0.0154	Amacrine
ENSRNOG00000003861	golgin, RAB6 interacting	GORAB	-0.088	0.544
ENSRNOG00000003863	telomerase RNA component interacting RNase	TRIR	0.117	0.275
ENSRNOG00000003864	GIPC PDZ domain containing family member 1	GIPC1	-0.161	0.174	Vascular
ENSRNOG00000003866	C-X-C motif chemokine receptor 4	CXCR4	-1.164	0.0217	Microglia
ENSRNOG00000003869	superoxide dismutase 3	SOD3	0.651	0.707	Vascular
ENSRNOG00000003870	C1q and TNF related 2	C1QTNF2	-0.276	0.594
ENSRNOG00000003872	solute carrier family 40 member 1	SLC40A1	-0.442	0.596	Rods
ENSRNOG00000003873	carboxypeptidase D	CPD	-0.437	0.000457
ENSRNOG00000003875	OCRL inositol polyphosphate-5-phosphatase	OCRL	-0.164	0.16
ENSRNOG00000003878	thrombospondin type 1 domain containing 7B	THSD7B	-0.108	0.587	Horizontal
ENSRNOG00000003879	ring finger protein 167	RNF167	0.055	0.531	Bipolar
ENSRNOG00000003880	tryptophan hydroxylase 2	TPH2	0.782	0.0375
ENSRNOG00000003881	nitrilase 1	NIT1	-0.173	0.0916	Amacrine
ENSRNOG00000003882	centrosomal protein 350	CEP350	-0.764	1.25e-34
ENSRNOG00000003887			0.911	2.42e-13
ENSRNOG00000003888	regulator of G protein signaling 13	RGS13	0.391	0.202	Amacrine
ENSRNOG00000003889	TBC1 domain family member 15	TBC1D15	-0.321	0.00114
ENSRNOG00000003890	nucleosome assembly protein 1 like 1	NAP1L1	-0.359	1.55e-08
ENSRNOG00000003891			3.457	9.38e-30
ENSRNOG00000003893	cyclin J-like	Ccnjl	0.527	0.0224
ENSRNOG00000003895	regulator of G protein signaling 1	RGS1	3.388	0.00015	Microglia
ENSRNOG00000003897	collagen type I alpha 1 chain	COL1A1	0.042	0.974	Muller
ENSRNOG00000003899			-0.636	0.463
ENSRNOG00000003901	cilia and flagella associated protein 36	CFAP36	-0.381	3.53e-06	Muller
ENSRNOG00000003905	N-ethylmaleimide sensitive factor, vesicle fusing ATPase	NSF	0.272	0.000236	Bipolar
ENSRNOG00000003908	centrosomal protein 128	Cep128	-1.159	2.01e-23	Bipolar
ENSRNOG00000003915	proton activated chloride channel 1	PACC1	0.039	0.88
ENSRNOG00000003917	uridine-cytidine kinase 2	UCK2	-0.066	0.752
ENSRNOG00000003918	solute carrier family 25 member 19	SLC25A19	-0.128	0.529	Microglia
ENSRNOG00000003919	ribosomal protein S6 kinase B1	RPS6KB1	-0.37	9.78e-06	Muller
ENSRNOG00000003923	RAB21, member RAS oncogene family	RAB21	0.409	3.58e-05
ENSRNOG00000003924	phosphatidylinositol 4-kinase type 2 beta	PI4K2B	0.266	0.325	Microglia
ENSRNOG00000003925	hedgehog acyltransferase	HHAT	0.422	0.479	Muller
ENSRNOG00000003927	CD55 molecule (Cromer blood group)	CD55	0.107	0.892
ENSRNOG00000003928	transmembrane and coiled-coil domains 1	TMCO1	0.129	0.392	Muller
ENSRNOG00000003929	protocadherin 19	PCDH19	0.383	0.0388
ENSRNOG00000003931	arylsulfatase G	ARSG	0.314	4.71e-05	Rods
ENSRNOG00000003936	PWWP domain containing 2A	Pwwp2a	-0.436	1.32e-05
ENSRNOG00000003942	asparagine synthetase domain containing 1	ASNSD1	-0.248	0.0334	Muller
ENSRNOG00000003946	torsin 1A interacting protein 1	TOR1AIP1	-0.093	0.516
ENSRNOG00000003947	netrin 1	NTN1	1.156	0.0792	Bipolar
ENSRNOG00000003948	LLGL scribble cell polarity complex component 1	LLGL1	0.274	0.00955
ENSRNOG00000003949	phosphorylase kinase regulatory subunit alpha 2	PHKA2	0.525	0.284	Muller
ENSRNOG00000003950	laeverin	LVRN	-1.205	0.00708
ENSRNOG00000003951	proteasome 26S subunit, ATPase 1	PSMC1	-0.057	0.454
ENSRNOG00000003953	RAB3 GTPase activating protein catalytic subunit 1	Rab3gap1	0.006	0.954	Bipolar
ENSRNOG00000003954			1.817	0.00127
ENSRNOG00000003955	spermatogenesis associated 7	SPATA7	-0.677	6.06e-11	Bipolar
ENSRNOG00000003956	Rho GTPase activating protein 6	ARHGAP6	0.191	0.818	Muller
ENSRNOG00000003958	COMM domain containing 10	COMMD10	0.266	0.0334	Muller
ENSRNOG00000003960	collectrin, amino acid transport regulator	CLTRN	-0.047	0.927
ENSRNOG00000003964	NSE2 (MMS21) homolog, SMC5-SMC6 complex SUMO ligase	NSMCE2	-0.202	0.171	Bipolar
ENSRNOG00000003967	vacuole membrane protein 1	VMP1	-0.314	0.00133
ENSRNOG00000003969	FAM20A golgi associated secretory pathway pseudokinase	FAM20A	0.184	0.865
ENSRNOG00000003970	transportin 2	TNPO2	-0.166	0.0025
ENSRNOG00000003971	golgi SNAP receptor complex member 1	GOSR1	-0.141	0.0897
ENSRNOG00000003972	thyroid stimulating hormone receptor	TSHR	1.229	8.92e-19
ENSRNOG00000003973	cytochrome b5 reductase 1	CYB5R1	-0.25	0.215	Muller
ENSRNOG00000003975	profilin 1	PFN1	0.5	1.71e-11
ENSRNOG00000003977			-0.784	5.87e-10
ENSRNOG00000003979	zinc finger RANBP2-type containing 3	ZRANB3	-0.443	0.00615	Bipolar
ENSRNOG00000003980	tetratricopeptide repeat domain 1	TTC1	-0.186	0.0358	Muller
ENSRNOG00000003981	zinc finger protein 18	ZNF18	-0.265	0.0999
ENSRNOG00000003983			0.252	0.012
ENSRNOG00000003984	apelin	APLN	-1.164	1.7e-06	Muller
ENSRNOG00000003985	transmembrane protein 19	TMEM19	-0.086	0.633
ENSRNOG00000003988	DnaJ heat shock protein family (Hsp40) member C27	DNAJC27	0.137	0.0146
ENSRNOG00000003990	growth factor receptor bound protein 2	GRB2	0.349	1.17e-05	Microglia
ENSRNOG00000003991	ankyrin and armadillo repeat containing	ANKAR	0.393	0.593	Rods
ENSRNOG00000003992	phosphoinositide-3-kinase regulatory subunit 6	PIK3R6	0.944	0.0617
ENSRNOG00000003993			-0.186	0.363
ENSRNOG00000003997	phospholipase D family member 5	PLD5	0.154	0.792	Vascular
ENSRNOG00000003998	sarcoglycan alpha	SGCA	-0.251	0.697	Vascular
ENSRNOG00000003999	adenylate cyclase 3	ADCY3	0.524	8.85e-06
ENSRNOG00000004000	transcription elongation factor, mitochondrial	TEFM	-0.306	0.0827
ENSRNOG00000004001	O-sialoglycoprotein endopeptidase like 1	OSGEPL1	-0.041	0.867
ENSRNOG00000004003	dual specificity phosphatase 10	DUSP10	0.716	5.93e-07	Rods
ENSRNOG00000004004	NRDE-2, necessary for RNA interference, domain containing	NRDE2	-0.513	1.92e-08
ENSRNOG00000004006	DnaJ heat shock protein family (Hsp40) member B9	DNAJB9	0.27	0.0135
ENSRNOG00000004009	X-prolyl aminopeptidase 2	XPNPEP2	-0.828	0.267
ENSRNOG00000004011	NEDD1 gamma-tubulin ring complex targeting factor	NEDD1	-0.067	0.769
ENSRNOG00000004013	glutamate receptor interacting protein 1	GRIP1	0.356	1.49e-05
ENSRNOG00000004014	charged multivesicular body protein 6	CHMP6	-0.178	0.144
ENSRNOG00000004016	MSL complex subunit 3	MSL3	-0.443	1.18e-05	Microglia
ENSRNOG00000004018	tudor domain containing 5	TDRD5	0.517	0.43	Muller
ENSRNOG00000004019	pleckstrin homology like domain family A member 1	PHLDA1	0.96	1.6e-20	Muller
ENSRNOG00000004022	kelch domain containing 9	KLHDC9	0.377	0.323
ENSRNOG00000004026	ATPase plasma membrane Ca2+ transporting 1	ATP2B1	0.06	0.281
ENSRNOG00000004027	aldehyde dehydrogenase 9 family member A1	ALDH9A1	0.251	0.0183	Muller
ENSRNOG00000004032	transmembrane protein 94	Tmem94	0.064	0.524	Bipolar
ENSRNOG00000004033	semaphorin 6A	SEMA6A	0.436	1.63e-05
ENSRNOG00000004035	KRR1 small subunit processome component homolog	KRR1	-0.325	0.00384
ENSRNOG00000004036	sorting nexin 12	SNX12	-0.202	0.0335
ENSRNOG00000004040	ATP binding cassette subfamily A member 8	ABCA8	-0.027	0.906	Muller
ENSRNOG00000004048	leucine rich repeat kinase 2	LRRK2	0.537	0.000222
ENSRNOG00000004049	BAR/IMD domain containing adaptor protein 2	BAIAP2	0.641	1.29e-06
ENSRNOG00000004050	SNF related kinase	SNRK	-0.837	3.84e-22	Vascular
ENSRNOG00000004057	coiled-coil domain containing 88A	CCDC88A	-0.334	0.00241
ENSRNOG00000004059	peptidyl-tRNA hydrolase domain containing 1	PTRHD1	0.177	0.571	Muller
ENSRNOG00000004060	calmodulin 1	Calm1 (includes others)	0.538	8.46e-31
ENSRNOG00000004061	pinin, desmosome associated protein	PNN	-0.375	0.000736
ENSRNOG00000004062	complement component 4 binding protein alpha	C4BPA	-1.044	0.309
ENSRNOG00000004063	SH3 and PX domains 2B	SH3PXD2B	0.664	0.00509	Muller
ENSRNOG00000004067	neuronal cell adhesion molecule	NRCAM	0.459	2.59e-10
ENSRNOG00000004068	nuclear receptor coactivator 1	NCOA1	-0.187	0.0091
ENSRNOG00000004072	myosin IC	MYO1C	0.179	0.177	Vascular
ENSRNOG00000004076	PMS1 homolog 1, mismatch repair system component	PMS1	-0.047	0.773	Bipolar
ENSRNOG00000004077	potassium voltage-gated channel subfamily C member 2	KCNC2	0.472	1.41e-07	RGCs
ENSRNOG00000004078	enolase 3	ENO3	-0.175	0.383	Bipolar
ENSRNOG00000004083	zinc finger CCCH-type containing 14	ZC3H14	-0.485	1.9e-14	Bipolar
ENSRNOG00000004084	LRAT domain containing 1	LRATD1	-0.205	0.648
ENSRNOG00000004085	T cell activation inhibitor, mitochondrial	TCAIM	-0.049	0.702
ENSRNOG00000004089	ectonucleotide pyrophosphatase/phosphodiesterase 2	ENPP2	0.677
ENSRNOG00000004090	protein arginine methyltransferase 1-like	LOC100361025	0.072	0.721
ENSRNOG00000004091	CWC25 spliceosome associated protein homolog	CWC25	-0.735	4.07e-18
ENSRNOG00000004092	similar to microfibrillar-associated protein 1	RGD1564148	2	0.0533
ENSRNOG00000004093			-0.923	7.08e-36
ENSRNOG00000004094	prostaglandin E receptor 1	PTGER1	-0.332	0.00248	Amacrine
ENSRNOG00000004099	R3H domain containing 1	R3HDM1	-0.177	0.0192
ENSRNOG00000004100	tribbles pseudokinase 1	TRIB1	-0.482	0.00175
ENSRNOG00000004101			0.543	0.634
ENSRNOG00000004103	trafficking protein particle complex subunit 6B	TRAPPC6B	0.036	0.77
ENSRNOG00000004104	zinc finger with KRAB and SCAN domains 7	ZKSCAN7	-0.433	0.00139
ENSRNOG00000004107	ribosomal protein L23	RPL23	-0.042	0.696	Muller
ENSRNOG00000004109	zinc finger protein, FOG family member 2	ZFPM2	0.373	0.0079	Horizontal
ENSRNOG00000004110	tribbles pseudokinase 2	Trib2	-0.876	5.14e-48	Bipolar
ENSRNOG00000004111	sterol O-acyltransferase 1	SOAT1	0.68	0.00511	Microglia
ENSRNOG00000004112	chromosome 5 open reading frame 52	C5orf52	0.024	0.975
ENSRNOG00000004118	FERM and PDZ domain containing 4	FRMPD4	0.528	0.0132	Horizontal
ENSRNOG00000004120	ring finger protein 138, retrogene 1	Rnf138rt1	-0.261	0.786
ENSRNOG00000004122	kringle containing transmembrane protein 2	KREMEN2	-0.501	0.581
ENSRNOG00000004125	complement component 4 binding protein beta	C4BPB	-0.169	0.576
ENSRNOG00000004127	centrosomal protein 170	CEP170	-0.083	0.458
ENSRNOG00000004130	anaphase promoting complex subunit 4	ANAPC4	-0.192	0.0461
ENSRNOG00000004131	protein kinase N1	PKN1	0.015	0.893
ENSRNOG00000004132	LIM and SH3 protein 1	LASP1	0.555	1.16e-10
ENSRNOG00000004133	solute carrier family 7 member 3	SLC7A3	0.167	0.296	Muller
ENSRNOG00000004135	KIAA1143	KIAA1143	-0.203	0.239
ENSRNOG00000004137	ubiquitin domain containing 2	UBTD2	0.01	0.959
ENSRNOG00000004139	nudE neurodevelopment protein 1 like 1	NDEL1	0.011	0.937	Bipolar
ENSRNOG00000004140	parkin coregulated like	PACRGL	-0.212	0.31	Muller
ENSRNOG00000004141	vasorin	VASN	0.54	6.18e-05	Muller
ENSRNOG00000004143	adiponectin receptor 1	ADIPOR1	-1.646	4.55e-140	Bipolar
ENSRNOG00000004144			-0.288	0.608
ENSRNOG00000004145	prolyl-tRNA synthetase domain containing 1	Prorsd1	-0.68	0.0031
ENSRNOG00000004146	coronin 7	CORO7/CORO7-PAM16	-0.453	1.18e-08
ENSRNOG00000004147	ATP-binding cassette, sub-family A member 8a	Abca8a	-0.03	0.895	Muller
ENSRNOG00000004148	cyclin dependent kinase 17	CDK17	0.503	3.16e-09	Muller
ENSRNOG00000004149	MGAT4 family member C	MGAT4C	0.235	0.341	Bipolar
ENSRNOG00000004150	solute carrier family 9 member A7	Slc9a7	-0.042	0.807	Amacrine
ENSRNOG00000004152	LDL receptor related protein 12	LRP12	-0.071	0.494
ENSRNOG00000004155	sterile alpha motif domain containing 14	SAMD14	0.475	8.3e-09	Amacrine
ENSRNOG00000004158	histone deacetylase 9	HDAC9	-0.528	3.28e-08
ENSRNOG00000004159	FLII actin remodeling protein	FLII	-0.008	0.939
ENSRNOG00000004160	phosphoribosyl pyrophosphate synthetase 2	PRPS2	0.615	0.00932	Microglia
ENSRNOG00000004161	mitochondrial translational initiation factor 2	MTIF2	-0.409	0.000272
ENSRNOG00000004162	6-phosphofructo-2-kinase/fructose-2,6-biphosphatase 2	PFKFB2	-1.39	5.08e-70	Rods
ENSRNOG00000004165	protein kinase D1	PRKD1	-0.562	2.71e-06	Muller
ENSRNOG00000004168	solute carrier family 35 member E4	SLC35E4	-0.425	0.000455	Muller
ENSRNOG00000004169	fizzy and cell division cycle 20 related 1	FZR1	0.1	0.387	Horizontal
ENSRNOG00000004171	dynein axonemal heavy chain 9	DNAH9	0.291	0.168	Rods
ENSRNOG00000004172	pyruvate dehydrogenase kinase 2	PDK2	0.468	6.33e-07	Amacrine
ENSRNOG00000004177	myosin IA	MYO1A	-0.053	0.959
ENSRNOG00000004179	neurotensin	NTS	0.94	0.197
ENSRNOG00000004180			0.577	0.000569
ENSRNOG00000004181	SHH signaling and ciliogenesis regulator SDCCAG8	SDCCAG8	-0.588	7.31e-05
ENSRNOG00000004183	coiled-coil domain containing 59	CCDC59	-0.178	0.22
ENSRNOG00000004185	MON2 homolog, regulator of endosome-to-Golgi trafficking	MON2	-0.333	2.8e-07
ENSRNOG00000004186	sorting nexin 13	SNX13	-0.333	0.00011
ENSRNOG00000004188	stratifin like 1	Sfnl1	-0.757	0.553
ENSRNOG00000004189	DNA helicase B	HELB	0.124	0.214	Muller
ENSRNOG00000004192	Rho GTPase activating protein 30	ARHGAP30	2.066	1.18e-05	Microglia
ENSRNOG00000004193	kelch like family member 12	KLHL12	-0.607	3.55e-10	Amacrine
ENSRNOG00000004196	ribosomal protein S29	RPS29	0.092	0.49
ENSRNOG00000004198	syntaxin binding protein 6	STXBP6	0.368	0.058	Muller
ENSRNOG00000004200	syntabulin	SYBU	0.369	3.4e-07
ENSRNOG00000004201	regulating synaptic membrane exocytosis 2	RIMS2	-1.226	3.78e-89
ENSRNOG00000004205	protein kinase domain containing, cytoplasmic	PKDCC	0.151	0.526	Rods
ENSRNOG00000004206	glutaredoxin 5	GLRX5	-0.289	0.0492	Muller
ENSRNOG00000004207	EMAP like 5	EML5	-0.795	2.3e-21	Bipolar
ENSRNOG00000004208	cysteine rich transmembrane BMP regulator 1	CRIM1	-0.024	0.983
ENSRNOG00000004212	F-box and WD repeat domain containing 9	FBXW9	-0.88	3.33e-12	Rods
ENSRNOG00000004214	ribosomal protein L26	RPL26	-0.208	0.0335	Microglia
ENSRNOG00000004217	serine/threonine kinase 10	STK10	0.791	4.6e-06	Microglia
ENSRNOG00000004218	kelch like family member 28	KLHL28	-0.344	0.042
ENSRNOG00000004219	deoxyhypusine synthase	DHPS	-0.339	0.000279
ENSRNOG00000004220	estrogen receptor binding site associated antigen 9	EBAG9	0.265	0.00625	Amacrine
ENSRNOG00000004221	leucine rich repeat containing G protein-coupled receptor 5	LGR5	0.407	0.000713
ENSRNOG00000004226	interleukin 1 receptor associated kinase 3	IRAK3	0.968	4.03e-07
ENSRNOG00000004229	tachykinin precursor 3	TAC3	-0.272	0.251
ENSRNOG00000004232	G2/M-phase specific E3 ubiquitin protein ligase	G2E3	-0.698	5.5e-08	Bipolar
ENSRNOG00000004234	alpha-1,6-mannosyl-glycoprotein 2-beta-N-acetylglucosaminyltransferase	MGAT2	-0.091	0.525
ENSRNOG00000004239	ST13, Hsp70 interacting protein, pseudogene 2	St13-ps2	0.121	0.809
ENSRNOG00000004242	DNA polymerase epsilon 2, accessory subunit	POLE2	-0.61	0.131
ENSRNOG00000004245	microsomal glutathione S-transferase 3	MGST3	0.708	1.18e-06	RGCs
ENSRNOG00000004246	sperm associated antigen 7	SPAG7	-0.294	0.00845
ENSRNOG00000004249	toll like receptor 7	TLR7	1.144	0.000216	Microglia
ENSRNOG00000004252	eukaryotic translation initiation factor 3 subunit H	EIF3H	-0.131	0.284	Microglia
ENSRNOG00000004255	thiosulfate sulfurtransferase like domain containing 1	TSTD1	0.152	0.131	Muller
ENSRNOG00000004257	CTP synthase 2	CTPS2	0.44	4.93e-07
ENSRNOG00000004258	carbohydrate sulfotransferase 7	CHST7	0.434	0.631	Muller
ENSRNOG00000004259	deoxyhypusine hydroxylase	DOHH	-0.031	0.846	RGCs
ENSRNOG00000004262	nuclear casein kinase and cyclin dependent kinase substrate 1	NUCKS1	0.082	0.887
ENSRNOG00000004263	integrator complex subunit 7	INTS7	-0.109	0.26	Bipolar
ENSRNOG00000004265	divergent protein kinase domain 2B	DIPK2B	-0.616	0.486
ENSRNOG00000004268	zinc finger protein 519	ZNF519	-0.503	5.97e-05	Bipolar
ENSRNOG00000004269	myelin transcription factor 1 like	MYT1L	0.428	1.27e-06
ENSRNOG00000004273	interferon induced transmembrane protein 1	Ifitm1	1.31	0.0938	Vascular
ENSRNOG00000004275	EGF like domain multiple 6	EGFL6	0.111	0.575
ENSRNOG00000004276	integrin subunit alpha 3	ITGA3	0.44	2.48e-08
ENSRNOG00000004278	distal-less homeobox 3	DLX3	0.472	0.515
ENSRNOG00000004279	adhesion G protein-coupled receptor A3	ADGRA3	0.351	0.119
ENSRNOG00000004280	transcobalamin 2	TCN2	-0.837	1.19e-13
ENSRNOG00000004281	cordon-bleu WH2 repeat protein	COBL	0.912	2.9e-12	Muller
ENSRNOG00000004282			-0.503	0.00325
ENSRNOG00000004283	calmodulin binding transcription activator 2	CAMTA2	0.022	0.863	Amacrine
ENSRNOG00000004284	BTG anti-proliferation factor 1	BTG1	-0.02	0.894
ENSRNOG00000004287	WD repeat domain 83	WDR83	-0.278	0.0333
ENSRNOG00000004288	peptidyl-tRNA hydrolase 2	PTRH2	-0.571	1.94e-06
ENSRNOG00000004290	growth factor receptor bound protein 10	GRB10	-0.199	0.0168	Rods
ENSRNOG00000004291	clathrin heavy chain	CLTC	0.053	0.387
ENSRNOG00000004292	serine palmitoyltransferase small subunit A	SPTSSA	0.329	0.000916	Bipolar
ENSRNOG00000004294	achaete-scute family bHLH transcription factor 1	ASCL1	0.763	0.183
ENSRNOG00000004300	general transcription factor IIA subunit 1	GTF2A1	0.085	0.507	Rods
ENSRNOG00000004301	DDB1 and CUL4 associated factor 13	DCAF13	-0.211	0.0526
ENSRNOG00000004302	phenylalanine hydroxylase	PAH	-0.178	0.837	Muller
ENSRNOG00000004303	TIMP metallopeptidase inhibitor 3	TIMP3	0.169	0.726
ENSRNOG00000004304	synapse associated protein 1	SYAP1	0.047	0.741
ENSRNOG00000004305	ABL proto-oncogene 2, non-receptor tyrosine kinase	ABL2	-0.323	0.00129	Bipolar
ENSRNOG00000004306	zinc finger and BTB domain containing 39	ZBTB39	-0.52	6.91e-08
ENSRNOG00000004307	torsin family 3 member A	TOR3A	1.026	4.01e-05	Microglia
ENSRNOG00000004310	CASK interacting protein 2	CASKIN2	-0.308	0.0304	Muller
ENSRNOG00000004311	G protein-coupled receptor 182	GPR182	-0.822	0.000105
ENSRNOG00000004312	transmembrane BAX inhibitor motif containing 4	TMBIM4	-0.03	0.851	Muller
ENSRNOG00000004314	protein phosphatase, Mg2+/Mn2+ dependent 1H	PPM1H	0.44	1.72e-08	Cones
ENSRNOG00000004316	LLP homolog, long-term synaptic facilitation factor	LLPH	-0.352	0.503	Microglia
ENSRNOG00000004317	vasoactive intestinal peptide receptor 2	VIPR2	0.469	1.56e-06	Muller
ENSRNOG00000004320	transglutaminase 4	TGM4	0.937	0.122
ENSRNOG00000004322	SH3 domain containing kinase binding protein 1	SH3KBP1	0.045	0.727	Microglia
ENSRNOG00000004327	dopa decarboxylase	DDC	-0.112	0.831	Rods
ENSRNOG00000004328	DEP domain containing MTOR interacting protein	DEPTOR	-0.576	0.0188	Muller
ENSRNOG00000004330	chordin like 1	CHRDL1	0.547	2.89e-06	Muller
ENSRNOG00000004332	epidermal growth factor receptor	EGFR	0.333	0.0436	Muller
ENSRNOG00000004333	FLYWCH-type zinc finger 1	FLYWCH1	0.411	3.42e-08
ENSRNOG00000004337	FAM20B glycosaminoglycan xylosylkinase	FAM20B	-0.103	0.328
ENSRNOG00000004339	YY1 transcription factor	YY1	-0.167	0.0841
ENSRNOG00000004341	chromosome 1 open reading frame 116	C1orf116	0.836	0.331
ENSRNOG00000004342	aryl hydrocarbon receptor	AHR	-0.037	0.827	Rods
ENSRNOG00000004344	zinc finger DHHC-type palmitoyltransferase 3	ZDHHC3	-0.065	0.462	RGCs
ENSRNOG00000004345	dishevelled associated activator of morphogenesis 1	DAAM1	-0.185	0.0753
ENSRNOG00000004346	notch receptor 3	NOTCH3	0.19	0.307	Vascular
ENSRNOG00000004351	solute carrier family 25 member 29	SLC25A29	-0.586	0.000173	Rods
ENSRNOG00000004353	PTPRF interacting protein alpha 2	PPFIA2	-0.196	0.00526
ENSRNOG00000004359	tryptophanyl-tRNA synthetase 1	WARS1	0.207	0.0698
ENSRNOG00000004360	gem nuclear organelle associated protein 2	GEMIN2	-0.475	0.000161
ENSRNOG00000004361	poly(ADP-ribose) polymerase family member 10	PARP10	0.453	0.153
ENSRNOG00000004362	ribosomal protein S6 kinase A5	Rps6ka5	0.148	0.118	Bipolar
ENSRNOG00000004364	BRISC and BRCA1 A complex member 2	BABAM2	0.215	0.0311
ENSRNOG00000004367	ETS transcription factor ELK3	ELK3	1.231	8.48e-10
ENSRNOG00000004372	cerebellin 4 precursor	CBLN4	0.055	0.821	Amacrine
ENSRNOG00000004373	DExD-box helicase 39A	DDX39A	-0.05	0.751
ENSRNOG00000004377	lipin 1	LPIN1	-0.219	0.0124
ENSRNOG00000004378	ATP binding cassette subfamily A member 5	ABCA5	0.187	0.0797	Bipolar
ENSRNOG00000004382	apoptosis resistant E3 ubiquitin protein ligase 1	AREL1	-0.137	0.0484	Amacrine
ENSRNOG00000004387			0.354	0.157
ENSRNOG00000004392	apoptosis associated tyrosine kinase	AATK	0.646	2.77e-13	Bipolar
ENSRNOG00000004395	F-box and WD repeat domain containing 11	Fbxw11	0.334	8.31e-06	Vascular
ENSRNOG00000004398	PKHD1 like 1	PKHD1L1	-1.03	0.404	Vascular
ENSRNOG00000004399	distal-less homeobox 4	DLX4	1.035	0.13
ENSRNOG00000004400	arginine vasopressin receptor 1A	AVPR1A	-0.706	0.437	Muller
ENSRNOG00000004401	mitochondrial ribosomal protein L13	MRPL13	0.044	0.789
ENSRNOG00000004402	lysophosphatidylglycerol acyltransferase 1	LPGAT1	-0.494	3.19e-12	Bipolar
ENSRNOG00000004403	solute carrier family 25 member 32	SLC25A32	-0.199	0.204
ENSRNOG00000004405	polymeric immunoglobulin receptor	PIGR	1.561	0.17
ENSRNOG00000004409	SAM and SH3 domain containing 3	SASH3	1.422	0.00891	Microglia
ENSRNOG00000004410	paired box 6	PAX6	0.552	3.28e-22	Amacrine
ENSRNOG00000004411	tetraspanin 8	TSPAN8	-0.542	0.375	Muller
ENSRNOG00000004412	MDM2 binding protein	MTBP	-0.827	0.000491
ENSRNOG00000004414	F11 receptor	F11R	0.37	0.314
ENSRNOG00000004415	TOG array regulator of axonemal microtubules 1	TOGARAM1	-0.669	7.14e-16
ENSRNOG00000004417	family with sequence similarity 117 member A	FAM117A	0.721	8.08e-07	Bipolar
ENSRNOG00000004420	RAD21 cohesin complex component	RAD21	-0.165	0.00142
ENSRNOG00000004421	ribitol xylosyltransferase 1	RXYLT1	0.063	0.736
ENSRNOG00000004423	zinc finger and BTB domain containing 18	ZBTB18	-0.717	2.84e-19	Muller
ENSRNOG00000004424	RAB interacting factor	RABIF	0.243	0.195
ENSRNOG00000004425	kelch domain containing 1	KLHDC1	0.009	0.964	Muller
ENSRNOG00000004426	ribosomal protein S27a	RPS27A	0.13	0.181	Microglia
ENSRNOG00000004430	centrosomal protein 131	CEP131	-0.223	0.0461	Vascular
ENSRNOG00000004437	mitogen-activated protein kinase kinase 6	MAP2K6	-0.003	0.986	Muller
ENSRNOG00000004438	contactin 1	CNTN1	0.607	3.02e-16
ENSRNOG00000004440	fidgetin like 1	FIGNL1	-0.771	0.0712	Bipolar
ENSRNOG00000004442	D-glutamate cyclase	DGLUCY	0.245	0.402
ENSRNOG00000004444	IKAROS family zinc finger 1	Ikzf1	2.336	2.62e-06	Microglia
ENSRNOG00000004448	acyl-CoA synthetase short chain family member 3	ACSS3	0.316	0.064	Muller
ENSRNOG00000004449	E2F transcription factor 6	E2F6	0.16	0.0807	Bipolar
ENSRNOG00000004453			-0.144	0.883
ENSRNOG00000004458	stonin 2	STON2	0.067	0.727	Muller
ENSRNOG00000004461	FLYWCH family member 2	FLYWCH2	0.151	0.551	RGCs
ENSRNOG00000004464	SEL1L adaptor subunit of SYVN1 ubiquitin ligase	SEL1L	-0.497	2.9e-17
ENSRNOG00000004466	family with sequence similarity 210 member B	FAM210B	0.384	0.0858
ENSRNOG00000004471	RNA polymerase III subunit H	POLR3H	-0.49	0.000325	Muller
ENSRNOG00000004473	PPARG coactivator 1 alpha	PPARGC1A	-1.299	2.6e-32	Amacrine
ENSRNOG00000004474	kelch domain containing 2	KLHDC2	-0.095	0.163
ENSRNOG00000004476	WNT inhibitory factor 1	WIF1	-1.072	0.000242	Muller
ENSRNOG00000004477	ubiquitin like domain containing CTD phosphatase 1	UBLCP1	-0.433	4.49e-05	Amacrine
ENSRNOG00000004479	aurora kinase A	AURKA	-0.126	0.725
ENSRNOG00000004481	adenylosuccinate synthase 2	ADSS2	0.527	5.03e-11
ENSRNOG00000004482	coiled-coil domain containing 88C	CCDC88C	0.531	0.011	Muller
ENSRNOG00000004483	protein tyrosine phosphatase receptor type R	PTPRR	0.208	0.205
ENSRNOG00000004487	NIMA-related kinase 2	Nek2	-1.337	0.000505
ENSRNOG00000004489	adhesion G protein-coupled receptor E5	ADGRE5	0.827	0.0126
ENSRNOG00000004492	mitochondrial transcription termination factor 3	MTERF3	0.091	0.599
ENSRNOG00000004493	taspase 1	TASP1	-0.702	0.000143	Bipolar
ENSRNOG00000004494	leukotriene A4 hydrolase	LTA4H	-0.307	0.00158
ENSRNOG00000004496	Rho associated coiled-coil containing protein kinase 2	ROCK2	-0.094	0.252	Muller
ENSRNOG00000004499	G protein-coupled receptor 135	GPR135	0.011	0.981	Muller
ENSRNOG00000004500	MYC proto-oncogene, bHLH transcription factor	MYC	0.687	0.121	Microglia
ENSRNOG00000004503	trans-L-3-hydroxyproline dehydratase	L3HYPDH	-0.578	0.00886	Horizontal
ENSRNOG00000004505	nuclear factor I C	NFIC	0.164	0.129
ENSRNOG00000004509	E2F associated phosphoprotein	EAPP	-0.253	0.0381	Muller
ENSRNOG00000004510	solute carrier family 35 member B1	SLC35B1	-0.26	0.00308
ENSRNOG00000004512	apolipoprotein O like	APOOL	-0.463	0.00571	Bipolar
ENSRNOG00000004515	pescadillo ribosomal biogenesis factor 1	PES1	-0.3	0.000225	Muller
ENSRNOG00000004516	integrin subunit beta like 1	ITGBL1	0.619	0.0656
ENSRNOG00000004517	insulin like growth factor 1	IGF1	-0.033	0.884	Bipolar
ENSRNOG00000004518	calcium voltage-gated channel auxiliary subunit beta 1	Cacnb1	0.304	0.00482
ENSRNOG00000004519	autophagy related 2B	Atg2b	0.04	0.629
ENSRNOG00000004520	dynein 2 intermediate chain 1	DYNC2I1	-0.925	2.07e-33
[truncated: 14,174 more rows]

## Sheet: iRCS Pathway Enrichment
Â© 2000-2024 QIAGEN. All rights reserved.
Ingenuity Canonical Pathways	-log(p-value)	Ratio	z-score
Visual phototransduction	20	0.483	-4.642
Phagosome Formation	16.9	0.142	6.533
TREM1 Signaling	16.4	0.377	3.78
Neuroinflammation Signaling Pathway	13.7	0.177	5.774
Phototransduction Pathway	13.4	0.407	NaN
G-Protein Coupled Receptor Signaling	12.6	0.128	4.638
Leukocyte Extravasation Signaling	12.2	0.207	2.694
Interferon gamma signaling	11.2	0.277	3.922
Pathogen Induced Cytokine Storm Signaling Pathway	10.3	0.148	5.528
Neutrophil degranulation	9.59	0.132	6.425
Toll-like Receptor Cascades	9.49	0.452	3.742
IL-27 Signaling Pathway	9.33	0.219	2.268
IL-10 Signaling	9.3	0.201	-1.976
CREB Signaling in Neurons	9.09	0.12	4.52
Macrophage Classical Activation Signaling Pathway	8.78	0.18	4.116
BBSome Signaling Pathway	8.29	0.125	2.433
Macrophage Alternative Activation Signaling Pathway	8.14	0.174	2.611
Interferon alpha/beta signaling	8.07	0.268	3.441
Role of Pattern Recognition Receptors in Recognition of Bacteria and Viruses	7.92	0.186	4.123
Signaling by Rho Family GTPases	7.8	0.15	2.711
ISGylation Signaling Pathway	7.55	0.213	4.379
Th1 and Th2 Activation Pathway	7.51	0.174	NaN
G alpha (i) signalling events	7.25	0.147	1.298
RAR Activation	7.15	0.124	-0.962
RHOGDI Signaling	7.07	0.155	-1.698
Production of Nitric Oxide and Reactive Oxygen Species in Macrophages	6.99	0.162	3.922
Antigen Presentation Pathway	6.95	0.333	NaN
Th2 Pathway	6.76	0.182	1.706
IL-12 Signaling and Production in Macrophages	6.37	0.145	0
Acute Phase Response Signaling	6.26	0.157	2.982
Crosstalk between Dendritic Cells and Natural Killer Cells	6.21	0.209	3.873
MSP-RON Signaling in Macrophages Pathway	6.13	0.185	0.218
RHO GTPase cycle	6.12	0.116	2.774
Toll-like Receptor Signaling	5.9	0.218	2.53
Regulation of Actin-based Motility by Rho	5.79	0.183	1.508
GPVI-mediated activation cascade	5.68	0.314	3.317
Regulation of Cellular Mechanics by Calpain Protease	5.64	0.2	-1.89
IL-8 Signaling	5.58	0.143	3.674
Interleukin-4 and Interleukin-13 signaling	5.51	0.182	3.578
Actin Nucleation by ARP-WASP Complex	5.42	0.194	0.378
Complement System	5.42	0.297	1.134
Integrin cell surface interactions	5.36	0.2	2.183
Pyroptosis Signaling Pathway	5.35	0.191	4.243
HGF Signaling	5.35	0.167	2.111
Agranulocyte Adhesion and Diapedesis	5.12	0.138	NaN
NOD1/2 Signaling Pathway	5.09	0.143	4.426
Myelination Signaling Pathway	5.07	0.119	3.363
Class A/1 (Rhodopsin-like receptors)	5.01	0.12	3.893
Semaphorin Neuronal Repulsive Signaling Pathway	4.94	0.153	0.229
Activin Inhibin Signaling Pathway	4.81	0.133	2.785
Th1 Pathway	4.81	0.164	4.025
Natural Killer Cell Signaling	4.72	0.136	3.53
Surfactant metabolism	4.64	0.348	2.121
Granulocyte Adhesion and Diapedesis	4.63	0.138	NaN
IL-17A Signaling in Fibroblasts	4.6	0.184	2.5
cAMP-mediated signaling	4.57	0.127	1.512
RAC Signaling	4.56	0.153	1.897
Ephrin Receptor Signaling	4.56	0.134	0.471
Interleukin-10 signaling	4.52	0.244	3.317
Trafficking and processing of endosomal TLR	4.41	0.462	2.449
TNFR2 Signaling	4.32	0.281	1.134
Actin Cytoskeleton Signaling	4.29	0.123	1.147
Integrin Signaling	4.19	0.127	2.6
Caveolar-mediated Endocytosis Signaling	4.17	0.187	NaN
FcÎ³ Receptor-mediated Phagocytosis in Macrophages and Monocytes	4.17	0.17	4
CD40 Signaling	4.1	0.194	2.714
Neutrophil Extracellular Trap Signaling Pathway	4.09	0.105	3.703
Death Receptor Signaling	4.06	0.167	1.807
fMLP Signaling in Neutrophils	3.86	0.145	2.138
Phagosome Maturation	3.85	0.134	NaN
Erythropoietin Signaling Pathway	3.83	0.131	-0.655
Relaxin Signaling	3.77	0.135	0.632
ILK Signaling	3.76	0.124	2.558
LXR/RXR Activation	3.74	0.146	-2
Axonal Guidance Signaling	3.7	0.0961	NaN
Regulation of the Epithelial Mesenchymal Transition by Growth Factors Pathway	3.67	0.125	3.273
Transport of inorganic cations/anions and amino acids/oligopeptides	3.64	0.154	-0.5
Signaling by CSF1 (M-CSF) in myeloid cells	3.61	0.258	2.828
Formation of Fibrin Clot (Clotting Cascade)	3.59	0.231	1.667
Interleukin-6 family signaling	3.58	0.292	1.89
Sertoli Cell-Sertoli Cell Junction Signaling	3.57	0.115	3.024
Trehalose Degradation II (Trehalase)	3.51	0.571	NaN
G-protein beta:gamma signalling	3.51	0.25	0.707
G alpha (q) signalling events	3.48	0.126	1.706
GÎ±i Signaling	3.48	0.136	1.291
IL-6 Signaling	3.47	0.14	3.5
Sertoli Cell-Germ Cell Junction Signaling Pathway (Enhanced)	3.41	0.114	2.117
Sphingosine-1-phosphate Signaling	3.39	0.142	1.291
Role of JAK family kinases in IL-6-type Cytokine Signaling	3.35	0.165	3.051
DAP12 interactions	3.34	0.214	3
Tight Junction Signaling	3.28	0.122	NaN
Ceramide Signaling	3.26	0.154	1.387
STAT3 Pathway	3.23	0.133	2.496
Circadian Rhythm Signaling	3.22	0.108	NaN
Inflammasome pathway	3.21	0.3	2.449
Role of PKR in Interferon Induction and Antiviral Response	3.19	0.132	2.673
Oxytocin Signaling Pathway	3.19	0.106	1.095
Sperm Motility	3.18	0.109	0
Interferon Signaling	3.14	0.222	1.89
Regulation of TLR by endogenous ligand	3.08	0.286	2.449
Cell surface interactions at the vascular wall	3.07	0.114	3.266
NAD Signaling Pathway	3.06	0.126	1.147
PAK Signaling	3.06	0.137	1.134
FXR/RXR Activation	3.05	0.118	-2.558
TWEAK Signaling	3.05	0.216	-0.378
Paxillin Signaling	3.01	0.14	0.378
Platelet Adhesion to exposed collagen	2.98	0.333	0.447
Wound Healing Signaling Pathway	2.98	0.107	3.657
RHO GTPases Activate NADPH Oxidases	2.97	0.273	2.449
HMGB1 Signaling	2.92	0.12	2.887
Opioid Signaling Pathway	2.92	0.104	2.353
Serotonin Receptor Signaling	2.91	0.0917	2.592
Cilium Assembly	2.91	0.113	-3.545
CXCR4 Signaling	2.89	0.119	1.069
MSP-RON Signaling Pathway	2.86	0.172	NaN
Signal regulatory protein family interactions	2.84	0.312	2.236
CLEAR Signaling Pathway	2.8	0.102	-3.157
Prostanoid Biosynthesis	2.8	0.4	NaN
G alpha (12/13) signalling events	2.77	0.15	1.155
Apelin Adipocyte Signaling Pathway	2.76	0.143	-0.632
GÎ±s Signaling	2.71	0.127	2.111
Pulmonary Healing Signaling Pathway	2.7	0.111	2.985
TNFR1 Signaling	2.7	0.176	1.134
Signal amplification	2.68	0.212	0.378
Apoptosis Signaling	2.68	0.135	-0.277
GP6 Signaling Pathway	2.68	0.126	2.138
GDP-glucose Biosynthesis	2.62	0.364	NaN
Eicosanoid Signaling	2.62	0.1	2.117
Signaling by SCF-KIT	2.61	0.186	2.828
Transcriptional regulation by RUNX3	2.55	0.135	1.387
MIF Regulation of Innate Immunity	2.54	0.182	2.646
Coagulation System	2.53	0.2	-0.378
IL-9 Signaling	2.53	0.2	1.633
Signaling by VEGF	2.53	0.13	3.742
PPARÎ±/RXRÎ± Activation	2.5	0.108	-2.138
G alpha (s) signalling events	2.47	0.117	0.728
BMAL1:CLOCK,NPAS2 activates circadian gene expression	2.47	0.222	0.816
Syndecan interactions	2.47	0.222	0.816
Interleukin-3, Interleukin-5 and GM-CSF signaling	2.47	0.164	3
Sensory processing of sound by outer hair cells of the cochlea	2.47	0.164	1
Macropinocytosis Signaling	2.46	0.145	1.89
Glucose and Glucose-1-phosphate Degradation	2.46	0.333	NaN
MIF-mediated Glucocorticoid Regulation	2.45	0.194	2.449
IL-15 Production	2.41	0.122	3.207
POU5F1 (OCT4), SOX2, NANOG activate genes related to proliferation	2.32	0.308	2
UDP-N-acetyl-D-galactosamine Biosynthesis II	2.32	0.308	NaN
Human Embryonic Stem Cell Pluripotency	2.32	0.104	3.273
White Adipose Tissue Browning Pathway	2.31	0.116	1.291
MHC class II antigen presentation	2.31	0.119	1.807
Apelin Muscle Signaling Pathway	2.3	0.167	NaN
Glycosaminoglycan metabolism	2.29	0.138	-0.905
Sumoylation Pathway	2.28	0.126	-0.333
Transcriptional Regulatory Network in Embryonic Stem Cells	2.28	0.11	3.3
Endocannabinoid Developing Neuron Pathway	2.28	0.118	1.604
Glucocorticoid Receptor Signaling	2.26	0.0825	NaN
CGAS-STING Signaling Pathway	2.25	0.114	3
Gap Junction Signaling	2.25	0.0923	0.557
Chemokine Signaling	2.25	0.136	0.905
IL-13 Signaling Pathway	2.24	0.121	2.673
Type II Diabetes Mellitus Signaling	2.24	0.111	2.333
Activation of kainate receptors upon glutamate binding	2.23	0.2	0
Protein Kinase A Signaling	2.22	0.0876	0.392
JAK/STAT Signaling	2.21	0.134	1.897
Extracellular matrix organization	2.18	0.123	1.387
Kinesins	2.16	0.148	-1.667
Insulin Secretion Signaling Pathway	2.15	0.0945	2.985
Response to elevated platelet cytosolic Ca2+	2.12	0.114	3.357
Germ Cell-Sertoli Cell Junction Signaling	2.12	0.106	NaN
GÎ±q Signaling	2.12	0.106	2.309
Role of JAK2 in Hormone-like Cytokine Signaling	2.12	0.145	1.667
GÎ±12/13 Signaling	2.09	0.113	2.496
Inositol Pyrophosphates Biosynthesis	2.09	0.375	NaN
MyD88:MAL(TIRAP) cascade initiated on plasma membrane	2.07	0.167	2.646
Oxytocin in Brain Signaling Pathway	2.05	0.101	-0.894
Lactose synthesis	2.04	0.667	NaN
GPCR-Mediated Integration of Enteroendocrine Signaling Exemplified by an L Cell	2.04	0.133	0
B Cell Activating Factor Signaling	2.02	0.163	2
O-linked glycosylation	2.01	0.117	-0.832
The Visual Cycle	2.01	0.208	-2.236
Senescence Pathway	1.96	0.0903	1.877
4-1BB Signaling in T Lymphocytes	1.96	0.176	2
Antiproliferative Role of Somatostatin Receptor 2	1.96	0.13	1.633
Degradation of the extracellular matrix	1.94	0.136	1
TCR signaling	1.94	0.111	3.207
Interleukin-1 processing	1.94	0.333	NaN
Signaling by Erythropoietin	1.93	0.2	2.236
Costimulation by the CD28 family	1.92	0.128	3.162
NF-ÎºB Activation by Viruses	1.92	0.128	2.828
Beta-catenin independent WNT signaling	1.91	0.118	-0.577
Immunogenic Cell Death Signaling Pathway	1.91	0.122	2.714
IL-17A Signaling in Airway Cells	1.9	0.134	1.89
Class I MHC mediated antigen processing and presentation	1.88	0.0853	3.182
TR/RXR Activation	1.88	0.109	0.535
Role of JAK1, JAK2 and TYK2 in Interferon Signaling	1.86	0.192	NaN
Cytosolic sensors of pathogen-associated DNA	1.86	0.152	1.134
Interleukin-2 family signaling	1.86	0.152	2.646
Role of OCT4 in Mammalian Embryonic Stem Cell Pluripotency	1.86	0.152	NaN
Necroptosis Signaling Pathway	1.85	0.103	2.5
Regulation of the Epithelial-Mesenchymal Transition Pathway	1.84	0.0974	NaN
Sensory processing of sound by inner hair cells of the cochlea	1.82	0.13	0.333
Sensory perception of taste	1.81	0.149	0.378
iNOS Signaling	1.81	0.149	2.449
Virus Entry via Endocytic Pathways	1.81	0.11	NaN
Apelin Liver Signaling Pathway	1.79	0.185	-0.447
Detoxification of Reactive Oxygen Species	1.78	0.162	2.449
GM-CSF Signaling	1.78	0.129	2.828
Neurotransmitter uptake and metabolism In glial cells	1.75	0.5	NaN
p38 MAPK Signaling	1.75	0.108	2.496
Growth Hormone Signaling	1.75	0.127	1
Adrenergic Receptor Signaling Pathway (Enhanced)	1.74	0.095	-1.606
CDP-diacylglycerol Biosynthesis I	1.73	0.179	-2
AMPK Signaling	1.73	0.0909	0
GADD45 Signaling	1.73	0.133	-0.707
Ephrin B Signaling	1.71	0.125	0
NFE2L2 regulating anti-oxidant/detoxification enzymes	1.71	0.211	1
Gustation Pathway	1.7	0.0941	1.147
NGF-stimulated transcription	1.68	0.154	1.633
LPS-stimulated MAPK Signaling	1.68	0.118	2.828
Endocannabinoid Neuronal Synapse Pathway	1.67	0.101	0.535
TNFs bind their physiological receptors	1.66	0.172	2.236
UVA-Induced MAPK Signaling	1.66	0.112	1.633
Neurovascular Coupling Signaling Pathway	1.65	0.0905	0.218
FGF Signaling	1.64	0.116	1.897
GNRH Signaling	1.64	0.0942	1.387
Transcriptional regulation of granulopoiesis	1.63	0.137	1.633
Glycerophospholipid biosynthesis	1.63	0.111	-0.302
Signaling by CSF3 (G-CSF)	1.61	0.167	2.236
Phosphatidylglycerol Biosynthesis II (Non-plastidic)	1.61	0.167	-2
Estrogen Receptor Signaling	1.6	0.0807	2.646
Transport of vitamins, nucleosides, and related molecules	1.58	0.146	0
GP1b-IX-V activation signalling	1.57	0.25	NaN
MyD88 dependent cascade initiated on endosome	1.55	0.161	2.236
Signaling by MST1	1.55	0.4	NaN
Lysine Degradation V	1.55	0.4	NaN
Signaling by TGF-beta Receptor Complex	1.55	0.132	1.134
April Mediated Signaling	1.53	0.143	1.342
Integration of energy metabolism	1.52	0.107	0.378
Glutamate Receptor Signaling	1.5	0.121	NaN
Thrombin signalling through proteinase activated receptors (PARs)	1.5	0.156	-0.447
Neuregulin Signaling	1.49	0.103	NaN
Vasopressin regulates renal water homeostasis via Aquaporins	1.49	0.14	0
Retinoate Biosynthesis I	1.49	0.14	-1
Platelet Aggregation (Plug Formation)	1.48	0.231	NaN
Passive transport by Aquaporins	1.48	0.231	NaN
Fc Epsilon RI Signaling	1.47	0.102	2.887
Elastic fibre formation	1.45	0.136	0
Signaling by Retinoic Acid	1.45	0.136	0
NLR signaling pathways	1.43	0.125	1.89
Triacylglycerol Biosynthesis	1.43	0.125	-1.633
Autophagy	1.42	0.0876	-0.229
Post-translational protein phosphorylation	1.41	0.103	0.905
PPAR Signaling	1.41	0.103	-3.162
Arachidonic acid metabolism	1.4	0.133	0.816
GPER1 signaling	1.4	0.133	-0.816
Role of JAK1 and JAK3 in Î³c Cytokine Signaling	1.4	0.116	NaN
Synthesis of Lipoxins (LX)	1.39	0.333	NaN
Chondroitin and Dermatan Biosynthesis	1.39	0.333	NaN
tRNA Splicing	1.36	0.13	-0.447
Apelin Pancreas Signaling Pathway	1.36	0.13	0
Other interleukin signaling	1.36	0.167	1
Growth hormone receptor signaling	1.36	0.167	2
Transport of bile salts and organic acids, metal ions and amine compounds	1.36	0.108	1
Class B/2 (Secretin family receptors)	1.36	0.104	0
IL-1 Signaling	1.36	0.104	NaN
Docosahexaenoic Acid (DHA) Signaling	1.35	0.084	-0.655
Glutaminergic Receptor Signaling Pathway (Enhanced)	1.33	0.08	0
RHOA Signaling	1.33	0.0968	1.265
Heme signaling	1.33	0.128	2.449
Acetylcholine Receptor Signaling Pathway	1.32	0.0876	0.243
Iron homeostasis signaling pathway	1.32	0.0942	NaN
Corticotropin Releasing Hormone Signaling	1.32	0.0921	0
Sleep REM Signaling Pathway	1.31	0.0991	-1.508
YAP1- and WWTR1 (TAZ)-stimulated gene expression	1.31	0.2	NaN
Synthesis of Prostaglandins (PG) and Thromboxanes (TX)	1.31	0.2	NaN
Protein folding	1.31	0.102	0
Striated Muscle Contraction	1.3	0.139	-0.447
Adipogenesis pathway	1.3	0.0935	0.832
G alpha (z) signalling events	1.29	0.125	-0.816
Extra-nuclear estrogen signaling	1.28	0.11	0.707
ROBO SLIT Signaling Pathway	1.26	0.0945	-2.309
Semaphorin Signaling in Neurons	1.26	0.115	NaN
MyD88-independent TLR4 cascade	1.26	0.135	2.236
TEC Kinase Signaling	1.25	0.0727	3.53
IL-17A Signaling in Gastric Cells	1.25	0.154	NaN
PDGF Signaling	1.25	0.103	3
L-cysteine Degradation II	1.25	1	NaN
Regulation of eIF4 and p70S6K Signaling	1.25	0.087	0.816
LPS/IL-1 Mediated Inhibition of RXR Function	1.25	0.0817	2.828
Antioxidant Action of Vitamin C	1.25	0.0965	-1
Caspase activation via Death Receptors in the presence of ligand	1.24	0.188	NaN
Glutaryl-CoA Degradation	1.24	0.188	NaN
Bile Acid Biosynthesis, Neutral Pathway	1.24	0.188	NaN
IL-33 Signaling Pathway	1.23	0.0865	2
IL-2 Signaling	1.23	0.113	1.89
Ribonucleotide Reductase Signaling Pathway	1.22	0.0877	2.84
G Beta Gamma Signaling	1.22	0.093	0.905
IL-17 Signaling	1.2	0.0856	4
Immunoregulatory interactions between a Lymphoid and a non-Lymphoid cell	1.19	0.0842	3.638
Potassium Channels	1.19	0.0971	-1.265
Ferroptosis Signaling Pathway	1.18	0.0916	1.732
Pancreatic Secretion Signaling Pathway	1.18	0.081	2.683
Opioid Signalling	1.18	0.1	0.333
Transcriptional regulation of pluripotent stem cells	1.17	0.176	NaN
FOXO-mediated transcription of cell cycle genes	1.17	0.176	NaN
Germ layer formation at gastrulation	1.17	0.176	NaN
1D-myo-inositol Hexakisphosphate Biosynthesis II (Mammalian)	1.17	0.176	NaN
D-myo-inositol (1,3,4)-trisphosphate Biosynthesis	1.17	0.176	NaN
ESR-mediated signaling	1.16	0.0932	1.265
GPCR-Mediated Nutrient Sensing in Enteroendocrine Cells	1.16	0.0932	0.302
Signaling by ALK	1.15	0.143	1
Interleukin-17 signaling	1.15	0.25	NaN
Neurotrophin/TRK Signaling	1.14	0.103	1.414
Transcriptional Regulation by VENTX	1.14	0.125	0.447
Cell junction organization	1.13	0.0978	0.333
NGF Signaling	1.12	0.0917	2.333
DDX58/IFIH1-mediated induction of interferon-alpha/beta	1.12	0.101	1.414
IL-3 Signaling	1.12	0.101	1.414
Nicotinate metabolism	1.11	0.167	NaN
Formation of definitive endoderm	1.11	0.167	NaN
EGR2 and SOX10-mediated initiation of Schwann cell myelination	1.11	0.138	1
Orexin Signaling Pathway	1.09	0.0798	-0.229
Acetone Degradation I (to Methylglyoxal)	1.07	0.119	NaN
FOXO-mediated transcription of oxidative stress, metabolic and neuronal genes	1.07	0.133	-1
DHCR24 Signaling Pathway	1.07	0.0876	1.155
Prolactin Signaling	1.06	0.0947	1.89
TNFR2 non-canonical NF-kB pathway	1.06	0.103	2.646
OAS antiviral response	1.06	0.222	NaN
Interleukin-9 signaling	1.06	0.222	NaN
Leucine Degradation I	1.06	0.222	NaN
Mitochondrial L-carnitine Shuttle Pathway	1.05	0.158	NaN
Regulation of Insulin-like Growth Factor (IGF) transport and uptake by IGFBPs	1.04	0.0887	0.905
Role of NANOG in Mammalian Embryonic Stem Cell Pluripotency	1.04	0.0887	2.646
Oncostatin M Signaling	1.03	0.116	2.236
Synaptic Long Term Depression	1.03	0.0808	-0.258
Salvage Pathways of Pyrimidine Ribonucleotides	1.02	0.0928	-1.414
PIP3 activates AKT signaling	1.01	0.0857	2.887
TAK1-dependent IKK and NF-kappa-B activation	1	0.114	1.342
Regulation of mRNA stability by proteins that bind AU-rich elements	1	0.114	2.236
TBC/RABGAPs	1	0.114	-0.447
TNF signaling	0.998	0.105	0
CD27 Signaling in Lymphocytes	0.998	0.105	2
PEDF Signaling	0.998	0.0952	1.633
Melanocyte Development and Pigmentation Signaling	0.996	0.0918	1.414
14-3-3-mediated Signaling	0.986	0.0866	2.333
Toll Like Receptor 3 (TLR3) Cascade	0.985	0.125	2
RIPK1-mediated regulated necrosis	0.985	0.125	1
Ketone body metabolism	0.976	0.2	NaN
Embryonic Stem Cell Differentiation into Cardiac Lineages	0.976	0.2	NaN
Ketolysis	0.976	0.2	NaN
VEGF Signaling	0.975	0.0909	1.667
Choline Degradation I	0.96	0.5	NaN
Cysteine Biosynthesis/Homocysteine Degradation	0.96	0.5	NaN
Netrin Signaling	0.955	0.0809	1.069
Platelet homeostasis	0.954	0.093	0.707
Interleukin-7 signaling	0.952	0.143	NaN
MAPK targets/ Nuclear events mediated by MAP kinases	0.948	0.121	0
Role of RIG1-like Receptors in Antiviral Innate Immunity	0.938	0.109	NaN
IL-23 Signaling Pathway	0.938	0.109	2
Amyloid fiber formation	0.934	0.0959	2.646
Calcium Signaling	0.932	0.0773	-0.905
Superpathway of Inositol Phosphate Compounds	0.924	0.0763	1.5
Phase I - Functionalization of compounds	0.916	0.0882	1.667
NRF2-mediated Oxidative Stress Response	0.911	0.0759	1
Superpathway of D-myo-inositol (1,4,5)-trisphosphate Metabolism	0.906	0.136	NaN
Neurotransmitter receptors and postsynaptic signal transmission	0.905	0.182	NaN
Ketogenesis	0.905	0.182	NaN
GABA Receptor Signaling	0.901	0.0833	NaN
Meiotic recombination	0.88	0.104	-2.236
Mouse Embryonic Stem Cell Pluripotency	0.879	0.0865	2.333
Transcriptional Regulation by NPAS4	0.878	0.114	0
Cholecystokinin/Gastrin-mediated Signaling	0.872	0.084	1.414
WNT/SHH Axonal Guidance Signaling Pathway	0.867	0.0805	2.309
GDNF Family Ligand-Receptor Interactions	0.867	0.0921	1.89
Tryptophan Degradation III (Eukaryotic)	0.863	0.13	NaN
IGF-1 Signaling	0.861	0.0857	1.633
Factors involved in megakaryocyte development and platelet production	0.852	0.0879	0.707
RHO GTPases Activate WASPs and WAVEs	0.846	0.111	2
Thrombopoietin Signaling	0.844	0.0952	2.449
WNK Renal Signaling Pathway	0.843	0.0849	0.816
Reversible hydration of carbon dioxide	0.841	0.167	NaN
IL-7 Signaling Pathway	0.825	0.0897	1.633
Regulation of RUNX1 Expression and Activity	0.823	0.125	NaN
Tumoricidal Function of Hepatic Natural Killer Cells	0.823	0.125	NaN
Mitochondrial biogenesis	0.821	0.0938	-1.633
Semaphorin interactions	0.821	0.0938	0.816
Gene and protein expression by JAK-STAT signaling after IL-12 stimulation	0.814	0.108	0
Reelin Signaling in Neurons	0.807	0.0797	2.714
Transcriptional regulation by RUNX2	0.8	0.098	0.447
Androgen Signaling	0.799	0.0769	-0.816
Activation of IRF by Cytosolic Pattern Recognition Receptors	0.799	0.0923	1.342
ERB2-ERBB3 Signaling	0.799	0.0923	2.449
MTF1 activates gene expression	0.797	0.333	NaN
Thyronamine and Iodothyronamine Metabolism	0.797	0.333	NaN
Thyroid Hormone Metabolism I (via Deiodination)	0.797	0.333	NaN
1D-myo-inositol Hexakisphosphate Biosynthesis V (from Ins(1,3,4)P3)	0.797	0.333	NaN
Î±-Adrenergic Signaling	0.792	0.0826	NaN
Bupropion Degradation	0.784	0.12	NaN
Azathioprine ADME	0.784	0.154	NaN
Apoptotic execution phase	0.775	0.0962	0.447
TGF-Î² Signaling	0.761	0.0833	1.414
Inhibition of Matrix Metalloproteases	0.756	0.103	0
Fcgamma receptor (FCGR) dependent phagocytosis	0.755	0.0764	3.464
Interleukin-20 family signaling	0.749	0.115	NaN
Estrogen-mediated S-phase Entry	0.749	0.115	NaN
D-myo-inositol (1,4,5)-Trisphosphate Biosynthesis	0.749	0.115	NaN
FLT3 Signaling in Hematopoietic Progenitor Cells	0.747	0.0854	1.134
BEX2 Signaling Pathway	0.747	0.0854	1.633
Acetylcholine binding and downstream events	0.733	0.143	NaN
LGI-ADAM interactions	0.733	0.143	NaN
Interleukin-15 signaling	0.733	0.143	NaN
Aspirin ADME	0.733	0.143	NaN
Urate Biosynthesis/Inosine 5'-phosphate Degradation	0.733	0.143	NaN
Aryl Hydrocarbon Receptor Signaling	0.729	0.0755	0.707
Neurotransmitter release cycle	0.729	0.1	-1
Interleukin-1 family signaling	0.717	0.0775	2.53
Phospholipases	0.716	0.087	0
Integrin signaling	0.715	0.111	NaN
Fatty acyl-CoA biosynthesis	0.715	0.111	NaN
Gluconeogenesis I	0.715	0.111	NaN
Transcriptional regulation of white adipocyte differentiation	0.711	0.0833	0.378
VEGF Family Ligand-Receptor Interactions	0.711	0.0833	2.646
Lymphotoxin Î² Receptor Signaling	0.706	0.0909	NaN
Gamma carboxylation, hypusine formation and arylsulfatase activation	0.702	0.0976	1
Signaling by Activin	0.687	0.133	NaN
Response of EIF2AK1 (HRI) to heme deficiency	0.687	0.133	NaN
Fatty Acid Activation	0.687	0.133	NaN
NR1D1 (REV-ERBA) represses gene expression	0.684	0.25	NaN
Taurine Biosynthesis	0.684	0.25	NaN
Glutathione Redox Reactions I	0.683	0.107	NaN
Inhibition of ARE-Mediated mRNA Degradation Pathway	0.679	0.0736	1.897
Stearate Biosynthesis I (Animals)	0.677	0.0845	0
Regulation of beta-cell development	0.677	0.0952	0
CNTF Signaling	0.663	0.0877	2.236
Regulation of the Epithelial Mesenchymal Transition in Development Pathway	0.66	0.0805	1.633
CCR3 Signaling in Eosinophils	0.65	0.0746	2
Iron uptake and transport	0.643	0.0862	0.447
Regulation of lipid metabolism by PPARalpha	0.641	0.0756	-3
Complement cascade	0.637	0.0741	3.162
Ion channel transport	0.632	0.071	0.277
TP53 Regulates Transcription of Cell Death Genes	0.63	0.0909	0
Retinoid metabolism and transport	0.63	0.0909	-1
ERK5 Signaling	0.624	0.0811	0.816
Circadian Clock	0.623	0.0847	-2.236
Unfolded protein response	0.613	0.0778	1.342
GABA receptor activation	0.604	0.0833	-0.447
Dopamine-DARPP32 Feedback in cAMP Signaling	0.6	0.0699	0.707
Signaling by the B Cell Receptor (BCR)	0.599	0.0706	3.464
FasL/ CD95L signaling	0.599	0.2	NaN
Intestinal absorption	0.599	0.2	NaN
Formation of lateral plate mesoderm	0.599	0.2	NaN
CMP-N-acetylneuraminate Biosynthesis I (Eukaryotes)	0.599	0.2	NaN
Lysine Degradation II	0.599	0.2	NaN
BMP signaling pathway	0.597	0.0769	-0.816
Bile acid and bile salt metabolism	0.597	0.0968	NaN
Methylglyoxal Degradation III	0.597	0.0968	NaN
GABAergic Receptor Signaling Pathway (Enhanced)	0.588	0.0719	-0.632
RORA activates gene expression	0.569	0.111	NaN
Metabolism of Angiotensinogen to Angiotensins	0.569	0.111	NaN
Fc epsilon receptor (FCERI) signaling	0.564	0.068	3.207
VDR/RXR Activation	0.559	0.0769	1
Transcriptional Regulation by MECP2	0.551	0.0794	NaN
Retinol Biosynthesis	0.545	0.0833	-2
Clathrin-mediated Endocytosis Signaling	0.545	0.0673	NaN
Signaling by MET	0.544	0.0759	0
Xenobiotic Metabolism General Signaling Pathway	0.542	0.0699	1.897
Î³-linolenate Biosynthesis II (Animals)	0.536	0.105	NaN
Purine Nucleotides Degradation II (Aerobic)	0.536	0.105	NaN
Fructose metabolism	0.532	0.167	NaN
Lipid particle organization	0.532	0.167	NaN
Pyruvate Fermentation to Lactate	0.532	0.167	NaN
Glycine Cleavage Complex	0.532	0.167	NaN
Transcriptional activity of SMAD2/SMAD3:SMAD4 heterotrimer	0.526	0.0816	NaN
Oncogene Induced Senescence	0.523	0.0882	NaN
Triglyceride metabolism	0.523	0.0882	NaN
Fatty Acid Î²-oxidation I	0.523	0.0882	NaN
C-type lectin receptors (CLRs)	0.521	0.069	3
Pyridoxal 5'-phosphate Salvage Pathway	0.518	0.0769	-1
Signaling by NTRK1 (TRKA)	0.515	0.0741	0.816
MYC Mediated Apoptosis Signaling	0.508	0.08	1
Cardiac conduction	0.507	0.0692	-0.378
Interleukin-12 family signaling	0.506	0.1	NaN
Deubiquitination	0.502	0.0646	1.213
Oxytocin in Spinal Neurons Signaling Pathway	0.501	0.0857	NaN
Sleep NREM Signaling Pathway	0.492	0.0696	-0.707
Synaptogenesis Signaling Pathway	0.49	0.0635	2.982
Signaling by NOTCH4	0.487	0.0723	0.816
Collagen biosynthesis and modifying enzymes	0.487	0.0746	-1.342
FLT3 Signaling	0.48	0.0833	NaN
Nucleotide salvage	0.477	0.0952	NaN
Endoplasmic Reticulum Stress Pathway	0.477	0.0952	NaN
Atorvastatin ADME	0.477	0.143	NaN
Epithelial-Mesenchymal Transition (EMT) during gastrulation	0.477	0.143	NaN
Aspartate Degradation II	0.477	0.143	NaN
Nicotine Degradation II	0.472	0.0735	2.236
Chondroitin Sulfate Biosynthesis (Late Stages)	0.456	0.0755	NaN
Interconversion of nucleotide di- and triphosphates	0.451	0.0909	NaN
Pregnenolone Biosynthesis	0.451	0.0909	NaN
Dendritic Cell Maturation	0.447	0.0604	4.564
Glutathione-mediated Detoxification	0.441	0.0789	NaN
HIPPO signaling	0.436	0.069	0
Miro GTPase Cycle	0.43	0.125	NaN
ISG15 antiviral mechanism	0.43	0.0704	1.342
RAF-independent MAPK1/3 activation	0.426	0.087	NaN
Signaling by NODAL	0.426	0.087	NaN
Pyrimidine Deoxyribonucleotides De Novo Biosynthesis I	0.426	0.087	NaN
Meiotic synapsis	0.425	0.0727	0
Signaling by PTK6	0.425	0.0727	2
Amino acids regulate mTORC1	0.425	0.0727	-1
Regulation of TP53 Expression and Degradation	0.422	0.0769	NaN
RHO GTPases Activate Formins	0.416	0.0647	-2.333
Folate Signaling Pathway	0.41	0.0714	1
EGF Signaling	0.41	0.0714	2
Xenobiotic Metabolism Signaling	0.406	0.0612	NaN
Signaling by FGFR2	0.404	0.0685	0.447
Sulfur amino acid metabolism	0.403	0.0833	NaN
RHO GTPases Activate Rhotekin and Rhophilins	0.391	0.111	NaN
Lysine catabolism	0.391	0.111	NaN
Lipophagy	0.391	0.111	NaN
Prednisone ADME	0.391	0.111	NaN
Sucrose Degradation V (Mammalian)	0.391	0.111	NaN
Phosphatidylethanolamine Biosynthesis II	0.391	0.111	NaN
Î±-tocopherol Degradation	0.391	0.111	NaN
Salvage Pathways of Pyrimidine Deoxyribonucleotides	0.391	0.111	NaN
RAF/MAP kinase cascade	0.39	0.0611	2
Signaling by FGFR4	0.388	0.0732	NaN
RET signaling	0.388	0.0732	NaN
RUNX1 regulates megakaryocyte differentiation and platelet function	0.383	0.069	0
Microautophagy Signaling Pathway	0.382	0.0625	1.633
Incretin synthesis, secretion, and inactivation	0.382	0.08	NaN
MAPK6/MAPK4 signaling	0.379	0.0652	1
Plasma lipoprotein assembly, remodeling, and clearance	0.369	0.0658	-0.447
Pre-NOTCH Expression and Processing	0.369	0.0658	NaN
mTOR Signaling	0.365	0.0607	1.89
Signaling by BMP	0.361	0.0769	NaN
WNT ligand biogenesis and trafficking	0.361	0.0769	NaN
Miscellaneous transport and binding events	0.361	0.0769	NaN
Signaling by Insulin receptor	0.357	0.0698	NaN
NIK-->noncanonical NF-kB signaling	0.356	0.0667	2
Retinoic acid Mediated Apoptosis Signaling	0.356	0.0667	2
POU5F1 (OCT4), SOX2, NANOG repress genes related to differentiation	0.356	0.1	NaN
ATF6 (ATF6-alpha) activates chaperone genes	0.356	0.1	NaN
D-myo-inositol-5-phosphate Metabolism	0.356	0.0606	1
Assembly of collagen fibrils and other multimeric structures	0.344	0.0656	0
Chondroitin Sulfate Biosynthesis	0.344	0.0656	NaN
Hedgehog 'off' state	0.343	0.0619	0.378
ATF4 activates genes in response to endoplasmic reticulum stress	0.342	0.0741	NaN
Pyroptosis	0.342	0.0741	NaN
PI3K Cascade	0.342	0.0682	NaN
Collagen chain trimerization	0.342	0.0682	NaN
Cytoprotection by HMOX1	0.332	0.0645	1
Carboxyterminal post-translational modifications of tubulin	0.328	0.0667	NaN
Signaling by Leptin	0.326	0.0909	NaN
SUMOylation of immune response proteins	0.326	0.0909	NaN
Aspartate and asparagine metabolism	0.326	0.0909	NaN
Alpha-protein kinase 1 signaling pathway	0.326	0.0909	NaN
Purine Nucleotides De Novo Biosynthesis II	0.326	0.0909	NaN
Glycine Betaine Degradation	0.326	0.0909	NaN
Glucose metabolism	0.326	0.0625	-0.447
Protein Ubiquitination Pathway	0.325	0.0586	NaN
Intra-Golgi and retrograde Golgi-to-ER traffic	0.323	0.0591	-1.732
Mitotic Prometaphase	0.323	0.0591	-2.887
Dermatan Sulfate Biosynthesis	0.321	0.0635	NaN
Estrogen Biosynthesis	0.315	0.0652	NaN
DNA damage-induced 14-3-3Ïƒ Signaling	0.315	0.0652	NaN
Energy dependent regulation of mTOR by LKB1-AMPK	0.308	0.069	NaN
PI Metabolism	0.306	0.061	2.236
p75 NTR receptor-mediated signalling	0.303	0.06	1.633
Ephrin A Signaling	0.302	0.0638	NaN
Presynaptic depolarization and calcium channel opening	0.3	0.0833	NaN
Tryptophan catabolism	0.3	0.0833	NaN
Hematopoiesis from Multipotent Stem Cells	0.3	0.0833	NaN
Mineralocorticoid Biosynthesis	0.3	0.0833	NaN
SNARE Signaling Pathway	0.299	0.0588	-0.707
3-phosphoinositide Biosynthesis	0.293	0.0577	1.414
DNA Damage Bypass	0.29	0.0625	NaN
Activation of NMDA receptors and postsynaptic events	0.288	0.0595	0
Mitotic Roles of Polo-Like Kinase	0.279	0.0597	NaN
Dissolution of Fibrin Clot	0.276	0.0769	NaN
Advanced glycosylation endproduct receptor signaling	0.276	0.0769	NaN
Mitochondrial calcium ion transport	0.276	0.0769	NaN
Guanosine Nucleotides Degradation III	0.276	0.0769	NaN
Glucocorticoid Biosynthesis	0.276	0.0769	NaN
Epithelial Adherens Junction Signaling	0.271	0.057	0.707
Oxidative Stress Induced Senescence	0.27	0.0581	NaN
Hedgehog 'on' state	0.27	0.0581	0.447
Cyclins and Cell Cycle Regulation	0.27	0.0581	0.447
ERBB4 Signaling	0.269	0.0588	2
Remodeling of Epithelial Adherens Junctions	0.269	0.0588	NaN
Signaling by EGFR	0.267	0.06	NaN
Signaling by FGFR1	0.267	0.06	NaN
Signaling by NOTCH3	0.267	0.06	NaN
NR1H2 and NR1H3-mediated signaling	0.267	0.06	NaN
Sphingolipid metabolism	0.262	0.0575	0.447
Agrin Interactions at Neuromuscular Junction	0.26	0.058	1
Cell Cycle: G1/S Checkpoint Regulation	0.26	0.058	NaN
Cell Cycle: G2/M DNA Damage Checkpoint Regulation	0.256	0.0588	NaN
Carnitine metabolism	0.255	0.0714	NaN
Regulation of TP53 Activity through Association with Co-factors	0.255	0.0714	NaN
Formation of axial mesoderm	0.255	0.0714	NaN
DNA Double-Strand Break Repair by Homologous Recombination	0.255	0.0714	NaN
Leukotriene Biosynthesis	0.255	0.0714	NaN
Mevalonate Pathway I	0.255	0.0714	NaN
TP53 Regulates Metabolic Genes	0.254	0.0568	0.447
UVB-Induced MAPK Signaling	0.246	0.0577	NaN
Signaling by NOTCH2	0.238	0.0588	NaN
Cargo concentration in the ER	0.238	0.0588	NaN
Regulation of Apoptosis	0.236	0.0566	NaN
Mitotic Telophase/Cytokinesis	0.236	0.0667	NaN
Choline Biosynthesis III	0.236	0.0667	NaN
Metabolism of steroid hormones	0.226	0.0571	NaN
Granzyme B Signaling	0.218	0.0625	NaN
D-myo-inositol (1,4,5)-trisphosphate Degradation	0.218	0.0625	NaN
Adenosine Nucleotides Degradation II	0.218	0.0625	NaN
RAN Signaling	0.203	0.0588	NaN
Isoleucine Degradation I	0.203	0.0588	NaN
Dermatan Sulfate Degradation (Metazoa)	0.203	0.0588	NaN
MicroRNA Biogenesis Signaling Pathway	0	0.0535	0.632
Synaptic Long Term Potentiation	0	0.053	1.134
Chaperone Mediated Autophagy Signaling Pathway	0	0.0394	-1
NFKBIE Signaling Pathway	0	0.0245	2.714
Intrinsic Pathway for Apoptosis	0	0.0545	NaN
Effects of PIP2 hydrolysis	0	0.037	NaN
Fertilization	0	0.0385	NaN
Cellular response to hypoxia	0	0.0267	NaN
Signaling by ERBB4	0	0.0339	NaN
The citric acid (TCA) cycle and respiratory electron transport	0	0.0545	NaN
Collagen degradation	0	0.0328	NaN
Translocation of SLC2A4 (GLUT4) to the plasma membrane	0	0.0423	NaN
Defensins	0	0.0233	NaN
DAG and IP3 signaling	0	0.0488	NaN
Phase II - Conjugation of compounds	0	0.0149	NaN
Eukaryotic Translation Elongation	0	0.0105	NaN
Telomere Maintenance	0	0.0274	NaN
Gap junction trafficking and regulation	0	0.0294	NaN
Macroautophagy	0	0.0462	NaN
MTOR signalling	0	0.0357	NaN
SRP-dependent cotranslational protein targeting to membrane	0	0.0087	NaN
Signaling by PDGF	0	0.0517	NaN
Cellular hexose transport	0	0.0455	NaN
Metabolism of porphyrins	0	0.0435	NaN
Cholesterol biosynthesis	0	0.04	NaN
Degradation of beta-catenin by the destruction complex	0	0.0326	NaN
Metabolism of water-soluble vitamins and cofactors	0	0.0169	NaN
Signaling by NOTCH1	0	0.0385	NaN
trans-Golgi Network Vesicle Budding	0	0.0541	2
TCF dependent signaling in response to WNT	0	0.0503	0.632
Signaling by Hippo	0	0.05	NaN
Generic Transcription Pathway	0	0.021	-0.333
RNA Polymerase II Transcription	0	0.0134	NaN
COPII-mediated vesicle transport	0	0.0556	1
Metabolism of amine-derived hormones	0	0.0556	NaN
Gene Silencing by RNA	0	0.0211	NaN
Binding and Uptake of Ligands by Scavenger Receptors	0	0.0179	NaN
Selenoamino acid metabolism	0	0.0187	NaN
Activation of gene expression by SREBF (SREBP)	0	0.0244	NaN
Mitotic Metaphase and Anaphase	0	0.0468	-1.508
Senescence-Associated Secretory Phenotype (SASP)	0	0.0548	2
DNA Damage/Telomere Stress Induced Senescence	0	0.0357	NaN
EPH-Ephrin signaling	0	0.0213	NaN
SUMOylation of DNA damage response and repair proteins	0	0.0263	NaN
HSP90 chaperone cycle for steroid hormone receptors in the presence of ligand	0	0.0364	NaN
Cellular response to heat stress	0	0.0309	NaN
Metabolism of polyamines	0	0.0339	NaN
Nephrin family interactions	0	0.0435	NaN
L1CAM interactions	0	0.048	0.816
NCAM signaling for neurite out-growth	0	0.0492	NaN
Signaling by ROBO receptors	0	0.0345	0
Unfolded Protein Response (UPR)	0	0.0556	NaN
XBP1(S) activates chaperone genes	0	0.0208	NaN
Olfactory Signaling Pathway	0	0.0405	NaN
ABC-family proteins mediated transport	0	0.0297	NaN
Glyoxylate metabolism and glycine degradation	0	0.0357	NaN
SUMOylation of transcription cofactors	0	0.0227	NaN
Glutamate binding, activation of AMPA receptors and synaptic plasticity	0	0.0312	NaN
SUMOylation of intracellular receptors	0	0.0357	NaN
Class C/3 (Metabotropic glutamate/pheromone receptors)	0	0.025	NaN
ERCC6 (CSB) and EHMT2 (G9a) positively regulate rRNA expression	0	0.027	NaN
Smooth Muscle Contraction	0	0.0465	NaN
MAP kinase activation	0	0.0256	NaN
Mitotic G2-G2/M phases	0	0.0553	-0.302
Regulation of mitotic cell cycle	0	0.0341	NaN
Mitotic G1 phase and G1/S transition	0	0.0458	2.449
Myogenesis	0	0.0345	NaN
Hedgehog ligand biogenesis	0	0.0308	NaN
Activation of anterior HOX genes in hindbrain during early embryogenesis	0	0.0123	NaN
Activated PKN1 stimulates transcription of AR regulated genes KLK2 and KLK3	0	0.0357	NaN
RHO GTPases activate CIT	0	0.0526	NaN
RHO GTPases activate IQGAPs	0	0.0323	NaN
Signaling by FGFR3	0	0.05	NaN
HDR through Homologous Recombination (HRR) or Single Strand Annealing (SSA)	0	0.0536	-1.633
Nonhomologous End-Joining (NHEJ)	0	0.0204	NaN
DNA Double Strand Break Response	0	0.0339	NaN
tRNA processing in the mitochondrion	0	0.0435	NaN
Major pathway of rRNA processing in the nucleolus and cytosol	0	0.0108	NaN
TP53 Regulates Transcription of Cell Cycle Genes	0	0.0204	NaN
Neurexins and neuroligins	0	0.0351	NaN
TP53 Regulates Transcription of DNA Repair Genes	0	0.0429	NaN
Regulation of TP53 Activity through Phosphorylation	0	0.0538	-0.447
Regulation of TP53 Activity through Acetylation	0	0.0333	NaN
Keratinization	0	0.028	1.633
PTEN Regulation	0	0.0467	0
RNA polymerase II transcribes snRNA genes	0	0.012	NaN
COPI-mediated anterograde transport	0	0.0098	NaN
Mitotic Prophase	0	0.0194	NaN
DNA Replication Pre-Initiation	0	0.0192	NaN
Synthesis of DNA	0	0.0336	1
S Phase	0	0.05	2.236
Cell Cycle Checkpoints	0	0.0515	-1.604
mRNA Capping	0	0.0345	NaN
Processing of Capped Intron-Containing Pre-mRNA	0	0.00697	NaN
Eukaryotic Translation Initiation	0	0.0164	NaN
Eukaryotic Translation Termination	0	0.0106	NaN
RNA Polymerase I Transcription	0	0.02	NaN
Processing of Capped Intronless Pre-mRNA	0	0.0345	NaN
Mitochondrial Fatty Acid Beta-Oxidation	0	0.0417	NaN
Nucleosome assembly	0	0.0408	NaN
Cargo recognition for clathrin-mediated endocytosis	0	0.0374	0
Clathrin-mediated endocytosis	0	0.0385	-0.447
Transcriptional regulation by the AP-2 (TFAP2) family of transcription factors	0	0.0278	NaN
E3 ubiquitin ligases ubiquitinate target proteins	0	0.0182	NaN
RAB geranylgeranylation	0	0.0308	NaN
RAB GEFs exchange GTP for GDP on RABs	0	0.0449	1
Transcriptional regulation by RUNX1	0	0.0395	0.816
Digestion	0	0.0476	NaN
Regulation of RUNX2 expression and activity	0	0.0411	NaN
Cristae formation	0	0.0323	NaN
Neddylation	0	0.0366	-1
Transcriptional Regulation by E2F6	0	0.0294	NaN
Nucleotide catabolism	0	0.0333	NaN
Peroxisomal protein import	0	0.0476	NaN
Nonsense-Mediated Decay (NMD)	0	0.00855	NaN
Assembly and cell surface presentation of NMDA receptors	0	0.0465	NaN
Chaperone Mediated Autophagy	0	0.0455	NaN
Response of EIF2AK4 (GCN2) to amino acid deficiency	0	0.0291	NaN
Aggrephagy	0	0.0233	NaN
RAS processing	0	0.0417	NaN
Expression and translocation of olfactory receptors	0	0.00251	NaN
KEAP1-NFE2L2 pathway	0	0.044	1
Mitochondrial Dysfunction	0	0.0494	-0.243
Protein Sorting Signaling Pathway	0	0.0562	1.897
UFMylation Signaling Pathway	0	0.0484	NaN
PXR/RXR Activation	0	0.0462	NaN
Role of NFAT in Regulation of the Immune Response	0	0.0338	4.271
FcÎ³RIIB Signaling in B Lymphocytes	0	0.0245	1.667
CCR5 Signaling in Macrophages	0	0.0301	1.342
IL-22 Signaling	0	0.0417	NaN
Calcium-induced T Lymphocyte Apoptosis	0	0.0174	2.646
Cytotoxic T Lymphocyte-mediated Apoptosis of Target Cells	0	0.0118	NaN
CTLA4 Signaling in Cytotoxic T Lymphocytes	0	0.0526	-3.651
T Helper Cell Differentiation	0	0.034	NaN
CD28 Signaling in T Helper Cells	0	0.0445	2.673
IL-15 Signaling	0	0.0152	2.646
Role of Cytokines in Mediating Communication between Immune Cells	0	0.037	NaN
Mechanisms of Viral Exit from Host Cells	0	0.0488	NaN
Melatonin Signaling	0	0.0556	0
CDK5 Signaling	0	0.0522	0
ICOS-ICOSL Signaling in T Helper Cells	0	0.0414	2.84
Lipid Antigen Presentation by CD1	0	0.00482	NaN
Cell Cycle Regulation by BTG Family Proteins	0	0.0526	NaN
Role of CHK Proteins in Cell Cycle Checkpoint Control	0	0.0517	NaN
DNA Methylation and Transcriptional Repression Signaling	0	0.051	NaN
ATM Signaling	0	0.05	0
Type I Diabetes Mellitus Signaling	0	0.0314	1.89
p70S6K Signaling	0	0.0207	1.732
G Protein Signaling Mediated by Tubby	0	0.0299	1.155
Communication between Innate and Adaptive Immune Cells	0	0.0236	NaN
CDC42 Signaling	0	0.0556	0.832
EIF2 Signaling	0	0.0391	1.633
Phospholipase C Signaling	0	0.0366	1.961
B Cell Development	0	0.0205	NaN
Regulation of IL-2 Expression in Activated and Anergic T Lymphocytes	0	0.0303	2.138
Granzyme A Signaling	0	0.027	NaN
NUR77 Signaling in T Lymphocytes	0	0.0234	NaN
PKCÎ¸ Signaling in T Lymphocytes	0	0.0466	4.69
Antiproliferative Role of TOB in T Cell Signaling	0	0.0141	0.447
OX40 Signaling Pathway	0	0.0314	1
PI3K Signaling in B Lymphocytes	0	0.0424	3.128
Differential Regulation of Cytokine Production in Macrophages and T Helper Cells by IL-17A and IL-17F	0	0.0556	NaN
Differential Regulation of Cytokine Production in Intestinal Epithelial Cells by IL-17A and IL-17F	0	0.0435	NaN
Hematopoiesis from Pluripotent Stem Cells	0	0.00671	NaN
nNOS Signaling in Neurons	0	0.0426	NaN
ERBB Signaling	0	0.0538	2.236
Heparan Sulfate Biosynthesis	0	0.0444	NaN
Thyroid Hormone Metabolism II (via Conjugation and/or Degradation)	0	0.0238	NaN
Nicotine Degradation III	0	0.05	NaN
Heparan Sulfate Biosynthesis (Late Stages)	0	0.0482	NaN
Pyrimidine Ribonucleotides De Novo Biosynthesis	0	0.0465	NaN
Androgen Biosynthesis	0	0.05	NaN
Ubiquinol-10 Biosynthesis (Eukaryotic)	0	0.0385	NaN
Melatonin Degradation I	0	0.0469	NaN
NAD Salvage Pathway II	0	0.037	NaN
Triacylglycerol Degradation	0	0.0517	NaN
Dermatan Sulfate Biosynthesis (Late Stages)	0	0.04	NaN
D-myo-inositol (1,4,5,6)-Tetrakisphosphate Biosynthesis	0	0.0549	0.378
D-myo-inositol (3,4,5,6)-tetrakisphosphate Biosynthesis	0	0.0549	0.378
TCA Cycle II (Eukaryotic)	0	0.0435	NaN
3-phosphoinositide Degradation	0	0.0466	1.134
Pyrimidine Ribonucleotides Interconversion	0	0.05	NaN
Glycolysis I	0	0.037	NaN
Superpathway of Melatonin Degradation	0	0.0435	NaN
Histidine Degradation VI	0	0.0435	NaN
Fatty Acid Î±-oxidation	0	0.0476	NaN
Oxidative Ethanol Degradation III	0	0.0357	NaN
Superpathway of Methionine Degradation	0	0.0256	NaN
Superpathway of Geranylgeranyldiphosphate Biosynthesis I (via Mevalonate)	0	0.0556	NaN
Superpathway of Cholesterol Biosynthesis	0	0.0345	NaN
Cysteine Biosynthesis III (mammalia)	0	0.0385	NaN
UVC-Induced MAPK Signaling	0	0.0392	NaN
Vitamin-C Transport	0	0.0435	NaN
SAPK/JNK Signaling	0	0.0219	1.897
IL-4 Signaling	0	0.0468	2.117
B Cell Receptor Signaling	0	0.0394	2.837
Insulin Receptor Signaling	0	0.05	1.633
Dopamine Receptor Signaling	0	0.0375	NaN
NF-ÎºB Signaling	0	0.0473	4.811
T Cell Receptor Signaling	0	0.0519	4.017
Sirtuin Signaling Pathway	0	0.0515	-2.714
Th17 Activation Pathway	0	0.0124	2.236
FAT10 Signaling Pathway	0	0.0351	NaN
T Cell Exhaustion Signaling Pathway	0	0.0476	1.886
Xenobiotic Metabolism AHR Signaling Pathway	0	0.046	NaN
Xenobiotic Metabolism CAR Signaling Pathway	0	0.0412	0.378
Xenobiotic Metabolism PXR Signaling Pathway	0	0.0256	0
Kinetochore Metaphase Signaling Pathway	0	0.0364	NaN
